# Supplementary material for: Metabolomic analysis of obesity, metabolic syndrome, and type 2 diabetes: amino acid and acylcarnitine levels change along a spectrum of metabolic wellness
Source: PeerJ. 2018 Aug 31;6:e5410. doi: 10.7717/peerj.5410 (PMC6120443; doi:10.7717/peerj.5410)
Supplement: Data S1 [file peerj-06-5410-s010.xlsx]

## Sheet: AA Sample Data
Sample Group	Sample ID	Gender	Age	PSER	TAU2	ASP2	HYP2	THR2	SER2	ASN2	GLU2	GLN2	SAR	AAD	PRO2	GLY2	ALA2	CIT2	ABU	VAL2	MET2	ALLISO	CYS2	ILE2	LEU2	TYR2	PHE2	BALA2	BABA	GBA	HCY	ETN	TRP2	HYL	ORN2	LYS2	1MHIS	HIS2	3MHIS	ANSP	CARSN	ARG2	Storage time
OBMW	OBMW21	M	20	2.936	224.565	19.111	15.136	125.907	90.419	46.633	260.668	283.369	0	1.92	173.558	239.641	378.638	20.4	24.19	278.094	33.158	0.99	17.634	80.499	178.733	86.813	73.872	10.104	1.429	0	0	26.583	53.821	0.316	66.17	211.626	5.786	73.348	27.793	0	4.93	64.357	1.5
OBMW	OBMW22	F	22	2.669	203.91	18.833	6.618	114.834	110.018	48.672	165.088	392.553	0	0.841	118.082	203.28	411.36	22.162	23.849	212.292	29.21	2.583	7.729	67.037	134.707	70.31	70.625	9.318	1.147	0	0	21.609	44.377	0	55.795	215.069	2.906	82.154	13.463	0	4.723	82.983	1.5
OBMUW	OBMUW7-2	M	34	5.187	221.218	21.208	12.221	142.93	119.075	47.177	271.517	351.526	0.367	1.99	219.704	237.746	629.84	25.708	18.545	323.192	40.223	1.361	17.48	101.562	200.391	98.045	82.487	10.288	1.713	0	0.368	24.038	61.54	0.51	62.408	238.246	4.175	85.401	6.201	0	5.228	94.876	1.5
OBDM	OBDM5-2	M	29	0	144.586	16.676	13.611	125.586	162.678	54.632	269.834	332.79	2.594	1.547	206.926	266.892	490.528	25.233	36.906	324.026	32.108	2.545	17.329	110.37	229.073	67.291	77.091	6.48	1.103	0	1.415	19.581	46.427	0.62	70.249	270.975	4.348	99.298	14.892	0	3.766	149.835	1.5
LMW	LMW1	M	20	0	195.621	19.697	13.695	142.468	152.107	55.845	361.859	190.735	0	0.912	221.37	308.624	271.635	24.169	17.231	188.069	30.663	0	9.099	67.963	136.377	57.562	62.584	8.371	1.273	0	0	24.463	55.784	0	60.737	175.213	5.423	89.419	19.795	0	1.915	110.066	2.5
LMW	LMW2	F	21	0	162.246	22.439	9.199	299.689	136.766	81.682	196.257	298.937	0	0.853	143.131	264.803	433.253	29.304	20.827	295.399	36.28	0	4.264	65.876	142.285	66.858	67.585	8.214	1.507	1.372	0	23.199	53.751	0	49.27	177.105	5.477	133.005	34.39	0	1.238	77.606	2.5
LMW	LMW3	F	21	0	165.877	24.148	12.478	108.783	132.993	48.795	379.694	124.407	0	0	201.508	369.338	342.581	16.357	15.329	194.179	26.775	1.392	7.463	61.038	121.472	54.506	61.357	8.119	2.082	0	0	24.132	46.495	0.976	50.425	179.679	4.049	81.747	16.164	0	1.393	127.655	2.5
LMW	LMW4	F	21	0	164.047	14.963	10.136	135.036	119.325	53.714	308.069	271.862	0	0.819	173.561	306.425	330.031	26.071	23.953	226.466	26.116	1.477	7.037	64.459	135.05	61.817	62.132	8.77	2.948	0	0	20.25	45.185	0	47.898	145.26	6.587	84.468	30.681	0	2.75	81.36	2.5
LMW	LMW21	F	21	6.154	137.915	11.404	29.13	166.398	120.915	56.394	125.459	446.988	2.307	1.44	185.768	249.46	317.612	31.164	31.15	275.11	31.869	0.912	9.356	78.575	143.03	61.409	62.224	7.654	2.065	0.413	0	16.713	51.045	0.318	54.351	228.558	8.943	89.231	32.227	0	4.38	81.077	2.5
LMW	LMW22	M	22	5.67	129.213	8.005	13.542	124.33	79.016	64.541	130.999	512.203	0	1.241	243.536	269.637	499.585	25.527	12.3	231.292	27.711	2.156	10.2	62.859	126.618	59.506	58.208	10.308	1.392	0	0.552	15.141	57.083	0	62.978	199.237	5.065	76.173	16.801	0	6.967	58.145	2.5
LMW	LMW5	M	22	4.267	145.931	14.44	19.929	175.877	129.5	65.71	241.482	348.445	1.375	0.988	206.594	249.697	334.288	34.144	51.281	284.22	36.659	1.721	6.962	73.969	166.125	78.398	70.005	6.151	2.876	0	0	23.996	58.966	0	50.862	223.936	5.52	94.466	7.21	0	5.708	85.842	2.5
LMW	LMW6	F	35	0	195.431	15.881	10.814	100.672	110.174	64.669	224.388	319.785	0	0	177.839	255.173	285.84	26.577	15.502	173.822	27.377	0	6.287	49.588	117.252	65.76	64.654	5.157	2.6	0	0	20.423	58.276	0	46.97	156.786	4.194	82.718	8.75	0	2.731	85.507	2.5
LMW	LMW10	F	34	3.329	152.548	17.406	6.739	169.756	108.35	65.456	205.829	315.454	0.477	0	140.042	227.403	406.96	28.606	9.492	195.364	26.684	0.824	6.234	63.339	128.413	53.96	65.758	7.89	3.266	0.598	0	25.584	52.234	0.31	65.018	183.43	5.017	99.489	14.531	0	3.87	70.557	2.5
LMW	LMW26	F	41	11.216	184.384	14.748	10.325	93.559	122.791	53.693	228.88	372.594	0.293	0	169.02	296.519	296.828	28.224	19.908	141.975	24.296	0.52	6.607	42.266	101.871	49.538	59.516	6.953	1.492	0	0	19.12	35.037	0	41.015	143.165	2.808	81.48	18.232	0	3.852	68.913	2.5
LMW	LMW17	M	59	0	132.6	9.103	12.879	97.184	90.702	55.145	122.667	487.381	0.45	0.559	184.13	258.224	315.018	39.873	22.497	183.406	23.317	0.568	7.903	66.216	128.776	50.766	64.258	7.205	2.836	0	0	17.379	56.209	0	55.316	168.483	5.399	75.104	7.388	0	6.05	90.496	2.5
LMW	LMW18	F	55	0	159.803	14.291	11.271	149.38	126.155	61.827	133.111	441.66	0	0	254.368	487.482	380.272	34.11	16.882	229.377	26.308	0	13.962	63.85	127.895	58.069	57.221	7.1	2.116	0	0	19.099	49.957	0.204	85.453	186.411	5.569	95.88	2.74	0	4.827	46.875	2.5
OBMW	OBMW4	M	25	0	84.502	10.359	15.274	141.339	86.651	38.697	153.37	454.501	0	2.335	237.013	171.429	391.575	28.226	21.058	254.802	25.694	1.475	17.974	76.031	146.702	81.306	64.367	10.078	1.985	0	0	11.637	55.747	0.4	63.891	180.433	5.364	74.15	18.424	0	3.575	90.787	2.5
OBMW	OBMW6	M	32	0	201.754	15.158	6.659	122.089	92.51	51.582	404.723	164.468	1.877	0	183.951	246.596	471.463	28.016	14.174	177.577	24.104	1.458	10.537	66.46	105.801	57.102	52.533	8.697	0	0	0	25.153	43.962	0	60.691	167.187	3.115	83.017	20.288	0	1.648	87.847	2.5
OBMW	OBMW9	M	34	0	272.279	29.033	21.829	236.743	175.034	93.416	277.697	535.721	4.438	1.396	326.477	362.219	636.5	51.012	32.046	352.752	54.14	1.707	17.764	115.007	222.585	105.251	105.414	13.889	2.208	0	0	27.786	73.012	0	100.399	287.515	6.611	137.977	25.942	0	3.14	126.451	2.5
OBMW	OBMW10	F	35	0	210.863	22.927	13.861	236.142	151.639	82.151	262.173	401.653	0	0	286.619	393.879	454.361	44.545	18.53	225.509	36.206	1.468	16.326	74.809	148.044	72.831	69.885	8.674	1.766	0	0	22.144	38.742	0.461	54.156	185.633	4.41	101.293	20.876	0	2.516	107.828	2.5
OBMW	OBMW23	F	31	12.841	105.06	11.724	13.302	97.242	97.957	36.916	153.184	274.473	0.949	1.052	155.181	177.255	396.032	22.503	15.11	209.536	29.174	0.892	22.048	63.655	127.199	86.038	73.773	8.468	1.118	0.155	0	13.258	54.128	0.325	38.35	178.858	4.94	66.291	22.92	0	2.683	90.661	2.5
OBMW	OBMW24	M	33	4.101	181.72	19.725	13.061	168.62	125.398	46.584	169.508	412.952	0.751	2	195.826	230.768	339.45	30.541	23.149	314.541	36.876	1.849	14.482	100.661	194.85	80.484	75.143	16.259	1.188	0	0.651	19.727	58.607	0.348	99.838	255.44	5.845	90.584	57.258	0	5.855	158.876	2.5
OBMW	OBMW25	M	34	6.358	135.916	11.402	9.014	143.424	111.374	60.549	150.537	457.737	0.816	1.117	341.52	266.115	486.718	31.666	18.208	253.2	31.043	1.441	11.336	78.978	161.501	68.771	65.245	11.636	1.345	0	0	13.69	56.959	0.246	62.399	204.672	3.736	86.042	20.818	0	3.985	103.893	2.5
OBMW	OBMW12	F	41	0	254.005	28.789	12.928	163.973	189.114	59.835	385.266	217.592	2.527	1.081	189.065	270.809	478.214	24.409	34.475	273.163	43.349	2.221	10.567	94.753	192.516	90.109	80.565	7.328	2.423	0	0	30.706	59.219	0	88.105	228.658	4.996	88.461	17.991	0	2.819	127.203	2.5
OBMW	OBMW13	F	44	0	219.67	29.655	14.002	180.446	178.849	59.218	294.861	322.037	0	0.901	200.332	325.614	375.906	23.363	12.513	223.702	33.308	0	11.218	77.085	167.04	62.033	75.809	7.276	2.475	0	0	25.035	48.734	0	55.104	202.544	4.359	88.77	8.11	0	2.656	107.548	2.5
OBMW	OBMW14	M	47	0	87.67	11.85	10.752	119.977	110.237	48.961	252.367	379.299	0	0.996	156.547	246.549	397.651	32.576	22.713	177.431	31.484	1.61	12.256	53.14	113.046	94.125	66.636	5.151	1.855	0	0	20.489	64.068	0	74.543	172.483	5.192	87.89	17.308	0	6.38	78.81	2.5
OBMW	OBMW15-2	M	42	4.287	162.283	15.502	10.188	123.292	99.732	61.532	203.569	552.386	0	1.184	271.447	300.792	354.979	42.601	17.455	236.822	29.241	1.096	17.995	72.433	148.666	66.739	73.139	7.727	3.047	0.524	0	20.169	50.485	0	45.535	210.128	4.197	95.515	8.058	0	5.461	95.072	2.5
OBMW	OBMW26	F	43	5.747	181.571	18.315	8.299	216.163	129.545	68.006	220.9	448.338	0.231	0.998	189.594	216.947	456.987	33.52	23.912	203.318	30.336	0	21.562	58.73	121.484	55.826	64.605	8.307	2.926	0.556	0	14.554	50.166	0.262	49.793	207.458	3.62	95.846	14.098	0	3.051	100.564	2.5
OBMW	OBMW27	M	43	4.502	156.344	20.692	31.643	181.972	147.268	51.7	167.64	497.783	1.153	1.432	256.097	283.933	528.228	38.514	31.748	285.889	41.751	1.763	26.596	98.529	184.498	93.574	79.762	12.278	2.062	0.897	0.741	22.004	66.71	0.38	87.354	236.155	5.335	79.221	23.958	0	3.934	165.506	2.5
OBMW	OBMW28	F	44	5.292	215.929	30.281	18.892	150.747	173.357	60.547	203.474	377.522	0.441	0	253.92	412.741	502.672	29.106	25.848	236.412	40.225	0	19.293	76.129	159.3	77.241	78.199	10.41	1.322	0.258	0	34.153	56.479	0.344	64.409	234.05	3.364	95.131	22.155	0	2.404	137.505	2.5
OBMUW	OBMUW4	M	23	4.14	128.807	9.591	10.343	81.638	96.902	43.833	238.534	365.732	3.026	0.983	173.588	306.585	369.296	26.762	9.741	217.92	24.168	3.271	6.785	70.648	150.084	58.494	62.894	7.378	0	0	0.35	16.929	50.302	0	96.696	180.354	5.071	84.744	4.705	0	9.658	44.761	2.5
OBMUW	OBMUW5	F	21	8.932	218.558	19.252	11.119	157.907	125.103	50.895	198.433	421.896	2.974	1.549	217.511	221.696	483.583	26.734	40.73	358.186	36.791	1.978	7.327	99.438	200.727	100.306	83.059	15.01	1.835	0	0	23.946	69.444	0	85.825	234.683	4.507	88.334	27.462	0	5.952	133.103	2.5
OBMUW	OBMUW6	M	36	0	139.214	18.596	10.111	135.955	160.774	62.017	214.518	420.476	0	1.396	266.163	259.917	497.365	26.385	16.393	278.681	40.394	1.635	11.776	103.24	187.874	99.578	87.909	11.949	1.352	0	0	16.776	66.89	0.52	60.362	280.05	4.471	105.055	8.482	0	2.717	221.661	2.5
OBMUW	OBMUW8-2	F	33	0	122.447	23.486	6.472	181.924	103.479	61.235	172.162	382.921	0.688	1.119	213.332	294.921	466.486	20.84	11.813	256.604	28.071	1.714	5.608	68.183	146.924	57.583	74.076	5.503	1.223	1.082	0	19.239	47.611	0.07	41.003	193.636	3.982	108.875	3.462	0	5.129	92.784	2.5
OBMUW	OBMUW9	F	32	6.142	173.048	15.091	28.685	192.251	116.151	55.266	141.217	474.63	0.736	1.063	232.003	232.717	450.082	25.86	18.272	227.719	29.567	2.485	7.501	70.326	129.61	82.257	72.95	8.416	1.635	0	0.309	16.44	46.063	0.529	47.394	175.147	4.971	89.66	7.209	0	4.688	87.866	2.5
OBMUW	OBMUW10	M	31	6.755	172.894	12.319	8.617	113.851	99.031	51.316	147.646	456.799	0	1.466	236.041	224.041	521.412	25.741	21.281	283.569	33.912	1.578	9.527	92.19	176.151	94.294	80.41	13.394	0.314	0	0	21.456	54.768	0	65.291	211.427	4.064	79.212	10.384	0	3.616	90.354	2.5
OBMUW	OBMUW14	F	48	1.193	250.501	26.908	23.447	282.134	171.884	71.151	292.093	319.172	2.501	1.709	432.721	345.475	655.732	24.864	32.735	287.562	42.447	1.505	6.04	104.522	190.345	109.211	89.604	7.407	0.982	0	0	33.262	59.76	0.937	84.511	306.375	6.211	119.321	10.46	0	3.316	147.886	2.5
OBMUW	OBMUW18	M	55	0	139.074	10.742	9.615	146.562	101.98	47.553	129.378	465.348	1.842	1.256	145.047	225.031	357.264	30.951	43.122	298.816	25.445	3.07	34.653	78.273	166.392	71.651	61.783	10.705	2.151	0	0	14.827	46.671	0	67.512	205.547	5.281	79.927	48.798	0	3.428	75.511	2.5
OBMUW	OBMUW19	M	59	6.083	112.275	11.656	8.959	104.58	88.115	42.473	239.086	314.778	0	1.708	208.869	165.091	408.887	27.514	29.19	288.199	24.731	1.571	19.988	69.725	144.658	66.502	68.912	9.412	1.387	0	0.149	15.313	59.035	0	65.342	219.031	5.408	74.038	22.063	0	3.391	87.365	2.5
OBMUW	OBMUW20	F	51	1.833	210.704	26.052	9.207	144.656	109.229	52.885	277.966	396.272	0	1.014	218.987	256.479	462.083	40.574	15.094	258.68	31.197	1.649	34.368	82.591	173.779	79.231	75.163	8.153	1.797	0	0	17.524	55.392	0	107.586	229.666	5.536	86.467	16.112	1.372	2.617	101.147	2.5
OBDM	OBDM2-2	F	28	5.99	153.521	16.581	14.733	130.124	100.33	51.903	193.957	453.914	1.644	1.142	332.191	218.794	555.08	25.367	15.829	272.959	35.31	1.401	19.2	88.363	179.214	98.629	77.032	8.132	0.537	0.334	0.415	19.708	57.065	0.475	66.956	247.603	3.259	83.681	9.314	0	5.634	107.164	2.5
OBDM	OBDM4-2	M	26	0	185.211	23.804	25.044	163.996	156.326	55.871	324.99	224.753	2.02	1.706	284.051	282.096	500.816	18.23	21.361	355.23	35.777	2.308	16.276	98.103	198.389	91.813	83.54	8.682	0	0	0	27.098	62.21	1.115	61.745	263.984	4.643	122.482	7.382	0	1.933	189.444	2.5
OBDM	OBDM7-2	M	35	0	145.694	12.879	11.06	103.474	104.153	46.214	159.872	342.11	0	2.042	199.916	182.936	570.135	17.524	23.641	316.61	32.702	3.126	18.58	97.697	205.866	94.425	72.831	9.352	0	0	0	14.535	58.846	0	46.997	251.193	5.217	80.403	26.364	0	1.811	59.09	2.5
OBDM	OBDM19-2	M	54	0	241.096	26.544	9.806	139.667	123.971	51.711	0	457.448	0	2.999	268.585	217.688	460.508	202.335	25.445	408.266	34.02	1.617	25.71	111.131	227.984	96.981	84.87	0	3.53	0	0	26.451	58.648	0.724	105.209	312.985	7.548	77.56	15.363	0	5.748	124.244	2.5
OBDM	OBDM20-2	M	52	0	197.617	14.006	17.624	158.448	126.617	55.01	0	519.415	0	1.719	288.724	311.642	414.17	166.808	22.127	368.39	34.478	1.951	21.991	116.312	213.361	87.822	75.786	0	3.257	0	0	16.577	64.983	0.236	89.488	249.337	5.983	89.693	12.739	0	5.667	50.178	2.5
LMW	LMW7	F	31	0	179.268	28.572	8.082	201.05	163.372	69.868	194.988	358.098	0	0.866	183.878	243.76	359.55	25.215	30.208	261.348	34.765	1.783	12.082	73.073	156.112	55.596	69.529	8.673	1.563	0	0	19.916	37.52	0	58.688	271.476	5.278	115.379	25.126	0	2.368	175.577	3.5
LMW	LMW8	F	33	0	147.299	21.622	8.23	224.404	123.975	86.616	227.076	347.197	0	0	138.949	231.279	338.63	23.264	17.85	204.694	29.16	0	8.977	65.031	138.115	50.598	59.224	6.806	1.839	0	0	20.054	43.819	0	57.588	178.083	2.711	96.524	15.684	0	2.31	74.879	3.5
LMW	LMW9-2	M	33	0	142.6	15.299	7.992	134.389	110.305	58.892	117.154	564.503	1.843	0.944	253.971	366.236	490.241	34.24	13.832	227.114	33.611	1.632	12.066	70.409	144.893	72.483	66.017	8.31	1.134	0	0	15.885	57.137	0.773	79.784	205.902	4.304	93.506	11.779	0	5.028	103.975	3.5
LMW	LMW11	F	43	0	236.184	29.796	5.628	179.71	198.631	74.333	230.029	450.564	0	0	273.228	465.95	517.37	28.133	21.973	239.857	38.615	1.608	7.046	80.18	165.52	72.244	75.444	7.744	1.743	1.308	0	25.404	50.251	0.37	64.586	239.207	2.932	100.822	7.322	0	2.36	180.355	3.5
LMW	LMW15	M	45	0	153.911	14.706	11.961	170.329	111.979	60.563	171.748	553.948	0	1.014	328.665	355.644	346.344	32.95	25.814	216.33	32.19	1.664	10.486	60.241	132.308	58.238	61.924	6.207	2.391	0	0	15.373	52.937	0	74.402	221.131	5.336	94.632	8.563	0	6.09	108.153	3.5
LMW	LMW16	F	50	0	137.654	17.818	8.637	141.805	110.138	50.3	253.058	318.149	0	0	126.033	252.036	250.526	32.909	14.776	159.84	23.128	0	11.029	43.283	110.209	70.351	57.889	6.405	2.19	0	0	17.801	37.916	0	65.454	192.267	3.045	83.519	11.465	0	3.985	117.251	3.5
LMW	LMW23	M	38	2.984	269.326	26.876	14.341	177.074	164.236	62.648	287.916	357.027	1.057	0.869	180.717	333.326	300.588	36.518	23.22	217.613	36.912	0.939	13.57	73.294	153.309	67.085	68.944	7.742	3.401	0.352	0.663	24.989	42.145	0	55.938	221.574	6.271	98.742	27.254	0	3.844	104.312	3.5
OBMW	OBMW2	F	20	0	162.33	21.757	9.676	152.836	128.867	60.407	227.751	388.19	0	0	207.169	280.652	510.514	27.693	23.022	219.458	34.819	1.415	9.86	75.663	148.59	76.625	79.193	8.333	1.641	0	0	18.626	38.841	0	70.882	208.994	3.76	91.094	12.185	0	2.77	113.12	3.5
OBMW	OBMW3	M	26	0	156.278	19.409	12.63	117.123	135.77	52.404	208.582	289.098	0	1.114	170.055	194.873	616.051	24.528	16.764	274.325	34.362	1.898	23.586	94.537	177.818	77.52	77.463	10.025	1.473	0	0	23.586	64.336	0	58.173	188.208	5.049	90.635	17.894	0	2.653	96.683	3.5
OBMW	OBMW7	F	33	0	170.625	17.518	14.384	139.688	112.169	57.283	133.458	390.832	0	1.008	335.277	206.668	381.581	23.57	16.486	233.701	26.425	0	27.89	65.375	140.292	80.168	69.472	6.887	1.13	0	0	14.983	57.592	0	93.877	190.963	3.83	85.604	11.284	0	2.286	50.628	3.5
OBMW	OBMW8	F	38	0	232.029	21.235	23.857	190.058	123.492	57.84	293.168	274.738	0	1.54	213.794	195.214	420.135	10.781	19.152	271.126	30.407	0	7.998	93.239	176.845	64.639	55.144	6.601	0	0	0	19.372	53.492	0	67.923	220.409	3.204	74.959	6.382	0	2.342	72.844	3.5
OBMW	OBMW16	F	50	0	356.412	45.698	11.045	228.885	208.987	75.779	491.521	222.517	0	1.04	245.149	353.52	604.562	43.876	17.957	286.12	48.429	1.53	20.97	108.56	220.234	109.481	101.428	7.852	1.532	1.013	0	44.218	50.073	0	106.571	295.847	5.658	115.092	26.826	0	1.648	160.022	3.5
OBMW	OBMW18	M	50	0	164.274	16.399	13.29	158.213	114.36	50.916	178.354	333.107	0	1.13	168.762	263.752	403.447	25.844	15.741	260.608	30.145	2.408	17.046	81.651	166.904	71.205	65.808	9.703	0	0	0	19.688	47.286	0	45.202	219.584	6.116	104.625	32.163	0	3.536	127.961	3.5
OBMUW	OBMUW2-2	F	28	0	210.799	19.999	10.798	136.399	122.005	61.093	145.678	483.109	0	0.809	212.368	357.459	409.455	24.073	16.4	291.168	26.194	2.874	13.019	91.253	170.438	58.457	61.068	5.288	1.758	0.125	0	18.052	48.785	0.659	78.006	231.797	4.243	89.824	18.261	0	4.228	93.285	3.5
OBMUW	OBMUW3	F	28	0	198.633	17.962	7.196	132.193	102.518	48.692	209.12	379.506	0.96	1.031	187.646	262.26	443.007	17.307	21.252	272.503	31.585	1.42	8.743	78.856	171.369	89.083	75.813	8.541	1.427	0	0.05	25.899	58.115	0.463	77.821	243.598	4.788	76.441	15.955	1.074	5.459	89.325	3.5
OBMUW	OBMUW15	F	46	2.698	143.43	19.481	14.214	136.306	97.589	48.593	167.054	356.669	0	1.609	216.455	158.3	489.397	25.18	9.814	259.182	27.202	2.067	24.444	86.351	152.176	59.23	70.153	6.95	0	0	0	20.16	43.464	1.221	41.341	268.033	6.124	88.82	12.59	0	2.32	136.817	3.5
OBMUW	OBMUW16	M	51	1.202	188.58	25.702	17.679	156.665	122.937	57.198	444.525	175.476	2.586	1.012	231.786	277.9	563.814	39.667	16.15	236.951	38.074	1.998	18.792	92.641	174.674	81.528	85.21	7.609	1.32	0	0	28.592	56.439	0	87.258	208.183	4.185	96.721	16.697	0	2.995	97.902	3.5
OBDM	OBDM8-2	F	35	0	169.522	27.834	8.579	138.781	174.739	59.059	263.41	288.854	1.906	1.135	210.29	231.188	653.767	16.465	42.613	302.185	44.131	1.381	6.661	105.141	217.21	89.046	95.501	12.091	2.111	0.231	0	25.187	58.471	0.091	45.554	326.072	4.648	108.97	9.531	0	2.818	263.062	3.5
OBDM	OBDM9-2	M	31	0	187.675	18.812	6.857	108.95	126.024	46.839	168.625	267.121	2.009	1.07	159.47	321.308	472.528	29.388	39.573	346.312	39.554	2.864	10.23	110.283	237.741	84.33	80.83	8.575	2.08	0	0	28.274	55.064	1.566	52.704	265.808	4	87.834	14.838	0	4.319	147.089	3.5
OBDM	OBDM10-2	F	30	0	204.64	23.347	5.991	107.087	107.686	37.609	158.179	260.225	0.089	1.184	161.799	155.693	347.391	12.287	16.658	287.604	26.136	2.85	21.903	77.025	167.444	49.177	67.422	4.413	1.018	0	0.033	19.513	49.813	0	40.796	199.044	2.94	69.106	7.562	0	2.296	103.651	3.5
OBDM	OBDM12	F	43	0	221.24	19.632	7.83	125.841	121.457	45.18	281.121	279.785	0	0.883	273.576	305.82	493.458	15.805	12.85	232.148	28.316	1.349	22.356	75.819	135.553	77.518	68.214	7.774	1.597	0	0	24.065	49.458	0.539	66.029	217.154	4.082	64.806	19.247	0	1.88	69.333	3.5
OBDM	OBM13	F	45	0	287.639	27.282	20.156	145.252	167.891	55.275	184.678	381.94	0	1.369	225.555	274.579	594.833	32.652	35.333	306.308	38.602	1.401	27.151	115.317	211.12	80.735	89.174	6.64	1.703	1.379	0	29.775	59.307	0.688	48.537	230.335	5.456	95.427	18.345	0	2.006	187.518	3.5
OBDM	OBDM14	M	45	1.789	182.723	27.512	21.347	129.894	124.666	50.722	274.008	393.719	0	1.651	299.552	264.13	612.183	28.863	18.738	284.595	28.395	2.489	21.091	108.468	194.876	85.499	72.424	10.056	1.606	0	0	25.516	56.697	0.919	92.364	183.69	6.297	95.789	17.422	0	3.578	94.295	3.5
OBDM	OBDM26-2	M	45	2.536	155.741	18.547	11.471	141.474	98.602	47.399	362.285	256.166	2.423	1.324	346.24	252.991	556.186	34.437	20.358	349.342	31.352	2.386	7.955	106.881	213.958	97.663	78.848	8.019	0.936	0	0	22.849	62.295	0.516	91.862	215.231	7.778	91.621	11.718	0	4.579	77.858	3.5
OBDM	OBDM16-2	M	57	0	71.511	9.622	5.579	116.013	103.524	47.172	162.474	380.342	2.203	2.218	235.689	253.911	633.956	21.753	23.79	326.51	27.353	2.922	12.998	88.761	178.055	80.38	67.637	5.243	1.332	0	0	16.218	53.079	0.558	56.24	228.502	4.109	78.484	11.669	0	5.366	69.516	3.5
OBDM	OBDM17	F	50	0.78	218.413	36.363	8.262	104.316	148.774	46.895	247.691	307.891	0	1.108	180.3	250.856	452.649	18.33	17.154	309.732	32.987	2.393	20.546	104.813	206.363	77.111	83.891	6.919	2.786	0	0	27.372	49.711	0.475	49.972	193.385	5.032	83.463	11.532	0	1.498	91.805	3.5
LMW	LMW12	M	44	0	192.827	21.014	23.936	154.796	137.621	61.372	223.069	391.094	0	1.181	227.094	262.593	500.661	22.081	29.268	290.573	36.84	2.396	8.844	91.487	177.067	59.696	68.791	12.107	1.192	0	0	20.134	50.777	1.389	54.878	210.272	6.295	90.552	26.143	0	2.462	87.776	4.5
LMW	LMW13	F	45	0.026	235.698	31.713	5.163	114.351	182.928	58.918	222.979	346.915	2.804	0.228	199.576	454.694	389.699	27.208	12.802	247.438	35.283	0	1.789	75.65	157.137	71.514	80.496	5.082	1.536	0.137	0	30.564	58.093	1.365	64.771	208.307	2.757	91.755	4.436	0	3.836	171.865	4.5
LMW	LMW14	F	46	0.445	173.467	26.371	4.939	121.092	145.215	59.105	320.102	248.988	1.622	0	202.922	401.645	441.472	30.968	14.99	175.955	32.338	0	9.713	67.1	136.797	65.27	66.741	4.074	1.163	0	0	24.404	51.386	0.614	63.315	200.683	2.466	77.88	9.802	0	1.915	155.127	4.5
LMW	LMW19	F	50	0	193.539	16.723	8.019	133.857	131.644	52.076	120.317	401.037	0	0.277	113.065	242.975	358.004	27.32	24.562	214.104	30.242	1.357	18.274	66.024	141.115	57.566	68.454	6.298	1.867	0.23	0	17.684	42.249	1.695	63.175	196.608	3.01	82.682	19.704	0	3.271	108.958	4.5
LMW	LMW20	M	52	2.75	258.995	41.321	17.7	161.214	141.742	57.49	481.734	139.067	2.741	1.137	223.61	349.94	451.711	28.968	16.738	263.562	35.896	1.691	9.454	87.295	165.585	64.48	71.283	6.952	1.018	0.797	0	43.705	64.92	1.362	87.543	222.694	7.998	95.349	14.915	0	1.755	97.689	4.5
OBMW	OBMW17-2	F	50	0	135.5	13.574	9.097	145.544	114.454	47.448	128.599	480.668	0.371	0	162.82	279.735	369.461	35.654	21.129	242.424	29.769	0	15.715	63.343	132.401	71.628	59.811	7.258	1.616	0	0	16.669	49.782	0.263	64.838	186.796	5.007	74.187	14.709	0	5.106	102.847	4.5
OBMW	OBMW20	M	51	0	312.049	46.02	30.407	158.852	163.276	54.571	325.834	345.142	0	1.998	228.01	259.514	399.136	30.533	31.961	304.07	37.618	1.013	10.32	96.945	186.291	93.757	81.893	8.102	1.64	0.754	0	26.918	57.086	0.614	93.847	239.708	5.476	91.412	17.949	0	1.835	85.583	4.5
OBMUW	OBMUW1	M	21	0	223.727	26.92	16.349	164.425	152.074	62.628	403.693	315.706	1.915	1.864	246.421	268.354	616.88	28.318	29.553	305.015	39.953	2.552	22.259	113.478	223.82	90.804	89.963	10.95	1.566	0	0	31.568	66.578	0	88.057	252.14	6.356	101.766	29.071	0	1.888	154.333	4.5
OBMUW	OBMUW11	F	41	1.287	230.589	30.509	14.93	164.888	152.747	54.078	270.371	384.282	0	1.065	254.604	242	545.452	24.555	15.796	223.168	36.42	1.305	14.457	80.333	153.454	82.938	73.88	8.787	3.808	0	0	31.475	49.253	1.284	62.907	255.383	3.322	95.177	22.142	0	3.64	190.818	4.5
OBMUW	OBMUW12-2	M	44	7.074	193.575	21.606	12.059	159.845	129.01	49.116	173.063	482.759	0.498	1.238	300.747	267.451	529.304	55.854	24.033	286.085	32.631	2.096	17.742	98.889	173.535	77.647	71.684	9.061	1.981	0	0.398	20.191	51.638	0	71.378	200.485	5.819	89.305	20.354	0	3.904	98.833	4.5
OBMUW	OBMUW13	M	41	3.588	219.792	29.658	8.655	148.647	153.217	64.575	308.238	381.489	5.924	2.015	286.885	274.205	490.079	42.588	14.576	343.193	40.931	1.711	18.928	108.696	223.683	83.338	92.558	11.747	2.587	0.989	0	31.851	60.247	1.463	78.752	291.82	6.47	131.551	47.796	0	4.006	203.69	4.5
OBDM	OBDM3-22	F	28	1.521	122.076	29.435	12.606	150.526	144.663	48.617	237.766	361.006	1.942	1.511	265.923	234.553	516.003	18.915	12.6	281.014	33.107	1.38	17.654	87.706	147.103	96.432	106.64	24.695	1.224	0.79	0	27.377	52.843	1.268	63.612	257.581	5.85	88.19	37.168	0	3.258	144.759	5.5
OBDM	OBDM6-2	M	35	6.284	150.217	15.098	18.258	115.617	102.785	43.341	240.533	278.267	2.328	1.215	191.041	250.158	422.657	37.139	19.922	270.608	24.918	1.02	18.792	87.286	163.516	59.493	68.982	8.248	0.989	0.116	0	24.43	52.456	0	69.187	219.75	6.04	86.634	9.93	0	5.285	105.79	5.5
OBMW	OBMW1	F	29	0	227.398	32.915	22.778	136.805	192.09	56.942	281.67	312.34	0	0.855	256.41	495.779	422.625	27.722	24.169	208.648	37.837	0	9.086	80.397	155.521	75.398	81.815	6.159	2.437	0	0	29.339	53.017	0	78.682	198.631	5.737	96.782	12.39	0	1.486	95.488	6.5
OBMW	OBMW19	F	59	0	200.176	23.664	16.009	136.571	157.536	56.659	162.347	519.749	1.855	0.856	178.027	489.292	370.062	39.873	16.81	224.088	32.276	1.56	13.062	70.561	150.059	72.765	71.798	6.531	1.564	0	0	22.877	63.11	0	88.058	205.516	5.717	90.363	16.096	0	3.535	131.162	6.5
OBMUW	OBMUW17	M	51	0	219.878	30.649	14.916	162.461	137.218	48.354	388.064	153.171	2.468	1.836	287.658	237.028	559.041	34.318	21.385	327.875	38.995	2.254	13.661	121.311	225.14	119.374	90.339	9.73	1.472	0.926	0	30.135	71.376	0	116.093	231.341	6.303	89.164	23.302	0	1.23	87.389	6.5
OBDM	OBDM15-2	F	44	0	149.677	12.822	5.685	66.985	92.608	42.825	281.433	184.801	3.483	0	124.535	269.63	361.519	11.874	21.636	220.367	21.753	2.277	9.755	71.693	141.133	36.791	53.254	4.471	1.495	0	0	18.868	34.322	0.593	34.456	192.986	3.844	67.896	6.694	0	4.842	62.621	6.5
OBDM	OBDM18	F	59	0	178.319	16.495	15.518	115.861	129.03	44.492	148.076	419.388	2.424	1.52	183.113	187.937	408.183	40.208	35.165	337.027	28.136	2.212	55.12	103.73	201.812	85.515	71.7	11.827	1.368	0	0	15.017	47.043	0	96.326	231.925	4.915	81.45	24.565	6.685	2.323	58.148	6.5
OBDM	OBDM1	F	28	0.781	279.606	48.86	8.067	140.417	160.254	53.107	320.521	210.428	0	0.951	220.518	216.998	466.207	21.989	15.145	291	38.929	1.508	8.251	99.198	197.986	78.351	82.199	8.953	1.271	0	0	36.59	55.955	0	51.999	218.727	3.194	100.297	9.068	0	0	110.802	7.5
																																											3.33333
																																											3
	Amino Acid
	LMW11
	OBDM11
	OBMW9
	LMW1
	LMW2
	LMW3
	LMW4
	LMW6
	LMW7
	LMW8
	OBDM7
	OBDM10
	OBDM12
	OBDM15
	OBDM6
	OBMUW11
	OBMUW12
	OBMUW13
	OBMW1
	OBMW2
	OBMW3
	OBMW6
	OBMW8
	OBMW10
	OBMW13
	OBMW14
	OBMW16
	OBMW18
	OBMW19
	OBMW12
	OBMW17
	OBM13
	LMW12
	LMW14
	LMW15
	LMW16
	OBDM1
	OBDM7-2
	OBDM14
	OBDM16
	OBDM17
	OBDM18
	OBMUW1
	OBMUW6
	OBMUW15
	OBMUW16
	OBMUW17
	OBMUW18
	OBMUW20
	OBMW4
	OBMW7
	OBMW11
	OBMW15
	Amino Acid
	LMW11
	OBDM11
	OBMW9
	LMW1
	LMW2
	LMW3
	LMW4
	LMW6
	LMW7
	LMW8
	OBDM7
	OBDM10
	OBDM12
	OBDM15
	OBDM6
	OBMUW11
	OBMUW12
	OBMUW13
	OBMW1
	OBMW2
	OBMW3
	OBMW6
	OBMW8
	OBMW10
	OBMW13
	OBMW14
	OBMW16
	OBMW18
	OBMW19
	OBMW12
	OBMW17
	OBM13
	LMW12
	LMW14
	LMW15
	LMW16
	OBDM1
	OBDM7-2
	OBDM14
	OBDM16
	OBDM17
	OBDM18
	OBMUW1
	OBMUW6
	OBMUW15
	OBMUW16
	OBMUW17
	OBMUW18
	OBMUW20
	OBMW4
	OBMW7
	OBMW11
	OBMW15
	Amino Acid
	LMW11
	OBDM11
	OBMW9
	LMW1
	LMW2
	LMW3
	LMW4
	LMW6
	LMW7
	LMW8
	OBDM7
	OBDM10
	OBDM12
	OBDM15
	OBDM6
	OBMUW11
	OBMUW12
	OBMUW13
	OBMW1
	OBMW2
	OBMW3
	OBMW6
	OBMW8
	OBMW10
	OBMW13
	OBMW14
	OBMW16
	OBMW18
	OBMW19
	OBMW12
	OBMW17
	OBM13
	LMW12
	LMW14
	LMW15
	LMW16
	OBDM1
	OBDM7-2
	OBDM14
	OBDM16
	OBDM17
	OBDM18
	OBMUW1
	OBMUW6
	OBMUW15
	OBMUW16
	OBMUW17
	OBMUW18
	OBMUW20
	OBMW4
	OBMW7
	OBMW11
	OBMW15
	Amino Acid
	LMW11
	OBDM11
	OBMW9
	LMW1
	LMW2
	LMW3
	LMW4
	LMW6
	LMW7
	LMW8
	OBDM7
	OBDM10
	OBDM12
	OBDM15
	OBDM6
	OBMUW11
	OBMUW12
	OBMUW13
	OBMW1
	OBMW2
	OBMW3
	OBMW6
	OBMW8
	OBMW10
	OBMW13
	OBMW14
	OBMW16
	OBMW18
	OBMW19
	OBMW12
	OBMW17
	OBM13
	LMW12
	LMW14
	LMW15
	LMW16
	OBDM1
	OBDM7-2
	OBDM14
	OBDM16
	OBDM17
	OBDM18
	OBMUW1
	OBMUW6
	OBMUW15
	OBMUW16
	OBMUW17
	OBMUW18
	OBMUW20
	OBMW4
	OBMW7
	OBMW11
	OBMW15
	Amino Acid
	LMW11
	OBDM11
	OBMW9
	LMW1
	LMW2
	LMW3
	LMW4
	LMW6
	LMW7
	LMW8
	OBDM7
	OBDM10
	OBDM12
	OBDM15
	OBDM6
	OBMUW11
	OBMUW12
	OBMUW13
	OBMW1
	OBMW2
	OBMW3
	OBMW6
	OBMW8
	OBMW10
	OBMW13
	OBMW14
	OBMW16
	OBMW18
	OBMW19
	OBMW12
	OBMW17
	OBM13
	LMW12
	LMW14
	LMW15
	LMW16
	OBDM1
	OBDM7-2
	OBDM14
	OBDM16
	OBDM17
	OBDM18
	OBMUW1
	OBMUW6
	OBMUW15
	OBMUW16
	OBMUW17
	OBMUW18
	OBMUW20
	OBMW4
	OBMW7
	OBMW11
	OBMW15
	Amino Acid
	LMW11
	OBDM11
	OBMW9
	LMW1
	LMW2
	LMW3
	LMW4
	LMW6
	LMW7
	LMW8
	OBDM7
	OBDM10
	OBDM12
	OBDM15
	OBDM6
	OBMUW11
	OBMUW12
	OBMUW13
	OBMW1
	OBMW2
	OBMW3
	OBMW6
	OBMW8
	OBMW10
	OBMW13
	OBMW14
	OBMW16
	OBMW18
	OBMW19
	OBMW12
	OBMW17
	OBM13
	LMW12
	LMW14
	LMW15
	LMW16
	OBDM1
	OBDM7-2
	OBDM14
	OBDM16
	OBDM17
	OBDM18
	OBMUW1
	OBMUW6
	OBMUW15
	OBMUW16
	OBMUW17
	OBMUW18
	OBMUW20
	OBMW4
	OBMW7
	OBMW11
	OBMW15
	Amino Acid
	LMW11
	OBDM11
	OBMW9
	LMW1
	LMW2
	LMW3
	LMW4
	LMW6
	LMW7
	LMW8
	OBDM7
	OBDM10
	OBDM12
	OBDM15
	OBDM6
	OBMUW11
	OBMUW12
	OBMUW13
	OBMW1
	OBMW2
	OBMW3
	OBMW6
	OBMW8
	OBMW10
	OBMW13
	OBMW14
	OBMW16
	OBMW18
	OBMW19
	OBMW12
	OBMW17
	OBM13
	LMW12
	LMW14
	LMW15
	LMW16
	OBDM1
	OBDM7-2
	OBDM14
	OBDM16
	OBDM17
	OBDM18
	OBMUW1
	OBMUW6
	OBMUW15
	OBMUW16
	OBMUW17
	OBMUW18
	OBMUW20
	OBMW4
	OBMW7
	OBMW11
	OBMW15
	Amino Acid
	LMW11
	OBDM11
	OBMW9
	LMW1
	LMW2
	LMW3
	LMW4
	LMW6
	LMW7
	LMW8
	OBDM7
	OBDM10
	OBDM12
	OBDM15
	OBDM6
	OBMUW11
	OBMUW12
	OBMUW13
	OBMW1
	OBMW2
	OBMW3
	OBMW6
	OBMW8
	OBMW10
	OBMW13
	OBMW14
	OBMW16
	OBMW18
	OBMW19
	OBMW12
	OBMW17
	OBM13
	LMW12
	LMW14
	LMW15
	LMW16
	OBDM1
	OBDM7-2
	OBDM14
	OBDM16
	OBDM17
	OBDM18
	OBMUW1
	OBMUW6
	OBMUW15
	OBMUW16
	OBMUW17
	OBMUW18
	OBMUW20
	OBMW4
	OBMW7
	OBMW11
	OBMW15
	Amino Acid
	LMW11
	OBDM11
	OBMW9
	LMW1
	LMW2
	LMW3
	LMW4
	LMW6
	LMW7
	LMW8
	OBDM7
	OBDM10
	OBDM12
	OBDM15
	OBDM6
	OBMUW11
	OBMUW12
	OBMUW13
	OBMW1
	OBMW2
	OBMW3
	OBMW6
	OBMW8
	OBMW10
	OBMW13
	OBMW14
	OBMW16
	OBMW18
	OBMW19
	OBMW12
	OBMW17
	OBM13
	LMW12
	LMW14
	LMW15
	LMW16
	OBDM1
	OBDM7-2
	OBDM14
	OBDM16
	OBDM17
	OBDM18
	OBMUW1
	OBMUW6
	OBMUW15
	OBMUW16
	OBMUW17
	OBMUW18
	OBMUW20
	OBMW4
	OBMW7
	OBMW11
	OBMW15
	Amino Acid
	LMW11
	OBDM11
	OBMW9
	LMW1
	LMW2
	LMW3
	LMW4
	LMW6
	LMW7
	LMW8
	OBDM7
	OBDM10
	OBDM12
	OBDM15
	OBDM6
	OBMUW11
	OBMUW12
	OBMUW13
	OBMW1
	OBMW2
	OBMW3
	OBMW6
	OBMW8
	OBMW10
	OBMW13
	OBMW14
	OBMW16
	OBMW18
	OBMW19
	OBMW12
	OBMW17
	OBM13
	LMW12
	LMW14
	LMW15
	LMW16
	OBDM1
	OBDM7-2
	OBDM14
	OBDM16
	OBDM17
	OBDM18
	OBMUW1
	OBMUW6
	OBMUW15
	OBMUW16
	OBMUW17
	OBMUW18
	OBMUW20
	OBMW4
	OBMW7
	OBMW11
	OBMW15
	Amino Acid
	LMW11
	OBDM11
	OBMW9
	LMW1
	LMW2
	LMW3
	LMW4
	LMW6
	LMW7
	LMW8
	OBDM7
	OBDM10
	OBDM12
	OBDM15
	OBDM6
	OBMUW11
	OBMUW12
	OBMUW13
	OBMW1
	OBMW2
	OBMW3
	OBMW6
	OBMW8
	OBMW10
	OBMW13
	OBMW14
	OBMW16
	OBMW18
	OBMW19
	OBMW12
	OBMW17
	OBM13
	LMW12
	LMW14
	LMW15
	LMW16
	OBDM1
	OBDM7-2
	OBDM14
	OBDM16
	OBDM17
	OBDM18
	OBMUW1
	OBMUW6
	OBMUW15
	OBMUW16
	OBMUW17
	OBMUW18
	OBMUW20
	OBMW4
	OBMW7
	OBMW11
	OBMW15
	Amino Acid
	LMW11
	OBDM11
	OBMW9
	LMW1
	LMW2
	LMW3
	LMW4
	LMW6
	LMW7
	LMW8
	OBDM7
	OBDM10
	OBDM12
	OBDM15
	OBDM6
	OBMUW11
	OBMUW12
	OBMUW13
	OBMW1
	OBMW2
	OBMW3
	OBMW6
	OBMW8
	OBMW10
	OBMW13
	OBMW14
	OBMW16
	OBMW18
	OBMW19
	OBMW12
	OBMW17
	OBM13
	LMW12
	LMW14
	LMW15
	LMW16
	OBDM1
	OBDM7-2
	OBDM14
	OBDM16
	OBDM17
	OBDM18
	OBMUW1
	OBMUW6
	OBMUW15
	OBMUW16
	OBMUW17
	OBMUW18
	OBMUW20
	OBMW4
	OBMW7
	OBMW11
	OBMW15
	Amino Acid
	LMW11
	OBDM11
	OBMW9
	LMW1
	LMW2
	LMW3
	LMW4
	LMW6
	LMW7
	LMW8
	OBDM7
	OBDM10
	OBDM12
	OBDM15
	OBDM6
	OBMUW11
	OBMUW12
	OBMUW13
	OBMW1
	OBMW2
	OBMW3
	OBMW6
	OBMW8
	OBMW10
	OBMW13
	OBMW14
	OBMW16
	OBMW18
	OBMW19
	OBMW12
	OBMW17
	OBM13
	LMW12
	LMW14
	LMW15
	LMW16
	OBDM1
	OBDM7-2
	OBDM14
	OBDM16
	OBDM17
	OBDM18
	OBMUW1
	OBMUW6
	OBMUW15
	OBMUW16
	OBMUW17
	OBMUW18
	OBMUW20
	OBMW4
	OBMW7
	OBMW11
	OBMW15
	Amino Acid
	LMW11
	OBDM11
	OBMW9
	LMW1
	LMW2
	LMW3
	LMW4
	LMW6
	LMW7
	LMW8
	OBDM7
	OBDM10
	OBDM12
	OBDM15
	OBDM6
	OBMUW11
	OBMUW12
	OBMUW13
	OBMW1
	OBMW2
	OBMW3
	OBMW6
	OBMW8
	OBMW10
	OBMW13
	OBMW14
	OBMW16
	OBMW18
	OBMW19
	OBMW12
	OBMW17
	OBM13
	LMW12
	LMW14
	LMW15
	LMW16
	OBDM1
	OBDM7-2
	OBDM14
	OBDM16
	OBDM17
	OBDM18
	OBMUW1
	OBMUW6
	OBMUW15
	OBMUW16
	OBMUW17
	OBMUW18
	OBMUW20
	OBMW4
	OBMW7
	OBMW11
	OBMW15
	Amino Acid
	LMW11
	OBDM11
	OBMW9
	LMW1
	LMW2
	LMW3
	LMW4
	LMW6
	LMW7
	LMW8
	OBDM7
	OBDM10
	OBDM12
	OBDM15
	OBDM6
	OBMUW11
	OBMUW12
	OBMUW13
	OBMW1
	OBMW2
	OBMW3
	OBMW6
	OBMW8
	OBMW10
	OBMW13
	OBMW14
	OBMW16
	OBMW18
	OBMW19
	OBMW12
	OBMW17
	OBM13
	LMW12
	LMW14
	LMW15
	LMW16
	OBDM1
	OBDM7-2
	OBDM14
	OBDM16
	OBDM17
	OBDM18
	OBMUW1
	OBMUW6
	OBMUW15
	OBMUW16
	OBMUW17
	OBMUW18
	OBMUW20
	OBMW4
	OBMW7
	OBMW11
	OBMW15
	Amino Acid
	LMW11
	OBDM11
	OBMW9
	LMW1
	LMW2
	LMW3
	LMW4
	LMW6
	LMW7
	LMW8
	OBDM7
	OBDM10
	OBDM12
	OBDM15
	OBDM6
	OBMUW11
	OBMUW12
	OBMUW13
	OBMW1
	OBMW2
	OBMW3
	OBMW6
	OBMW8
	OBMW10
	OBMW13
	OBMW14
	OBMW16
	OBMW18
	OBMW19
	OBMW12
	OBMW17
	OBM13
	LMW12
	LMW14
	LMW15
	LMW16
	OBDM1
	OBDM7-2
	OBDM14
	OBDM16
	OBDM17
	OBDM18
	OBMUW1
	OBMUW6
	OBMUW15
	OBMUW16
	OBMUW17
	OBMUW18
	OBMUW20
	OBMW4
	OBMW7
	OBMW11
	OBMW15
	Amino Acid
	LMW11
	OBDM11
	OBMW9
	LMW1
	LMW2
	LMW3
	LMW4
	LMW6
	LMW7
	LMW8
	OBDM7
	OBDM10
	OBDM12
	OBDM15
	OBDM6
	OBMUW11
	OBMUW12
	OBMUW13
	OBMW1
	OBMW2
	OBMW3
	OBMW6
	OBMW8
	OBMW10
	OBMW13
	OBMW14
	OBMW16
	OBMW18
	OBMW19
	OBMW12
	OBMW17
	OBM13
	LMW12
	LMW14
	LMW15
	LMW16
	OBDM1
	OBDM7-2
	OBDM14
	OBDM16
	OBDM17
	OBDM18
	OBMUW1
	OBMUW6
	OBMUW15
	OBMUW16
	OBMUW17
	OBMUW18
	OBMUW20
	OBMW4
	OBMW7
	OBMW11
	OBMW15
	Amino Acid
	LMW11
	OBDM11
	OBMW9
	LMW1
	LMW2
	LMW3
	LMW4
	LMW6
	LMW7
	LMW8
	OBDM7
	OBDM10
	OBDM12
	OBDM15
	OBDM6
	OBMUW11
	OBMUW12
	OBMUW13
	OBMW1
	OBMW2
	OBMW3
	OBMW6
	OBMW8
	OBMW10
	OBMW13
	OBMW14
	OBMW16
	OBMW18
	OBMW19
	OBMW12
	OBMW17
	OBM13
	LMW12
	LMW14
	LMW15
	LMW16
	OBDM1
	OBDM7-2
	OBDM14
	OBDM16
	OBDM17
	OBDM18
	OBMUW1
	OBMUW6
	OBMUW15
	OBMUW16
	OBMUW17
	OBMUW18
	OBMUW20
	OBMW4
	OBMW7
	OBMW11
	OBMW15
	Amino Acid
	LMW11
	OBDM11
	OBMW9
	LMW1
	LMW2
	LMW3
	LMW4
	LMW6
	LMW7
	LMW8
	OBDM7
	OBDM10
	OBDM12
	OBDM15
	OBDM6
	OBMUW11
	OBMUW12
	OBMUW13
	OBMW1
	OBMW2
	OBMW3
	OBMW6
	OBMW8
	OBMW10
	OBMW13
	OBMW14
	OBMW16
	OBMW18
	OBMW19
	OBMW12
	OBMW17
	OBM13
	LMW12
	LMW14
	LMW15
	LMW16
	OBDM1
	OBDM7-2
	OBDM14
	OBDM16
	OBDM17
	OBDM18
	OBMUW1
	OBMUW6
	OBMUW15
	OBMUW16
	OBMUW17
	OBMUW18
	OBMUW20
	OBMW4
	OBMW7
	OBMW11
	OBMW15
	Amino Acid
	LMW11
	OBDM11
	OBMW9
	LMW1
	LMW2
	LMW3
	LMW4
	LMW6
	LMW7
	LMW8
	OBDM7
	OBDM10
	OBDM12
	OBDM15
	OBDM6
	OBMUW11
	OBMUW12
	OBMUW13
	OBMW1
	OBMW2
	OBMW3
	OBMW6
	OBMW8
	OBMW10
	OBMW13
	OBMW14
	OBMW16
	OBMW18
	OBMW19
	OBMW12
	OBMW17
	OBM13
	LMW12
	LMW14
	LMW15
	LMW16
	OBDM1
	OBDM7-2
	OBDM14
	OBDM16
	OBDM17
	OBDM18
	OBMUW1
	OBMUW6
	OBMUW15
	OBMUW16
	OBMUW17
	OBMUW18
	OBMUW20
	OBMW4
	OBMW7
	OBMW11
	OBMW15
	Amino Acid
	LMW11
	OBDM11
	OBMW9
	LMW1
	LMW2
	LMW3
	LMW4
	LMW6
	LMW7
	LMW8
	OBDM7
	OBDM10
	OBDM12
	OBDM15
	OBDM6
	OBMUW11
	OBMUW12
	OBMUW13
	OBMW1
	OBMW2
	OBMW3
	OBMW6
	OBMW8
	OBMW10
	OBMW13
	OBMW14
	OBMW16
	OBMW18
	OBMW19
	OBMW12
	OBMW17
	OBM13
	LMW12
	LMW14
	LMW15
	LMW16
	OBDM1
	OBDM7-2
	OBDM14
	OBDM16
	OBDM17
	OBDM18
	OBMUW1
	OBMUW6
	OBMUW15
	OBMUW16
	OBMUW17
	OBMUW18
	OBMUW20
	OBMW4
	OBMW7
	OBMW11
	OBMW15
	Amino Acid
	LMW11
	OBDM11
	OBMW9
	LMW1
	LMW2
	LMW3
	LMW4
	LMW6
	LMW7
	LMW8
	OBDM7
	OBDM10
	OBDM12
	OBDM15
	OBDM6
	OBMUW11
	OBMUW12
	OBMUW13
	OBMW1
	OBMW2
	OBMW3
	OBMW6
	OBMW8
	OBMW10
	OBMW13
	OBMW14
	OBMW16
	OBMW18
	OBMW19
	OBMW12
	OBMW17
	OBM13
	LMW12
	LMW14
	LMW15
	LMW16
	OBDM1
	OBDM7-2
	OBDM14
	OBDM16
	OBDM17
	OBDM18
	OBMUW1
	OBMUW6
	OBMUW15
	OBMUW16
	OBMUW17
	OBMUW18
	OBMUW20
	OBMW4
	OBMW7
	OBMW11
	OBMW15
	Amino Acid
	LMW11
	OBDM11
	OBMW9
	LMW1
	LMW2
	LMW3
	LMW4
	LMW6
	LMW7
	LMW8
	OBDM7
	OBDM10
	OBDM12
	OBDM15
	OBDM6
	OBMUW11
	OBMUW12
	OBMUW13
	OBMW1
	OBMW2
	OBMW3
	OBMW6
	OBMW8
	OBMW10
	OBMW13
	OBMW14
	OBMW16
	OBMW18
	OBMW19
	OBMW12
	OBMW17
	OBM13
	LMW12
	LMW14
	LMW15
	LMW16
	OBDM1
	OBDM7-2
	OBDM14
	OBDM16
	OBDM17
	OBDM18
	OBMUW1
	OBMUW6
	OBMUW15
	OBMUW16
	OBMUW17
	OBMUW18
	OBMUW20
	OBMW4
	OBMW7
	OBMW11
	OBMW15
	Amino Acid
	LMW11
	OBDM11
	OBMW9
	LMW1
	LMW2
	LMW3
	LMW4
	LMW6
	LMW7
	LMW8
	OBDM7
	OBDM10
	OBDM12
	OBDM15
	OBDM6
	OBMUW11
	OBMUW12
	OBMUW13
	OBMW1
	OBMW2
	OBMW3
	OBMW6
	OBMW8
	OBMW10
	OBMW13
	OBMW14
	OBMW16
	OBMW18
	OBMW19
	OBMW12
	OBMW17
	OBM13
	LMW12
	LMW14
	LMW15
	LMW16
	OBDM1
	OBDM7-2
	OBDM14
	OBDM16
	OBDM17
	OBDM18
	OBMUW1
	OBMUW6
	OBMUW15
	OBMUW16
	OBMUW17
	OBMUW18
	OBMUW20
	OBMW4
	OBMW7
	OBMW11
	OBMW15
	Amino Acid
	LMW11
	OBDM11
	OBMW9
	LMW1
	LMW2
	LMW3
	LMW4
	LMW6
	LMW7
	LMW8
	OBDM7
	OBDM10
	OBDM12
	OBDM15
	OBDM6
	OBMUW11
	OBMUW12
	OBMUW13
	OBMW1
	OBMW2
	OBMW3
	OBMW6
	OBMW8
	OBMW10
	OBMW13
	OBMW14
	OBMW16
	OBMW18
	OBMW19
	OBMW12
	OBMW17
	OBM13
	LMW12
	LMW14
	LMW15
	LMW16
	OBDM1
	OBDM7-2
	OBDM14
	OBDM16
	OBDM17
	OBDM18
	OBMUW1
	OBMUW6
	OBMUW15
	OBMUW16
	OBMUW17
	OBMUW18
	OBMUW20
	OBMW4
	OBMW7
	OBMW11
	OBMW15
	Amino Acid
	LMW11
	OBDM11
	OBMW9
	LMW1
	LMW2
	LMW3
	LMW4
	LMW6
	LMW7
	LMW8
	OBDM7
	OBDM10
	OBDM12
	OBDM15
	OBDM6
	OBMUW11
	OBMUW12
	OBMUW13
	OBMW1
	OBMW2
	OBMW3
	OBMW6
	OBMW8
	OBMW10
	OBMW13
	OBMW14
	OBMW16
	OBMW18
	OBMW19
	OBMW12
	OBMW17
	OBM13
	LMW12
	LMW14
	LMW15
	LMW16
	OBDM1
	OBDM7-2
	OBDM14
	OBDM16
	OBDM17
	OBDM18
	OBMUW1
	OBMUW6
	OBMUW15
	OBMUW16
	OBMUW17
	OBMUW18
	OBMUW20
	OBMW4
	OBMW7
	OBMW11
	OBMW15
	Amino Acid
	LMW11
	OBDM11
	OBMW9
	LMW1
	LMW2
	LMW3
	LMW4
	LMW6
	LMW7
	LMW8
	OBDM7
	OBDM10
	OBDM12
	OBDM15
	OBDM6
	OBMUW11
	OBMUW12
	OBMUW13
	OBMW1
	OBMW2
	OBMW3
	OBMW6
	OBMW8
	OBMW10
	OBMW13
	OBMW14
	OBMW16
	OBMW18
	OBMW19
	OBMW12
	OBMW17
	OBM13
	LMW12
	LMW14
	LMW15
	LMW16
	OBDM1
	OBDM7-2
	OBDM14
	OBDM16
	OBDM17
	OBDM18
	OBMUW1
	OBMUW6
	OBMUW15
	OBMUW16
	OBMUW17
	OBMUW18
	OBMUW20
	OBMW4
	OBMW7
	OBMW11
	OBMW15
	Amino Acid
	LMW11
	OBDM11
	OBMW9
	LMW1
	LMW2
	LMW3
	LMW4
	LMW6
	LMW7
	LMW8
	OBDM7
	OBDM10
	OBDM12
	OBDM15
	OBDM6
	OBMUW11
	OBMUW12
	OBMUW13
	OBMW1
	OBMW2
	OBMW3
	OBMW6
	OBMW8
	OBMW10
	OBMW13
	OBMW14
	OBMW16
	OBMW18
	OBMW19
	OBMW12
	OBMW17
	OBM13
	LMW12
	LMW14
	LMW15
	LMW16
	OBDM1
	OBDM7-2
	OBDM14
	OBDM16
	OBDM17
	OBDM18
	OBMUW1
	OBMUW6
	OBMUW15
	OBMUW16
	OBMUW17
	OBMUW18
	OBMUW20
	OBMW4
	OBMW7
	OBMW11
	OBMW15
	Amino Acid
	LMW11
	OBDM11
	OBMW9
	LMW1
	LMW2
	LMW3
	LMW4
	LMW6
	LMW7
	LMW8
	OBDM7
	OBDM10
	OBDM12
	OBDM15
	OBDM6
	OBMUW11
	OBMUW12
	OBMUW13
	OBMW1
	OBMW2
	OBMW3
	OBMW6
	OBMW8
	OBMW10
	OBMW13
	OBMW14
	OBMW16
	OBMW18
	OBMW19
	OBMW12
	OBMW17
	OBM13
	LMW12
	LMW14
	LMW15
	LMW16
	OBDM1
	OBDM7-2
	OBDM14
	OBDM16
	OBDM17
	OBDM18
	OBMUW1
	OBMUW6
	OBMUW15
	OBMUW16
	OBMUW17
	OBMUW18
	OBMUW20
	OBMW4
	OBMW7
	OBMW11
	OBMW15
	Amino Acid
	LMW11
	OBDM11
	OBMW9
	LMW1
	LMW2
	LMW3
	LMW4
	LMW6
	LMW7
	LMW8
	OBDM7
	OBDM10
	OBDM12
	OBDM15
	OBDM6
	OBMUW11
	OBMUW12
	OBMUW13
	OBMW1
	OBMW2
	OBMW3
	OBMW6
	OBMW8
	OBMW10
	OBMW13
	OBMW14
	OBMW16
	OBMW18
	OBMW19
	OBMW12
	OBMW17
	OBM13
	LMW12
	LMW14
	LMW15
	LMW16
	OBDM1
	OBDM7-2
	OBDM14
	OBDM16
	OBDM17
	OBDM18
	OBMUW1
	OBMUW6
	OBMUW15
	OBMUW16
	OBMUW17
	OBMUW18
	OBMUW20
	OBMW4
	OBMW7
	OBMW11
	OBMW15
	Amino Acid
	LMW11
	OBDM11
	OBMW9
	LMW1
	LMW2
	LMW3
	LMW4
	LMW6
	LMW7
	LMW8
	OBDM7
	OBDM10
	OBDM12
	OBDM15
	OBDM6
	OBMUW11
	OBMUW12
	OBMUW13
	OBMW1
	OBMW2
	OBMW3
	OBMW6
	OBMW8
	OBMW10
	OBMW13
	OBMW14
	OBMW16
	OBMW18
	OBMW19
	OBMW12
	OBMW17
	OBM13
	LMW12
	LMW14
	LMW15
	LMW16
	OBDM1
	OBDM7-2
	OBDM14
	OBDM16
	OBDM17
	OBDM18
	OBMUW1
	OBMUW6
	OBMUW15
	OBMUW16
	OBMUW17
	OBMUW18
	OBMUW20
	OBMW4
	OBMW7
	OBMW11
	OBMW15
	Amino Acid
	LMW11
	OBDM11
	OBMW9
	LMW1
	LMW2
	LMW3
	LMW4
	LMW6
	LMW7
	LMW8
	OBDM7
	OBDM10
	OBDM12
	OBDM15
	OBDM6
	OBMUW11
	OBMUW12
	OBMUW13
	OBMW1
	OBMW2
	OBMW3
	OBMW6
	OBMW8
	OBMW10
	OBMW13
	OBMW14
	OBMW16
	OBMW18
	OBMW19
	OBMW12
	OBMW17
	OBM13
	LMW12
	LMW14
	LMW15
	LMW16
	OBDM1
	OBDM7-2
	OBDM14
	OBDM16
	OBDM17
	OBDM18
	OBMUW1
	OBMUW6
	OBMUW15
	OBMUW16
	OBMUW17
	OBMUW18
	OBMUW20
	OBMW4
	OBMW7
	OBMW11
	OBMW15
	Amino Acid
	LMW11
	OBDM11
	OBMW9
	LMW1
	LMW2
	LMW3
	LMW4
	LMW6
	LMW7
	LMW8
	OBDM7
	OBDM10
	OBDM12
	OBDM15
	OBDM6
	OBMUW11
	OBMUW12
	OBMUW13
	OBMW1
	OBMW2
	OBMW3
	OBMW6
	OBMW8
	OBMW10
	OBMW13
	OBMW14
	OBMW16
	OBMW18
	OBMW19
	OBMW12
	OBMW17
	OBM13
	LMW12
	LMW14
	LMW15
	LMW16
	OBDM1
	OBDM7-2
	OBDM14
	OBDM16
	OBDM17
	OBDM18
	OBMUW1
	OBMUW6
	OBMUW15
	OBMUW16
	OBMUW17
	OBMUW18
	OBMUW20
	OBMW4
	OBMW7
	OBMW11
	OBMW15
	Amino Acid
	LMW11
	OBDM11
	OBMW9
	LMW1
	LMW2
	LMW3
	LMW4
	LMW6
	LMW7
	LMW8
	OBDM7
	OBDM10
	OBDM12
	OBDM15
	OBDM6
	OBMUW11
	OBMUW12
	OBMUW13
	OBMW1
	OBMW2
	OBMW3
	OBMW6
	OBMW8
	OBMW10
	OBMW13
	OBMW14
	OBMW16
	OBMW18
	OBMW19
	OBMW12
	OBMW17
	OBM13
	LMW12
	LMW14
	LMW15
	LMW16
	OBDM1
	OBDM7-2
	OBDM14
	OBDM16
	OBDM17
	OBDM18
	OBMUW1
	OBMUW6
	OBMUW15
	OBMUW16
	OBMUW17
	OBMUW18
	OBMUW20
	OBMW4
	OBMW7
	OBMW11
	OBMW15
	Amino Acid
	LMW11
	OBDM11
	OBMW9
	LMW1
	LMW2
	LMW3
	LMW4
	LMW6
	LMW7
	LMW8
	OBDM7
	OBDM10
	OBDM12
	OBDM15
	OBDM6
	OBMUW11
	OBMUW12
	OBMUW13
	OBMW1
	OBMW2
	OBMW3
	OBMW6
	OBMW8
	OBMW10
	OBMW13
	OBMW14
	OBMW16
	OBMW18
	OBMW19
	OBMW12
	OBMW17
	OBM13
	LMW12
	LMW14
	LMW15
	LMW16
	OBDM1
	OBDM7-2
	OBDM14
	OBDM16
	OBDM17
	OBDM18
	OBMUW1
	OBMUW6
	OBMUW15
	OBMUW16
	OBMUW17
	OBMUW18
	OBMUW20
	OBMW4
	OBMW7
	OBMW11
	OBMW15
	Amino Acid
	LMW11
	OBDM11
	OBMW9
	LMW1
	LMW2
	LMW3
	LMW4
	LMW6
	LMW7
	LMW8
	OBDM7
	OBDM10
	OBDM12
	OBDM15
	OBDM6
	OBMUW11
[truncated: 1,495 more rows]

## Sheet: Homocysteine
Sample	uM/L
LMW1	7.5
LMW2	10.1
LMW3	5.6
LMW4	10.7
LMW21	9.5
LMW22	9.3
LMW5	8.6
LMW6	8.8
LMW7	6.2
LMW8	12.4
LMW10	17.1
LMW12	5.1
LMW13	8.5
LMW14	14.7
LMW15	8.1
LMW26	5.1
LMW16	9.8
LMW17	7.05
LMW18	10.9
LMW19	9.8
LMW20	9.4
OBMW21	10.9
OBMW22	11.4
OBMUW7-2	10.1
OBDM5-2	13.3
OBMW4	8
OBMW6	9.5
OBMW9	8.3
OBMW10
OBMW23	5.9
OBMW24	7.2
OBMW25	9.8
OBMW12	8.1
OBMW13	7.9
OBMW14	13.4
OBMW15-2	10.3
OBMW26	9.1
OBMW27	10.4
OBMW28	7.65
OBMUW4	7.9
OBMUW5	12.7
OBMUW6	9.1
OBMUW8-2	13
OBMUW9	10.3
OBMUW10	9.1
OBMUW14
OBMUW18	7.6
OBMUW19	13.7
OBMUW20	8.2
OBDM2-2	8.4
OBDM4-2	14.5
OBDM7-2	9.4
OBDM19-2
OBDM20-2	13.4
LMW9-2	9
LMW11	13.1
LMW23	8.2
OBMW2	14.6
OBMW3	10.5
OBMW7	10.7
OBMW8	6.5
OBMW16	11.8
OBMW18
OBMUW2-2	8.9
OBMUW3	6.8
OBMUW15	11.9
OBDMUW16	19.6
OBDM8-2	9.2
OBDM9-2	8.9
OBDM10-2	10.1
OBDM12	8.1
OBDM13	7.2
OBDM14	10.4
OBDM26-2	12.8
OBDM16-2	12
OBDM17	14.9
OBMW17-2	8
OBMW20	4.6
OBMUW1	10.1
OBMUW11	7
OBMUW12-2	9.6
OBMUW13	9.8
OBDM3-22	7.65
OBDM6-2	14
OBMW1	11
OBMW19	13
OBMUW17	12.6
OBDM15-2	13.8
OBDM18
OBDM1	13.8

## Sheet: AA Storage
Amino Acid	PSER	TAU2	ASP2	HYP2	THR2	SER2	ASN2	GLU2	GLN2	SAR	AAD	PRO2	GLY2	ALA2	CIT2	ABU	VAL2	MET2	ALLISO	CYS2	ILE2	LEU2	TYR2	PHE2	BALA2	BABA	GBA	HCY	ETN	TRP2	HYL	ORN2	LYS2	1MHIS	HIS2	3MHIS	ANSP	CARSN	ARG2
S1P2	0	38.759	3.466	5.684	96.246	91.435	47.994	47.817	576.044	0	0.415	210.756	270.91	571.115	32.105	13.38	199.333	23.136	1.581	7.13	62.874	129.441	59.156	54.281	9.29	0.777	0	0	10.645	45.909	0	39.869	127.485	4.618	74.836	28.468	0	9.624	66.225
S1P3	0	37.385	3.929	5.575	93.917	88.912	45.467	51.482	557.267	0.963	0	206.432	266.994	556.015	31.341	13.133	194.341	22.7	1.513	4.68	61.442	126.56	57.645	53.832	8.927	0	0	0	10.519	45.21	0	39.188	125.249	4.486	73.412	27.728	0	8.81	67.972
S1P5	0	38.672	5.34	5.814	97.148	98.682	45.868	62.429	560.574	0	0	215.552	280.612	576.652	32.319	13.495	200.774	23.705	1.583	6.157	63.025	130.175	59.798	57.038	9.683	1.192	0	0	11.12	46.282	0	42.27	136.013	4.754	76.793	28.723	0	9.226	81.779
S1P7	0	38.561	7.999	5.806	100.668	117.268	47.586	69.507	559.381	0.571	0	229.19	297.232	585.85	32.48	13.49	204.379	26.172	1.632	6.017	68.143	138.662	61.942	62.541	9.023	0.583	0	0	12.712	47.244	0.536	44.781	164.908	4.813	82.403	29.286	0	7.963	135.57
S1D0	0	37.157	1.727	5.375	96.665	90.776	50.237	0	611.77	0	0	208.737	273.854	572.272	25.13	13.347	199.511	22.745	1.651	43.258	61.527	128.064	56.598	53.627	0	0.979	0.309	0	8.591	46.167	0	37.283	127.97	5.214	75.308	27.915	0	5.569	61.829
S1CB1	0	60.629	4.034	5.572	95.53	94.264	48.35	0	597.232	0	0.313	210.16	277.395	570.226	45.781	13.428	199.223	22.774	1.639	54.719	60.884	129.182	55.646	53.968	0	0.979	0.391	0.096	9.764	47.558	0	40.619	128.362	5.203	75.055	28.724	0	5.564	64.538
S1CB2	0	100.957	7.963	5.729	93.029	98.999	45.409	107.82	523.247	0	0	208.545	267.065	559.083	31.952	13.014	195.405	23.287	1.522	4.474	60.558	129.245	56.778	54.721	10.383	0.388	0.228	0	13.962	46.061	0	43.374	128.547	4.439	73.169	28.044	0	5.381	71.192
S1CB3	0	144.189	10.526	5.84	104.584	106.489	52.158	92.657	564.133	0.32	0	218.394	287.913	587.101	32.26	13.366	205.581	26.745	2.157	6.518	68.97	142.722	62.646	60.348	12.721	0	0	0.383	18.041	48.519	0.085	41.982	139.379	4.569	78.922	28.691	0	6.873	82.21
S1CB5	8.226	157.85	14.999	5.833	109.192	113.389	53.222	106.413	564.883	0	0.319	228.198	309.973	610.619	33.534	13.816	214.614	29.089	1.595	5.139	70.377	150.179	65.644	63.308	13.513	0	0	0.174	20.706	50.328	0	50.584	148.6	4.682	81.384	29.581	0	6.6	81.223
S1CB7	6.086	166.805	21.038	5.76	105.204	128.86	48.354	150.085	511.728	0	0	231.791	311.456	593.111	33.803	13.304	210.643	29.794	1.672	7.289	69.634	148.596	62.35	63.799	12.52	1.248	0	0	21.385	49.957	0	60.001	172.349	4.503	81.001	29.546	0	5.237	119.479
S1P1	0	38.2	2.381	5.491	96.622	91.282	49.983	28.879	609.671	0	0.389	210.855	282.223	574.367	32.52	13.483	200.905	23.001	1.676	53.553	62.333	129.868	57.248	54.44	9.295	1.008	0	0	9.434	46.392	0	38.665	129.439	5.276	75.489	28.256	0	7.018	62.238
S2P0	0	47.196	2.004	10.644	155.128	116.587	50.086	46.411	574.328	1.459	1.078	188.696	289.27	534.062	37.003	27.037	253.587	24.672	1.525	20.421	58.946	126.013	55.904	54.395	5.79	1.373	0	0	8.029	51.485	0	56.915	189.131	7.062	71.246	43.65	0	5.511	95.946
S2CB1	0	78.153	3.84	10.396	149.667	113.784	47.787	54.957	549.399	0.955	1.097	183.537	283.276	517.286	35.828	26.128	245.129	23.957	1.435	14.301	57.056	123.42	53.626	52.751	6.071	1.366	0.466	0	9.08	50.201	0	56.095	182.445	6.827	68.834	42.344	0	5.874	92.811
S2CB2	0	134.883	7.779	10.606	152.838	125.385	48.753	68.536	554.511	0.637	1.142	192.481	297.432	530.079	36.343	26.769	250.678	26.858	1.529	15.19	60.807	131.325	55.446	56.125	7.243	1.419	0.445	0.274	12.01	53.146	0.161	58.568	208.296	6.94	71.741	43.091	0	5.705	143.04
S2CB3	0	156.084	11.326	10.199	149.05	123.214	48.157	77.797	524.599	0.143	1.076	184.413	287.438	510.085	34.449	24.928	240.886	26.931	1.435	15.265	59.488	129.832	55.389	55.675	7.481	1.269	0.371	0.077	14.694	50.585	0.083	55.842	192.051	6.539	69.2	40.867	0	5.328	118.46
S2CB5	0	188.243	16.584	10.316	154.536	128.38	49.834	95.022	518.661	0.941	1.068	187.212	295.621	518.146	34.446	25.096	244.938	28.521	1.37	14.284	61.923	135.824	57.208	57.811	8.113	1.317	0	0.019	19.517	51.246	0.08	57.982	187.542	6.62	70.057	40.738	0	5.354	99.88
S2CB7	0	222.432	24.03	11.59	174.968	149.326	54.963	117.578	555.467	1.122	1.242	211.945	335.586	583.4	38.424	27.933	275.273	32.716	1.55	20.101	71.621	155.971	64.043	66.742	9.3	1.494	0	0.444	23.212	58.141	0	69.745	214.752	7.338	79.727	46.004	0	4.721	113.945
S2P1	0	47.886	2.626	10.906	156.427	118.495	50.171	49.472	578.222	0.523	1.147	191.93	296.56	542.679	37.636	27.53	257.502	24.998	1.543	21.917	59.734	128.081	57.362	55.272	5.878	1.449	0.453	0.07	8.337	52.121	0.114	58.049	192.23	7.161	72.541	44.339	0	7.088	97.429
S2P2	0	49.095	3.163	11.235	159.902	121.174	50.557	51.986	588.316	0.643	1.212	195.908	304.152	553.972	38.458	28.094	262.908	25.555	1.557	18.172	61.142	130.818	57.958	56.578	6.099	1.424	0.363	0	8.624	53.738	0	59.607	196.766	7.354	74.22	45.29	0	7.374	99.556
S2P3	0	48.689	3.741	10.985	155.526	118.591	48.442	53.291	566.873	0.663	1.144	190.748	302.915	539.196	37.456	27.314	255.662	24.923	1.508	17.452	59.407	127.126	57.018	55.103	5.913	1.533	0.443	0	8.614	52.366	0	58.56	191.213	7.175	72.278	43.937	0	7.438	96.341
S2P5	0	48.222	4.531	11.178	157.616	120.771	47.851	60.61	568.59	0.433	1.196	194.332	305.584	547.41	38.019	27.766	260.518	25.285	1.543	16.894	60.712	129.954	57.022	56.164	5.917	1.471	0.092	0.136	8.653	53.129	0	60.424	194.59	7.335	73.613	44.836	0	7.26	97.651
S2P7	0	46.489	5.493	10.792	153.606	127.212	44.967	61.912	541.727	0	1.106	187.32	301.386	531.279	40.385	26.632	251.103	24.414	1.48	18.13	58.911	125.392	55.24	54.191	5.796	1.432	0	0.072	8.491	51.438	0	59.084	188.14	7.07	73.338	43.343	0	6.407	94.856
Amino Acid	PSER	TAU2	ASP2	HYP2	THR2	SER2	ASN2	GLU2	GLN2	SAR	AAD	PRO2	GLY2	ALA2	CIT2	ABU	VAL2	MET2	ALLISO	CYS2	ILE2	LEU2	TYR2	PHE2	BALA2	BABA	GBA	HCY	ETN	TRP2	HYL	ORN2	LYS2	1MHIS	HIS2	3MHIS	ANSP	CARSN	ARG2
NMP2	0	38.759	3.466	5.684	96.246	91.435	47.994	47.817	576.044	0	0.415	210.756	270.91	571.115	32.105	13.38	199.333	23.136	1.581	7.13	62.874	129.441	59.156	54.281	9.29	0.777	0	0	10.645	45.909	0	39.869	127.485	4.618	74.836	28.468	0	9.624	66.225
NMP3	0	37.385	3.929	5.575	93.917	88.912	45.467	51.482	557.267	0.963	0	206.432	266.994	556.015	31.341	13.133	194.341	22.7	1.513	4.68	61.442	126.56	57.645	53.832	8.927	0	0	0	10.519	45.21	0	39.188	125.249	4.486	73.412	27.728	0	8.81	67.972
NMP5	0	38.672	5.34	5.814	97.148	98.682	45.868	62.429	560.574	0	0	215.552	280.612	576.652	32.319	13.495	200.774	23.705	1.583	6.157	63.025	130.175	59.798	57.038	9.683	1.192	0	0	11.12	46.282	0	42.27	136.013	4.754	76.793	28.723	0	9.226	81.779
NMP7	0	38.561	7.999	5.806	100.668	117.268	47.586	69.507	559.381	0.571	0	229.19	297.232	585.85	32.48	13.49	204.379	26.172	1.632	6.017	68.143	138.662	61.942	62.541	9.023	0.583	0	0	12.712	47.244	0.536	44.781	164.908	4.813	82.403	29.286	0	7.963	135.57
NMD0	0	37.157	1.727	5.375	96.665	90.776	50.237	0	611.77	0	0	208.737	273.854	572.272	25.13	13.347	199.511	22.745	1.651	43.258	61.527	128.064	56.598	53.627	0	0.979	0.309	0	8.591	46.167	0	37.283	127.97	5.214	75.308	27.915	0	5.569	61.829
NMCB1	0	60.629	4.034	5.572	95.53	94.264	48.35	0	597.232	0	0.313	210.16	277.395	570.226	45.781	13.428	199.223	22.774	1.639	54.719	60.884	129.182	55.646	53.968	0	0.979	0.391	0.096	9.764	47.558	0	40.619	128.362	5.203	75.055	28.724	0	5.564	64.538
NMCB2	0	100.957	7.963	5.729	93.029	98.999	45.409	107.82	523.247	0	0	208.545	267.065	559.083	31.952	13.014	195.405	23.287	1.522	4.474	60.558	129.245	56.778	54.721	10.383	0.388	0.228	0	13.962	46.061	0	43.374	128.547	4.439	73.169	28.044	0	5.381	71.192
NMCB3	0	144.189	10.526	5.84	104.584	106.489	52.158	92.657	564.133	0.32	0	218.394	287.913	587.101	32.26	13.366	205.581	26.745	2.157	6.518	68.97	142.722	62.646	60.348	12.721	0	0	0.383	18.041	48.519	0.085	41.982	139.379	4.569	78.922	28.691	0	6.873	82.21
NMCB5	8.226	157.85	14.999	5.833	109.192	113.389	53.222	106.413	564.883	0	0.319	228.198	309.973	610.619	33.534	13.816	214.614	29.089	1.595	5.139	70.377	150.179	65.644	63.308	13.513	0	0	0.174	20.706	50.328	0	50.584	148.6	4.682	81.384	29.581	0	6.6	81.223
NMCB7	6.086	166.805	21.038	5.76	105.204	128.86	48.354	150.085	511.728	0	0	231.791	311.456	593.111	33.803	13.304	210.643	29.794	1.672	7.289	69.634	148.596	62.35	63.799	12.52	1.248	0	0	21.385	49.957	0	60.001	172.349	4.503	81.001	29.546	0	5.237	119.479
NMP1	0	38.2	2.381	5.491	96.622	91.282	49.983	28.879	609.671	0	0.389	210.855	282.223	574.367	32.52	13.483	200.905	23.001	1.676	53.553	62.333	129.868	57.248	54.44	9.295	1.008	0	0	9.434	46.392	0	38.665	129.439	5.276	75.489	28.256	0	7.018	62.238
QAP0	0	47.196	2.004	10.644	155.128	116.587	50.086	46.411	574.328	1.459	1.078	188.696	289.27	534.062	37.003	27.037	253.587	24.672	1.525	20.421	58.946	126.013	55.904	54.395	5.79	1.373	0	0	8.029	51.485	0	56.915	189.131	7.062	71.246	43.65	0	5.511	95.946
QACB1	0	78.153	3.84	10.396	149.667	113.784	47.787	54.957	549.399	0.955	1.097	183.537	283.276	517.286	35.828	26.128	245.129	23.957	1.435	14.301	57.056	123.42	53.626	52.751	6.071	1.366	0.466	0	9.08	50.201	0	56.095	182.445	6.827	68.834	42.344	0	5.874	92.811
QACB2	0	134.883	7.779	10.606	152.838	125.385	48.753	68.536	554.511	0.637	1.142	192.481	297.432	530.079	36.343	26.769	250.678	26.858	1.529	15.19	60.807	131.325	55.446	56.125	7.243	1.419	0.445	0.274	12.01	53.146	0.161	58.568	208.296	6.94	71.741	43.091	0	5.705	143.04
QACB3	0	156.084	11.326	10.199	149.05	123.214	48.157	77.797	524.599	0.143	1.076	184.413	287.438	510.085	34.449	24.928	240.886	26.931	1.435	15.265	59.488	129.832	55.389	55.675	7.481	1.269	0.371	0.077	14.694	50.585	0.083	55.842	192.051	6.539	69.2	40.867	0	5.328	118.46
QACB5	0	188.243	16.584	10.316	154.536	128.38	49.834	95.022	518.661	0.941	1.068	187.212	295.621	518.146	34.446	25.096	244.938	28.521	1.37	14.284	61.923	135.824	57.208	57.811	8.113	1.317	0	0.019	19.517	51.246	0.08	57.982	187.542	6.62	70.057	40.738	0	5.354	99.88
QACB7	0	222.432	24.03	11.59	174.968	149.326	54.963	117.578	555.467	1.122	1.242	211.945	335.586	583.4	38.424	27.933	275.273	32.716	1.55	20.101	71.621	155.971	64.043	66.742	9.3	1.494	0	0.444	23.212	58.141	0	69.745	214.752	7.338	79.727	46.004	0	4.721	113.945
QAP1	0	47.886	2.626	10.906	156.427	118.495	50.171	49.472	578.222	0.523	1.147	191.93	296.56	542.679	37.636	27.53	257.502	24.998	1.543	21.917	59.734	128.081	57.362	55.272	5.878	1.449	0.453	0.07	8.337	52.121	0.114	58.049	192.23	7.161	72.541	44.339	0	7.088	97.429
QAP2	0	49.095	3.163	11.235	159.902	121.174	50.557	51.986	588.316	0.643	1.212	195.908	304.152	553.972	38.458	28.094	262.908	25.555	1.557	18.172	61.142	130.818	57.958	56.578	6.099	1.424	0.363	0	8.624	53.738	0	59.607	196.766	7.354	74.22	45.29	0	7.374	99.556
QAP3	0	48.689	3.741	10.985	155.526	118.591	48.442	53.291	566.873	0.663	1.144	190.748	302.915	539.196	37.456	27.314	255.662	24.923	1.508	17.452	59.407	127.126	57.018	55.103	5.913	1.533	0.443	0	8.614	52.366	0	58.56	191.213	7.175	72.278	43.937	0	7.438	96.341
QAP5	0	48.222	4.531	11.178	157.616	120.771	47.851	60.61	568.59	0.433	1.196	194.332	305.584	547.41	38.019	27.766	260.518	25.285	1.543	16.894	60.712	129.954	57.022	56.164	5.917	1.471	0.092	0.136	8.653	53.129	0	60.424	194.59	7.335	73.613	44.836	0	7.26	97.651
QAP7	0	46.489	5.493	10.792	153.606	127.212	44.967	61.912	541.727	0	1.106	187.32	301.386	531.279	40.385	26.632	251.103	24.414	1.48	18.13	58.911	125.392	55.24	54.191	5.796	1.432	0	0.072	8.491	51.438	0	59.084	188.14	7.07	73.338	43.343	0	6.407	94.856
Amino Acid	PSER	TAU2	ASP2	HYP2	THR2	SER2	ASN2	GLU2	GLN2	SAR	AAD	PRO2	GLY2	ALA2	CIT2	ABU	VAL2	MET2	ALLISO	CYS2	ILE2	LEU2	TYR2	PHE2	BALA2	BABA	GBA	HCY	ETN	TRP2	HYL	ORN2	LYS2	1MHIS	HIS2	3MHIS	ANSP	CARSN	ARG2
NMP2	0	38.759	3.466	5.684	96.246	91.435	47.994	47.817	576.044	0	0.415	210.756	270.91	571.115	32.105	13.38	199.333	23.136	1.581	7.13	62.874	129.441	59.156	54.281	9.29	0.777	0	0	10.645	45.909	0	39.869	127.485	4.618	74.836	28.468	0	9.624	66.225
NMP3	0	37.385	3.929	5.575	93.917	88.912	45.467	51.482	557.267	0.963	0	206.432	266.994	556.015	31.341	13.133	194.341	22.7	1.513	4.68	61.442	126.56	57.645	53.832	8.927	0	0	0	10.519	45.21	0	39.188	125.249	4.486	73.412	27.728	0	8.81	67.972
NMP5	0	38.672	5.34	5.814	97.148	98.682	45.868	62.429	560.574	0	0	215.552	280.612	576.652	32.319	13.495	200.774	23.705	1.583	6.157	63.025	130.175	59.798	57.038	9.683	1.192	0	0	11.12	46.282	0	42.27	136.013	4.754	76.793	28.723	0	9.226	81.779
NMP7	0	38.561	7.999	5.806	100.668	117.268	47.586	69.507	559.381	0.571	0	229.19	297.232	585.85	32.48	13.49	204.379	26.172	1.632	6.017	68.143	138.662	61.942	62.541	9.023	0.583	0	0	12.712	47.244	0.536	44.781	164.908	4.813	82.403	29.286	0	7.963	135.57
NMD0	0	37.157	1.727	5.375	96.665	90.776	50.237	0	611.77	0	0	208.737	273.854	572.272	25.13	13.347	199.511	22.745	1.651	43.258	61.527	128.064	56.598	53.627	0	0.979	0.309	0	8.591	46.167	0	37.283	127.97	5.214	75.308	27.915	0	5.569	61.829
NMCB1	0	60.629	4.034	5.572	95.53	94.264	48.35	0	597.232	0	0.313	210.16	277.395	570.226	45.781	13.428	199.223	22.774	1.639	54.719	60.884	129.182	55.646	53.968	0	0.979	0.391	0.096	9.764	47.558	0	40.619	128.362	5.203	75.055	28.724	0	5.564	64.538
NMCB2	0	100.957	7.963	5.729	93.029	98.999	45.409	107.82	523.247	0	0	208.545	267.065	559.083	31.952	13.014	195.405	23.287	1.522	4.474	60.558	129.245	56.778	54.721	10.383	0.388	0.228	0	13.962	46.061	0	43.374	128.547	4.439	73.169	28.044	0	5.381	71.192
NMCB3	0	144.189	10.526	5.84	104.584	106.489	52.158	92.657	564.133	0.32	0	218.394	287.913	587.101	32.26	13.366	205.581	26.745	2.157	6.518	68.97	142.722	62.646	60.348	12.721	0	0	0.383	18.041	48.519	0.085	41.982	139.379	4.569	78.922	28.691	0	6.873	82.21
NMCB5	8.226	157.85	14.999	5.833	109.192	113.389	53.222	106.413	564.883	0	0.319	228.198	309.973	610.619	33.534	13.816	214.614	29.089	1.595	5.139	70.377	150.179	65.644	63.308	13.513	0	0	0.174	20.706	50.328	0	50.584	148.6	4.682	81.384	29.581	0	6.6	81.223
NMCB7	6.086	166.805	21.038	5.76	105.204	128.86	48.354	150.085	511.728	0	0	231.791	311.456	593.111	33.803	13.304	210.643	29.794	1.672	7.289	69.634	148.596	62.35	63.799	12.52	1.248	0	0	21.385	49.957	0	60.001	172.349	4.503	81.001	29.546	0	5.237	119.479
NMP1	0	38.2	2.381	5.491	96.622	91.282	49.983	28.879	609.671	0	0.389	210.855	282.223	574.367	32.52	13.483	200.905	23.001	1.676	53.553	62.333	129.868	57.248	54.44	9.295	1.008	0	0	9.434	46.392	0	38.665	129.439	5.276	75.489	28.256	0	7.018	62.238
QAP0	0	47.196	2.004	10.644	155.128	116.587	50.086	46.411	574.328	1.459	1.078	188.696	289.27	534.062	37.003	27.037	253.587	24.672	1.525	20.421	58.946	126.013	55.904	54.395	5.79	1.373	0	0	8.029	51.485	0	56.915	189.131	7.062	71.246	43.65	0	5.511	95.946
QACB1	0	78.153	3.84	10.396	149.667	113.784	47.787	54.957	549.399	0.955	1.097	183.537	283.276	517.286	35.828	26.128	245.129	23.957	1.435	14.301	57.056	123.42	53.626	52.751	6.071	1.366	0.466	0	9.08	50.201	0	56.095	182.445	6.827	68.834	42.344	0	5.874	92.811
QACB2	0	134.883	7.779	10.606	152.838	125.385	48.753	68.536	554.511	0.637	1.142	192.481	297.432	530.079	36.343	26.769	250.678	26.858	1.529	15.19	60.807	131.325	55.446	56.125	7.243	1.419	0.445	0.274	12.01	53.146	0.161	58.568	208.296	6.94	71.741	43.091	0	5.705	143.04
QACB3	0	156.084	11.326	10.199	149.05	123.214	48.157	77.797	524.599	0.143	1.076	184.413	287.438	510.085	34.449	24.928	240.886	26.931	1.435	15.265	59.488	129.832	55.389	55.675	7.481	1.269	0.371	0.077	14.694	50.585	0.083	55.842	192.051	6.539	69.2	40.867	0	5.328	118.46
QACB5	0	188.243	16.584	10.316	154.536	128.38	49.834	95.022	518.661	0.941	1.068	187.212	295.621	518.146	34.446	25.096	244.938	28.521	1.37	14.284	61.923	135.824	57.208	57.811	8.113	1.317	0	0.019	19.517	51.246	0.08	57.982	187.542	6.62	70.057	40.738	0	5.354	99.88
QACB7	0	222.432	24.03	11.59	174.968	149.326	54.963	117.578	555.467	1.122	1.242	211.945	335.586	583.4	38.424	27.933	275.273	32.716	1.55	20.101	71.621	155.971	64.043	66.742	9.3	1.494	0	0.444	23.212	58.141	0	69.745	214.752	7.338	79.727	46.004	0	4.721	113.945
QAP1	0	47.886	2.626	10.906	156.427	118.495	50.171	49.472	578.222	0.523	1.147	191.93	296.56	542.679	37.636	27.53	257.502	24.998	1.543	21.917	59.734	128.081	57.362	55.272	5.878	1.449	0.453	0.07	8.337	52.121	0.114	58.049	192.23	7.161	72.541	44.339	0	7.088	97.429
QAP2	0	49.095	3.163	11.235	159.902	121.174	50.557	51.986	588.316	0.643	1.212	195.908	304.152	553.972	38.458	28.094	262.908	25.555	1.557	18.172	61.142	130.818	57.958	56.578	6.099	1.424	0.363	0	8.624	53.738	0	59.607	196.766	7.354	74.22	45.29	0	7.374	99.556
QAP3	0	48.689	3.741	10.985	155.526	118.591	48.442	53.291	566.873	0.663	1.144	190.748	302.915	539.196	37.456	27.314	255.662	24.923	1.508	17.452	59.407	127.126	57.018	55.103	5.913	1.533	0.443	0	8.614	52.366	0	58.56	191.213	7.175	72.278	43.937	0	7.438	96.341
QAP5	0	48.222	4.531	11.178	157.616	120.771	47.851	60.61	568.59	0.433	1.196	194.332	305.584	547.41	38.019	27.766	260.518	25.285	1.543	16.894	60.712	129.954	57.022	56.164	5.917	1.471	0.092	0.136	8.653	53.129	0	60.424	194.59	7.335	73.613	44.836	0	7.26	97.651
QAP7	0	46.489	5.493	10.792	153.606	127.212	44.967	61.912	541.727	0	1.106	187.32	301.386	531.279	40.385	26.632	251.103	24.414	1.48	18.13	58.911	125.392	55.24	54.191	5.796	1.432	0	0.072	8.491	51.438	0	59.084	188.14	7.07	73.338	43.343	0	6.407	94.856
Amino Acid	PSER	TAU2	ASP2	HYP2	THR2	SER2	ASN2	GLU2	GLN2	SAR	AAD	PRO2	GLY2	ALA2	CIT2	ABU	VAL2	MET2	ALLISO	CYS2	ILE2	LEU2	TYR2	PHE2	BALA2	BABA	GBA	HCY	ETN	TRP2	HYL	ORN2	LYS2	1MHIS	HIS2	3MHIS	ANSP	CARSN	ARG2
NMP2	0	38.759	3.466	5.684	96.246	91.435	47.994	47.817	576.044	0	0.415	210.756	270.91	571.115	32.105	13.38	199.333	23.136	1.581	7.13	62.874	129.441	59.156	54.281	9.29	0.777	0	0	10.645	45.909	0	39.869	127.485	4.618	74.836	28.468	0	9.624	66.225
NMP3	0	37.385	3.929	5.575	93.917	88.912	45.467	51.482	557.267	0.963	0	206.432	266.994	556.015	31.341	13.133	194.341	22.7	1.513	4.68	61.442	126.56	57.645	53.832	8.927	0	0	0	10.519	45.21	0	39.188	125.249	4.486	73.412	27.728	0	8.81	67.972
NMP5	0	38.672	5.34	5.814	97.148	98.682	45.868	62.429	560.574	0	0	215.552	280.612	576.652	32.319	13.495	200.774	23.705	1.583	6.157	63.025	130.175	59.798	57.038	9.683	1.192	0	0	11.12	46.282	0	42.27	136.013	4.754	76.793	28.723	0	9.226	81.779
NMP7	0	38.561	7.999	5.806	100.668	117.268	47.586	69.507	559.381	0.571	0	229.19	297.232	585.85	32.48	13.49	204.379	26.172	1.632	6.017	68.143	138.662	61.942	62.541	9.023	0.583	0	0	12.712	47.244	0.536	44.781	164.908	4.813	82.403	29.286	0	7.963	135.57
NMD0	0	37.157	1.727	5.375	96.665	90.776	50.237	0	611.77	0	0	208.737	273.854	572.272	25.13	13.347	199.511	22.745	1.651	43.258	61.527	128.064	56.598	53.627	0	0.979	0.309	0	8.591	46.167	0	37.283	127.97	5.214	75.308	27.915	0	5.569	61.829
NMCB1	0	60.629	4.034	5.572	95.53	94.264	48.35	0	597.232	0	0.313	210.16	277.395	570.226	45.781	13.428	199.223	22.774	1.639	54.719	60.884	129.182	55.646	53.968	0	0.979	0.391	0.096	9.764	47.558	0	40.619	128.362	5.203	75.055	28.724	0	5.564	64.538
NMCB2	0	100.957	7.963	5.729	93.029	98.999	45.409	107.82	523.247	0	0	208.545	267.065	559.083	31.952	13.014	195.405	23.287	1.522	4.474	60.558	129.245	56.778	54.721	10.383	0.388	0.228	0	13.962	46.061	0	43.374	128.547	4.439	73.169	28.044	0	5.381	71.192
NMCB3	0	144.189	10.526	5.84	104.584	106.489	52.158	92.657	564.133	0.32	0	218.394	287.913	587.101	32.26	13.366	205.581	26.745	2.157	6.518	68.97	142.722	62.646	60.348	12.721	0	0	0.383	18.041	48.519	0.085	41.982	139.379	4.569	78.922	28.691	0	6.873	82.21
NMCB5	8.226	157.85	14.999	5.833	109.192	113.389	53.222	106.413	564.883	0	0.319	228.198	309.973	610.619	33.534	13.816	214.614	29.089	1.595	5.139	70.377	150.179	65.644	63.308	13.513	0	0	0.174	20.706	50.328	0	50.584	148.6	4.682	81.384	29.581	0	6.6	81.223
NMCB7	6.086	166.805	21.038	5.76	105.204	128.86	48.354	150.085	511.728	0	0	231.791	311.456	593.111	33.803	13.304	210.643	29.794	1.672	7.289	69.634	148.596	62.35	63.799	12.52	1.248	0	0	21.385	49.957	0	60.001	172.349	4.503	81.001	29.546	0	5.237	119.479
NMP1	0	38.2	2.381	5.491	96.622	91.282	49.983	28.879	609.671	0	0.389	210.855	282.223	574.367	32.52	13.483	200.905	23.001	1.676	53.553	62.333	129.868	57.248	54.44	9.295	1.008	0	0	9.434	46.392	0	38.665	129.439	5.276	75.489	28.256	0	7.018	62.238
QAP0	0	47.196	2.004	10.644	155.128	116.587	50.086	46.411	574.328	1.459	1.078	188.696	289.27	534.062	37.003	27.037	253.587	24.672	1.525	20.421	58.946	126.013	55.904	54.395	5.79	1.373	0	0	8.029	51.485	0	56.915	189.131	7.062	71.246	43.65	0	5.511	95.946
QACB1	0	78.153	3.84	10.396	149.667	113.784	47.787	54.957	549.399	0.955	1.097	183.537	283.276	517.286	35.828	26.128	245.129	23.957	1.435	14.301	57.056	123.42	53.626	52.751	6.071	1.366	0.466	0	9.08	50.201	0	56.095	182.445	6.827	68.834	42.344	0	5.874	92.811
QACB2	0	134.883	7.779	10.606	152.838	125.385	48.753	68.536	554.511	0.637	1.142	192.481	297.432	530.079	36.343	26.769	250.678	26.858	1.529	15.19	60.807	131.325	55.446	56.125	7.243	1.419	0.445	0.274	12.01	53.146	0.161	58.568	208.296	6.94	71.741	43.091	0	5.705	143.04
QACB3	0	156.084	11.326	10.199	149.05	123.214	48.157	77.797	524.599	0.143	1.076	184.413	287.438	510.085	34.449	24.928	240.886	26.931	1.435	15.265	59.488	129.832	55.389	55.675	7.481	1.269	0.371	0.077	14.694	50.585	0.083	55.842	192.051	6.539	69.2	40.867	0	5.328	118.46
QACB5	0	188.243	16.584	10.316	154.536	128.38	49.834	95.022	518.661	0.941	1.068	187.212	295.621	518.146	34.446	25.096	244.938	28.521	1.37	14.284	61.923	135.824	57.208	57.811	8.113	1.317	0	0.019	19.517	51.246	0.08	57.982	187.542	6.62	70.057	40.738	0	5.354	99.88
QACB7	0	222.432	24.03	11.59	174.968	149.326	54.963	117.578	555.467	1.122	1.242	211.945	335.586	583.4	38.424	27.933	275.273	32.716	1.55	20.101	71.621	155.971	64.043	66.742	9.3	1.494	0	0.444	23.212	58.141	0	69.745	214.752	7.338	79.727	46.004	0	4.721	113.945
QAP1	0	47.886	2.626	10.906	156.427	118.495	50.171	49.472	578.222	0.523	1.147	191.93	296.56	542.679	37.636	27.53	257.502	24.998	1.543	21.917	59.734	128.081	57.362	55.272	5.878	1.449	0.453	0.07	8.337	52.121	0.114	58.049	192.23	7.161	72.541	44.339	0	7.088	97.429
QAP2	0	49.095	3.163	11.235	159.902	121.174	50.557	51.986	588.316	0.643	1.212	195.908	304.152	553.972	38.458	28.094	262.908	25.555	1.557	18.172	61.142	130.818	57.958	56.578	6.099	1.424	0.363	0	8.624	53.738	0	59.607	196.766	7.354	74.22	45.29	0	7.374	99.556
QAP3	0	48.689	3.741	10.985	155.526	118.591	48.442	53.291	566.873	0.663	1.144	190.748	302.915	539.196	37.456	27.314	255.662	24.923	1.508	17.452	59.407	127.126	57.018	55.103	5.913	1.533	0.443	0	8.614	52.366	0	58.56	191.213	7.175	72.278	43.937	0	7.438	96.341
QAP5	0	48.222	4.531	11.178	157.616	120.771	47.851	60.61	568.59	0.433	1.196	194.332	305.584	547.41	38.019	27.766	260.518	25.285	1.543	16.894	60.712	129.954	57.022	56.164	5.917	1.471	0.092	0.136	8.653	53.129	0	60.424	194.59	7.335	73.613	44.836	0	7.26	97.651
QAP7	0	46.489	5.493	10.792	153.606	127.212	44.967	61.912	541.727	0	1.106	187.32	301.386	531.279	40.385	26.632	251.103	24.414	1.48	18.13	58.911	125.392	55.24	54.191	5.796	1.432	0	0.072	8.491	51.438	0	59.084	188.14	7.07	73.338	43.343	0	6.407	94.856
Amino Acid	PSER	TAU2	ASP2	HYP2	THR2	SER2	ASN2	GLU2	GLN2	SAR	AAD	PRO2	GLY2	ALA2	CIT2	ABU	VAL2	MET2	ALLISO	CYS2	ILE2	LEU2	TYR2	PHE2	BALA2	BABA	GBA	HCY	ETN	TRP2	HYL	ORN2	LYS2	1MHIS	HIS2	3MHIS	ANSP	CARSN	ARG2
NMP2	0	38.759	3.466	5.684	96.246	91.435	47.994	47.817	576.044	0	0.415	210.756	270.91	571.115	32.105	13.38	199.333	23.136	1.581	7.13	62.874	129.441	59.156	54.281	9.29	0.777	0	0	10.645	45.909	0	39.869	127.485	4.618	74.836	28.468	0	9.624	66.225
NMP3	0	37.385	3.929	5.575	93.917	88.912	45.467	51.482	557.267	0.963	0	206.432	266.994	556.015	31.341	13.133	194.341	22.7	1.513	4.68	61.442	126.56	57.645	53.832	8.927	0	0	0	10.519	45.21	0	39.188	125.249	4.486	73.412	27.728	0	8.81	67.972
NMP5	0	38.672	5.34	5.814	97.148	98.682	45.868	62.429	560.574	0	0	215.552	280.612	576.652	32.319	13.495	200.774	23.705	1.583	6.157	63.025	130.175	59.798	57.038	9.683	1.192	0	0	11.12	46.282	0	42.27	136.013	4.754	76.793	28.723	0	9.226	81.779
NMP7	0	38.561	7.999	5.806	100.668	117.268	47.586	69.507	559.381	0.571	0	229.19	297.232	585.85	32.48	13.49	204.379	26.172	1.632	6.017	68.143	138.662	61.942	62.541	9.023	0.583	0	0	12.712	47.244	0.536	44.781	164.908	4.813	82.403	29.286	0	7.963	135.57
NMD0	0	37.157	1.727	5.375	96.665	90.776	50.237	0	611.77	0	0	208.737	273.854	572.272	25.13	13.347	199.511	22.745	1.651	43.258	61.527	128.064	56.598	53.627	0	0.979	0.309	0	8.591	46.167	0	37.283	127.97	5.214	75.308	27.915	0	5.569	61.829
NMCB1	0	60.629	4.034	5.572	95.53	94.264	48.35	0	597.232	0	0.313	210.16	277.395	570.226	45.781	13.428	199.223	22.774	1.639	54.719	60.884	129.182	55.646	53.968	0	0.979	0.391	0.096	9.764	47.558	0	40.619	128.362	5.203	75.055	28.724	0	5.564	64.538
NMCB2	0	100.957	7.963	5.729	93.029	98.999	45.409	107.82	523.247	0	0	208.545	267.065	559.083	31.952	13.014	195.405	23.287	1.522	4.474	60.558	129.245	56.778	54.721	10.383	0.388	0.228	0	13.962	46.061	0	43.374	128.547	4.439	73.169	28.044	0	5.381	71.192
NMCB3	0	144.189	10.526	5.84	104.584	106.489	52.158	92.657	564.133	0.32	0	218.394	287.913	587.101	32.26	13.366	205.581	26.745	2.157	6.518	68.97	142.722	62.646	60.348	12.721	0	0	0.383	18.041	48.519	0.085	41.982	139.379	4.569	78.922	28.691	0	6.873	82.21
NMCB5	8.226	157.85	14.999	5.833	109.192	113.389	53.222	106.413	564.883	0	0.319	228.198	309.973	610.619	33.534	13.816	214.614	29.089	1.595	5.139	70.377	150.179	65.644	63.308	13.513	0	0	0.174	20.706	50.328	0	50.584	148.6	4.682	81.384	29.581	0	6.6	81.223
NMCB7	6.086	166.805	21.038	5.76	105.204	128.86	48.354	150.085	511.728	0	0	231.791	311.456	593.111	33.803	13.304	210.643	29.794	1.672	7.289	69.634	148.596	62.35	63.799	12.52	1.248	0	0	21.385	49.957	0	60.001	172.349	4.503	81.001	29.546	0	5.237	119.479
NMP1	0	38.2	2.381	5.491	96.622	91.282	49.983	28.879	609.671	0	0.389	210.855	282.223	574.367	32.52	13.483	200.905	23.001	1.676	53.553	62.333	129.868	57.248	54.44	9.295	1.008	0	0	9.434	46.392	0	38.665	129.439	5.276	75.489	28.256	0	7.018	62.238
QAP0	0	47.196	2.004	10.644	155.128	116.587	50.086	46.411	574.328	1.459	1.078	188.696	289.27	534.062	37.003	27.037	253.587	24.672	1.525	20.421	58.946	126.013	55.904	54.395	5.79	1.373	0	0	8.029	51.485	0	56.915	189.131	7.062	71.246	43.65	0	5.511	95.946
QACB1	0	78.153	3.84	10.396	149.667	113.784	47.787	54.957	549.399	0.955	1.097	183.537	283.276	517.286	35.828	26.128	245.129	23.957	1.435	14.301	57.056	123.42	53.626	52.751	6.071	1.366	0.466	0	9.08	50.201	0	56.095	182.445	6.827	68.834	42.344	0	5.874	92.811
QACB2	0	134.883	7.779	10.606	152.838	125.385	48.753	68.536	554.511	0.637	1.142	192.481	297.432	530.079	36.343	26.769	250.678	26.858	1.529	15.19	60.807	131.325	55.446	56.125	7.243	1.419	0.445	0.274	12.01	53.146	0.161	58.568	208.296	6.94	71.741	43.091	0	5.705	143.04
QACB3	0	156.084	11.326	10.199	149.05	123.214	48.157	77.797	524.599	0.143	1.076	184.413	287.438	510.085	34.449	24.928	240.886	26.931	1.435	15.265	59.488	129.832	55.389	55.675	7.481	1.269	0.371	0.077	14.694	50.585	0.083	55.842	192.051	6.539	69.2	40.867	0	5.328	118.46
QACB5	0	188.243	16.584	10.316	154.536	128.38	49.834	95.022	518.661	0.941	1.068	187.212	295.621	518.146	34.446	25.096	244.938	28.521	1.37	14.284	61.923	135.824	57.208	57.811	8.113	1.317	0	0.019	19.517	51.246	0.08	57.982	187.542	6.62	70.057	40.738	0	5.354	99.88
QACB7	0	222.432	24.03	11.59	174.968	149.326	54.963	117.578	555.467	1.122	1.242	211.945	335.586	583.4	38.424	27.933	275.273	32.716	1.55	20.101	71.621	155.971	64.043	66.742	9.3	1.494	0	0.444	23.212	58.141	0	69.745	214.752	7.338	79.727	46.004	0	4.721	113.945
QAP1	0	47.886	2.626	10.906	156.427	118.495	50.171	49.472	578.222	0.523	1.147	191.93	296.56	542.679	37.636	27.53	257.502	24.998	1.543	21.917	59.734	128.081	57.362	55.272	5.878	1.449	0.453	0.07	8.337	52.121	0.114	58.049	192.23	7.161	72.541	44.339	0	7.088	97.429
QAP2	0	49.095	3.163	11.235	159.902	121.174	50.557	51.986	588.316	0.643	1.212	195.908	304.152	553.972	38.458	28.094	262.908	25.555	1.557	18.172	61.142	130.818	57.958	56.578	6.099	1.424	0.363	0	8.624	53.738	0	59.607	196.766	7.354	74.22	45.29	0	7.374	99.556
QAP3	0	48.689	3.741	10.985	155.526	118.591	48.442	53.291	566.873	0.663	1.144	190.748	302.915	539.196	37.456	27.314	255.662	24.923	1.508	17.452	59.407	127.126	57.018	55.103	5.913	1.533	0.443	0	8.614	52.366	0	58.56	191.213	7.175	72.278	43.937	0	7.438	96.341
QAP5	0	48.222	4.531	11.178	157.616	120.771	47.851	60.61	568.59	0.433	1.196	194.332	305.584	547.41	38.019	27.766	260.518	25.285	1.543	16.894	60.712	129.954	57.022	56.164	5.917	1.471	0.092	0.136	8.653	53.129	0	60.424	194.59	7.335	73.613	44.836	0	7.26	97.651
QAP7	0	46.489	5.493	10.792	153.606	127.212	44.967	61.912	541.727	0	1.106	187.32	301.386	531.279	40.385	26.632	251.103	24.414	1.48	18.13	58.911	125.392	55.24	54.191	5.796	1.432	0	0.072	8.491	51.438	0	59.084	188.14	7.07	73.338	43.343	0	6.407	94.856
Amino Acid	PSER	TAU2	ASP2	HYP2	THR2	SER2	ASN2	GLU2	GLN2	SAR	AAD	PRO2	GLY2	ALA2	CIT2	ABU	VAL2	MET2	ALLISO	CYS2	ILE2	LEU2	TYR2	PHE2	BALA2	BABA	GBA	HCY	ETN	TRP2	HYL	ORN2	LYS2	1MHIS	HIS2	3MHIS	ANSP	CARSN	ARG2
NMP2	0	38.759	3.466	5.684	96.246	91.435	47.994	47.817	576.044	0	0.415	210.756	270.91	571.115	32.105	13.38	199.333	23.136	1.581	7.13	62.874	129.441	59.156	54.281	9.29	0.777	0	0	10.645	45.909	0	39.869	127.485	4.618	74.836	28.468	0	9.624	66.225
NMP3	0	37.385	3.929	5.575	93.917	88.912	45.467	51.482	557.267	0.963	0	206.432	266.994	556.015	31.341	13.133	194.341	22.7	1.513	4.68	61.442	126.56	57.645	53.832	8.927	0	0	0	10.519	45.21	0	39.188	125.249	4.486	73.412	27.728	0	8.81	67.972
NMP5	0	38.672	5.34	5.814	97.148	98.682	45.868	62.429	560.574	0	0	215.552	280.612	576.652	32.319	13.495	200.774	23.705	1.583	6.157	63.025	130.175	59.798	57.038	9.683	1.192	0	0	11.12	46.282	0	42.27	136.013	4.754	76.793	28.723	0	9.226	81.779
NMP7	0	38.561	7.999	5.806	100.668	117.268	47.586	69.507	559.381	0.571	0	229.19	297.232	585.85	32.48	13.49	204.379	26.172	1.632	6.017	68.143	138.662	61.942	62.541	9.023	0.583	0	0	12.712	47.244	0.536	44.781	164.908	4.813	82.403	29.286	0	7.963	135.57
NMD0	0	37.157	1.727	5.375	96.665	90.776	50.237	0	611.77	0	0	208.737	273.854	572.272	25.13	13.347	199.511	22.745	1.651	43.258	61.527	128.064	56.598	53.627	0	0.979	0.309	0	8.591	46.167	0	37.283	127.97	5.214	75.308	27.915	0	5.569	61.829
NMCB1	0	60.629	4.034	5.572	95.53	94.264	48.35	0	597.232	0	0.313	210.16	277.395	570.226	45.781	13.428	199.223	22.774	1.639	54.719	60.884	129.182	55.646	53.968	0	0.979	0.391	0.096	9.764	47.558	0	40.619	128.362	5.203	75.055	28.724	0	5.564	64.538
NMCB2	0	100.957	7.963	5.729	93.029	98.999	45.409	107.82	523.247	0	0	208.545	267.065	559.083	31.952	13.014	195.405	23.287	1.522	4.474	60.558	129.245	56.778	54.721	10.383	0.388	0.228	0	13.962	46.061	0	43.374	128.547	4.439	73.169	28.044	0	5.381	71.192
NMCB3	0	144.189	10.526	5.84	104.584	106.489	52.158	92.657	564.133	0.32	0	218.394	287.913	587.101	32.26	13.366	205.581	26.745	2.157	6.518	68.97	142.722	62.646	60.348	12.721	0	0	0.383	18.041	48.519	0.085	41.982	139.379	4.569	78.922	28.691	0	6.873	82.21
NMCB5	8.226	157.85	14.999	5.833	109.192	113.389	53.222	106.413	564.883	0	0.319	228.198	309.973	610.619	33.534	13.816	214.614	29.089	1.595	5.139	70.377	150.179	65.644	63.308	13.513	0	0	0.174	20.706	50.328	0	50.584	148.6	4.682	81.384	29.581	0	6.6	81.223
NMCB7	6.086	166.805	21.038	5.76	105.204	128.86	48.354	150.085	511.728	0	0	231.791	311.456	593.111	33.803	13.304	210.643	29.794	1.672	7.289	69.634	148.596	62.35	63.799	12.52	1.248	0	0	21.385	49.957	0	60.001	172.349	4.503	81.001	29.546	0	5.237	119.479
NMP1	0	38.2	2.381	5.491	96.622	91.282	49.983	28.879	609.671	0	0.389	210.855	282.223	574.367	32.52	13.483	200.905	23.001	1.676	53.553	62.333	129.868	57.248	54.44	9.295	1.008	0	0	9.434	46.392	0	38.665	129.439	5.276	75.489	28.256	0	7.018	62.238
QAP0	0	47.196	2.004	10.644	155.128	116.587	50.086	46.411	574.328	1.459	1.078	188.696	289.27	534.062	37.003	27.037	253.587	24.672	1.525	20.421	58.946	126.013	55.904	54.395	5.79	1.373	0	0	8.029	51.485	0	56.915	189.131	7.062	71.246	43.65	0	5.511	95.946
QACB1	0	78.153	3.84	10.396	149.667	113.784	47.787	54.957	549.399	0.955	1.097	183.537	283.276	517.286	35.828	26.128	245.129	23.957	1.435	14.301	57.056	123.42	53.626	52.751	6.071	1.366	0.466	0	9.08	50.201	0	56.095	182.445	6.827	68.834	42.344	0	5.874	92.811
QACB2	0	134.883	7.779	10.606	152.838	125.385	48.753	68.536	554.511	0.637	1.142	192.481	297.432	530.079	36.343	26.769	250.678	26.858	1.529	15.19	60.807	131.325	55.446	56.125	7.243	1.419	0.445	0.274	12.01	53.146	0.161	58.568	208.296	6.94	71.741	43.091	0	5.705	143.04
QACB3	0	156.084	11.326	10.199	149.05	123.214	48.157	77.797	524.599	0.143	1.076	184.413	287.438	510.085	34.449	24.928	240.886	26.931	1.435	15.265	59.488	129.832	55.389	55.675	7.481	1.269	0.371	0.077	14.694	50.585	0.083	55.842	192.051	6.539	69.2	40.867	0	5.328	118.46
QACB5	0	188.243	16.584	10.316	154.536	128.38	49.834	95.022	518.661	0.941	1.068	187.212	295.621	518.146	34.446	25.096	244.938	28.521	1.37	14.284	61.923	135.824	57.208	57.811	8.113	1.317	0	0.019	19.517	51.246	0.08	57.982	187.542	6.62	70.057	40.738	0	5.354	99.88
QACB7	0	222.432	24.03	11.59	174.968	149.326	54.963	117.578	555.467	1.122	1.242	211.945	335.586	583.4	38.424	27.933	275.273	32.716	1.55	20.101	71.621	155.971	64.043	66.742	9.3	1.494	0	0.444	23.212	58.141	0	69.745	214.752	7.338	79.727	46.004	0	4.721	113.945
QAP1	0	47.886	2.626	10.906	156.427	118.495	50.171	49.472	578.222	0.523	1.147	191.93	296.56	542.679	37.636	27.53	257.502	24.998	1.543	21.917	59.734	128.081	57.362	55.272	5.878	1.449	0.453	0.07	8.337	52.121	0.114	58.049	192.23	7.161	72.541	44.339	0	7.088	97.429
QAP2	0	49.095	3.163	11.235	159.902	121.174	50.557	51.986	588.316	0.643	1.212	195.908	304.152	553.972	38.458	28.094	262.908	25.555	1.557	18.172	61.142	130.818	57.958	56.578	6.099	1.424	0.363	0	8.624	53.738	0	59.607	196.766	7.354	74.22	45.29	0	7.374	99.556
QAP3	0	48.689	3.741	10.985	155.526	118.591	48.442	53.291	566.873	0.663	1.144	190.748	302.915	539.196	37.456	27.314	255.662	24.923	1.508	17.452	59.407	127.126	57.018	55.103	5.913	1.533	0.443	0	8.614	52.366	0	58.56	191.213	7.175	72.278	43.937	0	7.438	96.341
QAP5	0	48.222	4.531	11.178	157.616	120.771	47.851	60.61	568.59	0.433	1.196	194.332	305.584	547.41	38.019	27.766	260.518	25.285	1.543	16.894	60.712	129.954	57.022	56.164	5.917	1.471	0.092	0.136	8.653	53.129	0	60.424	194.59	7.335	73.613	44.836	0	7.26	97.651
QAP7	0	46.489	5.493	10.792	153.606	127.212	44.967	61.912	541.727	0	1.106	187.32	301.386	531.279	40.385	26.632	251.103	24.414	1.48	18.13	58.911	125.392	55.24	54.191	5.796	1.432	0	0.072	8.491	51.438	0	59.084	188.14	7.07	73.338	43.343	0	6.407	94.856
Amino Acid	PSER	TAU2	ASP2	HYP2	THR2	SER2	ASN2	GLU2	GLN2	SAR	AAD	PRO2	GLY2	ALA2	CIT2	ABU	VAL2	MET2	ALLISO	CYS2	ILE2	LEU2	TYR2	PHE2	BALA2	BABA	GBA	HCY	ETN	TRP2	HYL	ORN2	LYS2	1MHIS	HIS2	3MHIS	ANSP	CARSN	ARG2
NMP2	0	38.759	3.466	5.684	96.246	91.435	47.994	47.817	576.044	0	0.415	210.756	270.91	571.115	32.105	13.38	199.333	23.136	1.581	7.13	62.874	129.441	59.156	54.281	9.29	0.777	0	0	10.645	45.909	0	39.869	127.485	4.618	74.836	28.468	0	9.624	66.225
NMP3	0	37.385	3.929	5.575	93.917	88.912	45.467	51.482	557.267	0.963	0	206.432	266.994	556.015	31.341	13.133	194.341	22.7	1.513	4.68	61.442	126.56	57.645	53.832	8.927	0	0	0	10.519	45.21	0	39.188	125.249	4.486	73.412	27.728	0	8.81	67.972
NMP5	0	38.672	5.34	5.814	97.148	98.682	45.868	62.429	560.574	0	0	215.552	280.612	576.652	32.319	13.495	200.774	23.705	1.583	6.157	63.025	130.175	59.798	57.038	9.683	1.192	0	0	11.12	46.282	0	42.27	136.013	4.754	76.793	28.723	0	9.226	81.779
NMP7	0	38.561	7.999	5.806	100.668	117.268	47.586	69.507	559.381	0.571	0	229.19	297.232	585.85	32.48	13.49	204.379	26.172	1.632	6.017	68.143	138.662	61.942	62.541	9.023	0.583	0	0	12.712	47.244	0.536	44.781	164.908	4.813	82.403	29.286	0	7.963	135.57
NMD0	0	37.157	1.727	5.375	96.665	90.776	50.237	0	611.77	0	0	208.737	273.854	572.272	25.13	13.347	199.511	22.745	1.651	43.258	61.527	128.064	56.598	53.627	0	0.979	0.309	0	8.591	46.167	0	37.283	127.97	5.214	75.308	27.915	0	5.569	61.829
NMCB1	0	60.629	4.034	5.572	95.53	94.264	48.35	0	597.232	0	0.313	210.16	277.395	570.226	45.781	13.428	199.223	22.774	1.639	54.719	60.884	129.182	55.646	53.968	0	0.979	0.391	0.096	9.764	47.558	0	40.619	128.362	5.203	75.055	28.724	0	5.564	64.538
NMCB2	0	100.957	7.963	5.729	93.029	98.999	45.409	107.82	523.247	0	0	208.545	267.065	559.083	31.952	13.014	195.405	23.287	1.522	4.474	60.558	129.245	56.778	54.721	10.383	0.388	0.228	0	13.962	46.061	0	43.374	128.547	4.439	73.169	28.044	0	5.381	71.192
NMCB3	0	144.189	10.526	5.84	104.584	106.489	52.158	92.657	564.133	0.32	0	218.394	287.913	587.101	32.26	13.366	205.581	26.745	2.157	6.518	68.97	142.722	62.646	60.348	12.721	0	0	0.383	18.041	48.519	0.085	41.982	139.379	4.569	78.922	28.691	0	6.873	82.21
NMCB5	8.226	157.85	14.999	5.833	109.192	113.389	53.222	106.413	564.883	0	0.319	228.198	309.973	610.619	33.534	13.816	214.614	29.089	1.595	5.139	70.377	150.179	65.644	63.308	13.513	0	0	0.174	20.706	50.328	0	50.584	148.6	4.682	81.384	29.581	0	6.6	81.223
NMCB7	6.086	166.805	21.038	5.76	105.204	128.86	48.354	150.085	511.728	0	0	231.791	311.456	593.111	33.803	13.304	210.643	29.794	1.672	7.289	69.634	148.596	62.35	63.799	12.52	1.248	0	0	21.385	49.957	0	60.001	172.349	4.503	81.001	29.546	0	5.237	119.479
NMP1	0	38.2	2.381	5.491	96.622	91.282	49.983	28.879	609.671	0	0.389	210.855	282.223	574.367	32.52	13.483	200.905	23.001	1.676	53.553	62.333	129.868	57.248	54.44	9.295	1.008	0	0	9.434	46.392	0	38.665	129.439	5.276	75.489	28.256	0	7.018	62.238
QAP0	0	47.196	2.004	10.644	155.128	116.587	50.086	46.411	574.328	1.459	1.078	188.696	289.27	534.062	37.003	27.037	253.587	24.672	1.525	20.421	58.946	126.013	55.904	54.395	5.79	1.373	0	0	8.029	51.485	0	56.915	189.131	7.062	71.246	43.65	0	5.511	95.946
QACB1	0	78.153	3.84	10.396	149.667	113.784	47.787	54.957	549.399	0.955	1.097	183.537	283.276	517.286	35.828	26.128	245.129	23.957	1.435	14.301	57.056	123.42	53.626	52.751	6.071	1.366	0.466	0	9.08	50.201	0	56.095	182.445	6.827	68.834	42.344	0	5.874	92.811
QACB2	0	134.883	7.779	10.606	152.838	125.385	48.753	68.536	554.511	0.637	1.142	192.481	297.432	530.079	36.343	26.769	250.678	26.858	1.529	15.19	60.807	131.325	55.446	56.125	7.243	1.419	0.445	0.274	12.01	53.146	0.161	58.568	208.296	6.94	71.741	43.091	0	5.705	143.04
QACB3	0	156.084	11.326	10.199	149.05	123.214	48.157	77.797	524.599	0.143	1.076	184.413	287.438	510.085	34.449	24.928	240.886	26.931	1.435	15.265	59.488	129.832	55.389	55.675	7.481	1.269	0.371	0.077	14.694	50.585	0.083	55.842	192.051	6.539	69.2	40.867	0	5.328	118.46
QACB5	0	188.243	16.584	10.316	154.536	128.38	49.834	95.022	518.661	0.941	1.068	187.212	295.621	518.146	34.446	25.096	244.938	28.521	1.37	14.284	61.923	135.824	57.208	57.811	8.113	1.317	0	0.019	19.517	51.246	0.08	57.982	187.542	6.62	70.057	40.738	0	5.354	99.88
QACB7	0	222.432	24.03	11.59	174.968	149.326	54.963	117.578	555.467	1.122	1.242	211.945	335.586	583.4	38.424	27.933	275.273	32.716	1.55	20.101	71.621	155.971	64.043	66.742	9.3	1.494	0	0.444	23.212	58.141	0	69.745	214.752	7.338	79.727	46.004	0	4.721	113.945
QAP1	0	47.886	2.626	10.906	156.427	118.495	50.171	49.472	578.222	0.523	1.147	191.93	296.56	542.679	37.636	27.53	257.502	24.998	1.543	21.917	59.734	128.081	57.362	55.272	5.878	1.449	0.453	0.07	8.337	52.121	0.114	58.049	192.23	7.161	72.541	44.339	0	7.088	97.429
QAP2	0	49.095	3.163	11.235	159.902	121.174	50.557	51.986	588.316	0.643	1.212	195.908	304.152	553.972	38.458	28.094	262.908	25.555	1.557	18.172	61.142	130.818	57.958	56.578	6.099	1.424	0.363	0	8.624	53.738	0	59.607	196.766	7.354	74.22	45.29	0	7.374	99.556
QAP3	0	48.689	3.741	10.985	155.526	118.591	48.442	53.291	566.873	0.663	1.144	190.748	302.915	539.196	37.456	27.314	255.662	24.923	1.508	17.452	59.407	127.126	57.018	55.103	5.913	1.533	0.443	0	8.614	52.366	0	58.56	191.213	7.175	72.278	43.937	0	7.438	96.341
QAP5	0	48.222	4.531	11.178	157.616	120.771	47.851	60.61	568.59	0.433	1.196	194.332	305.584	547.41	38.019	27.766	260.518	25.285	1.543	16.894	60.712	129.954	57.022	56.164	5.917	1.471	0.092	0.136	8.653	53.129	0	60.424	194.59	7.335	73.613	44.836	0	7.26	97.651
QAP7	0	46.489	5.493	10.792	153.606	127.212	44.967	61.912	541.727	0	1.106	187.32	301.386	531.279	40.385	26.632	251.103	24.414	1.48	18.13	58.911	125.392	55.24	54.191	5.796	1.432	0	0.072	8.491	51.438	0	59.084	188.14	7.07	73.338	43.343	0	6.407	94.856
Amino Acid	PSER	TAU2	ASP2	HYP2	THR2	SER2	ASN2	GLU2	GLN2	SAR	AAD	PRO2	GLY2	ALA2	CIT2	ABU	VAL2	MET2	ALLISO	CYS2	ILE2	LEU2	TYR2	PHE2	BALA2	BABA	GBA	HCY	ETN	TRP2	HYL	ORN2	LYS2	1MHIS	HIS2	3MHIS	ANSP	CARSN	ARG2
NMP2	0	38.759	3.466	5.684	96.246	91.435	47.994	47.817	576.044	0	0.415	210.756	270.91	571.115	32.105	13.38	199.333	23.136	1.581	7.13	62.874	129.441	59.156	54.281	9.29	0.777	0	0	10.645	45.909	0	39.869	127.485	4.618	74.836	28.468	0	9.624	66.225
NMP3	0	37.385	3.929	5.575	93.917	88.912	45.467	51.482	557.267	0.963	0	206.432	266.994	556.015	31.341	13.133	194.341	22.7	1.513	4.68	61.442	126.56	57.645	53.832	8.927	0	0	0	10.519	45.21	0	39.188	125.249	4.486	73.412	27.728	0	8.81	67.972
NMP5	0	38.672	5.34	5.814	97.148	98.682	45.868	62.429	560.574	0	0	215.552	280.612	576.652	32.319	13.495	200.774	23.705	1.583	6.157	63.025	130.175	59.798	57.038	9.683	1.192	0	0	11.12	46.282	0	42.27	136.013	4.754	76.793	28.723	0	9.226	81.779
NMP7	0	38.561	7.999	5.806	100.668	117.268	47.586	69.507	559.381	0.571	0	229.19	297.232	585.85	32.48	13.49	204.379	26.172	1.632	6.017	68.143	138.662	61.942	62.541	9.023	0.583	0	0	12.712	47.244	0.536	44.781	164.908	4.813	82.403	29.286	0	7.963	135.57
NMD0	0	37.157	1.727	5.375	96.665	90.776	50.237	0	611.77	0	0	208.737	273.854	572.272	25.13	13.347	199.511	22.745	1.651	43.258	61.527	128.064	56.598	53.627	0	0.979	0.309	0	8.591	46.167	0	37.283	127.97	5.214	75.308	27.915	0	5.569	61.829
NMCB1	0	60.629	4.034	5.572	95.53	94.264	48.35	0	597.232	0	0.313	210.16	277.395	570.226	45.781	13.428	199.223	22.774	1.639	54.719	60.884	129.182	55.646	53.968	0	0.979	0.391	0.096	9.764	47.558	0	40.619	128.362	5.203	75.055	28.724	0	5.564	64.538
NMCB2	0	100.957	7.963	5.729	93.029	98.999	45.409	107.82	523.247	0	0	208.545	267.065	559.083	31.952	13.014	195.405	23.287	1.522	4.474	60.558	129.245	56.778	54.721	10.383	0.388	0.228	0	13.962	46.061	0	43.374	128.547	4.439	73.169	28.044	0	5.381	71.192
NMCB3	0	144.189	10.526	5.84	104.584	106.489	52.158	92.657	564.133	0.32	0	218.394	287.913	587.101	32.26	13.366	205.581	26.745	2.157	6.518	68.97	142.722	62.646	60.348	12.721	0	0	0.383	18.041	48.519	0.085	41.982	139.379	4.569	78.922	28.691	0	6.873	82.21
NMCB5	8.226	157.85	14.999	5.833	109.192	113.389	53.222	106.413	564.883	0	0.319	228.198	309.973	610.619	33.534	13.816	214.614	29.089	1.595	5.139	70.377	150.179	65.644	63.308	13.513	0	0	0.174	20.706	50.328	0	50.584	148.6	4.682	81.384	29.581	0	6.6	81.223
NMCB7	6.086	166.805	21.038	5.76	105.204	128.86	48.354	150.085	511.728	0	0	231.791	311.456	593.111	33.803	13.304	210.643	29.794	1.672	7.289	69.634	148.596	62.35	63.799	12.52	1.248	0	0	21.385	49.957	0	60.001	172.349	4.503	81.001	29.546	0	5.237	119.479
NMP1	0	38.2	2.381	5.491	96.622	91.282	49.983	28.879	609.671	0	0.389	210.855	282.223	574.367	32.52	13.483	200.905	23.001	1.676	53.553	62.333	129.868	57.248	54.44	9.295	1.008	0	0	9.434	46.392	0	38.665	129.439	5.276	75.489	28.256	0	7.018	62.238
QAP0	0	47.196	2.004	10.644	155.128	116.587	50.086	46.411	574.328	1.459	1.078	188.696	289.27	534.062	37.003	27.037	253.587	24.672	1.525	20.421	58.946	126.013	55.904	54.395	5.79	1.373	0	0	8.029	51.485	0	56.915	189.131	7.062	71.246	43.65	0	5.511	95.946
QACB1	0	78.153	3.84	10.396	149.667	113.784	47.787	54.957	549.399	0.955	1.097	183.537	283.276	517.286	35.828	26.128	245.129	23.957	1.435	14.301	57.056	123.42	53.626	52.751	6.071	1.366	0.466	0	9.08	50.201	0	56.095	182.445	6.827	68.834	42.344	0	5.874	92.811
QACB2	0	134.883	7.779	10.606	152.838	125.385	48.753	68.536	554.511	0.637	1.142	192.481	297.432	530.079	36.343	26.769	250.678	26.858	1.529	15.19	60.807	131.325	55.446	56.125	7.243	1.419	0.445	0.274	12.01	53.146	0.161	58.568	208.296	6.94	71.741	43.091	0	5.705	143.04
QACB3	0	156.084	11.326	10.199	149.05	123.214	48.157	77.797	524.599	0.143	1.076	184.413	287.438	510.085	34.449	24.928	240.886	26.931	1.435	15.265	59.488	129.832	55.389	55.675	7.481	1.269	0.371	0.077	14.694	50.585	0.083	55.842	192.051	6.539	69.2	40.867	0	5.328	118.46
QACB5	0	188.243	16.584	10.316	154.536	128.38	49.834	95.022	518.661	0.941	1.068	187.212	295.621	518.146	34.446	25.096	244.938	28.521	1.37	14.284	61.923	135.824	57.208	57.811	8.113	1.317	0	0.019	19.517	51.246	0.08	57.982	187.542	6.62	70.057	40.738	0	5.354	99.88
QACB7	0	222.432	24.03	11.59	174.968	149.326	54.963	117.578	555.467	1.122	1.242	211.945	335.586	583.4	38.424	27.933	275.273	32.716	1.55	20.101	71.621	155.971	64.043	66.742	9.3	1.494	0	0.444	23.212	58.141	0	69.745	214.752	7.338	79.727	46.004	0	4.721	113.945
QAP1	0	47.886	2.626	10.906	156.427	118.495	50.171	49.472	578.222	0.523	1.147	191.93	296.56	542.679	37.636	27.53	257.502	24.998	1.543	21.917	59.734	128.081	57.362	55.272	5.878	1.449	0.453	0.07	8.337	52.121	0.114	58.049	192.23	7.161	72.541	44.339	0	7.088	97.429
QAP2	0	49.095	3.163	11.235	159.902	121.174	50.557	51.986	588.316	0.643	1.212	195.908	304.152	553.972	38.458	28.094	262.908	25.555	1.557	18.172	61.142	130.818	57.958	56.578	6.099	1.424	0.363	0	8.624	53.738	0	59.607	196.766	7.354	74.22	45.29	0	7.374	99.556
QAP3	0	48.689	3.741	10.985	155.526	118.591	48.442	53.291	566.873	0.663	1.144	190.748	302.915	539.196	37.456	27.314	255.662	24.923	1.508	17.452	59.407	127.126	57.018	55.103	5.913	1.533	0.443	0	8.614	52.366	0	58.56	191.213	7.175	72.278	43.937	0	7.438	96.341
QAP5	0	48.222	4.531	11.178	157.616	120.771	47.851	60.61	568.59	0.433	1.196	194.332	305.584	547.41	38.019	27.766	260.518	25.285	1.543	16.894	60.712	129.954	57.022	56.164	5.917	1.471	0.092	0.136	8.653	53.129	0	60.424	194.59	7.335	73.613	44.836	0	7.26	97.651
QAP7	0	46.489	5.493	10.792	153.606	127.212	44.967	61.912	541.727	0	1.106	187.32	301.386	531.279	40.385	26.632	251.103	24.414	1.48	18.13	58.911	125.392	55.24	54.191	5.796	1.432	0	0.072	8.491	51.438	0	59.084	188.14	7.07	73.338	43.343	0	6.407	94.856
Amino Acid	PSER	TAU2	ASP2	HYP2	THR2	SER2	ASN2	GLU2	GLN2	SAR	AAD	PRO2	GLY2	ALA2	CIT2	ABU	VAL2	MET2	ALLISO	CYS2	ILE2	LEU2	TYR2	PHE2	BALA2	BABA	GBA	HCY	ETN	TRP2	HYL	ORN2	LYS2	1MHIS	HIS2	3MHIS	ANSP	CARSN	ARG2
NMP2	0	38.759	3.466	5.684	96.246	91.435	47.994	47.817	576.044	0	0.415	210.756	270.91	571.115	32.105	13.38	199.333	23.136	1.581	7.13	62.874	129.441	59.156	54.281	9.29	0.777	0	0	10.645	45.909	0	39.869	127.485	4.618	74.836	28.468	0	9.624	66.225
NMP3	0	37.385	3.929	5.575	93.917	88.912	45.467	51.482	557.267	0.963	0	206.432	266.994	556.015	31.341	13.133	194.341	22.7	1.513	4.68	61.442	126.56	57.645	53.832	8.927	0	0	0	10.519	45.21	0	39.188	125.249	4.486	73.412	27.728	0	8.81	67.972
NMP5	0	38.672	5.34	5.814	97.148	98.682	45.868	62.429	560.574	0	0	215.552	280.612	576.652	32.319	13.495	200.774	23.705	1.583	6.157	63.025	130.175	59.798	57.038	9.683	1.192	0	0	11.12	46.282	0	42.27	136.013	4.754	76.793	28.723	0	9.226	81.779
NMP7	0	38.561	7.999	5.806	100.668	117.268	47.586	69.507	559.381	0.571	0	229.19	297.232	585.85	32.48	13.49	204.379	26.172	1.632	6.017	68.143	138.662	61.942	62.541	9.023	0.583	0	0	12.712	47.244	0.536	44.781	164.908	4.813	82.403	29.286	0	7.963	135.57
NMD0	0	37.157	1.727	5.375	96.665	90.776	50.237	0	611.77	0	0	208.737	273.854	572.272	25.13	13.347	199.511	22.745	1.651	43.258	61.527	128.064	56.598	53.627	0	0.979	0.309	0	8.591	46.167	0	37.283	127.97	5.214	75.308	27.915	0	5.569	61.829
NMCB1	0	60.629	4.034	5.572	95.53	94.264	48.35	0	597.232	0	0.313	210.16	277.395	570.226	45.781	13.428	199.223	22.774	1.639	54.719	60.884	129.182	55.646	53.968	0	0.979	0.391	0.096	9.764	47.558	0	40.619	128.362	5.203	75.055	28.724	0	5.564	64.538
NMCB2	0	100.957	7.963	5.729	93.029	98.999	45.409	107.82	523.247	0	0	208.545	267.065	559.083	31.952	13.014	195.405	23.287	1.522	4.474	60.558	129.245	56.778	54.721	10.383	0.388	0.228	0	13.962	46.061	0	43.374	128.547	4.439	73.169	28.044	0	5.381	71.192
NMCB3	0	144.189	10.526	5.84	104.584	106.489	52.158	92.657	564.133	0.32	0	218.394	287.913	587.101	32.26	13.366	205.581	26.745	2.157	6.518	68.97	142.722	62.646	60.348	12.721	0	0	0.383	18.041	48.519	0.085	41.982	139.379	4.569	78.922	28.691	0	6.873	82.21
NMCB5	8.226	157.85	14.999	5.833	109.192	113.389	53.222	106.413	564.883	0	0.319	228.198	309.973	610.619	33.534	13.816	214.614	29.089	1.595	5.139	70.377	150.179	65.644	63.308	13.513	0	0	0.174	20.706	50.328	0	50.584	148.6	4.682	81.384	29.581	0	6.6	81.223
NMCB7	6.086	166.805	21.038	5.76	105.204	128.86	48.354	150.085	511.728	0	0	231.791	311.456	593.111	33.803	13.304	210.643	29.794	1.672	7.289	69.634	148.596	62.35	63.799	12.52	1.248	0	0	21.385	49.957	0	60.001	172.349	4.503	81.001	29.546	0	5.237	119.479
NMP1	0	38.2	2.381	5.491	96.622	91.282	49.983	28.879	609.671	0	0.389	210.855	282.223	574.367	32.52	13.483	200.905	23.001	1.676	53.553	62.333	129.868	57.248	54.44	9.295	1.008	0	0	9.434	46.392	0	38.665	129.439	5.276	75.489	28.256	0	7.018	62.238
QAP0	0	47.196	2.004	10.644	155.128	116.587	50.086	46.411	574.328	1.459	1.078	188.696	289.27	534.062	37.003	27.037	253.587	24.672	1.525	20.421	58.946	126.013	55.904	54.395	5.79	1.373	0	0	8.029	51.485	0	56.915	189.131	7.062	71.246	43.65	0	5.511	95.946
QACB1	0	78.153	3.84	10.396	149.667	113.784	47.787	54.957	549.399	0.955	1.097	183.537	283.276	517.286	35.828	26.128	245.129	23.957	1.435	14.301	57.056	123.42	53.626	52.751	6.071	1.366	0.466	0	9.08	50.201	0	56.095	182.445	6.827	68.834	42.344	0	5.874	92.811
QACB2	0	134.883	7.779	10.606	152.838	125.385	48.753	68.536	554.511	0.637	1.142	192.481	297.432	530.079	36.343	26.769	250.678	26.858	1.529	15.19	60.807	131.325	55.446	56.125	7.243	1.419	0.445	0.274	12.01	53.146	0.161	58.568	208.296	6.94	71.741	43.091	0	5.705	143.04
QACB3	0	156.084	11.326	10.199	149.05	123.214	48.157	77.797	524.599	0.143	1.076	184.413	287.438	510.085	34.449	24.928	240.886	26.931	1.435	15.265	59.488	129.832	55.389	55.675	7.481	1.269	0.371	0.077	14.694	50.585	0.083	55.842	192.051	6.539	69.2	40.867	0	5.328	118.46
QACB5	0	188.243	16.584	10.316	154.536	128.38	49.834	95.022	518.661	0.941	1.068	187.212	295.621	518.146	34.446	25.096	244.938	28.521	1.37	14.284	61.923	135.824	57.208	57.811	8.113	1.317	0	0.019	19.517	51.246	0.08	57.982	187.542	6.62	70.057	40.738	0	5.354	99.88
QACB7	0	222.432	24.03	11.59	174.968	149.326	54.963	117.578	555.467	1.122	1.242	211.945	335.586	583.4	38.424	27.933	275.273	32.716	1.55	20.101	71.621	155.971	64.043	66.742	9.3	1.494	0	0.444	23.212	58.141	0	69.745	214.752	7.338	79.727	46.004	0	4.721	113.945
QAP1	0	47.886	2.626	10.906	156.427	118.495	50.171	49.472	578.222	0.523	1.147	191.93	296.56	542.679	37.636	27.53	257.502	24.998	1.543	21.917	59.734	128.081	57.362	55.272	5.878	1.449	0.453	0.07	8.337	52.121	0.114	58.049	192.23	7.161	72.541	44.339	0	7.088	97.429
QAP2	0	49.095	3.163	11.235	159.902	121.174	50.557	51.986	588.316	0.643	1.212	195.908	304.152	553.972	38.458	28.094	262.908	25.555	1.557	18.172	61.142	130.818	57.958	56.578	6.099	1.424	0.363	0	8.624	53.738	0	59.607	196.766	7.354	74.22	45.29	0	7.374	99.556
QAP3	0	48.689	3.741	10.985	155.526	118.591	48.442	53.291	566.873	0.663	1.144	190.748	302.915	539.196	37.456	27.314	255.662	24.923	1.508	17.452	59.407	127.126	57.018	55.103	5.913	1.533	0.443	0	8.614	52.366	0	58.56	191.213	7.175	72.278	43.937	0	7.438	96.341
QAP5	0	48.222	4.531	11.178	157.616	120.771	47.851	60.61	568.59	0.433	1.196	194.332	305.584	547.41	38.019	27.766	260.518	25.285	1.543	16.894	60.712	129.954	57.022	56.164	5.917	1.471	0.092	0.136	8.653	53.129	0	60.424	194.59	7.335	73.613	44.836	0	7.26	97.651
QAP7	0	46.489	5.493	10.792	153.606	127.212	44.967	61.912	541.727	0	1.106	187.32	301.386	531.279	40.385	26.632	251.103	24.414	1.48	18.13	58.911	125.392	55.24	54.191	5.796	1.432	0	0.072	8.491	51.438	0	59.084	188.14	7.07	73.338	43.343	0	6.407	94.856
Amino Acid	PSER	TAU2	ASP2	HYP2	THR2	SER2	ASN2	GLU2	GLN2	SAR	AAD	PRO2	GLY2	ALA2	CIT2	ABU	VAL2	MET2	ALLISO	CYS2	ILE2	LEU2	TYR2	PHE2	BALA2	BABA	GBA	HCY	ETN	TRP2	HYL	ORN2	LYS2	1MHIS	HIS2	3MHIS	ANSP	CARSN	ARG2
NMP2	0	38.759	3.466	5.684	96.246	91.435	47.994	47.817	576.044	0	0.415	210.756	270.91	571.115	32.105	13.38	199.333	23.136	1.581	7.13	62.874	129.441	59.156	54.281	9.29	0.777	0	0	10.645	45.909	0	39.869	127.485	4.618	74.836	28.468	0	9.624	66.225
NMP3	0	37.385	3.929	5.575	93.917	88.912	45.467	51.482	557.267	0.963	0	206.432	266.994	556.015	31.341	13.133	194.341	22.7	1.513	4.68	61.442	126.56	57.645	53.832	8.927	0	0	0	10.519	45.21	0	39.188	125.249	4.486	73.412	27.728	0	8.81	67.972
NMP5	0	38.672	5.34	5.814	97.148	98.682	45.868	62.429	560.574	0	0	215.552	280.612	576.652	32.319	13.495	200.774	23.705	1.583	6.157	63.025	130.175	59.798	57.038	9.683	1.192	0	0	11.12	46.282	0	42.27	136.013	4.754	76.793	28.723	0	9.226	81.779
NMP7	0	38.561	7.999	5.806	100.668	117.268	47.586	69.507	559.381	0.571	0	229.19	297.232	585.85	32.48	13.49	204.379	26.172	1.632	6.017	68.143	138.662	61.942	62.541	9.023	0.583	0	0	12.712	47.244	0.536	44.781	164.908	4.813	82.403	29.286	0	7.963	135.57
NMD0	0	37.157	1.727	5.375	96.665	90.776	50.237	0	611.77	0	0	208.737	273.854	572.272	25.13	13.347	199.511	22.745	1.651	43.258	61.527	128.064	56.598	53.627	0	0.979	0.309	0	8.591	46.167	0	37.283	127.97	5.214	75.308	27.915	0	5.569	61.829
NMCB1	0	60.629	4.034	5.572	95.53	94.264	48.35	0	597.232	0	0.313	210.16	277.395	570.226	45.781	13.428	199.223	22.774	1.639	54.719	60.884	129.182	55.646	53.968	0	0.979	0.391	0.096	9.764	47.558	0	40.619	128.362	5.203	75.055	28.724	0	5.564	64.538
NMCB2	0	100.957	7.963	5.729	93.029	98.999	45.409	107.82	523.247	0	0	208.545	267.065	559.083	31.952	13.014	195.405	23.287	1.522	4.474	60.558	129.245	56.778	54.721	10.383	0.388	0.228	0	13.962	46.061	0	43.374	128.547	4.439	73.169	28.044	0	5.381	71.192
NMCB3	0	144.189	10.526	5.84	104.584	106.489	52.158	92.657	564.133	0.32	0	218.394	287.913	587.101	32.26	13.366	205.581	26.745	2.157	6.518	68.97	142.722	62.646	60.348	12.721	0	0	0.383	18.041	48.519	0.085	41.982	139.379	4.569	78.922	28.691	0	6.873	82.21
NMCB5	8.226	157.85	14.999	5.833	109.192	113.389	53.222	106.413	564.883	0	0.319	228.198	309.973	610.619	33.534	13.816	214.614	29.089	1.595	5.139	70.377	150.179	65.644	63.308	13.513	0	0	0.174	20.706	50.328	0	50.584	148.6	4.682	81.384	29.581	0	6.6	81.223
NMCB7	6.086	166.805	21.038	5.76	105.204	128.86	48.354	150.085	511.728	0	0	231.791	311.456	593.111	33.803	13.304	210.643	29.794	1.672	7.289	69.634	148.596	62.35	63.799	12.52	1.248	0	0	21.385	49.957	0	60.001	172.349	4.503	81.001	29.546	0	5.237	119.479
NMP1	0	38.2	2.381	5.491	96.622	91.282	49.983	28.879	609.671	0	0.389	210.855	282.223	574.367	32.52	13.483	200.905	23.001	1.676	53.553	62.333	129.868	57.248	54.44	9.295	1.008	0	0	9.434	46.392	0	38.665	129.439	5.276	75.489	28.256	0	7.018	62.238
QAP0	0	47.196	2.004	10.644	155.128	116.587	50.086	46.411	574.328	1.459	1.078	188.696	289.27	534.062	37.003	27.037	253.587	24.672	1.525	20.421	58.946	126.013	55.904	54.395	5.79	1.373	0	0	8.029	51.485	0	56.915	189.131	7.062	71.246	43.65	0	5.511	95.946
QACB1	0	78.153	3.84	10.396	149.667	113.784	47.787	54.957	549.399	0.955	1.097	183.537	283.276	517.286	35.828	26.128	245.129	23.957	1.435	14.301	57.056	123.42	53.626	52.751	6.071	1.366	0.466	0	9.08	50.201	0	56.095	182.445	6.827	68.834	42.344	0	5.874	92.811
QACB2	0	134.883	7.779	10.606	152.838	125.385	48.753	68.536	554.511	0.637	1.142	192.481	297.432	530.079	36.343	26.769	250.678	26.858	1.529	15.19	60.807	131.325	55.446	56.125	7.243	1.419	0.445	0.274	12.01	53.146	0.161	58.568	208.296	6.94	71.741	43.091	0	5.705	143.04
QACB3	0	156.084	11.326	10.199	149.05	123.214	48.157	77.797	524.599	0.143	1.076	184.413	287.438	510.085	34.449	24.928	240.886	26.931	1.435	15.265	59.488	129.832	55.389	55.675	7.481	1.269	0.371	0.077	14.694	50.585	0.083	55.842	192.051	6.539	69.2	40.867	0	5.328	118.46
QACB5	0	188.243	16.584	10.316	154.536	128.38	49.834	95.022	518.661	0.941	1.068	187.212	295.621	518.146	34.446	25.096	244.938	28.521	1.37	14.284	61.923	135.824	57.208	57.811	8.113	1.317	0	0.019	19.517	51.246	0.08	57.982	187.542	6.62	70.057	40.738	0	5.354	99.88
QACB7	0	222.432	24.03	11.59	174.968	149.326	54.963	117.578	555.467	1.122	1.242	211.945	335.586	583.4	38.424	27.933	275.273	32.716	1.55	20.101	71.621	155.971	64.043	66.742	9.3	1.494	0	0.444	23.212	58.141	0	69.745	214.752	7.338	79.727	46.004	0	4.721	113.945
QAP1	0	47.886	2.626	10.906	156.427	118.495	50.171	49.472	578.222	0.523	1.147	191.93	296.56	542.679	37.636	27.53	257.502	24.998	1.543	21.917	59.734	128.081	57.362	55.272	5.878	1.449	0.453	0.07	8.337	52.121	0.114	58.049	192.23	7.161	72.541	44.339	0	7.088	97.429
QAP2	0	49.095	3.163	11.235	159.902	121.174	50.557	51.986	588.316	0.643	1.212	195.908	304.152	553.972	38.458	28.094	262.908	25.555	1.557	18.172	61.142	130.818	57.958	56.578	6.099	1.424	0.363	0	8.624	53.738	0	59.607	196.766	7.354	74.22	45.29	0	7.374	99.556
QAP3	0	48.689	3.741	10.985	155.526	118.591	48.442	53.291	566.873	0.663	1.144	190.748	302.915	539.196	37.456	27.314	255.662	24.923	1.508	17.452	59.407	127.126	57.018	55.103	5.913	1.533	0.443	0	8.614	52.366	0	58.56	191.213	7.175	72.278	43.937	0	7.438	96.341
QAP5	0	48.222	4.531	11.178	157.616	120.771	47.851	60.61	568.59	0.433	1.196	194.332	305.584	547.41	38.019	27.766	260.518	25.285	1.543	16.894	60.712	129.954	57.022	56.164	5.917	1.471	0.092	0.136	8.653	53.129	0	60.424	194.59	7.335	73.613	44.836	0	7.26	97.651
QAP7	0	46.489	5.493	10.792	153.606	127.212	44.967	61.912	541.727	0	1.106	187.32	301.386	531.279	40.385	26.632	251.103	24.414	1.48	18.13	58.911	125.392	55.24	54.191	5.796	1.432	0	0.072	8.491	51.438	0	59.084	188.14	7.07	73.338	43.343	0	6.407	94.856
Amino Acid	PSER	TAU2	ASP2	HYP2	THR2	SER2	ASN2	GLU2	GLN2	SAR	AAD	PRO2	GLY2	ALA2	CIT2	ABU	VAL2	MET2	ALLISO	CYS2	ILE2	LEU2	TYR2	PHE2	BALA2	BABA	GBA	HCY	ETN	TRP2	HYL	ORN2	LYS2	1MHIS	HIS2	3MHIS	ANSP	CARSN	ARG2
NMP2	0	38.759	3.466	5.684	96.246	91.435	47.994	47.817	576.044	0	0.415	210.756	270.91	571.115	32.105	13.38	199.333	23.136	1.581	7.13	62.874	129.441	59.156	54.281	9.29	0.777	0	0	10.645	45.909	0	39.869	127.485	4.618	74.836	28.468	0	9.624	66.225
NMP3	0	37.385	3.929	5.575	93.917	88.912	45.467	51.482	557.267	0.963	0	206.432	266.994	556.015	31.341	13.133	194.341	22.7	1.513	4.68	61.442	126.56	57.645	53.832	8.927	0	0	0	10.519	45.21	0	39.188	125.249	4.486	73.412	27.728	0	8.81	67.972
NMP5	0	38.672	5.34	5.814	97.148	98.682	45.868	62.429	560.574	0	0	215.552	280.612	576.652	32.319	13.495	200.774	23.705	1.583	6.157	63.025	130.175	59.798	57.038	9.683	1.192	0	0	11.12	46.282	0	42.27	136.013	4.754	76.793	28.723	0	9.226	81.779
NMP7	0	38.561	7.999	5.806	100.668	117.268	47.586	69.507	559.381	0.571	0	229.19	297.232	585.85	32.48	13.49	204.379	26.172	1.632	6.017	68.143	138.662	61.942	62.541	9.023	0.583	0	0	12.712	47.244	0.536	44.781	164.908	4.813	82.403	29.286	0	7.963	135.57
NMD0	0	37.157	1.727	5.375	96.665	90.776	50.237	0	611.77	0	0	208.737	273.854	572.272	25.13	13.347	199.511	22.745	1.651	43.258	61.527	128.064	56.598	53.627	0	0.979	0.309	0	8.591	46.167	0	37.283	127.97	5.214	75.308	27.915	0	5.569	61.829
NMCB1	0	60.629	4.034	5.572	95.53	94.264	48.35	0	597.232	0	0.313	210.16	277.395	570.226	45.781	13.428	199.223	22.774	1.639	54.719	60.884	129.182	55.646	53.968	0	0.979	0.391	0.096	9.764	47.558	0	40.619	128.362	5.203	75.055	28.724	0	5.564	64.538
NMCB2	0	100.957	7.963	5.729	93.029	98.999	45.409	107.82	523.247	0	0	208.545	267.065	559.083	31.952	13.014	195.405	23.287	1.522	4.474	60.558	129.245	56.778	54.721	10.383	0.388	0.228	0	13.962	46.061	0	43.374	128.547	4.439	73.169	28.044	0	5.381	71.192
NMCB3	0	144.189	10.526	5.84	104.584	106.489	52.158	92.657	564.133	0.32	0	218.394	287.913	587.101	32.26	13.366	205.581	26.745	2.157	6.518	68.97	142.722	62.646	60.348	12.721	0	0	0.383	18.041	48.519	0.085	41.982	139.379	4.569	78.922	28.691	0	6.873	82.21
NMCB5	8.226	157.85	14.999	5.833	109.192	113.389	53.222	106.413	564.883	0	0.319	228.198	309.973	610.619	33.534	13.816	214.614	29.089	1.595	5.139	70.377	150.179	65.644	63.308	13.513	0	0	0.174	20.706	50.328	0	50.584	148.6	4.682	81.384	29.581	0	6.6	81.223
NMCB7	6.086	166.805	21.038	5.76	105.204	128.86	48.354	150.085	511.728	0	0	231.791	311.456	593.111	33.803	13.304	210.643	29.794	1.672	7.289	69.634	148.596	62.35	63.799	12.52	1.248	0	0	21.385	49.957	0	60.001	172.349	4.503	81.001	29.546	0	5.237	119.479
NMP1	0	38.2	2.381	5.491	96.622	91.282	49.983	28.879	609.671	0	0.389	210.855	282.223	574.367	32.52	13.483	200.905	23.001	1.676	53.553	62.333	129.868	57.248	54.44	9.295	1.008	0	0	9.434	46.392	0	38.665	129.439	5.276	75.489	28.256	0	7.018	62.238
QAP0	0	47.196	2.004	10.644	155.128	116.587	50.086	46.411	574.328	1.459	1.078	188.696	289.27	534.062	37.003	27.037	253.587	24.672	1.525	20.421	58.946	126.013	55.904	54.395	5.79	1.373	0	0	8.029	51.485	0	56.915	189.131	7.062	71.246	43.65	0	5.511	95.946
QACB1	0	78.153	3.84	10.396	149.667	113.784	47.787	54.957	549.399	0.955	1.097	183.537	283.276	517.286	35.828	26.128	245.129	23.957	1.435	14.301	57.056	123.42	53.626	52.751	6.071	1.366	0.466	0	9.08	50.201	0	56.095	182.445	6.827	68.834	42.344	0	5.874	92.811
QACB2	0	134.883	7.779	10.606	152.838	125.385	48.753	68.536	554.511	0.637	1.142	192.481	297.432	530.079	36.343	26.769	250.678	26.858	1.529	15.19	60.807	131.325	55.446	56.125	7.243	1.419	0.445	0.274	12.01	53.146	0.161	58.568	208.296	6.94	71.741	43.091	0	5.705	143.04
QACB3	0	156.084	11.326	10.199	149.05	123.214	48.157	77.797	524.599	0.143	1.076	184.413	287.438	510.085	34.449	24.928	240.886	26.931	1.435	15.265	59.488	129.832	55.389	55.675	7.481	1.269	0.371	0.077	14.694	50.585	0.083	55.842	192.051	6.539	69.2	40.867	0	5.328	118.46
QACB5	0	188.243	16.584	10.316	154.536	128.38	49.834	95.022	518.661	0.941	1.068	187.212	295.621	518.146	34.446	25.096	244.938	28.521	1.37	14.284	61.923	135.824	57.208	57.811	8.113	1.317	0	0.019	19.517	51.246	0.08	57.982	187.542	6.62	70.057	40.738	0	5.354	99.88
QACB7	0	222.432	24.03	11.59	174.968	149.326	54.963	117.578	555.467	1.122	1.242	211.945	335.586	583.4	38.424	27.933	275.273	32.716	1.55	20.101	71.621	155.971	64.043	66.742	9.3	1.494	0	0.444	23.212	58.141	0	69.745	214.752	7.338	79.727	46.004	0	4.721	113.945
QAP1	0	47.886	2.626	10.906	156.427	118.495	50.171	49.472	578.222	0.523	1.147	191.93	296.56	542.679	37.636	27.53	257.502	24.998	1.543	21.917	59.734	128.081	57.362	55.272	5.878	1.449	0.453	0.07	8.337	52.121	0.114	58.049	192.23	7.161	72.541	44.339	0	7.088	97.429
QAP2	0	49.095	3.163	11.235	159.902	121.174	50.557	51.986	588.316	0.643	1.212	195.908	304.152	553.972	38.458	28.094	262.908	25.555	1.557	18.172	61.142	130.818	57.958	56.578	6.099	1.424	0.363	0	8.624	53.738	0	59.607	196.766	7.354	74.22	45.29	0	7.374	99.556
QAP3	0	48.689	3.741	10.985	155.526	118.591	48.442	53.291	566.873	0.663	1.144	190.748	302.915	539.196	37.456	27.314	255.662	24.923	1.508	17.452	59.407	127.126	57.018	55.103	5.913	1.533	0.443	0	8.614	52.366	0	58.56	191.213	7.175	72.278	43.937	0	7.438	96.341
QAP5	0	48.222	4.531	11.178	157.616	120.771	47.851	60.61	568.59	0.433	1.196	194.332	305.584	547.41	38.019	27.766	260.518	25.285	1.543	16.894	60.712	129.954	57.022	56.164	5.917	1.471	0.092	0.136	8.653	53.129	0	60.424	194.59	7.335	73.613	44.836	0	7.26	97.651
QAP7	0	46.489	5.493	10.792	153.606	127.212	44.967	61.912	541.727	0	1.106	187.32	301.386	531.279	40.385	26.632	251.103	24.414	1.48	18.13	58.911	125.392	55.24	54.191	5.796	1.432	0	0.072	8.491	51.438	0	59.084	188.14	7.07	73.338	43.343	0	6.407	94.856
Amino Acid	PSER	TAU2	ASP2	HYP2	THR2	SER2	ASN2	GLU2	GLN2	SAR	AAD	PRO2	GLY2	ALA2	CIT2	ABU	VAL2	MET2	ALLISO	CYS2	ILE2	LEU2	TYR2	PHE2	BALA2	BABA	GBA	HCY	ETN	TRP2	HYL	ORN2	LYS2	1MHIS	HIS2	3MHIS	ANSP	CARSN	ARG2
NMP2	0	38.759	3.466	5.684	96.246	91.435	47.994	47.817	576.044	0	0.415	210.756	270.91	571.115	32.105	13.38	199.333	23.136	1.581	7.13	62.874	129.441	59.156	54.281	9.29	0.777	0	0	10.645	45.909	0	39.869	127.485	4.618	74.836	28.468	0	9.624	66.225
NMP3	0	37.385	3.929	5.575	93.917	88.912	45.467	51.482	557.267	0.963	0	206.432	266.994	556.015	31.341	13.133	194.341	22.7	1.513	4.68	61.442	126.56	57.645	53.832	8.927	0	0	0	10.519	45.21	0	39.188	125.249	4.486	73.412	27.728	0	8.81	67.972
NMP5	0	38.672	5.34	5.814	97.148	98.682	45.868	62.429	560.574	0	0	215.552	280.612	576.652	32.319	13.495	200.774	23.705	1.583	6.157	63.025	130.175	59.798	57.038	9.683	1.192	0	0	11.12	46.282	0	42.27	136.013	4.754	76.793	28.723	0	9.226	81.779
NMP7	0	38.561	7.999	5.806	100.668	117.268	47.586	69.507	559.381	0.571	0	229.19	297.232	585.85	32.48	13.49	204.379	26.172	1.632	6.017	68.143	138.662	61.942	62.541	9.023	0.583	0	0	12.712	47.244	0.536	44.781	164.908	4.813	82.403	29.286	0	7.963	135.57
NMD0	0	37.157	1.727	5.375	96.665	90.776	50.237	0	611.77	0	0	208.737	273.854	572.272	25.13	13.347	199.511	22.745	1.651	43.258	61.527	128.064	56.598	53.627	0	0.979	0.309	0	8.591	46.167	0	37.283	127.97	5.214	75.308	27.915	0	5.569	61.829
NMCB1	0	60.629	4.034	5.572	95.53	94.264	48.35	0	597.232	0	0.313	210.16	277.395	570.226	45.781	13.428	199.223	22.774	1.639	54.719	60.884	129.182	55.646	53.968	0	0.979	0.391	0.096	9.764	47.558	0	40.619	128.362	5.203	75.055	28.724	0	5.564	64.538
NMCB2	0	100.957	7.963	5.729	93.029	98.999	45.409	107.82	523.247	0	0	208.545	267.065	559.083	31.952	13.014	195.405	23.287	1.522	4.474	60.558	129.245	56.778	54.721	10.383	0.388	0.228	0	13.962	46.061	0	43.374	128.547	4.439	73.169	28.044	0	5.381	71.192
NMCB3	0	144.189	10.526	5.84	104.584	106.489	52.158	92.657	564.133	0.32	0	218.394	287.913	587.101	32.26	13.366	205.581	26.745	2.157	6.518	68.97	142.722	62.646	60.348	12.721	0	0	0.383	18.041	48.519	0.085	41.982	139.379	4.569	78.922	28.691	0	6.873	82.21
NMCB5	8.226	157.85	14.999	5.833	109.192	113.389	53.222	106.413	564.883	0	0.319	228.198	309.973	610.619	33.534	13.816	214.614	29.089	1.595	5.139	70.377	150.179	65.644	63.308	13.513	0	0	0.174	20.706	50.328	0	50.584	148.6	4.682	81.384	29.581	0	6.6	81.223
NMCB7	6.086	166.805	21.038	5.76	105.204	128.86	48.354	150.085	511.728	0	0	231.791	311.456	593.111	33.803	13.304	210.643	29.794	1.672	7.289	69.634	148.596	62.35	63.799	12.52	1.248	0	0	21.385	49.957	0	60.001	172.349	4.503	81.001	29.546	0	5.237	119.479
NMP1	0	38.2	2.381	5.491	96.622	91.282	49.983	28.879	609.671	0	0.389	210.855	282.223	574.367	32.52	13.483	200.905	23.001	1.676	53.553	62.333	129.868	57.248	54.44	9.295	1.008	0	0	9.434	46.392	0	38.665	129.439	5.276	75.489	28.256	0	7.018	62.238
QAP0	0	47.196	2.004	10.644	155.128	116.587	50.086	46.411	574.328	1.459	1.078	188.696	289.27	534.062	37.003	27.037	253.587	24.672	1.525	20.421	58.946	126.013	55.904	54.395	5.79	1.373	0	0	8.029	51.485	0	56.915	189.131	7.062	71.246	43.65	0	5.511	95.946
QACB1	0	78.153	3.84	10.396	149.667	113.784	47.787	54.957	549.399	0.955	1.097	183.537	283.276	517.286	35.828	26.128	245.129	23.957	1.435	14.301	57.056	123.42	53.626	52.751	6.071	1.366	0.466	0	9.08	50.201	0	56.095	182.445	6.827	68.834	42.344	0	5.874	92.811
QACB2	0	134.883	7.779	10.606	152.838	125.385	48.753	68.536	554.511	0.637	1.142	192.481	297.432	530.079	36.343	26.769	250.678	26.858	1.529	15.19	60.807	131.325	55.446	56.125	7.243	1.419	0.445	0.274	12.01	53.146	0.161	58.568	208.296	6.94	71.741	43.091	0	5.705	143.04
QACB3	0	156.084	11.326	10.199	149.05	123.214	48.157	77.797	524.599	0.143	1.076	184.413	287.438	510.085	34.449	24.928	240.886	26.931	1.435	15.265	59.488	129.832	55.389	55.675	7.481	1.269	0.371	0.077	14.694	50.585	0.083	55.842	192.051	6.539	69.2	40.867	0	5.328	118.46
QACB5	0	188.243	16.584	10.316	154.536	128.38	49.834	95.022	518.661	0.941	1.068	187.212	295.621	518.146	34.446	25.096	244.938	28.521	1.37	14.284	61.923	135.824	57.208	57.811	8.113	1.317	0	0.019	19.517	51.246	0.08	57.982	187.542	6.62	70.057	40.738	0	5.354	99.88
QACB7	0	222.432	24.03	11.59	174.968	149.326	54.963	117.578	555.467	1.122	1.242	211.945	335.586	583.4	38.424	27.933	275.273	32.716	1.55	20.101	71.621	155.971	64.043	66.742	9.3	1.494	0	0.444	23.212	58.141	0	69.745	214.752	7.338	79.727	46.004	0	4.721	113.945
QAP1	0	47.886	2.626	10.906	156.427	118.495	50.171	49.472	578.222	0.523	1.147	191.93	296.56	542.679	37.636	27.53	257.502	24.998	1.543	21.917	59.734	128.081	57.362	55.272	5.878	1.449	0.453	0.07	8.337	52.121	0.114	58.049	192.23	7.161	72.541	44.339	0	7.088	97.429
QAP2	0	49.095	3.163	11.235	159.902	121.174	50.557	51.986	588.316	0.643	1.212	195.908	304.152	553.972	38.458	28.094	262.908	25.555	1.557	18.172	61.142	130.818	57.958	56.578	6.099	1.424	0.363	0	8.624	53.738	0	59.607	196.766	7.354	74.22	45.29	0	7.374	99.556
QAP3	0	48.689	3.741	10.985	155.526	118.591	48.442	53.291	566.873	0.663	1.144	190.748	302.915	539.196	37.456	27.314	255.662	24.923	1.508	17.452	59.407	127.126	57.018	55.103	5.913	1.533	0.443	0	8.614	52.366	0	58.56	191.213	7.175	72.278	43.937	0	7.438	96.341
QAP5	0	48.222	4.531	11.178	157.616	120.771	47.851	60.61	568.59	0.433	1.196	194.332	305.584	547.41	38.019	27.766	260.518	25.285	1.543	16.894	60.712	129.954	57.022	56.164	5.917	1.471	0.092	0.136	8.653	53.129	0	60.424	194.59	7.335	73.613	44.836	0	7.26	97.651
QAP7	0	46.489	5.493	10.792	153.606	127.212	44.967	61.912	541.727	0	1.106	187.32	301.386	531.279	40.385	26.632	251.103	24.414	1.48	18.13	58.911	125.392	55.24	54.191	5.796	1.432	0	0.072	8.491	51.438	0	59.084	188.14	7.07	73.338	43.343	0	6.407	94.856
Amino Acid	PSER	TAU2	ASP2	HYP2	THR2	SER2	ASN2	GLU2	GLN2	SAR	AAD	PRO2	GLY2	ALA2	CIT2	ABU	VAL2	MET2	ALLISO	CYS2	ILE2	LEU2	TYR2	PHE2	BALA2	BABA	GBA	HCY	ETN	TRP2	HYL	ORN2	LYS2	1MHIS	HIS2	3MHIS	ANSP	CARSN	ARG2
NMP2	0	38.759	3.466	5.684	96.246	91.435	47.994	47.817	576.044	0	0.415	210.756	270.91	571.115	32.105	13.38	199.333	23.136	1.581	7.13	62.874	129.441	59.156	54.281	9.29	0.777	0	0	10.645	45.909	0	39.869	127.485	4.618	74.836	28.468	0	9.624	66.225
NMP3	0	37.385	3.929	5.575	93.917	88.912	45.467	51.482	557.267	0.963	0	206.432	266.994	556.015	31.341	13.133	194.341	22.7	1.513	4.68	61.442	126.56	57.645	53.832	8.927	0	0	0	10.519	45.21	0	39.188	125.249	4.486	73.412	27.728	0	8.81	67.972
NMP5	0	38.672	5.34	5.814	97.148	98.682	45.868	62.429	560.574	0	0	215.552	280.612	576.652	32.319	13.495	200.774	23.705	1.583	6.157	63.025	130.175	59.798	57.038	9.683	1.192	0	0	11.12	46.282	0	42.27	136.013	4.754	76.793	28.723	0	9.226	81.779
NMP7	0	38.561	7.999	5.806	100.668	117.268	47.586	69.507	559.381	0.571	0	229.19	297.232	585.85	32.48	13.49	204.379	26.172	1.632	6.017	68.143	138.662	61.942	62.541	9.023	0.583	0	0	12.712	47.244	0.536	44.781	164.908	4.813	82.403	29.286	0	7.963	135.57
NMD0	0	37.157	1.727	5.375	96.665	90.776	50.237	0	611.77	0	0	208.737	273.854	572.272	25.13	13.347	199.511	22.745	1.651	43.258	61.527	128.064	56.598	53.627	0	0.979	0.309	0	8.591	46.167	0	37.283	127.97	5.214	75.308	27.915	0	5.569	61.829
NMCB1	0	60.629	4.034	5.572	95.53	94.264	48.35	0	597.232	0	0.313	210.16	277.395	570.226	45.781	13.428	199.223	22.774	1.639	54.719	60.884	129.182	55.646	53.968	0	0.979	0.391	0.096	9.764	47.558	0	40.619	128.362	5.203	75.055	28.724	0	5.564	64.538
NMCB2	0	100.957	7.963	5.729	93.029	98.999	45.409	107.82	523.247	0	0	208.545	267.065	559.083	31.952	13.014	195.405	23.287	1.522	4.474	60.558	129.245	56.778	54.721	10.383	0.388	0.228	0	13.962	46.061	0	43.374	128.547	4.439	73.169	28.044	0	5.381	71.192
NMCB3	0	144.189	10.526	5.84	104.584	106.489	52.158	92.657	564.133	0.32	0	218.394	287.913	587.101	32.26	13.366	205.581	26.745	2.157	6.518	68.97	142.722	62.646	60.348	12.721	0	0	0.383	18.041	48.519	0.085	41.982	139.379	4.569	78.922	28.691	0	6.873	82.21
NMCB5	8.226	157.85	14.999	5.833	109.192	113.389	53.222	106.413	564.883	0	0.319	228.198	309.973	610.619	33.534	13.816	214.614	29.089	1.595	5.139	70.377	150.179	65.644	63.308	13.513	0	0	0.174	20.706	50.328	0	50.584	148.6	4.682	81.384	29.581	0	6.6	81.223
NMCB7	6.086	166.805	21.038	5.76	105.204	128.86	48.354	150.085	511.728	0	0	231.791	311.456	593.111	33.803	13.304	210.643	29.794	1.672	7.289	69.634	148.596	62.35	63.799	12.52	1.248	0	0	21.385	49.957	0	60.001	172.349	4.503	81.001	29.546	0	5.237	119.479
NMP1	0	38.2	2.381	5.491	96.622	91.282	49.983	28.879	609.671	0	0.389	210.855	282.223	574.367	32.52	13.483	200.905	23.001	1.676	53.553	62.333	129.868	57.248	54.44	9.295	1.008	0	0	9.434	46.392	0	38.665	129.439	5.276	75.489	28.256	0	7.018	62.238
QAP0	0	47.196	2.004	10.644	155.128	116.587	50.086	46.411	574.328	1.459	1.078	188.696	289.27	534.062	37.003	27.037	253.587	24.672	1.525	20.421	58.946	126.013	55.904	54.395	5.79	1.373	0	0	8.029	51.485	0	56.915	189.131	7.062	71.246	43.65	0	5.511	95.946
QACB1	0	78.153	3.84	10.396	149.667	113.784	47.787	54.957	549.399	0.955	1.097	183.537	283.276	517.286	35.828	26.128	245.129	23.957	1.435	14.301	57.056	123.42	53.626	52.751	6.071	1.366	0.466	0	9.08	50.201	0	56.095	182.445	6.827	68.834	42.344	0	5.874	92.811
QACB2	0	134.883	7.779	10.606	152.838	125.385	48.753	68.536	554.511	0.637	1.142	192.481	297.432	530.079	36.343	26.769	250.678	26.858	1.529	15.19	60.807	131.325	55.446	56.125	7.243	1.419	0.445	0.274	12.01	53.146	0.161	58.568	208.296	6.94	71.741	43.091	0	5.705	143.04
QACB3	0	156.084	11.326	10.199	149.05	123.214	48.157	77.797	524.599	0.143	1.076	184.413	287.438	510.085	34.449	24.928	240.886	26.931	1.435	15.265	59.488	129.832	55.389	55.675	7.481	1.269	0.371	0.077	14.694	50.585	0.083	55.842	192.051	6.539	69.2	40.867	0	5.328	118.46
QACB5	0	188.243	16.584	10.316	154.536	128.38	49.834	95.022	518.661	0.941	1.068	187.212	295.621	518.146	34.446	25.096	244.938	28.521	1.37	14.284	61.923	135.824	57.208	57.811	8.113	1.317	0	0.019	19.517	51.246	0.08	57.982	187.542	6.62	70.057	40.738	0	5.354	99.88
QACB7	0	222.432	24.03	11.59	174.968	149.326	54.963	117.578	555.467	1.122	1.242	211.945	335.586	583.4	38.424	27.933	275.273	32.716	1.55	20.101	71.621	155.971	64.043	66.742	9.3	1.494	0	0.444	23.212	58.141	0	69.745	214.752	7.338	79.727	46.004	0	4.721	113.945
QAP1	0	47.886	2.626	10.906	156.427	118.495	50.171	49.472	578.222	0.523	1.147	191.93	296.56	542.679	37.636	27.53	257.502	24.998	1.543	21.917	59.734	128.081	57.362	55.272	5.878	1.449	0.453	0.07	8.337	52.121	0.114	58.049	192.23	7.161	72.541	44.339	0	7.088	97.429
QAP2	0	49.095	3.163	11.235	159.902	121.174	50.557	51.986	588.316	0.643	1.212	195.908	304.152	553.972	38.458	28.094	262.908	25.555	1.557	18.172	61.142	130.818	57.958	56.578	6.099	1.424	0.363	0	8.624	53.738	0	59.607	196.766	7.354	74.22	45.29	0	7.374	99.556
QAP3	0	48.689	3.741	10.985	155.526	118.591	48.442	53.291	566.873	0.663	1.144	190.748	302.915	539.196	37.456	27.314	255.662	24.923	1.508	17.452	59.407	127.126	57.018	55.103	5.913	1.533	0.443	0	8.614	52.366	0	58.56	191.213	7.175	72.278	43.937	0	7.438	96.341
QAP5	0	48.222	4.531	11.178	157.616	120.771	47.851	60.61	568.59	0.433	1.196	194.332	305.584	547.41	38.019	27.766	260.518	25.285	1.543	16.894	60.712	129.954	57.022	56.164	5.917	1.471	0.092	0.136	8.653	53.129	0	60.424	194.59	7.335	73.613	44.836	0	7.26	97.651
QAP7	0	46.489	5.493	10.792	153.606	127.212	44.967	61.912	541.727	0	1.106	187.32	301.386	531.279	40.385	26.632	251.103	24.414	1.48	18.13	58.911	125.392	55.24	54.191	5.796	1.432	0	0.072	8.491	51.438	0	59.084	188.14	7.07	73.338	43.343	0	6.407	94.856
Amino Acid	PSER	TAU2	ASP2	HYP2	THR2	SER2	ASN2	GLU2	GLN2	SAR	AAD	PRO2	GLY2	ALA2	CIT2	ABU	VAL2	MET2	ALLISO	CYS2	ILE2	LEU2	TYR2	PHE2	BALA2	BABA	GBA	HCY	ETN	TRP2	HYL	ORN2	LYS2	1MHIS	HIS2	3MHIS	ANSP	CARSN	ARG2
NMP2	0	38.759	3.466	5.684	96.246	91.435	47.994	47.817	576.044	0	0.415	210.756	270.91	571.115	32.105	13.38	199.333	23.136	1.581	7.13	62.874	129.441	59.156	54.281	9.29	0.777	0	0	10.645	45.909	0	39.869	127.485	4.618	74.836	28.468	0	9.624	66.225
NMP3	0	37.385	3.929	5.575	93.917	88.912	45.467	51.482	557.267	0.963	0	206.432	266.994	556.015	31.341	13.133	194.341	22.7	1.513	4.68	61.442	126.56	57.645	53.832	8.927	0	0	0	10.519	45.21	0	39.188	125.249	4.486	73.412	27.728	0	8.81	67.972
NMP5	0	38.672	5.34	5.814	97.148	98.682	45.868	62.429	560.574	0	0	215.552	280.612	576.652	32.319	13.495	200.774	23.705	1.583	6.157	63.025	130.175	59.798	57.038	9.683	1.192	0	0	11.12	46.282	0	42.27	136.013	4.754	76.793	28.723	0	9.226	81.779
NMP7	0	38.561	7.999	5.806	100.668	117.268	47.586	69.507	559.381	0.571	0	229.19	297.232	585.85	32.48	13.49	204.379	26.172	1.632	6.017	68.143	138.662	61.942	62.541	9.023	0.583	0	0	12.712	47.244	0.536	44.781	164.908	4.813	82.403	29.286	0	7.963	135.57
NMD0	0	37.157	1.727	5.375	96.665	90.776	50.237	0	611.77	0	0	208.737	273.854	572.272	25.13	13.347	199.511	22.745	1.651	43.258	61.527	128.064	56.598	53.627	0	0.979	0.309	0	8.591	46.167	0	37.283	127.97	5.214	75.308	27.915	0	5.569	61.829
NMCB1	0	60.629	4.034	5.572	95.53	94.264	48.35	0	597.232	0	0.313	210.16	277.395	570.226	45.781	13.428	199.223	22.774	1.639	54.719	60.884	129.182	55.646	53.968	0	0.979	0.391	0.096	9.764	47.558	0	40.619	128.362	5.203	75.055	28.724	0	5.564	64.538
NMCB2	0	100.957	7.963	5.729	93.029	98.999	45.409	107.82	523.247	0	0	208.545	267.065	559.083	31.952	13.014	195.405	23.287	1.522	4.474	60.558	129.245	56.778	54.721	10.383	0.388	0.228	0	13.962	46.061	0	43.374	128.547	4.439	73.169	28.044	0	5.381	71.192
NMCB3	0	144.189	10.526	5.84	104.584	106.489	52.158	92.657	564.133	0.32	0	218.394	287.913	587.101	32.26	13.366	205.581	26.745	2.157	6.518	68.97	142.722	62.646	60.348	12.721	0	0	0.383	18.041	48.519	0.085	41.982	139.379	4.569	78.922	28.691	0	6.873	82.21
NMCB5	8.226	157.85	14.999	5.833	109.192	113.389	53.222	106.413	564.883	0	0.319	228.198	309.973	610.619	33.534	13.816	214.614	29.089	1.595	5.139	70.377	150.179	65.644	63.308	13.513	0	0	0.174	20.706	50.328	0	50.584	148.6	4.682	81.384	29.581	0	6.6	81.223
NMCB7	6.086	166.805	21.038	5.76	105.204	128.86	48.354	150.085	511.728	0	0	231.791	311.456	593.111	33.803	13.304	210.643	29.794	1.672	7.289	69.634	148.596	62.35	63.799	12.52	1.248	0	0	21.385	49.957	0	60.001	172.349	4.503	81.001	29.546	0	5.237	119.479
NMP1	0	38.2	2.381	5.491	96.622	91.282	49.983	28.879	609.671	0	0.389	210.855	282.223	574.367	32.52	13.483	200.905	23.001	1.676	53.553	62.333	129.868	57.248	54.44	9.295	1.008	0	0	9.434	46.392	0	38.665	129.439	5.276	75.489	28.256	0	7.018	62.238
QAP0	0	47.196	2.004	10.644	155.128	116.587	50.086	46.411	574.328	1.459	1.078	188.696	289.27	534.062	37.003	27.037	253.587	24.672	1.525	20.421	58.946	126.013	55.904	54.395	5.79	1.373	0	0	8.029	51.485	0	56.915	189.131	7.062	71.246	43.65	0	5.511	95.946
QACB1	0	78.153	3.84	10.396	149.667	113.784	47.787	54.957	549.399	0.955	1.097	183.537	283.276	517.286	35.828	26.128	245.129	23.957	1.435	14.301	57.056	123.42	53.626	52.751	6.071	1.366	0.466	0	9.08	50.201	0	56.095	182.445	6.827	68.834	42.344	0	5.874	92.811
QACB2	0	134.883	7.779	10.606	152.838	125.385	48.753	68.536	554.511	0.637	1.142	192.481	297.432	530.079	36.343	26.769	250.678	26.858	1.529	15.19	60.807	131.325	55.446	56.125	7.243	1.419	0.445	0.274	12.01	53.146	0.161	58.568	208.296	6.94	71.741	43.091	0	5.705	143.04
QACB3	0	156.084	11.326	10.199	149.05	123.214	48.157	77.797	524.599	0.143	1.076	184.413	287.438	510.085	34.449	24.928	240.886	26.931	1.435	15.265	59.488	129.832	55.389	55.675	7.481	1.269	0.371	0.077	14.694	50.585	0.083	55.842	192.051	6.539	69.2	40.867	0	5.328	118.46
QACB5	0	188.243	16.584	10.316	154.536	128.38	49.834	95.022	518.661	0.941	1.068	187.212	295.621	518.146	34.446	25.096	244.938	28.521	1.37	14.284	61.923	135.824	57.208	57.811	8.113	1.317	0	0.019	19.517	51.246	0.08	57.982	187.542	6.62	70.057	40.738	0	5.354	99.88
QACB7	0	222.432	24.03	11.59	174.968	149.326	54.963	117.578	555.467	1.122	1.242	211.945	335.586	583.4	38.424	27.933	275.273	32.716	1.55	20.101	71.621	155.971	64.043	66.742	9.3	1.494	0	0.444	23.212	58.141	0	69.745	214.752	7.338	79.727	46.004	0	4.721	113.945
QAP1	0	47.886	2.626	10.906	156.427	118.495	50.171	49.472	578.222	0.523	1.147	191.93	296.56	542.679	37.636	27.53	257.502	24.998	1.543	21.917	59.734	128.081	57.362	55.272	5.878	1.449	0.453	0.07	8.337	52.121	0.114	58.049	192.23	7.161	72.541	44.339	0	7.088	97.429
QAP2	0	49.095	3.163	11.235	159.902	121.174	50.557	51.986	588.316	0.643	1.212	195.908	304.152	553.972	38.458	28.094	262.908	25.555	1.557	18.172	61.142	130.818	57.958	56.578	6.099	1.424	0.363	0	8.624	53.738	0	59.607	196.766	7.354	74.22	45.29	0	7.374	99.556
QAP3	0	48.689	3.741	10.985	155.526	118.591	48.442	53.291	566.873	0.663	1.144	190.748	302.915	539.196	37.456	27.314	255.662	24.923	1.508	17.452	59.407	127.126	57.018	55.103	5.913	1.533	0.443	0	8.614	52.366	0	58.56	191.213	7.175	72.278	43.937	0	7.438	96.341
QAP5	0	48.222	4.531	11.178	157.616	120.771	47.851	60.61	568.59	0.433	1.196	194.332	305.584	547.41	38.019	27.766	260.518	25.285	1.543	16.894	60.712	129.954	57.022	56.164	5.917	1.471	0.092	0.136	8.653	53.129	0	60.424	194.59	7.335	73.613	44.836	0	7.26	97.651
QAP7	0	46.489	5.493	10.792	153.606	127.212	44.967	61.912	541.727	0	1.106	187.32	301.386	531.279	40.385	26.632	251.103	24.414	1.48	18.13	58.911	125.392	55.24	54.191	5.796	1.432	0	0.072	8.491	51.438	0	59.084	188.14	7.07	73.338	43.343	0	6.407	94.856
Amino Acid	PSER	TAU2	ASP2	HYP2	THR2	SER2	ASN2	GLU2	GLN2	SAR	AAD	PRO2	GLY2	ALA2	CIT2	ABU	VAL2	MET2	ALLISO	CYS2	ILE2	LEU2	TYR2	PHE2	BALA2	BABA	GBA	HCY	ETN	TRP2	HYL	ORN2	LYS2	1MHIS	HIS2	3MHIS	ANSP	CARSN	ARG2
NMP2	0	38.759	3.466	5.684	96.246	91.435	47.994	47.817	576.044	0	0.415	210.756	270.91	571.115	32.105	13.38	199.333	23.136	1.581	7.13	62.874	129.441	59.156	54.281	9.29	0.777	0	0	10.645	45.909	0	39.869	127.485	4.618	74.836	28.468	0	9.624	66.225
NMP3	0	37.385	3.929	5.575	93.917	88.912	45.467	51.482	557.267	0.963	0	206.432	266.994	556.015	31.341	13.133	194.341	22.7	1.513	4.68	61.442	126.56	57.645	53.832	8.927	0	0	0	10.519	45.21	0	39.188	125.249	4.486	73.412	27.728	0	8.81	67.972
NMP5	0	38.672	5.34	5.814	97.148	98.682	45.868	62.429	560.574	0	0	215.552	280.612	576.652	32.319	13.495	200.774	23.705	1.583	6.157	63.025	130.175	59.798	57.038	9.683	1.192	0	0	11.12	46.282	0	42.27	136.013	4.754	76.793	28.723	0	9.226	81.779
NMP7	0	38.561	7.999	5.806	100.668	117.268	47.586	69.507	559.381	0.571	0	229.19	297.232	585.85	32.48	13.49	204.379	26.172	1.632	6.017	68.143	138.662	61.942	62.541	9.023	0.583	0	0	12.712	47.244	0.536	44.781	164.908	4.813	82.403	29.286	0	7.963	135.57
NMD0	0	37.157	1.727	5.375	96.665	90.776	50.237	0	611.77	0	0	208.737	273.854	572.272	25.13	13.347	199.511	22.745	1.651	43.258	61.527	128.064	56.598	53.627	0	0.979	0.309	0	8.591	46.167	0	37.283	127.97	5.214	75.308	27.915	0	5.569	61.829
NMCB1	0	60.629	4.034	5.572	95.53	94.264	48.35	0	597.232	0	0.313	210.16	277.395	570.226	45.781	13.428	199.223	22.774	1.639	54.719	60.884	129.182	55.646	53.968	0	0.979	0.391	0.096	9.764	47.558	0	40.619	128.362	5.203	75.055	28.724	0	5.564	64.538
NMCB2	0	100.957	7.963	5.729	93.029	98.999	45.409	107.82	523.247	0	0	208.545	267.065	559.083	31.952	13.014	195.405	23.287	1.522	4.474	60.558	129.245	56.778	54.721	10.383	0.388	0.228	0	13.962	46.061	0	43.374	128.547	4.439	73.169	28.044	0	5.381	71.192
NMCB3	0	144.189	10.526	5.84	104.584	106.489	52.158	92.657	564.133	0.32	0	218.394	287.913	587.101	32.26	13.366	205.581	26.745	2.157	6.518	68.97	142.722	62.646	60.348	12.721	0	0	0.383	18.041	48.519	0.085	41.982	139.379	4.569	78.922	28.691	0	6.873	82.21
NMCB5	8.226	157.85	14.999	5.833	109.192	113.389	53.222	106.413	564.883	0	0.319	228.198	309.973	610.619	33.534	13.816	214.614	29.089	1.595	5.139	70.377	150.179	65.644	63.308	13.513	0	0	0.174	20.706	50.328	0	50.584	148.6	4.682	81.384	29.581	0	6.6	81.223
NMCB7	6.086	166.805	21.038	5.76	105.204	128.86	48.354	150.085	511.728	0	0	231.791	311.456	593.111	33.803	13.304	210.643	29.794	1.672	7.289	69.634	148.596	62.35	63.799	12.52	1.248	0	0	21.385	49.957	0	60.001	172.349	4.503	81.001	29.546	0	5.237	119.479
NMP1	0	38.2	2.381	5.491	96.622	91.282	49.983	28.879	609.671	0	0.389	210.855	282.223	574.367	32.52	13.483	200.905	23.001	1.676	53.553	62.333	129.868	57.248	54.44	9.295	1.008	0	0	9.434	46.392	0	38.665	129.439	5.276	75.489	28.256	0	7.018	62.238
QAP0	0	47.196	2.004	10.644	155.128	116.587	50.086	46.411	574.328	1.459	1.078	188.696	289.27	534.062	37.003	27.037	253.587	24.672	1.525	20.421	58.946	126.013	55.904	54.395	5.79	1.373	0	0	8.029	51.485	0	56.915	189.131	7.062	71.246	43.65	0	5.511	95.946
QACB1	0	78.153	3.84	10.396	149.667	113.784	47.787	54.957	549.399	0.955	1.097	183.537	283.276	517.286	35.828	26.128	245.129	23.957	1.435	14.301	57.056	123.42	53.626	52.751	6.071	1.366	0.466	0	9.08	50.201	0	56.095	182.445	6.827	68.834	42.344	0	5.874	92.811
QACB2	0	134.883	7.779	10.606	152.838	125.385	48.753	68.536	554.511	0.637	1.142	192.481	297.432	530.079	36.343	26.769	250.678	26.858	1.529	15.19	60.807	131.325	55.446	56.125	7.243	1.419	0.445	0.274	12.01	53.146	0.161	58.568	208.296	6.94	71.741	43.091	0	5.705	143.04
QACB3	0	156.084	11.326	10.199	149.05	123.214	48.157	77.797	524.599	0.143	1.076	184.413	287.438	510.085	34.449	24.928	240.886	26.931	1.435	15.265	59.488	129.832	55.389	55.675	7.481	1.269	0.371	0.077	14.694	50.585	0.083	55.842	192.051	6.539	69.2	40.867	0	5.328	118.46
QACB5	0	188.243	16.584	10.316	154.536	128.38	49.834	95.022	518.661	0.941	1.068	187.212	295.621	518.146	34.446	25.096	244.938	28.521	1.37	14.284	61.923	135.824	57.208	57.811	8.113	1.317	0	0.019	19.517	51.246	0.08	57.982	187.542	6.62	70.057	40.738	0	5.354	99.88
QACB7	0	222.432	24.03	11.59	174.968	149.326	54.963	117.578	555.467	1.122	1.242	211.945	335.586	583.4	38.424	27.933	275.273	32.716	1.55	20.101	71.621	155.971	64.043	66.742	9.3	1.494	0	0.444	23.212	58.141	0	69.745	214.752	7.338	79.727	46.004	0	4.721	113.945
QAP1	0	47.886	2.626	10.906	156.427	118.495	50.171	49.472	578.222	0.523	1.147	191.93	296.56	542.679	37.636	27.53	257.502	24.998	1.543	21.917	59.734	128.081	57.362	55.272	5.878	1.449	0.453	0.07	8.337	52.121	0.114	58.049	192.23	7.161	72.541	44.339	0	7.088	97.429
QAP2	0	49.095	3.163	11.235	159.902	121.174	50.557	51.986	588.316	0.643	1.212	195.908	304.152	553.972	38.458	28.094	262.908	25.555	1.557	18.172	61.142	130.818	57.958	56.578	6.099	1.424	0.363	0	8.624	53.738	0	59.607	196.766	7.354	74.22	45.29	0	7.374	99.556
QAP3	0	48.689	3.741	10.985	155.526	118.591	48.442	53.291	566.873	0.663	1.144	190.748	302.915	539.196	37.456	27.314	255.662	24.923	1.508	17.452	59.407	127.126	57.018	55.103	5.913	1.533	0.443	0	8.614	52.366	0	58.56	191.213	7.175	72.278	43.937	0	7.438	96.341
QAP5	0	48.222	4.531	11.178	157.616	120.771	47.851	60.61	568.59	0.433	1.196	194.332	305.584	547.41	38.019	27.766	260.518	25.285	1.543	16.894	60.712	129.954	57.022	56.164	5.917	1.471	0.092	0.136	8.653	53.129	0	60.424	194.59	7.335	73.613	44.836	0	7.26	97.651
QAP7	0	46.489	5.493	10.792	153.606	127.212	44.967	61.912	541.727	0	1.106	187.32	301.386	531.279	40.385	26.632	251.103	24.414	1.48	18.13	58.911	125.392	55.24	54.191	5.796	1.432	0	0.072	8.491	51.438	0	59.084	188.14	7.07	73.338	43.343	0	6.407	94.856
Amino Acid	PSER	TAU2	ASP2	HYP2	THR2	SER2	ASN2	GLU2	GLN2	SAR	AAD	PRO2	GLY2	ALA2	CIT2	ABU	VAL2	MET2	ALLISO	CYS2	ILE2	LEU2	TYR2	PHE2	BALA2	BABA	GBA	HCY	ETN	TRP2	HYL	ORN2	LYS2	1MHIS	HIS2	3MHIS	ANSP	CARSN	ARG2
NMP2	0	38.759	3.466	5.684	96.246	91.435	47.994	47.817	576.044	0	0.415	210.756	270.91	571.115	32.105	13.38	199.333	23.136	1.581	7.13	62.874	129.441	59.156	54.281	9.29	0.777	0	0	10.645	45.909	0	39.869	127.485	4.618	74.836	28.468	0	9.624	66.225
NMP3	0	37.385	3.929	5.575	93.917	88.912	45.467	51.482	557.267	0.963	0	206.432	266.994	556.015	31.341	13.133	194.341	22.7	1.513	4.68	61.442	126.56	57.645	53.832	8.927	0	0	0	10.519	45.21	0	39.188	125.249	4.486	73.412	27.728	0	8.81	67.972
NMP5	0	38.672	5.34	5.814	97.148	98.682	45.868	62.429	560.574	0	0	215.552	280.612	576.652	32.319	13.495	200.774	23.705	1.583	6.157	63.025	130.175	59.798	57.038	9.683	1.192	0	0	11.12	46.282	0	42.27	136.013	4.754	76.793	28.723	0	9.226	81.779
NMP7	0	38.561	7.999	5.806	100.668	117.268	47.586	69.507	559.381	0.571	0	229.19	297.232	585.85	32.48	13.49	204.379	26.172	1.632	6.017	68.143	138.662	61.942	62.541	9.023	0.583	0	0	12.712	47.244	0.536	44.781	164.908	4.813	82.403	29.286	0	7.963	135.57
NMD0	0	37.157	1.727	5.375	96.665	90.776	50.237	0	611.77	0	0	208.737	273.854	572.272	25.13	13.347	199.511	22.745	1.651	43.258	61.527	128.064	56.598	53.627	0	0.979	0.309	0	8.591	46.167	0	37.283	127.97	5.214	75.308	27.915	0	5.569	61.829
NMCB1	0	60.629	4.034	5.572	95.53	94.264	48.35	0	597.232	0	0.313	210.16	277.395	570.226	45.781	13.428	199.223	22.774	1.639	54.719	60.884	129.182	55.646	53.968	0	0.979	0.391	0.096	9.764	47.558	0	40.619	128.362	5.203	75.055	28.724	0	5.564	64.538
NMCB2	0	100.957	7.963	5.729	93.029	98.999	45.409	107.82	523.247	0	0	208.545	267.065	559.083	31.952	13.014	195.405	23.287	1.522	4.474	60.558	129.245	56.778	54.721	10.383	0.388	0.228	0	13.962	46.061	0	43.374	128.547	4.439	73.169	28.044	0	5.381	71.192
NMCB3	0	144.189	10.526	5.84	104.584	106.489	52.158	92.657	564.133	0.32	0	218.394	287.913	587.101	32.26	13.366	205.581	26.745	2.157	6.518	68.97	142.722	62.646	60.348	12.721	0	0	0.383	18.041	48.519	0.085	41.982	139.379	4.569	78.922	28.691	0	6.873	82.21
NMCB5	8.226	157.85	14.999	5.833	109.192	113.389	53.222	106.413	564.883	0	0.319	228.198	309.973	610.619	33.534	13.816	214.614	29.089	1.595	5.139	70.377	150.179	65.644	63.308	13.513	0	0	0.174	20.706	50.328	0	50.584	148.6	4.682	81.384	29.581	0	6.6	81.223
NMCB7	6.086	166.805	21.038	5.76	105.204	128.86	48.354	150.085	511.728	0	0	231.791	311.456	593.111	33.803	13.304	210.643	29.794	1.672	7.289	69.634	148.596	62.35	63.799	12.52	1.248	0	0	21.385	49.957	0	60.001	172.349	4.503	81.001	29.546	0	5.237	119.479
NMP1	0	38.2	2.381	5.491	96.622	91.282	49.983	28.879	609.671	0	0.389	210.855	282.223	574.367	32.52	13.483	200.905	23.001	1.676	53.553	62.333	129.868	57.248	54.44	9.295	1.008	0	0	9.434	46.392	0	38.665	129.439	5.276	75.489	28.256	0	7.018	62.238
QAP0	0	47.196	2.004	10.644	155.128	116.587	50.086	46.411	574.328	1.459	1.078	188.696	289.27	534.062	37.003	27.037	253.587	24.672	1.525	20.421	58.946	126.013	55.904	54.395	5.79	1.373	0	0	8.029	51.485	0	56.915	189.131	7.062	71.246	43.65	0	5.511	95.946
QACB1	0	78.153	3.84	10.396	149.667	113.784	47.787	54.957	549.399	0.955	1.097	183.537	283.276	517.286	35.828	26.128	245.129	23.957	1.435	14.301	57.056	123.42	53.626	52.751	6.071	1.366	0.466	0	9.08	50.201	0	56.095	182.445	6.827	68.834	42.344	0	5.874	92.811
QACB2	0	134.883	7.779	10.606	152.838	125.385	48.753	68.536	554.511	0.637	1.142	192.481	297.432	530.079	36.343	26.769	250.678	26.858	1.529	15.19	60.807	131.325	55.446	56.125	7.243	1.419	0.445	0.274	12.01	53.146	0.161	58.568	208.296	6.94	71.741	43.091	0	5.705	143.04
QACB3	0	156.084	11.326	10.199	149.05	123.214	48.157	77.797	524.599	0.143	1.076	184.413	287.438	510.085	34.449	24.928	240.886	26.931	1.435	15.265	59.488	129.832	55.389	55.675	7.481	1.269	0.371	0.077	14.694	50.585	0.083	55.842	192.051	6.539	69.2	40.867	0	5.328	118.46
QACB5	0	188.243	16.584	10.316	154.536	128.38	49.834	95.022	518.661	0.941	1.068	187.212	295.621	518.146	34.446	25.096	244.938	28.521	1.37	14.284	61.923	135.824	57.208	57.811	8.113	1.317	0	0.019	19.517	51.246	0.08	57.982	187.542	6.62	70.057	40.738	0	5.354	99.88
QACB7	0	222.432	24.03	11.59	174.968	149.326	54.963	117.578	555.467	1.122	1.242	211.945	335.586	583.4	38.424	27.933	275.273	32.716	1.55	20.101	71.621	155.971	64.043	66.742	9.3	1.494	0	0.444	23.212	58.141	0	69.745	214.752	7.338	79.727	46.004	0	4.721	113.945
QAP1	0	47.886	2.626	10.906	156.427	118.495	50.171	49.472	578.222	0.523	1.147	191.93	296.56	542.679	37.636	27.53	257.502	24.998	1.543	21.917	59.734	128.081	57.362	55.272	5.878	1.449	0.453	0.07	8.337	52.121	0.114	58.049	192.23	7.161	72.541	44.339	0	7.088	97.429
QAP2	0	49.095	3.163	11.235	159.902	121.174	50.557	51.986	588.316	0.643	1.212	195.908	304.152	553.972	38.458	28.094	262.908	25.555	1.557	18.172	61.142	130.818	57.958	56.578	6.099	1.424	0.363	0	8.624	53.738	0	59.607	196.766	7.354	74.22	45.29	0	7.374	99.556
QAP3	0	48.689	3.741	10.985	155.526	118.591	48.442	53.291	566.873	0.663	1.144	190.748	302.915	539.196	37.456	27.314	255.662	24.923	1.508	17.452	59.407	127.126	57.018	55.103	5.913	1.533	0.443	0	8.614	52.366	0	58.56	191.213	7.175	72.278	43.937	0	7.438	96.341
QAP5	0	48.222	4.531	11.178	157.616	120.771	47.851	60.61	568.59	0.433	1.196	194.332	305.584	547.41	38.019	27.766	260.518	25.285	1.543	16.894	60.712	129.954	57.022	56.164	5.917	1.471	0.092	0.136	8.653	53.129	0	60.424	194.59	7.335	73.613	44.836	0	7.26	97.651
QAP7	0	46.489	5.493	10.792	153.606	127.212	44.967	61.912	541.727	0	1.106	187.32	301.386	531.279	40.385	26.632	251.103	24.414	1.48	18.13	58.911	125.392	55.24	54.191	5.796	1.432	0	0.072	8.491	51.438	0	59.084	188.14	7.07	73.338	43.343	0	6.407	94.856
Amino Acid	PSER	TAU2	ASP2	HYP2	THR2	SER2	ASN2	GLU2	GLN2	SAR	AAD	PRO2	GLY2	ALA2	CIT2	ABU	VAL2	MET2	ALLISO	CYS2	ILE2	LEU2	TYR2	PHE2	BALA2	BABA	GBA	HCY	ETN	TRP2	HYL	ORN2	LYS2	1MHIS	HIS2	3MHIS	ANSP	CARSN	ARG2
NMP2	0	38.759	3.466	5.684	96.246	91.435	47.994	47.817	576.044	0	0.415	210.756	270.91	571.115	32.105	13.38	199.333	23.136	1.581	7.13	62.874	129.441	59.156	54.281	9.29	0.777	0	0	10.645	45.909	0	39.869	127.485	4.618	74.836	28.468	0	9.624	66.225
NMP3	0	37.385	3.929	5.575	93.917	88.912	45.467	51.482	557.267	0.963	0	206.432	266.994	556.015	31.341	13.133	194.341	22.7	1.513	4.68	61.442	126.56	57.645	53.832	8.927	0	0	0	10.519	45.21	0	39.188	125.249	4.486	73.412	27.728	0	8.81	67.972
NMP5	0	38.672	5.34	5.814	97.148	98.682	45.868	62.429	560.574	0	0	215.552	280.612	576.652	32.319	13.495	200.774	23.705	1.583	6.157	63.025	130.175	59.798	57.038	9.683	1.192	0	0	11.12	46.282	0	42.27	136.013	4.754	76.793	28.723	0	9.226	81.779
NMP7	0	38.561	7.999	5.806	100.668	117.268	47.586	69.507	559.381	0.571	0	229.19	297.232	585.85	32.48	13.49	204.379	26.172	1.632	6.017	68.143	138.662	61.942	62.541	9.023	0.583	0	0	12.712	47.244	0.536	44.781	164.908	4.813	82.403	29.286	0	7.963	135.57
NMD0	0	37.157	1.727	5.375	96.665	90.776	50.237	0	611.77	0	0	208.737	273.854	572.272	25.13	13.347	199.511	22.745	1.651	43.258	61.527	128.064	56.598	53.627	0	0.979	0.309	0	8.591	46.167	0	37.283	127.97	5.214	75.308	27.915	0	5.569	61.829
NMCB1	0	60.629	4.034	5.572	95.53	94.264	48.35	0	597.232	0	0.313	210.16	277.395	570.226	45.781	13.428	199.223	22.774	1.639	54.719	60.884	129.182	55.646	53.968	0	0.979	0.391	0.096	9.764	47.558	0	40.619	128.362	5.203	75.055	28.724	0	5.564	64.538
NMCB2	0	100.957	7.963	5.729	93.029	98.999	45.409	107.82	523.247	0	0	208.545	267.065	559.083	31.952	13.014	195.405	23.287	1.522	4.474	60.558	129.245	56.778	54.721	10.383	0.388	0.228	0	13.962	46.061	0	43.374	128.547	4.439	73.169	28.044	0	5.381	71.192
NMCB3	0	144.189	10.526	5.84	104.584	106.489	52.158	92.657	564.133	0.32	0	218.394	287.913	587.101	32.26	13.366	205.581	26.745	2.157	6.518	68.97	142.722	62.646	60.348	12.721	0	0	0.383	18.041	48.519	0.085	41.982	139.379	4.569	78.922	28.691	0	6.873	82.21
NMCB5	8.226	157.85	14.999	5.833	109.192	113.389	53.222	106.413	564.883	0	0.319	228.198	309.973	610.619	33.534	13.816	214.614	29.089	1.595	5.139	70.377	150.179	65.644	63.308	13.513	0	0	0.174	20.706	50.328	0	50.584	148.6	4.682	81.384	29.581	0	6.6	81.223
NMCB7	6.086	166.805	21.038	5.76	105.204	128.86	48.354	150.085	511.728	0	0	231.791	311.456	593.111	33.803	13.304	210.643	29.794	1.672	7.289	69.634	148.596	62.35	63.799	12.52	1.248	0	0	21.385	49.957	0	60.001	172.349	4.503	81.001	29.546	0	5.237	119.479
NMP1	0	38.2	2.381	5.491	96.622	91.282	49.983	28.879	609.671	0	0.389	210.855	282.223	574.367	32.52	13.483	200.905	23.001	1.676	53.553	62.333	129.868	57.248	54.44	9.295	1.008	0	0	9.434	46.392	0	38.665	129.439	5.276	75.489	28.256	0	7.018	62.238
QAP0	0	47.196	2.004	10.644	155.128	116.587	50.086	46.411	574.328	1.459	1.078	188.696	289.27	534.062	37.003	27.037	253.587	24.672	1.525	20.421	58.946	126.013	55.904	54.395	5.79	1.373	0	0	8.029	51.485	0	56.915	189.131	7.062	71.246	43.65	0	5.511	95.946
QACB1	0	78.153	3.84	10.396	149.667	113.784	47.787	54.957	549.399	0.955	1.097	183.537	283.276	517.286	35.828	26.128	245.129	23.957	1.435	14.301	57.056	123.42	53.626	52.751	6.071	1.366	0.466	0	9.08	50.201	0	56.095	182.445	6.827	68.834	42.344	0	5.874	92.811
QACB2	0	134.883	7.779	10.606	152.838	125.385	48.753	68.536	554.511	0.637	1.142	192.481	297.432	530.079	36.343	26.769	250.678	26.858	1.529	15.19	60.807	131.325	55.446	56.125	7.243	1.419	0.445	0.274	12.01	53.146	0.161	58.568	208.296	6.94	71.741	43.091	0	5.705	143.04
QACB3	0	156.084	11.326	10.199	149.05	123.214	48.157	77.797	524.599	0.143	1.076	184.413	287.438	510.085	34.449	24.928	240.886	26.931	1.435	15.265	59.488	129.832	55.389	55.675	7.481	1.269	0.371	0.077	14.694	50.585	0.083	55.842	192.051	6.539	69.2	40.867	0	5.328	118.46
QACB5	0	188.243	16.584	10.316	154.536	128.38	49.834	95.022	518.661	0.941	1.068	187.212	295.621	518.146	34.446	25.096	244.938	28.521	1.37	14.284	61.923	135.824	57.208	57.811	8.113	1.317	0	0.019	19.517	51.246	0.08	57.982	187.542	6.62	70.057	40.738	0	5.354	99.88
QACB7	0	222.432	24.03	11.59	174.968	149.326	54.963	117.578	555.467	1.122	1.242	211.945	335.586	583.4	38.424	27.933	275.273	32.716	1.55	20.101	71.621	155.971	64.043	66.742	9.3	1.494	0	0.444	23.212	58.141	0	69.745	214.752	7.338	79.727	46.004	0	4.721	113.945
QAP1	0	47.886	2.626	10.906	156.427	118.495	50.171	49.472	578.222	0.523	1.147	191.93	296.56	542.679	37.636	27.53	257.502	24.998	1.543	21.917	59.734	128.081	57.362	55.272	5.878	1.449	0.453	0.07	8.337	52.121	0.114	58.049	192.23	7.161	72.541	44.339	0	7.088	97.429
QAP2	0	49.095	3.163	11.235	159.902	121.174	50.557	51.986	588.316	0.643	1.212	195.908	304.152	553.972	38.458	28.094	262.908	25.555	1.557	18.172	61.142	130.818	57.958	56.578	6.099	1.424	0.363	0	8.624	53.738	0	59.607	196.766	7.354	74.22	45.29	0	7.374	99.556
QAP3	0	48.689	3.741	10.985	155.526	118.591	48.442	53.291	566.873	0.663	1.144	190.748	302.915	539.196	37.456	27.314	255.662	24.923	1.508	17.452	59.407	127.126	57.018	55.103	5.913	1.533	0.443	0	8.614	52.366	0	58.56	191.213	7.175	72.278	43.937	0	7.438	96.341
QAP5	0	48.222	4.531	11.178	157.616	120.771	47.851	60.61	568.59	0.433	1.196	194.332	305.584	547.41	38.019	27.766	260.518	25.285	1.543	16.894	60.712	129.954	57.022	56.164	5.917	1.471	0.092	0.136	8.653	53.129	0	60.424	194.59	7.335	73.613	44.836	0	7.26	97.651
QAP7	0	46.489	5.493	10.792	153.606	127.212	44.967	61.912	541.727	0	1.106	187.32	301.386	531.279	40.385	26.632	251.103	24.414	1.48	18.13	58.911	125.392	55.24	54.191	5.796	1.432	0	0.072	8.491	51.438	0	59.084	188.14	7.07	73.338	43.343	0	6.407	94.856
Amino Acid	PSER	TAU2	ASP2	HYP2	THR2	SER2	ASN2	GLU2	GLN2	SAR	AAD	PRO2	GLY2	ALA2	CIT2	ABU	VAL2	MET2	ALLISO	CYS2	ILE2	LEU2	TYR2	PHE2	BALA2	BABA	GBA	HCY	ETN	TRP2	HYL	ORN2	LYS2	1MHIS	HIS2	3MHIS	ANSP	CARSN	ARG2
NMP2	0	38.759	3.466	5.684	96.246	91.435	47.994	47.817	576.044	0	0.415	210.756	270.91	571.115	32.105	13.38	199.333	23.136	1.581	7.13	62.874	129.441	59.156	54.281	9.29	0.777	0	0	10.645	45.909	0	39.869	127.485	4.618	74.836	28.468	0	9.624	66.225
NMP3	0	37.385	3.929	5.575	93.917	88.912	45.467	51.482	557.267	0.963	0	206.432	266.994	556.015	31.341	13.133	194.341	22.7	1.513	4.68	61.442	126.56	57.645	53.832	8.927	0	0	0	10.519	45.21	0	39.188	125.249	4.486	73.412	27.728	0	8.81	67.972
NMP5	0	38.672	5.34	5.814	97.148	98.682	45.868	62.429	560.574	0	0	215.552	280.612	576.652	32.319	13.495	200.774	23.705	1.583	6.157	63.025	130.175	59.798	57.038	9.683	1.192	0	0	11.12	46.282	0	42.27	136.013	4.754	76.793	28.723	0	9.226	81.779
NMP7	0	38.561	7.999	5.806	100.668	117.268	47.586	69.507	559.381	0.571	0	229.19	297.232	585.85	32.48	13.49	204.379	26.172	1.632	6.017	68.143	138.662	61.942	62.541	9.023	0.583	0	0	12.712	47.244	0.536	44.781	164.908	4.813	82.403	29.286	0	7.963	135.57
NMD0	0	37.157	1.727	5.375	96.665	90.776	50.237	0	611.77	0	0	208.737	273.854	572.272	25.13	13.347	199.511	22.745	1.651	43.258	61.527	128.064	56.598	53.627	0	0.979	0.309	0	8.591	46.167	0	37.283	127.97	5.214	75.308	27.915	0	5.569	61.829
NMCB1	0	60.629	4.034	5.572	95.53	94.264	48.35	0	597.232	0	0.313	210.16	277.395	570.226	45.781	13.428	199.223	22.774	1.639	54.719	60.884	129.182	55.646	53.968	0	0.979	0.391	0.096	9.764	47.558	0	40.619	128.362	5.203	75.055	28.724	0	5.564	64.538
NMCB2	0	100.957	7.963	5.729	93.029	98.999	45.409	107.82	523.247	0	0	208.545	267.065	559.083	31.952	13.014	195.405	23.287	1.522	4.474	60.558	129.245	56.778	54.721	10.383	0.388	0.228	0	13.962	46.061	0	43.374	128.547	4.439	73.169	28.044	0	5.381	71.192
NMCB3	0	144.189	10.526	5.84	104.584	106.489	52.158	92.657	564.133	0.32	0	218.394	287.913	587.101	32.26	13.366	205.581	26.745	2.157	6.518	68.97	142.722	62.646	60.348	12.721	0	0	0.383	18.041	48.519	0.085	41.982	139.379	4.569	78.922	28.691	0	6.873	82.21
NMCB5	8.226	157.85	14.999	5.833	109.192	113.389	53.222	106.413	564.883	0	0.319	228.198	309.973	610.619	33.534	13.816	214.614	29.089	1.595	5.139	70.377	150.179	65.644	63.308	13.513	0	0	0.174	20.706	50.328	0	50.584	148.6	4.682	81.384	29.581	0	6.6	81.223
NMCB7	6.086	166.805	21.038	5.76	105.204	128.86	48.354	150.085	511.728	0	0	231.791	311.456	593.111	33.803	13.304	210.643	29.794	1.672	7.289	69.634	148.596	62.35	63.799	12.52	1.248	0	0	21.385	49.957	0	60.001	172.349	4.503	81.001	29.546	0	5.237	119.479
NMP1	0	38.2	2.381	5.491	96.622	91.282	49.983	28.879	609.671	0	0.389	210.855	282.223	574.367	32.52	13.483	200.905	23.001	1.676	53.553	62.333	129.868	57.248	54.44	9.295	1.008	0	0	9.434	46.392	0	38.665	129.439	5.276	75.489	28.256	0	7.018	62.238
QAP0	0	47.196	2.004	10.644	155.128	116.587	50.086	46.411	574.328	1.459	1.078	188.696	289.27	534.062	37.003	27.037	253.587	24.672	1.525	20.421	58.946	126.013	55.904	54.395	5.79	1.373	0	0	8.029	51.485	0	56.915	189.131	7.062	71.246	43.65	0	5.511	95.946
QACB1	0	78.153	3.84	10.396	149.667	113.784	47.787	54.957	549.399	0.955	1.097	183.537	283.276	517.286	35.828	26.128	245.129	23.957	1.435	14.301	57.056	123.42	53.626	52.751	6.071	1.366	0.466	0	9.08	50.201	0	56.095	182.445	6.827	68.834	42.344	0	5.874	92.811
QACB2	0	134.883	7.779	10.606	152.838	125.385	48.753	68.536	554.511	0.637	1.142	192.481	297.432	530.079	36.343	26.769	250.678	26.858	1.529	15.19	60.807	131.325	55.446	56.125	7.243	1.419	0.445	0.274	12.01	53.146	0.161	58.568	208.296	6.94	71.741	43.091	0	5.705	143.04
QACB3	0	156.084	11.326	10.199	149.05	123.214	48.157	77.797	524.599	0.143	1.076	184.413	287.438	510.085	34.449	24.928	240.886	26.931	1.435	15.265	59.488	129.832	55.389	55.675	7.481	1.269	0.371	0.077	14.694	50.585	0.083	55.842	192.051	6.539	69.2	40.867	0	5.328	118.46
QACB5	0	188.243	16.584	10.316	154.536	128.38	49.834	95.022	518.661	0.941	1.068	187.212	295.621	518.146	34.446	25.096	244.938	28.521	1.37	14.284	61.923	135.824	57.208	57.811	8.113	1.317	0	0.019	19.517	51.246	0.08	57.982	187.542	6.62	70.057	40.738	0	5.354	99.88
QACB7	0	222.432	24.03	11.59	174.968	149.326	54.963	117.578	555.467	1.122	1.242	211.945	335.586	583.4	38.424	27.933	275.273	32.716	1.55	20.101	71.621	155.971	64.043	66.742	9.3	1.494	0	0.444	23.212	58.141	0	69.745	214.752	7.338	79.727	46.004	0	4.721	113.945
QAP1	0	47.886	2.626	10.906	156.427	118.495	50.171	49.472	578.222	0.523	1.147	191.93	296.56	542.679	37.636	27.53	257.502	24.998	1.543	21.917	59.734	128.081	57.362	55.272	5.878	1.449	0.453	0.07	8.337	52.121	0.114	58.049	192.23	7.161	72.541	44.339	0	7.088	97.429
QAP2	0	49.095	3.163	11.235	159.902	121.174	50.557	51.986	588.316	0.643	1.212	195.908	304.152	553.972	38.458	28.094	262.908	25.555	1.557	18.172	61.142	130.818	57.958	56.578	6.099	1.424	0.363	0	8.624	53.738	0	59.607	196.766	7.354	74.22	45.29	0	7.374	99.556
QAP3	0	48.689	3.741	10.985	155.526	118.591	48.442	53.291	566.873	0.663	1.144	190.748	302.915	539.196	37.456	27.314	255.662	24.923	1.508	17.452	59.407	127.126	57.018	55.103	5.913	1.533	0.443	0	8.614	52.366	0	58.56	191.213	7.175	72.278	43.937	0	7.438	96.341
QAP5	0	48.222	4.531	11.178	157.616	120.771	47.851	60.61	568.59	0.433	1.196	194.332	305.584	547.41	38.019	27.766	260.518	25.285	1.543	16.894	60.712	129.954	57.022	56.164	5.917	1.471	0.092	0.136	8.653	53.129	0	60.424	194.59	7.335	73.613	44.836	0	7.26	97.651
QAP7	0	46.489	5.493	10.792	153.606	127.212	44.967	61.912	541.727	0	1.106	187.32	301.386	531.279	40.385	26.632	251.103	24.414	1.48	18.13	58.911	125.392	55.24	54.191	5.796	1.432	0	0.072	8.491	51.438	0	59.084	188.14	7.07	73.338	43.343	0	6.407	94.856
Amino Acid	PSER	TAU2	ASP2	HYP2	THR2	SER2	ASN2	GLU2	GLN2	SAR	AAD	PRO2	GLY2	ALA2	CIT2	ABU	VAL2	MET2	ALLISO	CYS2	ILE2	LEU2	TYR2	PHE2	BALA2	BABA	GBA	HCY	ETN	TRP2	HYL	ORN2	LYS2	1MHIS	HIS2	3MHIS	ANSP	CARSN	ARG2
NMP2	0	38.759	3.466	5.684	96.246	91.435	47.994	47.817	576.044	0	0.415	210.756	270.91	571.115	32.105	13.38	199.333	23.136	1.581	7.13	62.874	129.441	59.156	54.281	9.29	0.777	0	0	10.645	45.909	0	39.869	127.485	4.618	74.836	28.468	0	9.624	66.225
NMP3	0	37.385	3.929	5.575	93.917	88.912	45.467	51.482	557.267	0.963	0	206.432	266.994	556.015	31.341	13.133	194.341	22.7	1.513	4.68	61.442	126.56	57.645	53.832	8.927	0	0	0	10.519	45.21	0	39.188	125.249	4.486	73.412	27.728	0	8.81	67.972
NMP5	0	38.672	5.34	5.814	97.148	98.682	45.868	62.429	560.574	0	0	215.552	280.612	576.652	32.319	13.495	200.774	23.705	1.583	6.157	63.025	130.175	59.798	57.038	9.683	1.192	0	0	11.12	46.282	0	42.27	136.013	4.754	76.793	28.723	0	9.226	81.779
NMP7	0	38.561	7.999	5.806	100.668	117.268	47.586	69.507	559.381	0.571	0	229.19	297.232	585.85	32.48	13.49	204.379	26.172	1.632	6.017	68.143	138.662	61.942	62.541	9.023	0.583	0	0	12.712	47.244	0.536	44.781	164.908	4.813	82.403	29.286	0	7.963	135.57
NMD0	0	37.157	1.727	5.375	96.665	90.776	50.237	0	611.77	0	0	208.737	273.854	572.272	25.13	13.347	199.511	22.745	1.651	43.258	61.527	128.064	56.598	53.627	0	0.979	0.309	0	8.591	46.167	0	37.283	127.97	5.214	75.308	27.915	0	5.569	61.829
NMCB1	0	60.629	4.034	5.572	95.53	94.264	48.35	0	597.232	0	0.313	210.16	277.395	570.226	45.781	13.428	199.223	22.774	1.639	54.719	60.884	129.182	55.646	53.968	0	0.979	0.391	0.096	9.764	47.558	0	40.619	128.362	5.203	75.055	28.724	0	5.564	64.538
NMCB2	0	100.957	7.963	5.729	93.029	98.999	45.409	107.82	523.247	0	0	208.545	267.065	559.083	31.952	13.014	195.405	23.287	1.522	4.474	60.558	129.245	56.778	54.721	10.383	0.388	0.228	0	13.962	46.061	0	43.374	128.547	4.439	73.169	28.044	0	5.381	71.192
NMCB3	0	144.189	10.526	5.84	104.584	106.489	52.158	92.657	564.133	0.32	0	218.394	287.913	587.101	32.26	13.366	205.581	26.745	2.157	6.518	68.97	142.722	62.646	60.348	12.721	0	0	0.383	18.041	48.519	0.085	41.982	139.379	4.569	78.922	28.691	0	6.873	82.21
NMCB5	8.226	157.85	14.999	5.833	109.192	113.389	53.222	106.413	564.883	0	0.319	228.198	309.973	610.619	33.534	13.816	214.614	29.089	1.595	5.139	70.377	150.179	65.644	63.308	13.513	0	0	0.174	20.706	50.328	0	50.584	148.6	4.682	81.384	29.581	0	6.6	81.223
NMCB7	6.086	166.805	21.038	5.76	105.204	128.86	48.354	150.085	511.728	0	0	231.791	311.456	593.111	33.803	13.304	210.643	29.794	1.672	7.289	69.634	148.596	62.35	63.799	12.52	1.248	0	0	21.385	49.957	0	60.001	172.349	4.503	81.001	29.546	0	5.237	119.479
NMP1	0	38.2	2.381	5.491	96.622	91.282	49.983	28.879	609.671	0	0.389	210.855	282.223	574.367	32.52	13.483	200.905	23.001	1.676	53.553	62.333	129.868	57.248	54.44	9.295	1.008	0	0	9.434	46.392	0	38.665	129.439	5.276	75.489	28.256	0	7.018	62.238
QAP0	0	47.196	2.004	10.644	155.128	116.587	50.086	46.411	574.328	1.459	1.078	188.696	289.27	534.062	37.003	27.037	253.587	24.672	1.525	20.421	58.946	126.013	55.904	54.395	5.79	1.373	0	0	8.029	51.485	0	56.915	189.131	7.062	71.246	43.65	0	5.511	95.946
QACB1	0	78.153	3.84	10.396	149.667	113.784	47.787	54.957	549.399	0.955	1.097	183.537	283.276	517.286	35.828	26.128	245.129	23.957	1.435	14.301	57.056	123.42	53.626	52.751	6.071	1.366	0.466	0	9.08	50.201	0	56.095	182.445	6.827	68.834	42.344	0	5.874	92.811
QACB2	0	134.883	7.779	10.606	152.838	125.385	48.753	68.536	554.511	0.637	1.142	192.481	297.432	530.079	36.343	26.769	250.678	26.858	1.529	15.19	60.807	131.325	55.446	56.125	7.243	1.419	0.445	0.274	12.01	53.146	0.161	58.568	208.296	6.94	71.741	43.091	0	5.705	143.04
QACB3	0	156.084	11.326	10.199	149.05	123.214	48.157	77.797	524.599	0.143	1.076	184.413	287.438	510.085	34.449	24.928	240.886	26.931	1.435	15.265	59.488	129.832	55.389	55.675	7.481	1.269	0.371	0.077	14.694	50.585	0.083	55.842	192.051	6.539	69.2	40.867	0	5.328	118.46
QACB5	0	188.243	16.584	10.316	154.536	128.38	49.834	95.022	518.661	0.941	1.068	187.212	295.621	518.146	34.446	25.096	244.938	28.521	1.37	14.284	61.923	135.824	57.208	57.811	8.113	1.317	0	0.019	19.517	51.246	0.08	57.982	187.542	6.62	70.057	40.738	0	5.354	99.88
QACB7	0	222.432	24.03	11.59	174.968	149.326	54.963	117.578	555.467	1.122	1.242	211.945	335.586	583.4	38.424	27.933	275.273	32.716	1.55	20.101	71.621	155.971	64.043	66.742	9.3	1.494	0	0.444	23.212	58.141	0	69.745	214.752	7.338	79.727	46.004	0	4.721	113.945
QAP1	0	47.886	2.626	10.906	156.427	118.495	50.171	49.472	578.222	0.523	1.147	191.93	296.56	542.679	37.636	27.53	257.502	24.998	1.543	21.917	59.734	128.081	57.362	55.272	5.878	1.449	0.453	0.07	8.337	52.121	0.114	58.049	192.23	7.161	72.541	44.339	0	7.088	97.429
QAP2	0	49.095	3.163	11.235	159.902	121.174	50.557	51.986	588.316	0.643	1.212	195.908	304.152	553.972	38.458	28.094	262.908	25.555	1.557	18.172	61.142	130.818	57.958	56.578	6.099	1.424	0.363	0	8.624	53.738	0	59.607	196.766	7.354	74.22	45.29	0	7.374	99.556
QAP3	0	48.689	3.741	10.985	155.526	118.591	48.442	53.291	566.873	0.663	1.144	190.748	302.915	539.196	37.456	27.314	255.662	24.923	1.508	17.452	59.407	127.126	57.018	55.103	5.913	1.533	0.443	0	8.614	52.366	0	58.56	191.213	7.175	72.278	43.937	0	7.438	96.341
QAP5	0	48.222	4.531	11.178	157.616	120.771	47.851	60.61	568.59	0.433	1.196	194.332	305.584	547.41	38.019	27.766	260.518	25.285	1.543	16.894	60.712	129.954	57.022	56.164	5.917	1.471	0.092	0.136	8.653	53.129	0	60.424	194.59	7.335	73.613	44.836	0	7.26	97.651
QAP7	0	46.489	5.493	10.792	153.606	127.212	44.967	61.912	541.727	0	1.106	187.32	301.386	531.279	40.385	26.632	251.103	24.414	1.48	18.13	58.911	125.392	55.24	54.191	5.796	1.432	0	0.072	8.491	51.438	0	59.084	188.14	7.07	73.338	43.343	0	6.407	94.856
Amino Acid	PSER	TAU2	ASP2	HYP2	THR2	SER2	ASN2	GLU2	GLN2	SAR	AAD	PRO2	GLY2	ALA2	CIT2	ABU	VAL2	MET2	ALLISO	CYS2	ILE2	LEU2	TYR2	PHE2	BALA2	BABA	GBA	HCY	ETN	TRP2	HYL	ORN2	LYS2	1MHIS	HIS2	3MHIS	ANSP	CARSN	ARG2
NMP2	0	38.759	3.466	5.684	96.246	91.435	47.994	47.817	576.044	0	0.415	210.756	270.91	571.115	32.105	13.38	199.333	23.136	1.581	7.13	62.874	129.441	59.156	54.281	9.29	0.777	0	0	10.645	45.909	0	39.869	127.485	4.618	74.836	28.468	0	9.624	66.225
NMP3	0	37.385	3.929	5.575	93.917	88.912	45.467	51.482	557.267	0.963	0	206.432	266.994	556.015	31.341	13.133	194.341	22.7	1.513	4.68	61.442	126.56	57.645	53.832	8.927	0	0	0	10.519	45.21	0	39.188	125.249	4.486	73.412	27.728	0	8.81	67.972
NMP5	0	38.672	5.34	5.814	97.148	98.682	45.868	62.429	560.574	0	0	215.552	280.612	576.652	32.319	13.495	200.774	23.705	1.583	6.157	63.025	130.175	59.798	57.038	9.683	1.192	0	0	11.12	46.282	0	42.27	136.013	4.754	76.793	28.723	0	9.226	81.779
NMP7	0	38.561	7.999	5.806	100.668	117.268	47.586	69.507	559.381	0.571	0	229.19	297.232	585.85	32.48	13.49	204.379	26.172	1.632	6.017	68.143	138.662	61.942	62.541	9.023	0.583	0	0	12.712	47.244	0.536	44.781	164.908	4.813	82.403	29.286	0	7.963	135.57
NMD0	0	37.157	1.727	5.375	96.665	90.776	50.237	0	611.77	0	0	208.737	273.854	572.272	25.13	13.347	199.511	22.745	1.651	43.258	61.527	128.064	56.598	53.627	0	0.979	0.309	0	8.591	46.167	0	37.283	127.97	5.214	75.308	27.915	0	5.569	61.829
NMCB1	0	60.629	4.034	5.572	95.53	94.264	48.35	0	597.232	0	0.313	210.16	277.395	570.226	45.781	13.428	199.223	22.774	1.639	54.719	60.884	129.182	55.646	53.968	0	0.979	0.391	0.096	9.764	47.558	0	40.619	128.362	5.203	75.055	28.724	0	5.564	64.538
NMCB2	0	100.957	7.963	5.729	93.029	98.999	45.409	107.82	523.247	0	0	208.545	267.065	559.083	31.952	13.014	195.405	23.287	1.522	4.474	60.558	129.245	56.778	54.721	10.383	0.388	0.228	0	13.962	46.061	0	43.374	128.547	4.439	73.169	28.044	0	5.381	71.192
NMCB3	0	144.189	10.526	5.84	104.584	106.489	52.158	92.657	564.133	0.32	0	218.394	287.913	587.101	32.26	13.366	205.581	26.745	2.157	6.518	68.97	142.722	62.646	60.348	12.721	0	0	0.383	18.041	48.519	0.085	41.982	139.379	4.569	78.922	28.691	0	6.873	82.21
NMCB5	8.226	157.85	14.999	5.833	109.192	113.389	53.222	106.413	564.883	0	0.319	228.198	309.973	610.619	33.534	13.816	214.614	29.089	1.595	5.139	70.377	150.179	65.644	63.308	13.513	0	0	0.174	20.706	50.328	0	50.584	148.6	4.682	81.384	29.581	0	6.6	81.223
NMCB7	6.086	166.805	21.038	5.76	105.204	128.86	48.354	150.085	511.728	0	0	231.791	311.456	593.111	33.803	13.304	210.643	29.794	1.672	7.289	69.634	148.596	62.35	63.799	12.52	1.248	0	0	21.385	49.957	0	60.001	172.349	4.503	81.001	29.546	0	5.237	119.479
NMP1	0	38.2	2.381	5.491	96.622	91.282	49.983	28.879	609.671	0	0.389	210.855	282.223	574.367	32.52	13.483	200.905	23.001	1.676	53.553	62.333	129.868	57.248	54.44	9.295	1.008	0	0	9.434	46.392	0	38.665	129.439	5.276	75.489	28.256	0	7.018	62.238
QAP0	0	47.196	2.004	10.644	155.128	116.587	50.086	46.411	574.328	1.459	1.078	188.696	289.27	534.062	37.003	27.037	253.587	24.672	1.525	20.421	58.946	126.013	55.904	54.395	5.79	1.373	0	0	8.029	51.485	0	56.915	189.131	7.062	71.246	43.65	0	5.511	95.946
QACB1	0	78.153	3.84	10.396	149.667	113.784	47.787	54.957	549.399	0.955	1.097	183.537	283.276	517.286	35.828	26.128	245.129	23.957	1.435	14.301	57.056	123.42	53.626	52.751	6.071	1.366	0.466	0	9.08	50.201	0	56.095	182.445	6.827	68.834	42.344	0	5.874	92.811
QACB2	0	134.883	7.779	10.606	152.838	125.385	48.753	68.536	554.511	0.637	1.142	192.481	297.432	530.079	36.343	26.769	250.678	26.858	1.529	15.19	60.807	131.325	55.446	56.125	7.243	1.419	0.445	0.274	12.01	53.146	0.161	58.568	208.296	6.94	71.741	43.091	0	5.705	143.04
QACB3	0	156.084	11.326	10.199	149.05	123.214	48.157	77.797	524.599	0.143	1.076	184.413	287.438	510.085	34.449	24.928	240.886	26.931	1.435	15.265	59.488	129.832	55.389	55.675	7.481	1.269	0.371	0.077	14.694	50.585	0.083	55.842	192.051	6.539	69.2	40.867	0	5.328	118.46
QACB5	0	188.243	16.584	10.316	154.536	128.38	49.834	95.022	518.661	0.941	1.068	187.212	295.621	518.146	34.446	25.096	244.938	28.521	1.37	14.284	61.923	135.824	57.208	57.811	8.113	1.317	0	0.019	19.517	51.246	0.08	57.982	187.542	6.62	70.057	40.738	0	5.354	99.88
QACB7	0	222.432	24.03	11.59	174.968	149.326	54.963	117.578	555.467	1.122	1.242	211.945	335.586	583.4	38.424	27.933	275.273	32.716	1.55	20.101	71.621	155.971	64.043	66.742	9.3	1.494	0	0.444	23.212	58.141	0	69.745	214.752	7.338	79.727	46.004	0	4.721	113.945
QAP1	0	47.886	2.626	10.906	156.427	118.495	50.171	49.472	578.222	0.523	1.147	191.93	296.56	542.679	37.636	27.53	257.502	24.998	1.543	21.917	59.734	128.081	57.362	55.272	5.878	1.449	0.453	0.07	8.337	52.121	0.114	58.049	192.23	7.161	72.541	44.339	0	7.088	97.429
QAP2	0	49.095	3.163	11.235	159.902	121.174	50.557	51.986	588.316	0.643	1.212	195.908	304.152	553.972	38.458	28.094	262.908	25.555	1.557	18.172	61.142	130.818	57.958	56.578	6.099	1.424	0.363	0	8.624	53.738	0	59.607	196.766	7.354	74.22	45.29	0	7.374	99.556
QAP3	0	48.689	3.741	10.985	155.526	118.591	48.442	53.291	566.873	0.663	1.144	190.748	302.915	539.196	37.456	27.314	255.662	24.923	1.508	17.452	59.407	127.126	57.018	55.103	5.913	1.533	0.443	0	8.614	52.366	0	58.56	191.213	7.175	72.278	43.937	0	7.438	96.341
QAP5	0	48.222	4.531	11.178	157.616	120.771	47.851	60.61	568.59	0.433	1.196	194.332	305.584	547.41	38.019	27.766	260.518	25.285	1.543	16.894	60.712	129.954	57.022	56.164	5.917	1.471	0.092	0.136	8.653	53.129	0	60.424	194.59	7.335	73.613	44.836	0	7.26	97.651
QAP7	0	46.489	5.493	10.792	153.606	127.212	44.967	61.912	541.727	0	1.106	187.32	301.386	531.279	40.385	26.632	251.103	24.414	1.48	18.13	58.911	125.392	55.24	54.191	5.796	1.432	0	0.072	8.491	51.438	0	59.084	188.14	7.07	73.338	43.343	0	6.407	94.856
Amino Acid	PSER	TAU2	ASP2	HYP2	THR2	SER2	ASN2	GLU2	GLN2	SAR	AAD	PRO2	GLY2	ALA2	CIT2	ABU	VAL2	MET2	ALLISO	CYS2	ILE2	LEU2	TYR2	PHE2	BALA2	BABA	GBA	HCY	ETN	TRP2	HYL	ORN2	LYS2	1MHIS	HIS2	3MHIS	ANSP	CARSN	ARG2
NMP2	0	38.759	3.466	5.684	96.246	91.435	47.994	47.817	576.044	0	0.415	210.756	270.91	571.115	32.105	13.38	199.333	23.136	1.581	7.13	62.874	129.441	59.156	54.281	9.29	0.777	0	0	10.645	45.909	0	39.869	127.485	4.618	74.836	28.468	0	9.624	66.225
NMP3	0	37.385	3.929	5.575	93.917	88.912	45.467	51.482	557.267	0.963	0	206.432	266.994	556.015	31.341	13.133	194.341	22.7	1.513	4.68	61.442	126.56	57.645	53.832	8.927	0	0	0	10.519	45.21	0	39.188	125.249	4.486	73.412	27.728	0	8.81	67.972
NMP5	0	38.672	5.34	5.814	97.148	98.682	45.868	62.429	560.574	0	0	215.552	280.612	576.652	32.319	13.495	200.774	23.705	1.583	6.157	63.025	130.175	59.798	57.038	9.683	1.192	0	0	11.12	46.282	0	42.27	136.013	4.754	76.793	28.723	0	9.226	81.779
NMP7	0	38.561	7.999	5.806	100.668	117.268	47.586	69.507	559.381	0.571	0	229.19	297.232	585.85	32.48	13.49	204.379	26.172	1.632	6.017	68.143	138.662	61.942	62.541	9.023	0.583	0	0	12.712	47.244	0.536	44.781	164.908	4.813	82.403	29.286	0	7.963	135.57
NMD0	0	37.157	1.727	5.375	96.665	90.776	50.237	0	611.77	0	0	208.737	273.854	572.272	25.13	13.347	199.511	22.745	1.651	43.258	61.527	128.064	56.598	53.627	0	0.979	0.309	0	8.591	46.167	0	37.283	127.97	5.214	75.308	27.915	0	5.569	61.829
NMCB1	0	60.629	4.034	5.572	95.53	94.264	48.35	0	597.232	0	0.313	210.16	277.395	570.226	45.781	13.428	199.223	22.774	1.639	54.719	60.884	129.182	55.646	53.968	0	0.979	0.391	0.096	9.764	47.558	0	40.619	128.362	5.203	75.055	28.724	0	5.564	64.538
NMCB2	0	100.957	7.963	5.729	93.029	98.999	45.409	107.82	523.247	0	0	208.545	267.065	559.083	31.952	13.014	195.405	23.287	1.522	4.474	60.558	129.245	56.778	54.721	10.383	0.388	0.228	0	13.962	46.061	0	43.374	128.547	4.439	73.169	28.044	0	5.381	71.192
NMCB3	0	144.189	10.526	5.84	104.584	106.489	52.158	92.657	564.133	0.32	0	218.394	287.913	587.101	32.26	13.366	205.581	26.745	2.157	6.518	68.97	142.722	62.646	60.348	12.721	0	0	0.383	18.041	48.519	0.085	41.982	139.379	4.569	78.922	28.691	0	6.873	82.21
NMCB5	8.226	157.85	14.999	5.833	109.192	113.389	53.222	106.413	564.883	0	0.319	228.198	309.973	610.619	33.534	13.816	214.614	29.089	1.595	5.139	70.377	150.179	65.644	63.308	13.513	0	0	0.174	20.706	50.328	0	50.584	148.6	4.682	81.384	29.581	0	6.6	81.223
NMCB7	6.086	166.805	21.038	5.76	105.204	128.86	48.354	150.085	511.728	0	0	231.791	311.456	593.111	33.803	13.304	210.643	29.794	1.672	7.289	69.634	148.596	62.35	63.799	12.52	1.248	0	0	21.385	49.957	0	60.001	172.349	4.503	81.001	29.546	0	5.237	119.479
NMP1	0	38.2	2.381	5.491	96.622	91.282	49.983	28.879	609.671	0	0.389	210.855	282.223	574.367	32.52	13.483	200.905	23.001	1.676	53.553	62.333	129.868	57.248	54.44	9.295	1.008	0	0	9.434	46.392	0	38.665	129.439	5.276	75.489	28.256	0	7.018	62.238
QAP0	0	47.196	2.004	10.644	155.128	116.587	50.086	46.411	574.328	1.459	1.078	188.696	289.27	534.062	37.003	27.037	253.587	24.672	1.525	20.421	58.946	126.013	55.904	54.395	5.79	1.373	0	0	8.029	51.485	0	56.915	189.131	7.062	71.246	43.65	0	5.511	95.946
QACB1	0	78.153	3.84	10.396	149.667	113.784	47.787	54.957	549.399	0.955	1.097	183.537	283.276	517.286	35.828	26.128	245.129	23.957	1.435	14.301	57.056	123.42	53.626	52.751	6.071	1.366	0.466	0	9.08	50.201	0	56.095	182.445	6.827	68.834	42.344	0	5.874	92.811
QACB2	0	134.883	7.779	10.606	152.838	125.385	48.753	68.536	554.511	0.637	1.142	192.481	297.432	530.079	36.343	26.769	250.678	26.858	1.529	15.19	60.807	131.325	55.446	56.125	7.243	1.419	0.445	0.274	12.01	53.146	0.161	58.568	208.296	6.94	71.741	43.091	0	5.705	143.04
QACB3	0	156.084	11.326	10.199	149.05	123.214	48.157	77.797	524.599	0.143	1.076	184.413	287.438	510.085	34.449	24.928	240.886	26.931	1.435	15.265	59.488	129.832	55.389	55.675	7.481	1.269	0.371	0.077	14.694	50.585	0.083	55.842	192.051	6.539	69.2	40.867	0	5.328	118.46
QACB5	0	188.243	16.584	10.316	154.536	128.38	49.834	95.022	518.661	0.941	1.068	187.212	295.621	518.146	34.446	25.096	244.938	28.521	1.37	14.284	61.923	135.824	57.208	57.811	8.113	1.317	0	0.019	19.517	51.246	0.08	57.982	187.542	6.62	70.057	40.738	0	5.354	99.88
QACB7	0	222.432	24.03	11.59	174.968	149.326	54.963	117.578	555.467	1.122	1.242	211.945	335.586	583.4	38.424	27.933	275.273	32.716	1.55	20.101	71.621	155.971	64.043	66.742	9.3	1.494	0	0.444	23.212	58.141	0	69.745	214.752	7.338	79.727	46.004	0	4.721	113.945
QAP1	0	47.886	2.626	10.906	156.427	118.495	50.171	49.472	578.222	0.523	1.147	191.93	296.56	542.679	37.636	27.53	257.502	24.998	1.543	21.917	59.734	128.081	57.362	55.272	5.878	1.449	0.453	0.07	8.337	52.121	0.114	58.049	192.23	7.161	72.541	44.339	0	7.088	97.429
QAP2	0	49.095	3.163	11.235	159.902	121.174	50.557	51.986	588.316	0.643	1.212	195.908	304.152	553.972	38.458	28.094	262.908	25.555	1.557	18.172	61.142	130.818	57.958	56.578	6.099	1.424	0.363	0	8.624	53.738	0	59.607	196.766	7.354	74.22	45.29	0	7.374	99.556
QAP3	0	48.689	3.741	10.985	155.526	118.591	48.442	53.291	566.873	0.663	1.144	190.748	302.915	539.196	37.456	27.314	255.662	24.923	1.508	17.452	59.407	127.126	57.018	55.103	5.913	1.533	0.443	0	8.614	52.366	0	58.56	191.213	7.175	72.278	43.937	0	7.438	96.341
QAP5	0	48.222	4.531	11.178	157.616	120.771	47.851	60.61	568.59	0.433	1.196	194.332	305.584	547.41	38.019	27.766	260.518	25.285	1.543	16.894	60.712	129.954	57.022	56.164	5.917	1.471	0.092	0.136	8.653	53.129	0	60.424	194.59	7.335	73.613	44.836	0	7.26	97.651
QAP7	0	46.489	5.493	10.792	153.606	127.212	44.967	61.912	541.727	0	1.106	187.32	301.386	531.279	40.385	26.632	251.103	24.414	1.48	18.13	58.911	125.392	55.24	54.191	5.796	1.432	0	0.072	8.491	51.438	0	59.084	188.14	7.07	73.338	43.343	0	6.407	94.856
Amino Acid	PSER	TAU2	ASP2	HYP2	THR2	SER2	ASN2	GLU2	GLN2	SAR	AAD	PRO2	GLY2	ALA2	CIT2	ABU	VAL2	MET2	ALLISO	CYS2	ILE2	LEU2	TYR2	PHE2	BALA2	BABA	GBA	HCY	ETN	TRP2	HYL	ORN2	LYS2	1MHIS	HIS2	3MHIS	ANSP	CARSN	ARG2
NMP2	0	38.759	3.466	5.684	96.246	91.435	47.994	47.817	576.044	0	0.415	210.756	270.91	571.115	32.105	13.38	199.333	23.136	1.581	7.13	62.874	129.441	59.156	54.281	9.29	0.777	0	0	10.645	45.909	0	39.869	127.485	4.618	74.836	28.468	0	9.624	66.225
NMP3	0	37.385	3.929	5.575	93.917	88.912	45.467	51.482	557.267	0.963	0	206.432	266.994	556.015	31.341	13.133	194.341	22.7	1.513	4.68	61.442	126.56	57.645	53.832	8.927	0	0	0	10.519	45.21	0	39.188	125.249	4.486	73.412	27.728	0	8.81	67.972
NMP5	0	38.672	5.34	5.814	97.148	98.682	45.868	62.429	560.574	0	0	215.552	280.612	576.652	32.319	13.495	200.774	23.705	1.583	6.157	63.025	130.175	59.798	57.038	9.683	1.192	0	0	11.12	46.282	0	42.27	136.013	4.754	76.793	28.723	0	9.226	81.779
NMP7	0	38.561	7.999	5.806	100.668	117.268	47.586	69.507	559.381	0.571	0	229.19	297.232	585.85	32.48	13.49	204.379	26.172	1.632	6.017	68.143	138.662	61.942	62.541	9.023	0.583	0	0	12.712	47.244	0.536	44.781	164.908	4.813	82.403	29.286	0	7.963	135.57
NMD0	0	37.157	1.727	5.375	96.665	90.776	50.237	0	611.77	0	0	208.737	273.854	572.272	25.13	13.347	199.511	22.745	1.651	43.258	61.527	128.064	56.598	53.627	0	0.979	0.309	0	8.591	46.167	0	37.283	127.97	5.214	75.308	27.915	0	5.569	61.829
NMCB1	0	60.629	4.034	5.572	95.53	94.264	48.35	0	597.232	0	0.313	210.16	277.395	570.226	45.781	13.428	199.223	22.774	1.639	54.719	60.884	129.182	55.646	53.968	0	0.979	0.391	0.096	9.764	47.558	0	40.619	128.362	5.203	75.055	28.724	0	5.564	64.538
NMCB2	0	100.957	7.963	5.729	93.029	98.999	45.409	107.82	523.247	0	0	208.545	267.065	559.083	31.952	13.014	195.405	23.287	1.522	4.474	60.558	129.245	56.778	54.721	10.383	0.388	0.228	0	13.962	46.061	0	43.374	128.547	4.439	73.169	28.044	0	5.381	71.192
NMCB3	0	144.189	10.526	5.84	104.584	106.489	52.158	92.657	564.133	0.32	0	218.394	287.913	587.101	32.26	13.366	205.581	26.745	2.157	6.518	68.97	142.722	62.646	60.348	12.721	0	0	0.383	18.041	48.519	0.085	41.982	139.379	4.569	78.922	28.691	0	6.873	82.21
NMCB5	8.226	157.85	14.999	5.833	109.192	113.389	53.222	106.413	564.883	0	0.319	228.198	309.973	610.619	33.534	13.816	214.614	29.089	1.595	5.139	70.377	150.179	65.644	63.308	13.513	0	0	0.174	20.706	50.328	0	50.584	148.6	4.682	81.384	29.581	0	6.6	81.223
NMCB7	6.086	166.805	21.038	5.76	105.204	128.86	48.354	150.085	511.728	0	0	231.791	311.456	593.111	33.803	13.304	210.643	29.794	1.672	7.289	69.634	148.596	62.35	63.799	12.52	1.248	0	0	21.385	49.957	0	60.001	172.349	4.503	81.001	29.546	0	5.237	119.479
NMP1	0	38.2	2.381	5.491	96.622	91.282	49.983	28.879	609.671	0	0.389	210.855	282.223	574.367	32.52	13.483	200.905	23.001	1.676	53.553	62.333	129.868	57.248	54.44	9.295	1.008	0	0	9.434	46.392	0	38.665	129.439	5.276	75.489	28.256	0	7.018	62.238
QAP0	0	47.196	2.004	10.644	155.128	116.587	50.086	46.411	574.328	1.459	1.078	188.696	289.27	534.062	37.003	27.037	253.587	24.672	1.525	20.421	58.946	126.013	55.904	54.395	5.79	1.373	0	0	8.029	51.485	0	56.915	189.131	7.062	71.246	43.65	0	5.511	95.946
QACB1	0	78.153	3.84	10.396	149.667	113.784	47.787	54.957	549.399	0.955	1.097	183.537	283.276	517.286	35.828	26.128	245.129	23.957	1.435	14.301	57.056	123.42	53.626	52.751	6.071	1.366	0.466	0	9.08	50.201	0	56.095	182.445	6.827	68.834	42.344	0	5.874	92.811
QACB2	0	134.883	7.779	10.606	152.838	125.385	48.753	68.536	554.511	0.637	1.142	192.481	297.432	530.079	36.343	26.769	250.678	26.858	1.529	15.19	60.807	131.325	55.446	56.125	7.243	1.419	0.445	0.274	12.01	53.146	0.161	58.568	208.296	6.94	71.741	43.091	0	5.705	143.04
QACB3	0	156.084	11.326	10.199	149.05	123.214	48.157	77.797	524.599	0.143	1.076	184.413	287.438	510.085	34.449	24.928	240.886	26.931	1.435	15.265	59.488	129.832	55.389	55.675	7.481	1.269	0.371	0.077	14.694	50.585	0.083	55.842	192.051	6.539	69.2	40.867	0	5.328	118.46
QACB5	0	188.243	16.584	10.316	154.536	128.38	49.834	95.022	518.661	0.941	1.068	187.212	295.621	518.146	34.446	25.096	244.938	28.521	1.37	14.284	61.923	135.824	57.208	57.811	8.113	1.317	0	0.019	19.517	51.246	0.08	57.982	187.542	6.62	70.057	40.738	0	5.354	99.88
QACB7	0	222.432	24.03	11.59	174.968	149.326	54.963	117.578	555.467	1.122	1.242	211.945	335.586	583.4	38.424	27.933	275.273	32.716	1.55	20.101	71.621	155.971	64.043	66.742	9.3	1.494	0	0.444	23.212	58.141	0	69.745	214.752	7.338	79.727	46.004	0	4.721	113.945
QAP1	0	47.886	2.626	10.906	156.427	118.495	50.171	49.472	578.222	0.523	1.147	191.93	296.56	542.679	37.636	27.53	257.502	24.998	1.543	21.917	59.734	128.081	57.362	55.272	5.878	1.449	0.453	0.07	8.337	52.121	0.114	58.049	192.23	7.161	72.541	44.339	0	7.088	97.429
QAP2	0	49.095	3.163	11.235	159.902	121.174	50.557	51.986	588.316	0.643	1.212	195.908	304.152	553.972	38.458	28.094	262.908	25.555	1.557	18.172	61.142	130.818	57.958	56.578	6.099	1.424	0.363	0	8.624	53.738	0	59.607	196.766	7.354	74.22	45.29	0	7.374	99.556
QAP3	0	48.689	3.741	10.985	155.526	118.591	48.442	53.291	566.873	0.663	1.144	190.748	302.915	539.196	37.456	27.314	255.662	24.923	1.508	17.452	59.407	127.126	57.018	55.103	5.913	1.533	0.443	0	8.614	52.366	0	58.56	191.213	7.175	72.278	43.937	0	7.438	96.341
QAP5	0	48.222	4.531	11.178	157.616	120.771	47.851	60.61	568.59	0.433	1.196	194.332	305.584	547.41	38.019	27.766	260.518	25.285	1.543	16.894	60.712	129.954	57.022	56.164	5.917	1.471	0.092	0.136	8.653	53.129	0	60.424	194.59	7.335	73.613	44.836	0	7.26	97.651
QAP7	0	46.489	5.493	10.792	153.606	127.212	44.967	61.912	541.727	0	1.106	187.32	301.386	531.279	40.385	26.632	251.103	24.414	1.48	18.13	58.911	125.392	55.24	54.191	5.796	1.432	0	0.072	8.491	51.438	0	59.084	188.14	7.07	73.338	43.343	0	6.407	94.856
Amino Acid	PSER	TAU2	ASP2	HYP2	THR2	SER2	ASN2	GLU2	GLN2	SAR	AAD	PRO2	GLY2	ALA2	CIT2	ABU	VAL2	MET2	ALLISO	CYS2	ILE2	LEU2	TYR2	PHE2	BALA2	BABA	GBA	HCY	ETN	TRP2	HYL	ORN2	LYS2	1MHIS	HIS2	3MHIS	ANSP	CARSN	ARG2
NMP2	0	38.759	3.466	5.684	96.246	91.435	47.994	47.817	576.044	0	0.415	210.756	270.91	571.115	32.105	13.38	199.333	23.136	1.581	7.13	62.874	129.441	59.156	54.281	9.29	0.777	0	0	10.645	45.909	0	39.869	127.485	4.618	74.836	28.468	0	9.624	66.225
NMP3	0	37.385	3.929	5.575	93.917	88.912	45.467	51.482	557.267	0.963	0	206.432	266.994	556.015	31.341	13.133	194.341	22.7	1.513	4.68	61.442	126.56	57.645	53.832	8.927	0	0	0	10.519	45.21	0	39.188	125.249	4.486	73.412	27.728	0	8.81	67.972
NMP5	0	38.672	5.34	5.814	97.148	98.682	45.868	62.429	560.574	0	0	215.552	280.612	576.652	32.319	13.495	200.774	23.705	1.583	6.157	63.025	130.175	59.798	57.038	9.683	1.192	0	0	11.12	46.282	0	42.27	136.013	4.754	76.793	28.723	0	9.226	81.779
NMP7	0	38.561	7.999	5.806	100.668	117.268	47.586	69.507	559.381	0.571	0	229.19	297.232	585.85	32.48	13.49	204.379	26.172	1.632	6.017	68.143	138.662	61.942	62.541	9.023	0.583	0	0	12.712	47.244	0.536	44.781	164.908	4.813	82.403	29.286	0	7.963	135.57
NMD0	0	37.157	1.727	5.375	96.665	90.776	50.237	0	611.77	0	0	208.737	273.854	572.272	25.13	13.347	199.511	22.745	1.651	43.258	61.527	128.064	56.598	53.627	0	0.979	0.309	0	8.591	46.167	0	37.283	127.97	5.214	75.308	27.915	0	5.569	61.829
NMCB1	0	60.629	4.034	5.572	95.53	94.264	48.35	0	597.232	0	0.313	210.16	277.395	570.226	45.781	13.428	199.223	22.774	1.639	54.719	60.884	129.182	55.646	53.968	0	0.979	0.391	0.096	9.764	47.558	0	40.619	128.362	5.203	75.055	28.724	0	5.564	64.538
NMCB2	0	100.957	7.963	5.729	93.029	98.999	45.409	107.82	523.247	0	0	208.545	267.065	559.083	31.952	13.014	195.405	23.287	1.522	4.474	60.558	129.245	56.778	54.721	10.383	0.388	0.228	0	13.962	46.061	0	43.374	128.547	4.439	73.169	28.044	0	5.381	71.192
NMCB3	0	144.189	10.526	5.84	104.584	106.489	52.158	92.657	564.133	0.32	0	218.394	287.913	587.101	32.26	13.366	205.581	26.745	2.157	6.518	68.97	142.722	62.646	60.348	12.721	0	0	0.383	18.041	48.519	0.085	41.982	139.379	4.569	78.922	28.691	0	6.873	82.21
NMCB5	8.226	157.85	14.999	5.833	109.192	113.389	53.222	106.413	564.883	0	0.319	228.198	309.973	610.619	33.534	13.816	214.614	29.089	1.595	5.139	70.377	150.179	65.644	63.308	13.513	0	0	0.174	20.706	50.328	0	50.584	148.6	4.682	81.384	29.581	0	6.6	81.223
NMCB7	6.086	166.805	21.038	5.76	105.204	128.86	48.354	150.085	511.728	0	0	231.791	311.456	593.111	33.803	13.304	210.643	29.794	1.672	7.289	69.634	148.596	62.35	63.799	12.52	1.248	0	0	21.385	49.957	0	60.001	172.349	4.503	81.001	29.546	0	5.237	119.479
NMP1	0	38.2	2.381	5.491	96.622	91.282	49.983	28.879	609.671	0	0.389	210.855	282.223	574.367	32.52	13.483	200.905	23.001	1.676	53.553	62.333	129.868	57.248	54.44	9.295	1.008	0	0	9.434	46.392	0	38.665	129.439	5.276	75.489	28.256	0	7.018	62.238
QAP0	0	47.196	2.004	10.644	155.128	116.587	50.086	46.411	574.328	1.459	1.078	188.696	289.27	534.062	37.003	27.037	253.587	24.672	1.525	20.421	58.946	126.013	55.904	54.395	5.79	1.373	0	0	8.029	51.485	0	56.915	189.131	7.062	71.246	43.65	0	5.511	95.946
QACB1	0	78.153	3.84	10.396	149.667	113.784	47.787	54.957	549.399	0.955	1.097	183.537	283.276	517.286	35.828	26.128	245.129	23.957	1.435	14.301	57.056	123.42	53.626	52.751	6.071	1.366	0.466	0	9.08	50.201	0	56.095	182.445	6.827	68.834	42.344	0	5.874	92.811
QACB2	0	134.883	7.779	10.606	152.838	125.385	48.753	68.536	554.511	0.637	1.142	192.481	297.432	530.079	36.343	26.769	250.678	26.858	1.529	15.19	60.807	131.325	55.446	56.125	7.243	1.419	0.445	0.274	12.01	53.146	0.161	58.568	208.296	6.94	71.741	43.091	0	5.705	143.04
QACB3	0	156.084	11.326	10.199	149.05	123.214	48.157	77.797	524.599	0.143	1.076	184.413	287.438	510.085	34.449	24.928	240.886	26.931	1.435	15.265	59.488	129.832	55.389	55.675	7.481	1.269	0.371	0.077	14.694	50.585	0.083	55.842	192.051	6.539	69.2	40.867	0	5.328	118.46
QACB5	0	188.243	16.584	10.316	154.536	128.38	49.834	95.022	518.661	0.941	1.068	187.212	295.621	518.146	34.446	25.096	244.938	28.521	1.37	14.284	61.923	135.824	57.208	57.811	8.113	1.317	0	0.019	19.517	51.246	0.08	57.982	187.542	6.62	70.057	40.738	0	5.354	99.88
QACB7	0	222.432	24.03	11.59	174.968	149.326	54.963	117.578	555.467	1.122	1.242	211.945	335.586	583.4	38.424	27.933	275.273	32.716	1.55	20.101	71.621	155.971	64.043	66.742	9.3	1.494	0	0.444	23.212	58.141	0	69.745	214.752	7.338	79.727	46.004	0	4.721	113.945
QAP1	0	47.886	2.626	10.906	156.427	118.495	50.171	49.472	578.222	0.523	1.147	191.93	296.56	542.679	37.636	27.53	257.502	24.998	1.543	21.917	59.734	128.081	57.362	55.272	5.878	1.449	0.453	0.07	8.337	52.121	0.114	58.049	192.23	7.161	72.541	44.339	0	7.088	97.429
QAP2	0	49.095	3.163	11.235	159.902	121.174	50.557	51.986	588.316	0.643	1.212	195.908	304.152	553.972	38.458	28.094	262.908	25.555	1.557	18.172	61.142	130.818	57.958	56.578	6.099	1.424	0.363	0	8.624	53.738	0	59.607	196.766	7.354	74.22	45.29	0	7.374	99.556
QAP3	0	48.689	3.741	10.985	155.526	118.591	48.442	53.291	566.873	0.663	1.144	190.748	302.915	539.196	37.456	27.314	255.662	24.923	1.508	17.452	59.407	127.126	57.018	55.103	5.913	1.533	0.443	0	8.614	52.366	0	58.56	191.213	7.175	72.278	43.937	0	7.438	96.341
QAP5	0	48.222	4.531	11.178	157.616	120.771	47.851	60.61	568.59	0.433	1.196	194.332	305.584	547.41	38.019	27.766	260.518	25.285	1.543	16.894	60.712	129.954	57.022	56.164	5.917	1.471	0.092	0.136	8.653	53.129	0	60.424	194.59	7.335	73.613	44.836	0	7.26	97.651
QAP7	0	46.489	5.493	10.792	153.606	127.212	44.967	61.912	541.727	0	1.106	187.32	301.386	531.279	40.385	26.632	251.103	24.414	1.48	18.13	58.911	125.392	55.24	54.191	5.796	1.432	0	0.072	8.491	51.438	0	59.084	188.14	7.07	73.338	43.343	0	6.407	94.856
Amino Acid	PSER	TAU2	ASP2	HYP2	THR2	SER2	ASN2	GLU2	GLN2	SAR	AAD	PRO2	GLY2	ALA2	CIT2	ABU	VAL2	MET2	ALLISO	CYS2	ILE2	LEU2	TYR2	PHE2	BALA2	BABA	GBA	HCY	ETN	TRP2	HYL	ORN2	LYS2	1MHIS	HIS2	3MHIS	ANSP	CARSN	ARG2
NMP2	0	38.759	3.466	5.684	96.246	91.435	47.994	47.817	576.044	0	0.415	210.756	270.91	571.115	32.105	13.38	199.333	23.136	1.581	7.13	62.874	129.441	59.156	54.281	9.29	0.777	0	0	10.645	45.909	0	39.869	127.485	4.618	74.836	28.468	0	9.624	66.225
NMP3	0	37.385	3.929	5.575	93.917	88.912	45.467	51.482	557.267	0.963	0	206.432	266.994	556.015	31.341	13.133	194.341	22.7	1.513	4.68	61.442	126.56	57.645	53.832	8.927	0	0	0	10.519	45.21	0	39.188	125.249	4.486	73.412	27.728	0	8.81	67.972
NMP5	0	38.672	5.34	5.814	97.148	98.682	45.868	62.429	560.574	0	0	215.552	280.612	576.652	32.319	13.495	200.774	23.705	1.583	6.157	63.025	130.175	59.798	57.038	9.683	1.192	0	0	11.12	46.282	0	42.27	136.013	4.754	76.793	28.723	0	9.226	81.779
NMP7	0	38.561	7.999	5.806	100.668	117.268	47.586	69.507	559.381	0.571	0	229.19	297.232	585.85	32.48	13.49	204.379	26.172	1.632	6.017	68.143	138.662	61.942	62.541	9.023	0.583	0	0	12.712	47.244	0.536	44.781	164.908	4.813	82.403	29.286	0	7.963	135.57
NMD0	0	37.157	1.727	5.375	96.665	90.776	50.237	0	611.77	0	0	208.737	273.854	572.272	25.13	13.347	199.511	22.745	1.651	43.258	61.527	128.064	56.598	53.627	0	0.979	0.309	0	8.591	46.167	0	37.283	127.97	5.214	75.308	27.915	0	5.569	61.829
NMCB1	0	60.629	4.034	5.572	95.53	94.264	48.35	0	597.232	0	0.313	210.16	277.395	570.226	45.781	13.428	199.223	22.774	1.639	54.719	60.884	129.182	55.646	53.968	0	0.979	0.391	0.096	9.764	47.558	0	40.619	128.362	5.203	75.055	28.724	0	5.564	64.538
NMCB2	0	100.957	7.963	5.729	93.029	98.999	45.409	107.82	523.247	0	0	208.545	267.065	559.083	31.952	13.014	195.405	23.287	1.522	4.474	60.558	129.245	56.778	54.721	10.383	0.388	0.228	0	13.962	46.061	0	43.374	128.547	4.439	73.169	28.044	0	5.381	71.192
NMCB3	0	144.189	10.526	5.84	104.584	106.489	52.158	92.657	564.133	0.32	0	218.394	287.913	587.101	32.26	13.366	205.581	26.745	2.157	6.518	68.97	142.722	62.646	60.348	12.721	0	0	0.383	18.041	48.519	0.085	41.982	139.379	4.569	78.922	28.691	0	6.873	82.21
NMCB5	8.226	157.85	14.999	5.833	109.192	113.389	53.222	106.413	564.883	0	0.319	228.198	309.973	610.619	33.534	13.816	214.614	29.089	1.595	5.139	70.377	150.179	65.644	63.308	13.513	0	0	0.174	20.706	50.328	0	50.584	148.6	4.682	81.384	29.581	0	6.6	81.223
NMCB7	6.086	166.805	21.038	5.76	105.204	128.86	48.354	150.085	511.728	0	0	231.791	311.456	593.111	33.803	13.304	210.643	29.794	1.672	7.289	69.634	148.596	62.35	63.799	12.52	1.248	0	0	21.385	49.957	0	60.001	172.349	4.503	81.001	29.546	0	5.237	119.479
NMP1	0	38.2	2.381	5.491	96.622	91.282	49.983	28.879	609.671	0	0.389	210.855	282.223	574.367	32.52	13.483	200.905	23.001	1.676	53.553	62.333	129.868	57.248	54.44	9.295	1.008	0	0	9.434	46.392	0	38.665	129.439	5.276	75.489	28.256	0	7.018	62.238
QAP0	0	47.196	2.004	10.644	155.128	116.587	50.086	46.411	574.328	1.459	1.078	188.696	289.27	534.062	37.003	27.037	253.587	24.672	1.525	20.421	58.946	126.013	55.904	54.395	5.79	1.373	0	0	8.029	51.485	0	56.915	189.131	7.062	71.246	43.65	0	5.511	95.946
QACB1	0	78.153	3.84	10.396	149.667	113.784	47.787	54.957	549.399	0.955	1.097	183.537	283.276	517.286	35.828	26.128	245.129	23.957	1.435	14.301	57.056	123.42	53.626	52.751	6.071	1.366	0.466	0	9.08	50.201	0	56.095	182.445	6.827	68.834	42.344	0	5.874	92.811
QACB2	0	134.883	7.779	10.606	152.838	125.385	48.753	68.536	554.511	0.637	1.142	192.481	297.432	530.079	36.343	26.769	250.678	26.858	1.529	15.19	60.807	131.325	55.446	56.125	7.243	1.419	0.445	0.274	12.01	53.146	0.161	58.568	208.296	6.94	71.741	43.091	0	5.705	143.04
QACB3	0	156.084	11.326	10.199	149.05	123.214	48.157	77.797	524.599	0.143	1.076	184.413	287.438	510.085	34.449	24.928	240.886	26.931	1.435	15.265	59.488	129.832	55.389	55.675	7.481	1.269	0.371	0.077	14.694	50.585	0.083	55.842	192.051	6.539	69.2	40.867	0	5.328	118.46
QACB5	0	188.243	16.584	10.316	154.536	128.38	49.834	95.022	518.661	0.941	1.068	187.212	295.621	518.146	34.446	25.096	244.938	28.521	1.37	14.284	61.923	135.824	57.208	57.811	8.113	1.317	0	0.019	19.517	51.246	0.08	57.982	187.542	6.62	70.057	40.738	0	5.354	99.88
QACB7	0	222.432	24.03	11.59	174.968	149.326	54.963	117.578	555.467	1.122	1.242	211.945	335.586	583.4	38.424	27.933	275.273	32.716	1.55	20.101	71.621	155.971	64.043	66.742	9.3	1.494	0	0.444	23.212	58.141	0	69.745	214.752	7.338	79.727	46.004	0	4.721	113.945
QAP1	0	47.886	2.626	10.906	156.427	118.495	50.171	49.472	578.222	0.523	1.147	191.93	296.56	542.679	37.636	27.53	257.502	24.998	1.543	21.917	59.734	128.081	57.362	55.272	5.878	1.449	0.453	0.07	8.337	52.121	0.114	58.049	192.23	7.161	72.541	44.339	0	7.088	97.429
QAP2	0	49.095	3.163	11.235	159.902	121.174	50.557	51.986	588.316	0.643	1.212	195.908	304.152	553.972	38.458	28.094	262.908	25.555	1.557	18.172	61.142	130.818	57.958	56.578	6.099	1.424	0.363	0	8.624	53.738	0	59.607	196.766	7.354	74.22	45.29	0	7.374	99.556
QAP3	0	48.689	3.741	10.985	155.526	118.591	48.442	53.291	566.873	0.663	1.144	190.748	302.915	539.196	37.456	27.314	255.662	24.923	1.508	17.452	59.407	127.126	57.018	55.103	5.913	1.533	0.443	0	8.614	52.366	0	58.56	191.213	7.175	72.278	43.937	0	7.438	96.341
QAP5	0	48.222	4.531	11.178	157.616	120.771	47.851	60.61	568.59	0.433	1.196	194.332	305.584	547.41	38.019	27.766	260.518	25.285	1.543	16.894	60.712	129.954	57.022	56.164	5.917	1.471	0.092	0.136	8.653	53.129	0	60.424	194.59	7.335	73.613	44.836	0	7.26	97.651
QAP7	0	46.489	5.493	10.792	153.606	127.212	44.967	61.912	541.727	0	1.106	187.32	301.386	531.279	40.385	26.632	251.103	24.414	1.48	18.13	58.911	125.392	55.24	54.191	5.796	1.432	0	0.072	8.491	51.438	0	59.084	188.14	7.07	73.338	43.343	0	6.407	94.856
Amino Acid	PSER	TAU2	ASP2	HYP2	THR2	SER2	ASN2	GLU2	GLN2	SAR	AAD	PRO2	GLY2	ALA2	CIT2	ABU	VAL2	MET2	ALLISO	CYS2	ILE2	LEU2	TYR2	PHE2	BALA2	BABA	GBA	HCY	ETN	TRP2	HYL	ORN2	LYS2	1MHIS	HIS2	3MHIS	ANSP	CARSN	ARG2
NMP2	0	38.759	3.466	5.684	96.246	91.435	47.994	47.817	576.044	0	0.415	210.756	270.91	571.115	32.105	13.38	199.333	23.136	1.581	7.13	62.874	129.441	59.156	54.281	9.29	0.777	0	0	10.645	45.909	0	39.869	127.485	4.618	74.836	28.468	0	9.624	66.225
NMP3	0	37.385	3.929	5.575	93.917	88.912	45.467	51.482	557.267	0.963	0	206.432	266.994	556.015	31.341	13.133	194.341	22.7	1.513	4.68	61.442	126.56	57.645	53.832	8.927	0	0	0	10.519	45.21	0	39.188	125.249	4.486	73.412	27.728	0	8.81	67.972
NMP5	0	38.672	5.34	5.814	97.148	98.682	45.868	62.429	560.574	0	0	215.552	280.612	576.652	32.319	13.495	200.774	23.705	1.583	6.157	63.025	130.175	59.798	57.038	9.683	1.192	0	0	11.12	46.282	0	42.27	136.013	4.754	76.793	28.723	0	9.226	81.779
NMP7	0	38.561	7.999	5.806	100.668	117.268	47.586	69.507	559.381	0.571	0	229.19	297.232	585.85	32.48	13.49	204.379	26.172	1.632	6.017	68.143	138.662	61.942	62.541	9.023	0.583	0	0	12.712	47.244	0.536	44.781	164.908	4.813	82.403	29.286	0	7.963	135.57
NMD0	0	37.157	1.727	5.375	96.665	90.776	50.237	0	611.77	0	0	208.737	273.854	572.272	25.13	13.347	199.511	22.745	1.651	43.258	61.527	128.064	56.598	53.627	0	0.979	0.309	0	8.591	46.167	0	37.283	127.97	5.214	75.308	27.915	0	5.569	61.829
NMCB1	0	60.629	4.034	5.572	95.53	94.264	48.35	0	597.232	0	0.313	210.16	277.395	570.226	45.781	13.428	199.223	22.774	1.639	54.719	60.884	129.182	55.646	53.968	0	0.979	0.391	0.096	9.764	47.558	0	40.619	128.362	5.203	75.055	28.724	0	5.564	64.538
NMCB2	0	100.957	7.963	5.729	93.029	98.999	45.409	107.82	523.247	0	0	208.545	267.065	559.083	31.952	13.014	195.405	23.287	1.522	4.474	60.558	129.245	56.778	54.721	10.383	0.388	0.228	0	13.962	46.061	0	43.374	128.547	4.439	73.169	28.044	0	5.381	71.192
NMCB3	0	144.189	10.526	5.84	104.584	106.489	52.158	92.657	564.133	0.32	0	218.394	287.913	587.101	32.26	13.366	205.581	26.745	2.157	6.518	68.97	142.722	62.646	60.348	12.721	0	0	0.383	18.041	48.519	0.085	41.982	139.379	4.569	78.922	28.691	0	6.873	82.21
NMCB5	8.226	157.85	14.999	5.833	109.192	113.389	53.222	106.413	564.883	0	0.319	228.198	309.973	610.619	33.534	13.816	214.614	29.089	1.595	5.139	70.377	150.179	65.644	63.308	13.513	0	0	0.174	20.706	50.328	0	50.584	148.6	4.682	81.384	29.581	0	6.6	81.223
NMCB7	6.086	166.805	21.038	5.76	105.204	128.86	48.354	150.085	511.728	0	0	231.791	311.456	593.111	33.803	13.304	210.643	29.794	1.672	7.289	69.634	148.596	62.35	63.799	12.52	1.248	0	0	21.385	49.957	0	60.001	172.349	4.503	81.001	29.546	0	5.237	119.479
NMP1	0	38.2	2.381	5.491	96.622	91.282	49.983	28.879	609.671	0	0.389	210.855	282.223	574.367	32.52	13.483	200.905	23.001	1.676	53.553	62.333	129.868	57.248	54.44	9.295	1.008	0	0	9.434	46.392	0	38.665	129.439	5.276	75.489	28.256	0	7.018	62.238
QAP0	0	47.196	2.004	10.644	155.128	116.587	50.086	46.411	574.328	1.459	1.078	188.696	289.27	534.062	37.003	27.037	253.587	24.672	1.525	20.421	58.946	126.013	55.904	54.395	5.79	1.373	0	0	8.029	51.485	0	56.915	189.131	7.062	71.246	43.65	0	5.511	95.946
QACB1	0	78.153	3.84	10.396	149.667	113.784	47.787	54.957	549.399	0.955	1.097	183.537	283.276	517.286	35.828	26.128	245.129	23.957	1.435	14.301	57.056	123.42	53.626	52.751	6.071	1.366	0.466	0	9.08	50.201	0	56.095	182.445	6.827	68.834	42.344	0	5.874	92.811
QACB2	0	134.883	7.779	10.606	152.838	125.385	48.753	68.536	554.511	0.637	1.142	192.481	297.432	530.079	36.343	26.769	250.678	26.858	1.529	15.19	60.807	131.325	55.446	56.125	7.243	1.419	0.445	0.274	12.01	53.146	0.161	58.568	208.296	6.94	71.741	43.091	0	5.705	143.04
QACB3	0	156.084	11.326	10.199	149.05	123.214	48.157	77.797	524.599	0.143	1.076	184.413	287.438	510.085	34.449	24.928	240.886	26.931	1.435	15.265	59.488	129.832	55.389	55.675	7.481	1.269	0.371	0.077	14.694	50.585	0.083	55.842	192.051	6.539	69.2	40.867	0	5.328	118.46
QACB5	0	188.243	16.584	10.316	154.536	128.38	49.834	95.022	518.661	0.941	1.068	187.212	295.621	518.146	34.446	25.096	244.938	28.521	1.37	14.284	61.923	135.824	57.208	57.811	8.113	1.317	0	0.019	19.517	51.246	0.08	57.982	187.542	6.62	70.057	40.738	0	5.354	99.88
QACB7	0	222.432	24.03	11.59	174.968	149.326	54.963	117.578	555.467	1.122	1.242	211.945	335.586	583.4	38.424	27.933	275.273	32.716	1.55	20.101	71.621	155.971	64.043	66.742	9.3	1.494	0	0.444	23.212	58.141	0	69.745	214.752	7.338	79.727	46.004	0	4.721	113.945
QAP1	0	47.886	2.626	10.906	156.427	118.495	50.171	49.472	578.222	0.523	1.147	191.93	296.56	542.679	37.636	27.53	257.502	24.998	1.543	21.917	59.734	128.081	57.362	55.272	5.878	1.449	0.453	0.07	8.337	52.121	0.114	58.049	192.23	7.161	72.541	44.339	0	7.088	97.429
QAP2	0	49.095	3.163	11.235	159.902	121.174	50.557	51.986	588.316	0.643	1.212	195.908	304.152	553.972	38.458	28.094	262.908	25.555	1.557	18.172	61.142	130.818	57.958	56.578	6.099	1.424	0.363	0	8.624	53.738	0	59.607	196.766	7.354	74.22	45.29	0	7.374	99.556
QAP3	0	48.689	3.741	10.985	155.526	118.591	48.442	53.291	566.873	0.663	1.144	190.748	302.915	539.196	37.456	27.314	255.662	24.923	1.508	17.452	59.407	127.126	57.018	55.103	5.913	1.533	0.443	0	8.614	52.366	0	58.56	191.213	7.175	72.278	43.937	0	7.438	96.341
QAP5	0	48.222	4.531	11.178	157.616	120.771	47.851	60.61	568.59	0.433	1.196	194.332	305.584	547.41	38.019	27.766	260.518	25.285	1.543	16.894	60.712	129.954	57.022	56.164	5.917	1.471	0.092	0.136	8.653	53.129	0	60.424	194.59	7.335	73.613	44.836	0	7.26	97.651
QAP7	0	46.489	5.493	10.792	153.606	127.212	44.967	61.912	541.727	0	1.106	187.32	301.386	531.279	40.385	26.632	251.103	24.414	1.48	18.13	58.911	125.392	55.24	54.191	5.796	1.432	0	0.072	8.491	51.438	0	59.084	188.14	7.07	73.338	43.343	0	6.407	94.856
Amino Acid	PSER	TAU2	ASP2	HYP2	THR2	SER2	ASN2	GLU2	GLN2	SAR	AAD	PRO2	GLY2	ALA2	CIT2	ABU	VAL2	MET2	ALLISO	CYS2	ILE2	LEU2	TYR2	PHE2	BALA2	BABA	GBA	HCY	ETN	TRP2	HYL	ORN2	LYS2	1MHIS	HIS2	3MHIS	ANSP	CARSN	ARG2
NMP2	0	38.759	3.466	5.684	96.246	91.435	47.994	47.817	576.044	0	0.415	210.756	270.91	571.115	32.105	13.38	199.333	23.136	1.581	7.13	62.874	129.441	59.156	54.281	9.29	0.777	0	0	10.645	45.909	0	39.869	127.485	4.618	74.836	28.468	0	9.624	66.225
NMP3	0	37.385	3.929	5.575	93.917	88.912	45.467	51.482	557.267	0.963	0	206.432	266.994	556.015	31.341	13.133	194.341	22.7	1.513	4.68	61.442	126.56	57.645	53.832	8.927	0	0	0	10.519	45.21	0	39.188	125.249	4.486	73.412	27.728	0	8.81	67.972
NMP5	0	38.672	5.34	5.814	97.148	98.682	45.868	62.429	560.574	0	0	215.552	280.612	576.652	32.319	13.495	200.774	23.705	1.583	6.157	63.025	130.175	59.798	57.038	9.683	1.192	0	0	11.12	46.282	0	42.27	136.013	4.754	76.793	28.723	0	9.226	81.779
NMP7	0	38.561	7.999	5.806	100.668	117.268	47.586	69.507	559.381	0.571	0	229.19	297.232	585.85	32.48	13.49	204.379	26.172	1.632	6.017	68.143	138.662	61.942	62.541	9.023	0.583	0	0	12.712	47.244	0.536	44.781	164.908	4.813	82.403	29.286	0	7.963	135.57
NMD0	0	37.157	1.727	5.375	96.665	90.776	50.237	0	611.77	0	0	208.737	273.854	572.272	25.13	13.347	199.511	22.745	1.651	43.258	61.527	128.064	56.598	53.627	0	0.979	0.309	0	8.591	46.167	0	37.283	127.97	5.214	75.308	27.915	0	5.569	61.829
NMCB1	0	60.629	4.034	5.572	95.53	94.264	48.35	0	597.232	0	0.313	210.16	277.395	570.226	45.781	13.428	199.223	22.774	1.639	54.719	60.884	129.182	55.646	53.968	0	0.979	0.391	0.096	9.764	47.558	0	40.619	128.362	5.203	75.055	28.724	0	5.564	64.538
NMCB2	0	100.957	7.963	5.729	93.029	98.999	45.409	107.82	523.247	0	0	208.545	267.065	559.083	31.952	13.014	195.405	23.287	1.522	4.474	60.558	129.245	56.778	54.721	10.383	0.388	0.228	0	13.962	46.061	0	43.374	128.547	4.439	73.169	28.044	0	5.381	71.192
NMCB3	0	144.189	10.526	5.84	104.584	106.489	52.158	92.657	564.133	0.32	0	218.394	287.913	587.101	32.26	13.366	205.581	26.745	2.157	6.518	68.97	142.722	62.646	60.348	12.721	0	0	0.383	18.041	48.519	0.085	41.982	139.379	4.569	78.922	28.691	0	6.873	82.21
NMCB5	8.226	157.85	14.999	5.833	109.192	113.389	53.222	106.413	564.883	0	0.319	228.198	309.973	610.619	33.534	13.816	214.614	29.089	1.595	5.139	70.377	150.179	65.644	63.308	13.513	0	0	0.174	20.706	50.328	0	50.584	148.6	4.682	81.384	29.581	0	6.6	81.223
NMCB7	6.086	166.805	21.038	5.76	105.204	128.86	48.354	150.085	511.728	0	0	231.791	311.456	593.111	33.803	13.304	210.643	29.794	1.672	7.289	69.634	148.596	62.35	63.799	12.52	1.248	0	0	21.385	49.957	0	60.001	172.349	4.503	81.001	29.546	0	5.237	119.479
NMP1	0	38.2	2.381	5.491	96.622	91.282	49.983	28.879	609.671	0	0.389	210.855	282.223	574.367	32.52	13.483	200.905	23.001	1.676	53.553	62.333	129.868	57.248	54.44	9.295	1.008	0	0	9.434	46.392	0	38.665	129.439	5.276	75.489	28.256	0	7.018	62.238
QAP0	0	47.196	2.004	10.644	155.128	116.587	50.086	46.411	574.328	1.459	1.078	188.696	289.27	534.062	37.003	27.037	253.587	24.672	1.525	20.421	58.946	126.013	55.904	54.395	5.79	1.373	0	0	8.029	51.485	0	56.915	189.131	7.062	71.246	43.65	0	5.511	95.946
QACB1	0	78.153	3.84	10.396	149.667	113.784	47.787	54.957	549.399	0.955	1.097	183.537	283.276	517.286	35.828	26.128	245.129	23.957	1.435	14.301	57.056	123.42	53.626	52.751	6.071	1.366	0.466	0	9.08	50.201	0	56.095	182.445	6.827	68.834	42.344	0	5.874	92.811
QACB2	0	134.883	7.779	10.606	152.838	125.385	48.753	68.536	554.511	0.637	1.142	192.481	297.432	530.079	36.343	26.769	250.678	26.858	1.529	15.19	60.807	131.325	55.446	56.125	7.243	1.419	0.445	0.274	12.01	53.146	0.161	58.568	208.296	6.94	71.741	43.091	0	5.705	143.04
QACB3	0	156.084	11.326	10.199	149.05	123.214	48.157	77.797	524.599	0.143	1.076	184.413	287.438	510.085	34.449	24.928	240.886	26.931	1.435	15.265	59.488	129.832	55.389	55.675	7.481	1.269	0.371	0.077	14.694	50.585	0.083	55.842	192.051	6.539	69.2	40.867	0	5.328	118.46
QACB5	0	188.243	16.584	10.316	154.536	128.38	49.834	95.022	518.661	0.941	1.068	187.212	295.621	518.146	34.446	25.096	244.938	28.521	1.37	14.284	61.923	135.824	57.208	57.811	8.113	1.317	0	0.019	19.517	51.246	0.08	57.982	187.542	6.62	70.057	40.738	0	5.354	99.88
QACB7	0	222.432	24.03	11.59	174.968	149.326	54.963	117.578	555.467	1.122	1.242	211.945	335.586	583.4	38.424	27.933	275.273	32.716	1.55	20.101	71.621	155.971	64.043	66.742	9.3	1.494	0	0.444	23.212	58.141	0	69.745	214.752	7.338	79.727	46.004	0	4.721	113.945
QAP1	0	47.886	2.626	10.906	156.427	118.495	50.171	49.472	578.222	0.523	1.147	191.93	296.56	542.679	37.636	27.53	257.502	24.998	1.543	21.917	59.734	128.081	57.362	55.272	5.878	1.449	0.453	0.07	8.337	52.121	0.114	58.049	192.23	7.161	72.541	44.339	0	7.088	97.429
QAP2	0	49.095	3.163	11.235	159.902	121.174	50.557	51.986	588.316	0.643	1.212	195.908	304.152	553.972	38.458	28.094	262.908	25.555	1.557	18.172	61.142	130.818	57.958	56.578	6.099	1.424	0.363	0	8.624	53.738	0	59.607	196.766	7.354	74.22	45.29	0	7.374	99.556
QAP3	0	48.689	3.741	10.985	155.526	118.591	48.442	53.291	566.873	0.663	1.144	190.748	302.915	539.196	37.456	27.314	255.662	24.923	1.508	17.452	59.407	127.126	57.018	55.103	5.913	1.533	0.443	0	8.614	52.366	0	58.56	191.213	7.175	72.278	43.937	0	7.438	96.341
QAP5	0	48.222	4.531	11.178	157.616	120.771	47.851	60.61	568.59	0.433	1.196	194.332	305.584	547.41	38.019	27.766	260.518	25.285	1.543	16.894	60.712	129.954	57.022	56.164	5.917	1.471	0.092	0.136	8.653	53.129	0	60.424	194.59	7.335	73.613	44.836	0	7.26	97.651
QAP7	0	46.489	5.493	10.792	153.606	127.212	44.967	61.912	541.727	0	1.106	187.32	301.386	531.279	40.385	26.632	251.103	24.414	1.48	18.13	58.911	125.392	55.24	54.191	5.796	1.432	0	0.072	8.491	51.438	0	59.084	188.14	7.07	73.338	43.343	0	6.407	94.856
Amino Acid	PSER	TAU2	ASP2	HYP2	THR2	SER2	ASN2	GLU2	GLN2	SAR	AAD	PRO2	GLY2	ALA2	CIT2	ABU	VAL2	MET2	ALLISO	CYS2	ILE2	LEU2	TYR2	PHE2	BALA2	BABA	GBA	HCY	ETN	TRP2	HYL	ORN2	LYS2	1MHIS	HIS2	3MHIS	ANSP	CARSN	ARG2
NMP2	0	38.759	3.466	5.684	96.246	91.435	47.994	47.817	576.044	0	0.415	210.756	270.91	571.115	32.105	13.38	199.333	23.136	1.581	7.13	62.874	129.441	59.156	54.281	9.29	0.777	0	0	10.645	45.909	0	39.869	127.485	4.618	74.836	28.468	0	9.624	66.225
NMP3	0	37.385	3.929	5.575	93.917	88.912	45.467	51.482	557.267	0.963	0	206.432	266.994	556.015	31.341	13.133	194.341	22.7	1.513	4.68	61.442	126.56	57.645	53.832	8.927	0	0	0	10.519	45.21	0	39.188	125.249	4.486	73.412	27.728	0	8.81	67.972
NMP5	0	38.672	5.34	5.814	97.148	98.682	45.868	62.429	560.574	0	0	215.552	280.612	576.652	32.319	13.495	200.774	23.705	1.583	6.157	63.025	130.175	59.798	57.038	9.683	1.192	0	0	11.12	46.282	0	42.27	136.013	4.754	76.793	28.723	0	9.226	81.779
NMP7	0	38.561	7.999	5.806	100.668	117.268	47.586	69.507	559.381	0.571	0	229.19	297.232	585.85	32.48	13.49	204.379	26.172	1.632	6.017	68.143	138.662	61.942	62.541	9.023	0.583	0	0	12.712	47.244	0.536	44.781	164.908	4.813	82.403	29.286	0	7.963	135.57
NMD0	0	37.157	1.727	5.375	96.665	90.776	50.237	0	611.77	0	0	208.737	273.854	572.272	25.13	13.347	199.511	22.745	1.651	43.258	61.527	128.064	56.598	53.627	0	0.979	0.309	0	8.591	46.167	0	37.283	127.97	5.214	75.308	27.915	0	5.569	61.829
NMCB1	0	60.629	4.034	5.572	95.53	94.264	48.35	0	597.232	0	0.313	210.16	277.395	570.226	45.781	13.428	199.223	22.774	1.639	54.719	60.884	129.182	55.646	53.968	0	0.979	0.391	0.096	9.764	47.558	0	40.619	128.362	5.203	75.055	28.724	0	5.564	64.538
NMCB2	0	100.957	7.963	5.729	93.029	98.999	45.409	107.82	523.247	0	0	208.545	267.065	559.083	31.952	13.014	195.405	23.287	1.522	4.474	60.558	129.245	56.778	54.721	10.383	0.388	0.228	0	13.962	46.061	0	43.374	128.547	4.439	73.169	28.044	0	5.381	71.192
NMCB3	0	144.189	10.526	5.84	104.584	106.489	52.158	92.657	564.133	0.32	0	218.394	287.913	587.101	32.26	13.366	205.581	26.745	2.157	6.518	68.97	142.722	62.646	60.348	12.721	0	0	0.383	18.041	48.519	0.085	41.982	139.379	4.569	78.922	28.691	0	6.873	82.21
NMCB5	8.226	157.85	14.999	5.833	109.192	113.389	53.222	106.413	564.883	0	0.319	228.198	309.973	610.619	33.534	13.816	214.614	29.089	1.595	5.139	70.377	150.179	65.644	63.308	13.513	0	0	0.174	20.706	50.328	0	50.584	148.6	4.682	81.384	29.581	0	6.6	81.223
NMCB7	6.086	166.805	21.038	5.76	105.204	128.86	48.354	150.085	511.728	0	0	231.791	311.456	593.111	33.803	13.304	210.643	29.794	1.672	7.289	69.634	148.596	62.35	63.799	12.52	1.248	0	0	21.385	49.957	0	60.001	172.349	4.503	81.001	29.546	0	5.237	119.479
NMP1	0	38.2	2.381	5.491	96.622	91.282	49.983	28.879	609.671	0	0.389	210.855	282.223	574.367	32.52	13.483	200.905	23.001	1.676	53.553	62.333	129.868	57.248	54.44	9.295	1.008	0	0	9.434	46.392	0	38.665	129.439	5.276	75.489	28.256	0	7.018	62.238
QAP0	0	47.196	2.004	10.644	155.128	116.587	50.086	46.411	574.328	1.459	1.078	188.696	289.27	534.062	37.003	27.037	253.587	24.672	1.525	20.421	58.946	126.013	55.904	54.395	5.79	1.373	0	0	8.029	51.485	0	56.915	189.131	7.062	71.246	43.65	0	5.511	95.946
QACB1	0	78.153	3.84	10.396	149.667	113.784	47.787	54.957	549.399	0.955	1.097	183.537	283.276	517.286	35.828	26.128	245.129	23.957	1.435	14.301	57.056	123.42	53.626	52.751	6.071	1.366	0.466	0	9.08	50.201	0	56.095	182.445	6.827	68.834	42.344	0	5.874	92.811
QACB2	0	134.883	7.779	10.606	152.838	125.385	48.753	68.536	554.511	0.637	1.142	192.481	297.432	530.079	36.343	26.769	250.678	26.858	1.529	15.19	60.807	131.325	55.446	56.125	7.243	1.419	0.445	0.274	12.01	53.146	0.161	58.568	208.296	6.94	71.741	43.091	0	5.705	143.04
QACB3	0	156.084	11.326	10.199	149.05	123.214	48.157	77.797	524.599	0.143	1.076	184.413	287.438	510.085	34.449	24.928	240.886	26.931	1.435	15.265	59.488	129.832	55.389	55.675	7.481	1.269	0.371	0.077	14.694	50.585	0.083	55.842	192.051	6.539	69.2	40.867	0	5.328	118.46
QACB5	0	188.243	16.584	10.316	154.536	128.38	49.834	95.022	518.661	0.941	1.068	187.212	295.621	518.146	34.446	25.096	244.938	28.521	1.37	14.284	61.923	135.824	57.208	57.811	8.113	1.317	0	0.019	19.517	51.246	0.08	57.982	187.542	6.62	70.057	40.738	0	5.354	99.88
QACB7	0	222.432	24.03	11.59	174.968	149.326	54.963	117.578	555.467	1.122	1.242	211.945	335.586	583.4	38.424	27.933	275.273	32.716	1.55	20.101	71.621	155.971	64.043	66.742	9.3	1.494	0	0.444	23.212	58.141	0	69.745	214.752	7.338	79.727	46.004	0	4.721	113.945
QAP1	0	47.886	2.626	10.906	156.427	118.495	50.171	49.472	578.222	0.523	1.147	191.93	296.56	542.679	37.636	27.53	257.502	24.998	1.543	21.917	59.734	128.081	57.362	55.272	5.878	1.449	0.453	0.07	8.337	52.121	0.114	58.049	192.23	7.161	72.541	44.339	0	7.088	97.429
QAP2	0	49.095	3.163	11.235	159.902	121.174	50.557	51.986	588.316	0.643	1.212	195.908	304.152	553.972	38.458	28.094	262.908	25.555	1.557	18.172	61.142	130.818	57.958	56.578	6.099	1.424	0.363	0	8.624	53.738	0	59.607	196.766	7.354	74.22	45.29	0	7.374	99.556
QAP3	0	48.689	3.741	10.985	155.526	118.591	48.442	53.291	566.873	0.663	1.144	190.748	302.915	539.196	37.456	27.314	255.662	24.923	1.508	17.452	59.407	127.126	57.018	55.103	5.913	1.533	0.443	0	8.614	52.366	0	58.56	191.213	7.175	72.278	43.937	0	7.438	96.341
QAP5	0	48.222	4.531	11.178	157.616	120.771	47.851	60.61	568.59	0.433	1.196	194.332	305.584	547.41	38.019	27.766	260.518	25.285	1.543	16.894	60.712	129.954	57.022	56.164	5.917	1.471	0.092	0.136	8.653	53.129	0	60.424	194.59	7.335	73.613	44.836	0	7.26	97.651
QAP7	0	46.489	5.493	10.792	153.606	127.212	44.967	61.912	541.727	0	1.106	187.32	301.386	531.279	40.385	26.632	251.103	24.414	1.48	18.13	58.911	125.392	55.24	54.191	5.796	1.432	0	0.072	8.491	51.438	0	59.084	188.14	7.07	73.338	43.343	0	6.407	94.856
Amino Acid	PSER	TAU2	ASP2	HYP2	THR2	SER2	ASN2	GLU2	GLN2	SAR	AAD	PRO2	GLY2	ALA2	CIT2	ABU	VAL2	MET2	ALLISO	CYS2	ILE2	LEU2	TYR2	PHE2	BALA2	BABA	GBA	HCY	ETN	TRP2	HYL	ORN2	LYS2	1MHIS	HIS2	3MHIS	ANSP	CARSN	ARG2
NMP2	0	38.759	3.466	5.684	96.246	91.435	47.994	47.817	576.044	0	0.415	210.756	270.91	571.115	32.105	13.38	199.333	23.136	1.581	7.13	62.874	129.441	59.156	54.281	9.29	0.777	0	0	10.645	45.909	0	39.869	127.485	4.618	74.836	28.468	0	9.624	66.225
NMP3	0	37.385	3.929	5.575	93.917	88.912	45.467	51.482	557.267	0.963	0	206.432	266.994	556.015	31.341	13.133	194.341	22.7	1.513	4.68	61.442	126.56	57.645	53.832	8.927	0	0	0	10.519	45.21	0	39.188	125.249	4.486	73.412	27.728	0	8.81	67.972
NMP5	0	38.672	5.34	5.814	97.148	98.682	45.868	62.429	560.574	0	0	215.552	280.612	576.652	32.319	13.495	200.774	23.705	1.583	6.157	63.025	130.175	59.798	57.038	9.683	1.192	0	0	11.12	46.282	0	42.27	136.013	4.754	76.793	28.723	0	9.226	81.779
NMP7	0	38.561	7.999	5.806	100.668	117.268	47.586	69.507	559.381	0.571	0	229.19	297.232	585.85	32.48	13.49	204.379	26.172	1.632	6.017	68.143	138.662	61.942	62.541	9.023	0.583	0	0	12.712	47.244	0.536	44.781	164.908	4.813	82.403	29.286	0	7.963	135.57
NMD0	0	37.157	1.727	5.375	96.665	90.776	50.237	0	611.77	0	0	208.737	273.854	572.272	25.13	13.347	199.511	22.745	1.651	43.258	61.527	128.064	56.598	53.627	0	0.979	0.309	0	8.591	46.167	0	37.283	127.97	5.214	75.308	27.915	0	5.569	61.829
NMCB1	0	60.629	4.034	5.572	95.53	94.264	48.35	0	597.232	0	0.313	210.16	277.395	570.226	45.781	13.428	199.223	22.774	1.639	54.719	60.884	129.182	55.646	53.968	0	0.979	0.391	0.096	9.764	47.558	0	40.619	128.362	5.203	75.055	28.724	0	5.564	64.538
NMCB2	0	100.957	7.963	5.729	93.029	98.999	45.409	107.82	523.247	0	0	208.545	267.065	559.083	31.952	13.014	195.405	23.287	1.522	4.474	60.558	129.245	56.778	54.721	10.383	0.388	0.228	0	13.962	46.061	0	43.374	128.547	4.439	73.169	28.044	0	5.381	71.192
NMCB3	0	144.189	10.526	5.84	104.584	106.489	52.158	92.657	564.133	0.32	0	218.394	287.913	587.101	32.26	13.366	205.581	26.745	2.157	6.518	68.97	142.722	62.646	60.348	12.721	0	0	0.383	18.041	48.519	0.085	41.982	139.379	4.569	78.922	28.691	0	6.873	82.21
NMCB5	8.226	157.85	14.999	5.833	109.192	113.389	53.222	106.413	564.883	0	0.319	228.198	309.973	610.619	33.534	13.816	214.614	29.089	1.595	5.139	70.377	150.179	65.644	63.308	13.513	0	0	0.174	20.706	50.328	0	50.584	148.6	4.682	81.384	29.581	0	6.6	81.223
NMCB7	6.086	166.805	21.038	5.76	105.204	128.86	48.354	150.085	511.728	0	0	231.791	311.456	593.111	33.803	13.304	210.643	29.794	1.672	7.289	69.634	148.596	62.35	63.799	12.52	1.248	0	0	21.385	49.957	0	60.001	172.349	4.503	81.001	29.546	0	5.237	119.479
NMP1	0	38.2	2.381	5.491	96.622	91.282	49.983	28.879	609.671	0	0.389	210.855	282.223	574.367	32.52	13.483	200.905	23.001	1.676	53.553	62.333	129.868	57.248	54.44	9.295	1.008	0	0	9.434	46.392	0	38.665	129.439	5.276	75.489	28.256	0	7.018	62.238
QAP0	0	47.196	2.004	10.644	155.128	116.587	50.086	46.411	574.328	1.459	1.078	188.696	289.27	534.062	37.003	27.037	253.587	24.672	1.525	20.421	58.946	126.013	55.904	54.395	5.79	1.373	0	0	8.029	51.485	0	56.915	189.131	7.062	71.246	43.65	0	5.511	95.946
QACB1	0	78.153	3.84	10.396	149.667	113.784	47.787	54.957	549.399	0.955	1.097	183.537	283.276	517.286	35.828	26.128	245.129	23.957	1.435	14.301	57.056	123.42	53.626	52.751	6.071	1.366	0.466	0	9.08	50.201	0	56.095	182.445	6.827	68.834	42.344	0	5.874	92.811
QACB2	0	134.883	7.779	10.606	152.838	125.385	48.753	68.536	554.511	0.637	1.142	192.481	297.432	530.079	36.343	26.769	250.678	26.858	1.529	15.19	60.807	131.325	55.446	56.125	7.243	1.419	0.445	0.274	12.01	53.146	0.161	58.568	208.296	6.94	71.741	43.091	0	5.705	143.04
QACB3	0	156.084	11.326	10.199	149.05	123.214	48.157	77.797	524.599	0.143	1.076	184.413	287.438	510.085	34.449	24.928	240.886	26.931	1.435	15.265	59.488	129.832	55.389	55.675	7.481	1.269	0.371	0.077	14.694	50.585	0.083	55.842	192.051	6.539	69.2	40.867	0	5.328	118.46
QACB5	0	188.243	16.584	10.316	154.536	128.38	49.834	95.022	518.661	0.941	1.068	187.212	295.621	518.146	34.446	25.096	244.938	28.521	1.37	14.284	61.923	135.824	57.208	57.811	8.113	1.317	0	0.019	19.517	51.246	0.08	57.982	187.542	6.62	70.057	40.738	0	5.354	99.88
QACB7	0	222.432	24.03	11.59	174.968	149.326	54.963	117.578	555.467	1.122	1.242	211.945	335.586	583.4	38.424	27.933	275.273	32.716	1.55	20.101	71.621	155.971	64.043	66.742	9.3	1.494	0	0.444	23.212	58.141	0	69.745	214.752	7.338	79.727	46.004	0	4.721	113.945
QAP1	0	47.886	2.626	10.906	156.427	118.495	50.171	49.472	578.222	0.523	1.147	191.93	296.56	542.679	37.636	27.53	257.502	24.998	1.543	21.917	59.734	128.081	57.362	55.272	5.878	1.449	0.453	0.07	8.337	52.121	0.114	58.049	192.23	7.161	72.541	44.339	0	7.088	97.429
QAP2	0	49.095	3.163	11.235	159.902	121.174	50.557	51.986	588.316	0.643	1.212	195.908	304.152	553.972	38.458	28.094	262.908	25.555	1.557	18.172	61.142	130.818	57.958	56.578	6.099	1.424	0.363	0	8.624	53.738	0	59.607	196.766	7.354	74.22	45.29	0	7.374	99.556
QAP3	0	48.689	3.741	10.985	155.526	118.591	48.442	53.291	566.873	0.663	1.144	190.748	302.915	539.196	37.456	27.314	255.662	24.923	1.508	17.452	59.407	127.126	57.018	55.103	5.913	1.533	0.443	0	8.614	52.366	0	58.56	191.213	7.175	72.278	43.937	0	7.438	96.341
QAP5	0	48.222	4.531	11.178	157.616	120.771	47.851	60.61	568.59	0.433	1.196	194.332	305.584	547.41	38.019	27.766	260.518	25.285	1.543	16.894	60.712	129.954	57.022	56.164	5.917	1.471	0.092	0.136	8.653	53.129	0	60.424	194.59	7.335	73.613	44.836	0	7.26	97.651
QAP7	0	46.489	5.493	10.792	153.606	127.212	44.967	61.912	541.727	0	1.106	187.32	301.386	531.279	40.385	26.632	251.103	24.414	1.48	18.13	58.911	125.392	55.24	54.191	5.796	1.432	0	0.072	8.491	51.438	0	59.084	188.14	7.07	73.338	43.343	0	6.407	94.856
Amino Acid	PSER	TAU2	ASP2	HYP2	THR2	SER2	ASN2	GLU2	GLN2	SAR	AAD	PRO2	GLY2	ALA2	CIT2	ABU	VAL2	MET2	ALLISO	CYS2	ILE2	LEU2	TYR2	PHE2	BALA2	BABA	GBA	HCY	ETN	TRP2	HYL	ORN2	LYS2	1MHIS	HIS2	3MHIS	ANSP	CARSN	ARG2
NMP2	0	38.759	3.466	5.684	96.246	91.435	47.994	47.817	576.044	0	0.415	210.756	270.91	571.115	32.105	13.38	199.333	23.136	1.581	7.13	62.874	129.441	59.156	54.281	9.29	0.777	0	0	10.645	45.909	0	39.869	127.485	4.618	74.836	28.468	0	9.624	66.225
NMP3	0	37.385	3.929	5.575	93.917	88.912	45.467	51.482	557.267	0.963	0	206.432	266.994	556.015	31.341	13.133	194.341	22.7	1.513	4.68	61.442	126.56	57.645	53.832	8.927	0	0	0	10.519	45.21	0	39.188	125.249	4.486	73.412	27.728	0	8.81	67.972
NMP5	0	38.672	5.34	5.814	97.148	98.682	45.868	62.429	560.574	0	0	215.552	280.612	576.652	32.319	13.495	200.774	23.705	1.583	6.157	63.025	130.175	59.798	57.038	9.683	1.192	0	0	11.12	46.282	0	42.27	136.013	4.754	76.793	28.723	0	9.226	81.779
NMP7	0	38.561	7.999	5.806	100.668	117.268	47.586	69.507	559.381	0.571	0	229.19	297.232	585.85	32.48	13.49	204.379	26.172	1.632	6.017	68.143	138.662	61.942	62.541	9.023	0.583	0	0	12.712	47.244	0.536	44.781	164.908	4.813	82.403	29.286	0	7.963	135.57
NMD0	0	37.157	1.727	5.375	96.665	90.776	50.237	0	611.77	0	0	208.737	273.854	572.272	25.13	13.347	199.511	22.745	1.651	43.258	61.527	128.064	56.598	53.627	0	0.979	0.309	0	8.591	46.167	0	37.283	127.97	5.214	75.308	27.915	0	5.569	61.829
NMCB1	0	60.629	4.034	5.572	95.53	94.264	48.35	0	597.232	0	0.313	210.16	277.395	570.226	45.781	13.428	199.223	22.774	1.639	54.719	60.884	129.182	55.646	53.968	0	0.979	0.391	0.096	9.764	47.558	0	40.619	128.362	5.203	75.055	28.724	0	5.564	64.538
NMCB2	0	100.957	7.963	5.729	93.029	98.999	45.409	107.82	523.247	0	0	208.545	267.065	559.083	31.952	13.014	195.405	23.287	1.522	4.474	60.558	129.245	56.778	54.721	10.383	0.388	0.228	0	13.962	46.061	0	43.374	128.547	4.439	73.169	28.044	0	5.381	71.192
NMCB3	0	144.189	10.526	5.84	104.584	106.489	52.158	92.657	564.133	0.32	0	218.394	287.913	587.101	32.26	13.366	205.581	26.745	2.157	6.518	68.97	142.722	62.646	60.348	12.721	0	0	0.383	18.041	48.519	0.085	41.982	139.379	4.569	78.922	28.691	0	6.873	82.21
NMCB5	8.226	157.85	14.999	5.833	109.192	113.389	53.222	106.413	564.883	0	0.319	228.198	309.973	610.619	33.534	13.816	214.614	29.089	1.595	5.139	70.377	150.179	65.644	63.308	13.513	0	0	0.174	20.706	50.328	0	50.584	148.6	4.682	81.384	29.581	0	6.6	81.223
NMCB7	6.086	166.805	21.038	5.76	105.204	128.86	48.354	150.085	511.728	0	0	231.791	311.456	593.111	33.803	13.304	210.643	29.794	1.672	7.289	69.634	148.596	62.35	63.799	12.52	1.248	0	0	21.385	49.957	0	60.001	172.349	4.503	81.001	29.546	0	5.237	119.479
NMP1	0	38.2	2.381	5.491	96.622	91.282	49.983	28.879	609.671	0	0.389	210.855	282.223	574.367	32.52	13.483	200.905	23.001	1.676	53.553	62.333	129.868	57.248	54.44	9.295	1.008	0	0	9.434	46.392	0	38.665	129.439	5.276	75.489	28.256	0	7.018	62.238
QAP0	0	47.196	2.004	10.644	155.128	116.587	50.086	46.411	574.328	1.459	1.078	188.696	289.27	534.062	37.003	27.037	253.587	24.672	1.525	20.421	58.946	126.013	55.904	54.395	5.79	1.373	0	0	8.029	51.485	0	56.915	189.131	7.062	71.246	43.65	0	5.511	95.946
QACB1	0	78.153	3.84	10.396	149.667	113.784	47.787	54.957	549.399	0.955	1.097	183.537	283.276	517.286	35.828	26.128	245.129	23.957	1.435	14.301	57.056	123.42	53.626	52.751	6.071	1.366	0.466	0	9.08	50.201	0	56.095	182.445	6.827	68.834	42.344	0	5.874	92.811
QACB2	0	134.883	7.779	10.606	152.838	125.385	48.753	68.536	554.511	0.637	1.142	192.481	297.432	530.079	36.343	26.769	250.678	26.858	1.529	15.19	60.807	131.325	55.446	56.125	7.243	1.419	0.445	0.274	12.01	53.146	0.161	58.568	208.296	6.94	71.741	43.091	0	5.705	143.04
QACB3	0	156.084	11.326	10.199	149.05	123.214	48.157	77.797	524.599	0.143	1.076	184.413	287.438	510.085	34.449	24.928	240.886	26.931	1.435	15.265	59.488	129.832	55.389	55.675	7.481	1.269	0.371	0.077	14.694	50.585	0.083	55.842	192.051	6.539	69.2	40.867	0	5.328	118.46
QACB5	0	188.243	16.584	10.316	154.536	128.38	49.834	95.022	518.661	0.941	1.068	187.212	295.621	518.146	34.446	25.096	244.938	28.521	1.37	14.284	61.923	135.824	57.208	57.811	8.113	1.317	0	0.019	19.517	51.246	0.08	57.982	187.542	6.62	70.057	40.738	0	5.354	99.88
QACB7	0	222.432	24.03	11.59	174.968	149.326	54.963	117.578	555.467	1.122	1.242	211.945	335.586	583.4	38.424	27.933	275.273	32.716	1.55	20.101	71.621	155.971	64.043	66.742	9.3	1.494	0	0.444	23.212	58.141	0	69.745	214.752	7.338	79.727	46.004	0	4.721	113.945
QAP1	0	47.886	2.626	10.906	156.427	118.495	50.171	49.472	578.222	0.523	1.147	191.93	296.56	542.679	37.636	27.53	257.502	24.998	1.543	21.917	59.734	128.081	57.362	55.272	5.878	1.449	0.453	0.07	8.337	52.121	0.114	58.049	192.23	7.161	72.541	44.339	0	7.088	97.429
QAP2	0	49.095	3.163	11.235	159.902	121.174	50.557	51.986	588.316	0.643	1.212	195.908	304.152	553.972	38.458	28.094	262.908	25.555	1.557	18.172	61.142	130.818	57.958	56.578	6.099	1.424	0.363	0	8.624	53.738	0	59.607	196.766	7.354	74.22	45.29	0	7.374	99.556
QAP3	0	48.689	3.741	10.985	155.526	118.591	48.442	53.291	566.873	0.663	1.144	190.748	302.915	539.196	37.456	27.314	255.662	24.923	1.508	17.452	59.407	127.126	57.018	55.103	5.913	1.533	0.443	0	8.614	52.366	0	58.56	191.213	7.175	72.278	43.937	0	7.438	96.341
QAP5	0	48.222	4.531	11.178	157.616	120.771	47.851	60.61	568.59	0.433	1.196	194.332	305.584	547.41	38.019	27.766	260.518	25.285	1.543	16.894	60.712	129.954	57.022	56.164	5.917	1.471	0.092	0.136	8.653	53.129	0	60.424	194.59	7.335	73.613	44.836	0	7.26	97.651
QAP7	0	46.489	5.493	10.792	153.606	127.212	44.967	61.912	541.727	0	1.106	187.32	301.386	531.279	40.385	26.632	251.103	24.414	1.48	18.13	58.911	125.392	55.24	54.191	5.796	1.432	0	0.072	8.491	51.438	0	59.084	188.14	7.07	73.338	43.343	0	6.407	94.856
Amino Acid	PSER	TAU2	ASP2	HYP2	THR2	SER2	ASN2	GLU2	GLN2	SAR	AAD	PRO2	GLY2	ALA2	CIT2	ABU	VAL2	MET2	ALLISO	CYS2	ILE2	LEU2	TYR2	PHE2	BALA2	BABA	GBA	HCY	ETN	TRP2	HYL	ORN2	LYS2	1MHIS	HIS2	3MHIS	ANSP	CARSN	ARG2
NMP2	0	38.759	3.466	5.684	96.246	91.435	47.994	47.817	576.044	0	0.415	210.756	270.91	571.115	32.105	13.38	199.333	23.136	1.581	7.13	62.874	129.441	59.156	54.281	9.29	0.777	0	0	10.645	45.909	0	39.869	127.485	4.618	74.836	28.468	0	9.624	66.225
NMP3	0	37.385	3.929	5.575	93.917	88.912	45.467	51.482	557.267	0.963	0	206.432	266.994	556.015	31.341	13.133	194.341	22.7	1.513	4.68	61.442	126.56	57.645	53.832	8.927	0	0	0	10.519	45.21	0	39.188	125.249	4.486	73.412	27.728	0	8.81	67.972
NMP5	0	38.672	5.34	5.814	97.148	98.682	45.868	62.429	560.574	0	0	215.552	280.612	576.652	32.319	13.495	200.774	23.705	1.583	6.157	63.025	130.175	59.798	57.038	9.683	1.192	0	0	11.12	46.282	0	42.27	136.013	4.754	76.793	28.723	0	9.226	81.779
NMP7	0	38.561	7.999	5.806	100.668	117.268	47.586	69.507	559.381	0.571	0	229.19	297.232	585.85	32.48	13.49	204.379	26.172	1.632	6.017	68.143	138.662	61.942	62.541	9.023	0.583	0	0	12.712	47.244	0.536	44.781	164.908	4.813	82.403	29.286	0	7.963	135.57
NMD0	0	37.157	1.727	5.375	96.665	90.776	50.237	0	611.77	0	0	208.737	273.854	572.272	25.13	13.347	199.511	22.745	1.651	43.258	61.527	128.064	56.598	53.627	0	0.979	0.309	0	8.591	46.167	0	37.283	127.97	5.214	75.308	27.915	0	5.569	61.829
NMCB1	0	60.629	4.034	5.572	95.53	94.264	48.35	0	597.232	0	0.313	210.16	277.395	570.226	45.781	13.428	199.223	22.774	1.639	54.719	60.884	129.182	55.646	53.968	0	0.979	0.391	0.096	9.764	47.558	0	40.619	128.362	5.203	75.055	28.724	0	5.564	64.538
NMCB2	0	100.957	7.963	5.729	93.029	98.999	45.409	107.82	523.247	0	0	208.545	267.065	559.083	31.952	13.014	195.405	23.287	1.522	4.474	60.558	129.245	56.778	54.721	10.383	0.388	0.228	0	13.962	46.061	0	43.374	128.547	4.439	73.169	28.044	0	5.381	71.192
NMCB3	0	144.189	10.526	5.84	104.584	106.489	52.158	92.657	564.133	0.32	0	218.394	287.913	587.101	32.26	13.366	205.581	26.745	2.157	6.518	68.97	142.722	62.646	60.348	12.721	0	0	0.383	18.041	48.519	0.085	41.982	139.379	4.569	78.922	28.691	0	6.873	82.21
NMCB5	8.226	157.85	14.999	5.833	109.192	113.389	53.222	106.413	564.883	0	0.319	228.198	309.973	610.619	33.534	13.816	214.614	29.089	1.595	5.139	70.377	150.179	65.644	63.308	13.513	0	0	0.174	20.706	50.328	0	50.584	148.6	4.682	81.384	29.581	0	6.6	81.223
NMCB7	6.086	166.805	21.038	5.76	105.204	128.86	48.354	150.085	511.728	0	0	231.791	311.456	593.111	33.803	13.304	210.643	29.794	1.672	7.289	69.634	148.596	62.35	63.799	12.52	1.248	0	0	21.385	49.957	0	60.001	172.349	4.503	81.001	29.546	0	5.237	119.479
NMP1	0	38.2	2.381	5.491	96.622	91.282	49.983	28.879	609.671	0	0.389	210.855	282.223	574.367	32.52	13.483	200.905	23.001	1.676	53.553	62.333	129.868	57.248	54.44	9.295	1.008	0	0	9.434	46.392	0	38.665	129.439	5.276	75.489	28.256	0	7.018	62.238
QAP0	0	47.196	2.004	10.644	155.128	116.587	50.086	46.411	574.328	1.459	1.078	188.696	289.27	534.062	37.003	27.037	253.587	24.672	1.525	20.421	58.946	126.013	55.904	54.395	5.79	1.373	0	0	8.029	51.485	0	56.915	189.131	7.062	71.246	43.65	0	5.511	95.946
QACB1	0	78.153	3.84	10.396	149.667	113.784	47.787	54.957	549.399	0.955	1.097	183.537	283.276	517.286	35.828	26.128	245.129	23.957	1.435	14.301	57.056	123.42	53.626	52.751	6.071	1.366	0.466	0	9.08	50.201	0	56.095	182.445	6.827	68.834	42.344	0	5.874	92.811
QACB2	0	134.883	7.779	10.606	152.838	125.385	48.753	68.536	554.511	0.637	1.142	192.481	297.432	530.079	36.343	26.769	250.678	26.858	1.529	15.19	60.807	131.325	55.446	56.125	7.243	1.419	0.445	0.274	12.01	53.146	0.161	58.568	208.296	6.94	71.741	43.091	0	5.705	143.04
QACB3	0	156.084	11.326	10.199	149.05	123.214	48.157	77.797	524.599	0.143	1.076	184.413	287.438	510.085	34.449	24.928	240.886	26.931	1.435	15.265	59.488	129.832	55.389	55.675	7.481	1.269	0.371	0.077	14.694	50.585	0.083	55.842	192.051	6.539	69.2	40.867	0	5.328	118.46
QACB5	0	188.243	16.584	10.316	154.536	128.38	49.834	95.022	518.661	0.941	1.068	187.212	295.621	518.146	34.446	25.096	244.938	28.521	1.37	14.284	61.923	135.824	57.208	57.811	8.113	1.317	0	0.019	19.517	51.246	0.08	57.982	187.542	6.62	70.057	40.738	0	5.354	99.88
QACB7	0	222.432	24.03	11.59	174.968	149.326	54.963	117.578	555.467	1.122	1.242	211.945	335.586	583.4	38.424	27.933	275.273	32.716	1.55	20.101	71.621	155.971	64.043	66.742	9.3	1.494	0	0.444	23.212	58.141	0	69.745	214.752	7.338	79.727	46.004	0	4.721	113.945
QAP1	0	47.886	2.626	10.906	156.427	118.495	50.171	49.472	578.222	0.523	1.147	191.93	296.56	542.679	37.636	27.53	257.502	24.998	1.543	21.917	59.734	128.081	57.362	55.272	5.878	1.449	0.453	0.07	8.337	52.121	0.114	58.049	192.23	7.161	72.541	44.339	0	7.088	97.429
QAP2	0	49.095	3.163	11.235	159.902	121.174	50.557	51.986	588.316	0.643	1.212	195.908	304.152	553.972	38.458	28.094	262.908	25.555	1.557	18.172	61.142	130.818	57.958	56.578	6.099	1.424	0.363	0	8.624	53.738	0	59.607	196.766	7.354	74.22	45.29	0	7.374	99.556
QAP3	0	48.689	3.741	10.985	155.526	118.591	48.442	53.291	566.873	0.663	1.144	190.748	302.915	539.196	37.456	27.314	255.662	24.923	1.508	17.452	59.407	127.126	57.018	55.103	5.913	1.533	0.443	0	8.614	52.366	0	58.56	191.213	7.175	72.278	43.937	0	7.438	96.341
QAP5	0	48.222	4.531	11.178	157.616	120.771	47.851	60.61	568.59	0.433	1.196	194.332	305.584	547.41	38.019	27.766	260.518	25.285	1.543	16.894	60.712	129.954	57.022	56.164	5.917	1.471	0.092	0.136	8.653	53.129	0	60.424	194.59	7.335	73.613	44.836	0	7.26	97.651
QAP7	0	46.489	5.493	10.792	153.606	127.212	44.967	61.912	541.727	0	1.106	187.32	301.386	531.279	40.385	26.632	251.103	24.414	1.48	18.13	58.911	125.392	55.24	54.191	5.796	1.432	0	0.072	8.491	51.438	0	59.084	188.14	7.07	73.338	43.343	0	6.407	94.856
Amino Acid	PSER	TAU2	ASP2	HYP2	THR2	SER2	ASN2	GLU2	GLN2	SAR	AAD	PRO2	GLY2	ALA2	CIT2	ABU	VAL2	MET2	ALLISO	CYS2	ILE2	LEU2	TYR2	PHE2	BALA2	BABA	GBA	HCY	ETN	TRP2	HYL	ORN2	LYS2	1MHIS	HIS2	3MHIS	ANSP	CARSN	ARG2
NMP2	0	38.759	3.466	5.684	96.246	91.435	47.994	47.817	576.044	0	0.415	210.756	270.91	571.115	32.105	13.38	199.333	23.136	1.581	7.13	62.874	129.441	59.156	54.281	9.29	0.777	0	0	10.645	45.909	0	39.869	127.485	4.618	74.836	28.468	0	9.624	66.225
NMP3	0	37.385	3.929	5.575	93.917	88.912	45.467	51.482	557.267	0.963	0	206.432	266.994	556.015	31.341	13.133	194.341	22.7	1.513	4.68	61.442	126.56	57.645	53.832	8.927	0	0	0	10.519	45.21	0	39.188	125.249	4.486	73.412	27.728	0	8.81	67.972
NMP5	0	38.672	5.34	5.814	97.148	98.682	45.868	62.429	560.574	0	0	215.552	280.612	576.652	32.319	13.495	200.774	23.705	1.583	6.157	63.025	130.175	59.798	57.038	9.683	1.192	0	0	11.12	46.282	0	42.27	136.013	4.754	76.793	28.723	0	9.226	81.779
NMP7	0	38.561	7.999	5.806	100.668	117.268	47.586	69.507	559.381	0.571	0	229.19	297.232	585.85	32.48	13.49	204.379	26.172	1.632	6.017	68.143	138.662	61.942	62.541	9.023	0.583	0	0	12.712	47.244	0.536	44.781	164.908	4.813	82.403	29.286	0	7.963	135.57
NMD0	0	37.157	1.727	5.375	96.665	90.776	50.237	0	611.77	0	0	208.737	273.854	572.272	25.13	13.347	199.511	22.745	1.651	43.258	61.527	128.064	56.598	53.627	0	0.979	0.309	0	8.591	46.167	0	37.283	127.97	5.214	75.308	27.915	0	5.569	61.829
NMCB1	0	60.629	4.034	5.572	95.53	94.264	48.35	0	597.232	0	0.313	210.16	277.395	570.226	45.781	13.428	199.223	22.774	1.639	54.719	60.884	129.182	55.646	53.968	0	0.979	0.391	0.096	9.764	47.558	0	40.619	128.362	5.203	75.055	28.724	0	5.564	64.538
NMCB2	0	100.957	7.963	5.729	93.029	98.999	45.409	107.82	523.247	0	0	208.545	267.065	559.083	31.952	13.014	195.405	23.287	1.522	4.474	60.558	129.245	56.778	54.721	10.383	0.388	0.228	0	13.962	46.061	0	43.374	128.547	4.439	73.169	28.044	0	5.381	71.192
NMCB3	0	144.189	10.526	5.84	104.584	106.489	52.158	92.657	564.133	0.32	0	218.394	287.913	587.101	32.26	13.366	205.581	26.745	2.157	6.518	68.97	142.722	62.646	60.348	12.721	0	0	0.383	18.041	48.519	0.085	41.982	139.379	4.569	78.922	28.691	0	6.873	82.21
NMCB5	8.226	157.85	14.999	5.833	109.192	113.389	53.222	106.413	564.883	0	0.319	228.198	309.973	610.619	33.534	13.816	214.614	29.089	1.595	5.139	70.377	150.179	65.644	63.308	13.513	0	0	0.174	20.706	50.328	0	50.584	148.6	4.682	81.384	29.581	0	6.6	81.223
NMCB7	6.086	166.805	21.038	5.76	105.204	128.86	48.354	150.085	511.728	0	0	231.791	311.456	593.111	33.803	13.304	210.643	29.794	1.672	7.289	69.634	148.596	62.35	63.799	12.52	1.248	0	0	21.385	49.957	0	60.001	172.349	4.503	81.001	29.546	0	5.237	119.479
NMP1	0	38.2	2.381	5.491	96.622	91.282	49.983	28.879	609.671	0	0.389	210.855	282.223	574.367	32.52	13.483	200.905	23.001	1.676	53.553	62.333	129.868	57.248	54.44	9.295	1.008	0	0	9.434	46.392	0	38.665	129.439	5.276	75.489	28.256	0	7.018	62.238
QAP0	0	47.196	2.004	10.644	155.128	116.587	50.086	46.411	574.328	1.459	1.078	188.696	289.27	534.062	37.003	27.037	253.587	24.672	1.525	20.421	58.946	126.013	55.904	54.395	5.79	1.373	0	0	8.029	51.485	0	56.915	189.131	7.062	71.246	43.65	0	5.511	95.946
QACB1	0	78.153	3.84	10.396	149.667	113.784	47.787	54.957	549.399	0.955	1.097	183.537	283.276	517.286	35.828	26.128	245.129	23.957	1.435	14.301	57.056	123.42	53.626	52.751	6.071	1.366	0.466	0	9.08	50.201	0	56.095	182.445	6.827	68.834	42.344	0	5.874	92.811
QACB2	0	134.883	7.779	10.606	152.838	125.385	48.753	68.536	554.511	0.637	1.142	192.481	297.432	530.079	36.343	26.769	250.678	26.858	1.529	15.19	60.807	131.325	55.446	56.125	7.243	1.419	0.445	0.274	12.01	53.146	0.161	58.568	208.296	6.94	71.741	43.091	0	5.705	143.04
QACB3	0	156.084	11.326	10.199	149.05	123.214	48.157	77.797	524.599	0.143	1.076	184.413	287.438	510.085	34.449	24.928	240.886	26.931	1.435	15.265	59.488	129.832	55.389	55.675	7.481	1.269	0.371	0.077	14.694	50.585	0.083	55.842	192.051	6.539	69.2	40.867	0	5.328	118.46
QACB5	0	188.243	16.584	10.316	154.536	128.38	49.834	95.022	518.661	0.941	1.068	187.212	295.621	518.146	34.446	25.096	244.938	28.521	1.37	14.284	61.923	135.824	57.208	57.811	8.113	1.317	0	0.019	19.517	51.246	0.08	57.982	187.542	6.62	70.057	40.738	0	5.354	99.88
QACB7	0	222.432	24.03	11.59	174.968	149.326	54.963	117.578	555.467	1.122	1.242	211.945	335.586	583.4	38.424	27.933	275.273	32.716	1.55	20.101	71.621	155.971	64.043	66.742	9.3	1.494	0	0.444	23.212	58.141	0	69.745	214.752	7.338	79.727	46.004	0	4.721	113.945
QAP1	0	47.886	2.626	10.906	156.427	118.495	50.171	49.472	578.222	0.523	1.147	191.93	296.56	542.679	37.636	27.53	257.502	24.998	1.543	21.917	59.734	128.081	57.362	55.272	5.878	1.449	0.453	0.07	8.337	52.121	0.114	58.049	192.23	7.161	72.541	44.339	0	7.088	97.429
QAP2	0	49.095	3.163	11.235	159.902	121.174	50.557	51.986	588.316	0.643	1.212	195.908	304.152	553.972	38.458	28.094	262.908	25.555	1.557	18.172	61.142	130.818	57.958	56.578	6.099	1.424	0.363	0	8.624	53.738	0	59.607	196.766	7.354	74.22	45.29	0	7.374	99.556
QAP3	0	48.689	3.741	10.985	155.526	118.591	48.442	53.291	566.873	0.663	1.144	190.748	302.915	539.196	37.456	27.314	255.662	24.923	1.508	17.452	59.407	127.126	57.018	55.103	5.913	1.533	0.443	0	8.614	52.366	0	58.56	191.213	7.175	72.278	43.937	0	7.438	96.341
QAP5	0	48.222	4.531	11.178	157.616	120.771	47.851	60.61	568.59	0.433	1.196	194.332	305.584	547.41	38.019	27.766	260.518	25.285	1.543	16.894	60.712	129.954	57.022	56.164	5.917	1.471	0.092	0.136	8.653	53.129	0	60.424	194.59	7.335	73.613	44.836	0	7.26	97.651
QAP7	0	46.489	5.493	10.792	153.606	127.212	44.967	61.912	541.727	0	1.106	187.32	301.386	531.279	40.385	26.632	251.103	24.414	1.48	18.13	58.911	125.392	55.24	54.191	5.796	1.432	0	0.072	8.491	51.438	0	59.084	188.14	7.07	73.338	43.343	0	6.407	94.856
Amino Acid	PSER	TAU2	ASP2	HYP2	THR2	SER2	ASN2	GLU2	GLN2	SAR	AAD	PRO2	GLY2	ALA2	CIT2	ABU	VAL2	MET2	ALLISO	CYS2	ILE2	LEU2	TYR2	PHE2	BALA2	BABA	GBA	HCY	ETN	TRP2	HYL	ORN2	LYS2	1MHIS	HIS2	3MHIS	ANSP	CARSN	ARG2
NMP2	0	38.759	3.466	5.684	96.246	91.435	47.994	47.817	576.044	0	0.415	210.756	270.91	571.115	32.105	13.38	199.333	23.136	1.581	7.13	62.874	129.441	59.156	54.281	9.29	0.777	0	0	10.645	45.909	0	39.869	127.485	4.618	74.836	28.468	0	9.624	66.225
NMP3	0	37.385	3.929	5.575	93.917	88.912	45.467	51.482	557.267	0.963	0	206.432	266.994	556.015	31.341	13.133	194.341	22.7	1.513	4.68	61.442	126.56	57.645	53.832	8.927	0	0	0	10.519	45.21	0	39.188	125.249	4.486	73.412	27.728	0	8.81	67.972
NMP5	0	38.672	5.34	5.814	97.148	98.682	45.868	62.429	560.574	0	0	215.552	280.612	576.652	32.319	13.495	200.774	23.705	1.583	6.157	63.025	130.175	59.798	57.038	9.683	1.192	0	0	11.12	46.282	0	42.27	136.013	4.754	76.793	28.723	0	9.226	81.779
NMP7	0	38.561	7.999	5.806	100.668	117.268	47.586	69.507	559.381	0.571	0	229.19	297.232	585.85	32.48	13.49	204.379	26.172	1.632	6.017	68.143	138.662	61.942	62.541	9.023	0.583	0	0	12.712	47.244	0.536	44.781	164.908	4.813	82.403	29.286	0	7.963	135.57
NMD0	0	37.157	1.727	5.375	96.665	90.776	50.237	0	611.77	0	0	208.737	273.854	572.272	25.13	13.347	199.511	22.745	1.651	43.258	61.527	128.064	56.598	53.627	0	0.979	0.309	0	8.591	46.167	0	37.283	127.97	5.214	75.308	27.915	0	5.569	61.829
NMCB1	0	60.629	4.034	5.572	95.53	94.264	48.35	0	597.232	0	0.313	210.16	277.395	570.226	45.781	13.428	199.223	22.774	1.639	54.719	60.884	129.182	55.646	53.968	0	0.979	0.391	0.096	9.764	47.558	0	40.619	128.362	5.203	75.055	28.724	0	5.564	64.538
NMCB2	0	100.957	7.963	5.729	93.029	98.999	45.409	107.82	523.247	0	0	208.545	267.065	559.083	31.952	13.014	195.405	23.287	1.522	4.474	60.558	129.245	56.778	54.721	10.383	0.388	0.228	0	13.962	46.061	0	43.374	128.547	4.439	73.169	28.044	0	5.381	71.192
NMCB3	0	144.189	10.526	5.84	104.584	106.489	52.158	92.657	564.133	0.32	0	218.394	287.913	587.101	32.26	13.366	205.581	26.745	2.157	6.518	68.97	142.722	62.646	60.348	12.721	0	0	0.383	18.041	48.519	0.085	41.982	139.379	4.569	78.922	28.691	0	6.873	82.21
NMCB5	8.226	157.85	14.999	5.833	109.192	113.389	53.222	106.413	564.883	0	0.319	228.198	309.973	610.619	33.534	13.816	214.614	29.089	1.595	5.139	70.377	150.179	65.644	63.308	13.513	0	0	0.174	20.706	50.328	0	50.584	148.6	4.682	81.384	29.581	0	6.6	81.223
NMCB7	6.086	166.805	21.038	5.76	105.204	128.86	48.354	150.085	511.728	0	0	231.791	311.456	593.111	33.803	13.304	210.643	29.794	1.672	7.289	69.634	148.596	62.35	63.799	12.52	1.248	0	0	21.385	49.957	0	60.001	172.349	4.503	81.001	29.546	0	5.237	119.479
NMP1	0	38.2	2.381	5.491	96.622	91.282	49.983	28.879	609.671	0	0.389	210.855	282.223	574.367	32.52	13.483	200.905	23.001	1.676	53.553	62.333	129.868	57.248	54.44	9.295	1.008	0	0	9.434	46.392	0	38.665	129.439	5.276	75.489	28.256	0	7.018	62.238
QAP0	0	47.196	2.004	10.644	155.128	116.587	50.086	46.411	574.328	1.459	1.078	188.696	289.27	534.062	37.003	27.037	253.587	24.672	1.525	20.421	58.946	126.013	55.904	54.395	5.79	1.373	0	0	8.029	51.485	0	56.915	189.131	7.062	71.246	43.65	0	5.511	95.946
QACB1	0	78.153	3.84	10.396	149.667	113.784	47.787	54.957	549.399	0.955	1.097	183.537	283.276	517.286	35.828	26.128	245.129	23.957	1.435	14.301	57.056	123.42	53.626	52.751	6.071	1.366	0.466	0	9.08	50.201	0	56.095	182.445	6.827	68.834	42.344	0	5.874	92.811
QACB2	0	134.883	7.779	10.606	152.838	125.385	48.753	68.536	554.511	0.637	1.142	192.481	297.432	530.079	36.343	26.769	250.678	26.858	1.529	15.19	60.807	131.325	55.446	56.125	7.243	1.419	0.445	0.274	12.01	53.146	0.161	58.568	208.296	6.94	71.741	43.091	0	5.705	143.04
QACB3	0	156.084	11.326	10.199	149.05	123.214	48.157	77.797	524.599	0.143	1.076	184.413	287.438	510.085	34.449	24.928	240.886	26.931	1.435	15.265	59.488	129.832	55.389	55.675	7.481	1.269	0.371	0.077	14.694	50.585	0.083	55.842	192.051	6.539	69.2	40.867	0	5.328	118.46
QACB5	0	188.243	16.584	10.316	154.536	128.38	49.834	95.022	518.661	0.941	1.068	187.212	295.621	518.146	34.446	25.096	244.938	28.521	1.37	14.284	61.923	135.824	57.208	57.811	8.113	1.317	0	0.019	19.517	51.246	0.08	57.982	187.542	6.62	70.057	40.738	0	5.354	99.88
QACB7	0	222.432	24.03	11.59	174.968	149.326	54.963	117.578	555.467	1.122	1.242	211.945	335.586	583.4	38.424	27.933	275.273	32.716	1.55	20.101	71.621	155.971	64.043	66.742	9.3	1.494	0	0.444	23.212	58.141	0	69.745	214.752	7.338	79.727	46.004	0	4.721	113.945
QAP1	0	47.886	2.626	10.906	156.427	118.495	50.171	49.472	578.222	0.523	1.147	191.93	296.56	542.679	37.636	27.53	257.502	24.998	1.543	21.917	59.734	128.081	57.362	55.272	5.878	1.449	0.453	0.07	8.337	52.121	0.114	58.049	192.23	7.161	72.541	44.339	0	7.088	97.429
QAP2	0	49.095	3.163	11.235	159.902	121.174	50.557	51.986	588.316	0.643	1.212	195.908	304.152	553.972	38.458	28.094	262.908	25.555	1.557	18.172	61.142	130.818	57.958	56.578	6.099	1.424	0.363	0	8.624	53.738	0	59.607	196.766	7.354	74.22	45.29	0	7.374	99.556
QAP3	0	48.689	3.741	10.985	155.526	118.591	48.442	53.291	566.873	0.663	1.144	190.748	302.915	539.196	37.456	27.314	255.662	24.923	1.508	17.452	59.407	127.126	57.018	55.103	5.913	1.533	0.443	0	8.614	52.366	0	58.56	191.213	7.175	72.278	43.937	0	7.438	96.341
QAP5	0	48.222	4.531	11.178	157.616	120.771	47.851	60.61	568.59	0.433	1.196	194.332	305.584	547.41	38.019	27.766	260.518	25.285	1.543	16.894	60.712	129.954	57.022	56.164	5.917	1.471	0.092	0.136	8.653	53.129	0	60.424	194.59	7.335	73.613	44.836	0	7.26	97.651
QAP7	0	46.489	5.493	10.792	153.606	127.212	44.967	61.912	541.727	0	1.106	187.32	301.386	531.279	40.385	26.632	251.103	24.414	1.48	18.13	58.911	125.392	55.24	54.191	5.796	1.432	0	0.072	8.491	51.438	0	59.084	188.14	7.07	73.338	43.343	0	6.407	94.856
Amino Acid	PSER	TAU2	ASP2	HYP2	THR2	SER2	ASN2	GLU2	GLN2	SAR	AAD	PRO2	GLY2	ALA2	CIT2	ABU	VAL2	MET2	ALLISO	CYS2	ILE2	LEU2	TYR2	PHE2	BALA2	BABA	GBA	HCY	ETN	TRP2	HYL	ORN2	LYS2	1MHIS	HIS2	3MHIS	ANSP	CARSN	ARG2
NMP2	0	38.759	3.466	5.684	96.246	91.435	47.994	47.817	576.044	0	0.415	210.756	270.91	571.115	32.105	13.38	199.333	23.136	1.581	7.13	62.874	129.441	59.156	54.281	9.29	0.777	0	0	10.645	45.909	0	39.869	127.485	4.618	74.836	28.468	0	9.624	66.225
NMP3	0	37.385	3.929	5.575	93.917	88.912	45.467	51.482	557.267	0.963	0	206.432	266.994	556.015	31.341	13.133	194.341	22.7	1.513	4.68	61.442	126.56	57.645	53.832	8.927	0	0	0	10.519	45.21	0	39.188	125.249	4.486	73.412	27.728	0	8.81	67.972
NMP5	0	38.672	5.34	5.814	97.148	98.682	45.868	62.429	560.574	0	0	215.552	280.612	576.652	32.319	13.495	200.774	23.705	1.583	6.157	63.025	130.175	59.798	57.038	9.683	1.192	0	0	11.12	46.282	0	42.27	136.013	4.754	76.793	28.723	0	9.226	81.779
NMP7	0	38.561	7.999	5.806	100.668	117.268	47.586	69.507	559.381	0.571	0	229.19	297.232	585.85	32.48	13.49	204.379	26.172	1.632	6.017	68.143	138.662	61.942	62.541	9.023	0.583	0	0	12.712	47.244	0.536	44.781	164.908	4.813	82.403	29.286	0	7.963	135.57
NMD0	0	37.157	1.727	5.375	96.665	90.776	50.237	0	611.77	0	0	208.737	273.854	572.272	25.13	13.347	199.511	22.745	1.651	43.258	61.527	128.064	56.598	53.627	0	0.979	0.309	0	8.591	46.167	0	37.283	127.97	5.214	75.308	27.915	0	5.569	61.829
NMCB1	0	60.629	4.034	5.572	95.53	94.264	48.35	0	597.232	0	0.313	210.16	277.395	570.226	45.781	13.428	199.223	22.774	1.639	54.719	60.884	129.182	55.646	53.968	0	0.979	0.391	0.096	9.764	47.558	0	40.619	128.362	5.203	75.055	28.724	0	5.564	64.538
NMCB2	0	100.957	7.963	5.729	93.029	98.999	45.409	107.82	523.247	0	0	208.545	267.065	559.083	31.952	13.014	195.405	23.287	1.522	4.474	60.558	129.245	56.778	54.721	10.383	0.388	0.228	0	13.962	46.061	0	43.374	128.547	4.439	73.169	28.044	0	5.381	71.192
NMCB3	0	144.189	10.526	5.84	104.584	106.489	52.158	92.657	564.133	0.32	0	218.394	287.913	587.101	32.26	13.366	205.581	26.745	2.157	6.518	68.97	142.722	62.646	60.348	12.721	0	0	0.383	18.041	48.519	0.085	41.982	139.379	4.569	78.922	28.691	0	6.873	82.21
NMCB5	8.226	157.85	14.999	5.833	109.192	113.389	53.222	106.413	564.883	0	0.319	228.198	309.973	610.619	33.534	13.816	214.614	29.089	1.595	5.139	70.377	150.179	65.644	63.308	13.513	0	0	0.174	20.706	50.328	0	50.584	148.6	4.682	81.384	29.581	0	6.6	81.223
NMCB7	6.086	166.805	21.038	5.76	105.204	128.86	48.354	150.085	511.728	0	0	231.791	311.456	593.111	33.803	13.304	210.643	29.794	1.672	7.289	69.634	148.596	62.35	63.799	12.52	1.248	0	0	21.385	49.957	0	60.001	172.349	4.503	81.001	29.546	0	5.237	119.479
NMP1	0	38.2	2.381	5.491	96.622	91.282	49.983	28.879	609.671	0	0.389	210.855	282.223	574.367	32.52	13.483	200.905	23.001	1.676	53.553	62.333	129.868	57.248	54.44	9.295	1.008	0	0	9.434	46.392	0	38.665	129.439	5.276	75.489	28.256	0	7.018	62.238
QAP0	0	47.196	2.004	10.644	155.128	116.587	50.086	46.411	574.328	1.459	1.078	188.696	289.27	534.062	37.003	27.037	253.587	24.672	1.525	20.421	58.946	126.013	55.904	54.395	5.79	1.373	0	0	8.029	51.485	0	56.915	189.131	7.062	71.246	43.65	0	5.511	95.946
QACB1	0	78.153	3.84	10.396	149.667	113.784	47.787	54.957	549.399	0.955	1.097	183.537	283.276	517.286	35.828	26.128	245.129	23.957	1.435	14.301	57.056	123.42	53.626	52.751	6.071	1.366	0.466	0	9.08	50.201	0	56.095	182.445	6.827	68.834	42.344	0	5.874	92.811
QACB2	0	134.883	7.779	10.606	152.838	125.385	48.753	68.536	554.511	0.637	1.142	192.481	297.432	530.079	36.343	26.769	250.678	26.858	1.529	15.19	60.807	131.325	55.446	56.125	7.243	1.419	0.445	0.274	12.01	53.146	0.161	58.568	208.296	6.94	71.741	43.091	0	5.705	143.04
QACB3	0	156.084	11.326	10.199	149.05	123.214	48.157	77.797	524.599	0.143	1.076	184.413	287.438	510.085	34.449	24.928	240.886	26.931	1.435	15.265	59.488	129.832	55.389	55.675	7.481	1.269	0.371	0.077	14.694	50.585	0.083	55.842	192.051	6.539	69.2	40.867	0	5.328	118.46
QACB5	0	188.243	16.584	10.316	154.536	128.38	49.834	95.022	518.661	0.941	1.068	187.212	295.621	518.146	34.446	25.096	244.938	28.521	1.37	14.284	61.923	135.824	57.208	57.811	8.113	1.317	0	0.019	19.517	51.246	0.08	57.982	187.542	6.62	70.057	40.738	0	5.354	99.88
QACB7	0	222.432	24.03	11.59	174.968	149.326	54.963	117.578	555.467	1.122	1.242	211.945	335.586	583.4	38.424	27.933	275.273	32.716	1.55	20.101	71.621	155.971	64.043	66.742	9.3	1.494	0	0.444	23.212	58.141	0	69.745	214.752	7.338	79.727	46.004	0	4.721	113.945
QAP1	0	47.886	2.626	10.906	156.427	118.495	50.171	49.472	578.222	0.523	1.147	191.93	296.56	542.679	37.636	27.53	257.502	24.998	1.543	21.917	59.734	128.081	57.362	55.272	5.878	1.449	0.453	0.07	8.337	52.121	0.114	58.049	192.23	7.161	72.541	44.339	0	7.088	97.429
QAP2	0	49.095	3.163	11.235	159.902	121.174	50.557	51.986	588.316	0.643	1.212	195.908	304.152	553.972	38.458	28.094	262.908	25.555	1.557	18.172	61.142	130.818	57.958	56.578	6.099	1.424	0.363	0	8.624	53.738	0	59.607	196.766	7.354	74.22	45.29	0	7.374	99.556
QAP3	0	48.689	3.741	10.985	155.526	118.591	48.442	53.291	566.873	0.663	1.144	190.748	302.915	539.196	37.456	27.314	255.662	24.923	1.508	17.452	59.407	127.126	57.018	55.103	5.913	1.533	0.443	0	8.614	52.366	0	58.56	191.213	7.175	72.278	43.937	0	7.438	96.341
QAP5	0	48.222	4.531	11.178	157.616	120.771	47.851	60.61	568.59	0.433	1.196	194.332	305.584	547.41	38.019	27.766	260.518	25.285	1.543	16.894	60.712	129.954	57.022	56.164	5.917	1.471	0.092	0.136	8.653	53.129	0	60.424	194.59	7.335	73.613	44.836	0	7.26	97.651
QAP7	0	46.489	5.493	10.792	153.606	127.212	44.967	61.912	541.727	0	1.106	187.32	301.386	531.279	40.385	26.632	251.103	24.414	1.48	18.13	58.911	125.392	55.24	54.191	5.796	1.432	0	0.072	8.491	51.438	0	59.084	188.14	7.07	73.338	43.343	0	6.407	94.856
Amino Acid	PSER	TAU2	ASP2	HYP2	THR2	SER2	ASN2	GLU2	GLN2	SAR	AAD	PRO2	GLY2	ALA2	CIT2	ABU	VAL2	MET2	ALLISO	CYS2	ILE2	LEU2	TYR2	PHE2	BALA2	BABA	GBA	HCY	ETN	TRP2	HYL	ORN2	LYS2	1MHIS	HIS2	3MHIS	ANSP	CARSN	ARG2
NMP2	0	38.759	3.466	5.684	96.246	91.435	47.994	47.817	576.044	0	0.415	210.756	270.91	571.115	32.105	13.38	199.333	23.136	1.581	7.13	62.874	129.441	59.156	54.281	9.29	0.777	0	0	10.645	45.909	0	39.869	127.485	4.618	74.836	28.468	0	9.624	66.225
NMP3	0	37.385	3.929	5.575	93.917	88.912	45.467	51.482	557.267	0.963	0	206.432	266.994	556.015	31.341	13.133	194.341	22.7	1.513	4.68	61.442	126.56	57.645	53.832	8.927	0	0	0	10.519	45.21	0	39.188	125.249	4.486	73.412	27.728	0	8.81	67.972
NMP5	0	38.672	5.34	5.814	97.148	98.682	45.868	62.429	560.574	0	0	215.552	280.612	576.652	32.319	13.495	200.774	23.705	1.583	6.157	63.025	130.175	59.798	57.038	9.683	1.192	0	0	11.12	46.282	0	42.27	136.013	4.754	76.793	28.723	0	9.226	81.779
NMP7	0	38.561	7.999	5.806	100.668	117.268	47.586	69.507	559.381	0.571	0	229.19	297.232	585.85	32.48	13.49	204.379	26.172	1.632	6.017	68.143	138.662	61.942	62.541	9.023	0.583	0	0	12.712	47.244	0.536	44.781	164.908	4.813	82.403	29.286	0	7.963	135.57
NMD0	0	37.157	1.727	5.375	96.665	90.776	50.237	0	611.77	0	0	208.737	273.854	572.272	25.13	13.347	199.511	22.745	1.651	43.258	61.527	128.064	56.598	53.627	0	0.979	0.309	0	8.591	46.167	0	37.283	127.97	5.214	75.308	27.915	0	5.569	61.829
NMCB1	0	60.629	4.034	5.572	95.53	94.264	48.35	0	597.232	0	0.313	210.16	277.395	570.226	45.781	13.428	199.223	22.774	1.639	54.719	60.884	129.182	55.646	53.968	0	0.979	0.391	0.096	9.764	47.558	0	40.619	128.362	5.203	75.055	28.724	0	5.564	64.538
NMCB2	0	100.957	7.963	5.729	93.029	98.999	45.409	107.82	523.247	0	0	208.545	267.065	559.083	31.952	13.014	195.405	23.287	1.522	4.474	60.558	129.245	56.778	54.721	10.383	0.388	0.228	0	13.962	46.061	0	43.374	128.547	4.439	73.169	28.044	0	5.381	71.192
NMCB3	0	144.189	10.526	5.84	104.584	106.489	52.158	92.657	564.133	0.32	0	218.394	287.913	587.101	32.26	13.366	205.581	26.745	2.157	6.518	68.97	142.722	62.646	60.348	12.721	0	0	0.383	18.041	48.519	0.085	41.982	139.379	4.569	78.922	28.691	0	6.873	82.21
NMCB5	8.226	157.85	14.999	5.833	109.192	113.389	53.222	106.413	564.883	0	0.319	228.198	309.973	610.619	33.534	13.816	214.614	29.089	1.595	5.139	70.377	150.179	65.644	63.308	13.513	0	0	0.174	20.706	50.328	0	50.584	148.6	4.682	81.384	29.581	0	6.6	81.223
NMCB7	6.086	166.805	21.038	5.76	105.204	128.86	48.354	150.085	511.728	0	0	231.791	311.456	593.111	33.803	13.304	210.643	29.794	1.672	7.289	69.634	148.596	62.35	63.799	12.52	1.248	0	0	21.385	49.957	0	60.001	172.349	4.503	81.001	29.546	0	5.237	119.479
NMP1	0	38.2	2.381	5.491	96.622	91.282	49.983	28.879	609.671	0	0.389	210.855	282.223	574.367	32.52	13.483	200.905	23.001	1.676	53.553	62.333	129.868	57.248	54.44	9.295	1.008	0	0	9.434	46.392	0	38.665	129.439	5.276	75.489	28.256	0	7.018	62.238
QAP0	0	47.196	2.004	10.644	155.128	116.587	50.086	46.411	574.328	1.459	1.078	188.696	289.27	534.062	37.003	27.037	253.587	24.672	1.525	20.421	58.946	126.013	55.904	54.395	5.79	1.373	0	0	8.029	51.485	0	56.915	189.131	7.062	71.246	43.65	0	5.511	95.946
QACB1	0	78.153	3.84	10.396	149.667	113.784	47.787	54.957	549.399	0.955	1.097	183.537	283.276	517.286	35.828	26.128	245.129	23.957	1.435	14.301	57.056	123.42	53.626	52.751	6.071	1.366	0.466	0	9.08	50.201	0	56.095	182.445	6.827	68.834	42.344	0	5.874	92.811
QACB2	0	134.883	7.779	10.606	152.838	125.385	48.753	68.536	554.511	0.637	1.142	192.481	297.432	530.079	36.343	26.769	250.678	26.858	1.529	15.19	60.807	131.325	55.446	56.125	7.243	1.419	0.445	0.274	12.01	53.146	0.161	58.568	208.296	6.94	71.741	43.091	0	5.705	143.04
QACB3	0	156.084	11.326	10.199	149.05	123.214	48.157	77.797	524.599	0.143	1.076	184.413	287.438	510.085	34.449	24.928	240.886	26.931	1.435	15.265	59.488	129.832	55.389	55.675	7.481	1.269	0.371	0.077	14.694	50.585	0.083	55.842	192.051	6.539	69.2	40.867	0	5.328	118.46
QACB5	0	188.243	16.584	10.316	154.536	128.38	49.834	95.022	518.661	0.941	1.068	187.212	295.621	518.146	34.446	25.096	244.938	28.521	1.37	14.284	61.923	135.824	57.208	57.811	8.113	1.317	0	0.019	19.517	51.246	0.08	57.982	187.542	6.62	70.057	40.738	0	5.354	99.88
QACB7	0	222.432	24.03	11.59	174.968	149.326	54.963	117.578	555.467	1.122	1.242	211.945	335.586	583.4	38.424	27.933	275.273	32.716	1.55	20.101	71.621	155.971	64.043	66.742	9.3	1.494	0	0.444	23.212	58.141	0	69.745	214.752	7.338	79.727	46.004	0	4.721	113.945
QAP1	0	47.886	2.626	10.906	156.427	118.495	50.171	49.472	578.222	0.523	1.147	191.93	296.56	542.679	37.636	27.53	257.502	24.998	1.543	21.917	59.734	128.081	57.362	55.272	5.878	1.449	0.453	0.07	8.337	52.121	0.114	58.049	192.23	7.161	72.541	44.339	0	7.088	97.429
QAP2	0	49.095	3.163	11.235	159.902	121.174	50.557	51.986	588.316	0.643	1.212	195.908	304.152	553.972	38.458	28.094	262.908	25.555	1.557	18.172	61.142	130.818	57.958	56.578	6.099	1.424	0.363	0	8.624	53.738	0	59.607	196.766	7.354	74.22	45.29	0	7.374	99.556
QAP3	0	48.689	3.741	10.985	155.526	118.591	48.442	53.291	566.873	0.663	1.144	190.748	302.915	539.196	37.456	27.314	255.662	24.923	1.508	17.452	59.407	127.126	57.018	55.103	5.913	1.533	0.443	0	8.614	52.366	0	58.56	191.213	7.175	72.278	43.937	0	7.438	96.341
QAP5	0	48.222	4.531	11.178	157.616	120.771	47.851	60.61	568.59	0.433	1.196	194.332	305.584	547.41	38.019	27.766	260.518	25.285	1.543	16.894	60.712	129.954	57.022	56.164	5.917	1.471	0.092	0.136	8.653	53.129	0	60.424	194.59	7.335	73.613	44.836	0	7.26	97.651
QAP7	0	46.489	5.493	10.792	153.606	127.212	44.967	61.912	541.727	0	1.106	187.32	301.386	531.279	40.385	26.632	251.103	24.414	1.48	18.13	58.911	125.392	55.24	54.191	5.796	1.432	0	0.072	8.491	51.438	0	59.084	188.14	7.07	73.338	43.343	0	6.407	94.856
Amino Acid	PSER	TAU2	ASP2	HYP2	THR2	SER2	ASN2	GLU2	GLN2	SAR	AAD	PRO2	GLY2	ALA2	CIT2	ABU	VAL2	MET2	ALLISO	CYS2	ILE2	LEU2	TYR2	PHE2	BALA2	BABA	GBA	HCY	ETN	TRP2	HYL	ORN2	LYS2	1MHIS	HIS2	3MHIS	ANSP	CARSN	ARG2
NMP2	0	38.759	3.466	5.684	96.246	91.435	47.994	47.817	576.044	0	0.415	210.756	270.91	571.115	32.105	13.38	199.333	23.136	1.581	7.13	62.874	129.441	59.156	54.281	9.29	0.777	0	0	10.645	45.909	0	39.869	127.485	4.618	74.836	28.468	0	9.624	66.225
NMP3	0	37.385	3.929	5.575	93.917	88.912	45.467	51.482	557.267	0.963	0	206.432	266.994	556.015	31.341	13.133	194.341	22.7	1.513	4.68	61.442	126.56	57.645	53.832	8.927	0	0	0	10.519	45.21	0	39.188	125.249	4.486	73.412	27.728	0	8.81	67.972
NMP5	0	38.672	5.34	5.814	97.148	98.682	45.868	62.429	560.574	0	0	215.552	280.612	576.652	32.319	13.495	200.774	23.705	1.583	6.157	63.025	130.175	59.798	57.038	9.683	1.192	0	0	11.12	46.282	0	42.27	136.013	4.754	76.793	28.723	0	9.226	81.779
NMP7	0	38.561	7.999	5.806	100.668	117.268	47.586	69.507	559.381	0.571	0	229.19	297.232	585.85	32.48	13.49	204.379	26.172	1.632	6.017	68.143	138.662	61.942	62.541	9.023	0.583	0	0	12.712	47.244	0.536	44.781	164.908	4.813	82.403	29.286	0	7.963	135.57
NMD0	0	37.157	1.727	5.375	96.665	90.776	50.237	0	611.77	0	0	208.737	273.854	572.272	25.13	13.347	199.511	22.745	1.651	43.258	61.527	128.064	56.598	53.627	0	0.979	0.309	0	8.591	46.167	0	37.283	127.97	5.214	75.308	27.915	0	5.569	61.829
NMCB1	0	60.629	4.034	5.572	95.53	94.264	48.35	0	597.232	0	0.313	210.16	277.395	570.226	45.781	13.428	199.223	22.774	1.639	54.719	60.884	129.182	55.646	53.968	0	0.979	0.391	0.096	9.764	47.558	0	40.619	128.362	5.203	75.055	28.724	0	5.564	64.538
NMCB2	0	100.957	7.963	5.729	93.029	98.999	45.409	107.82	523.247	0	0	208.545	267.065	559.083	31.952	13.014	195.405	23.287	1.522	4.474	60.558	129.245	56.778	54.721	10.383	0.388	0.228	0	13.962	46.061	0	43.374	128.547	4.439	73.169	28.044	0	5.381	71.192
NMCB3	0	144.189	10.526	5.84	104.584	106.489	52.158	92.657	564.133	0.32	0	218.394	287.913	587.101	32.26	13.366	205.581	26.745	2.157	6.518	68.97	142.722	62.646	60.348	12.721	0	0	0.383	18.041	48.519	0.085	41.982	139.379	4.569	78.922	28.691	0	6.873	82.21
NMCB5	8.226	157.85	14.999	5.833	109.192	113.389	53.222	106.413	564.883	0	0.319	228.198	309.973	610.619	33.534	13.816	214.614	29.089	1.595	5.139	70.377	150.179	65.644	63.308	13.513	0	0	0.174	20.706	50.328	0	50.584	148.6	4.682	81.384	29.581	0	6.6	81.223
NMCB7	6.086	166.805	21.038	5.76	105.204	128.86	48.354	150.085	511.728	0	0	231.791	311.456	593.111	33.803	13.304	210.643	29.794	1.672	7.289	69.634	148.596	62.35	63.799	12.52	1.248	0	0	21.385	49.957	0	60.001	172.349	4.503	81.001	29.546	0	5.237	119.479
NMP1	0	38.2	2.381	5.491	96.622	91.282	49.983	28.879	609.671	0	0.389	210.855	282.223	574.367	32.52	13.483	200.905	23.001	1.676	53.553	62.333	129.868	57.248	54.44	9.295	1.008	0	0	9.434	46.392	0	38.665	129.439	5.276	75.489	28.256	0	7.018	62.238
QAP0	0	47.196	2.004	10.644	155.128	116.587	50.086	46.411	574.328	1.459	1.078	188.696	289.27	534.062	37.003	27.037	253.587	24.672	1.525	20.421	58.946	126.013	55.904	54.395	5.79	1.373	0	0	8.029	51.485	0	56.915	189.131	7.062	71.246	43.65	0	5.511	95.946
QACB1	0	78.153	3.84	10.396	149.667	113.784	47.787	54.957	549.399	0.955	1.097	183.537	283.276	517.286	35.828	26.128	245.129	23.957	1.435	14.301	57.056	123.42	53.626	52.751	6.071	1.366	0.466	0	9.08	50.201	0	56.095	182.445	6.827	68.834	42.344	0	5.874	92.811
QACB2	0	134.883	7.779	10.606	152.838	125.385	48.753	68.536	554.511	0.637	1.142	192.481	297.432	530.079	36.343	26.769	250.678	26.858	1.529	15.19	60.807	131.325	55.446	56.125	7.243	1.419	0.445	0.274	12.01	53.146	0.161	58.568	208.296	6.94	71.741	43.091	0	5.705	143.04
QACB3	0	156.084	11.326	10.199	149.05	123.214	48.157	77.797	524.599	0.143	1.076	184.413	287.438	510.085	34.449	24.928	240.886	26.931	1.435	15.265	59.488	129.832	55.389	55.675	7.481	1.269	0.371	0.077	14.694	50.585	0.083	55.842	192.051	6.539	69.2	40.867	0	5.328	118.46
QACB5	0	188.243	16.584	10.316	154.536	128.38	49.834	95.022	518.661	0.941	1.068	187.212	295.621	518.146	34.446	25.096	244.938	28.521	1.37	14.284	61.923	135.824	57.208	57.811	8.113	1.317	0	0.019	19.517	51.246	0.08	57.982	187.542	6.62	70.057	40.738	0	5.354	99.88
QACB7	0	222.432	24.03	11.59	174.968	149.326	54.963	117.578	555.467	1.122	1.242	211.945	335.586	583.4	38.424	27.933	275.273	32.716	1.55	20.101	71.621	155.971	64.043	66.742	9.3	1.494	0	0.444	23.212	58.141	0	69.745	214.752	7.338	79.727	46.004	0	4.721	113.945
QAP1	0	47.886	2.626	10.906	156.427	118.495	50.171	49.472	578.222	0.523	1.147	191.93	296.56	542.679	37.636	27.53	257.502	24.998	1.543	21.917	59.734	128.081	57.362	55.272	5.878	1.449	0.453	0.07	8.337	52.121	0.114	58.049	192.23	7.161	72.541	44.339	0	7.088	97.429
QAP2	0	49.095	3.163	11.235	159.902	121.174	50.557	51.986	588.316	0.643	1.212	195.908	304.152	553.972	38.458	28.094	262.908	25.555	1.557	18.172	61.142	130.818	57.958	56.578	6.099	1.424	0.363	0	8.624	53.738	0	59.607	196.766	7.354	74.22	45.29	0	7.374	99.556
QAP3	0	48.689	3.741	10.985	155.526	118.591	48.442	53.291	566.873	0.663	1.144	190.748	302.915	539.196	37.456	27.314	255.662	24.923	1.508	17.452	59.407	127.126	57.018	55.103	5.913	1.533	0.443	0	8.614	52.366	0	58.56	191.213	7.175	72.278	43.937	0	7.438	96.341
QAP5	0	48.222	4.531	11.178	157.616	120.771	47.851	60.61	568.59	0.433	1.196	194.332	305.584	547.41	38.019	27.766	260.518	25.285	1.543	16.894	60.712	129.954	57.022	56.164	5.917	1.471	0.092	0.136	8.653	53.129	0	60.424	194.59	7.335	73.613	44.836	0	7.26	97.651
QAP7	0	46.489	5.493	10.792	153.606	127.212	44.967	61.912	541.727	0	1.106	187.32	301.386	531.279	40.385	26.632	251.103	24.414	1.48	18.13	58.911	125.392	55.24	54.191	5.796	1.432	0	0.072	8.491	51.438	0	59.084	188.14	7.07	73.338	43.343	0	6.407	94.856
Amino Acid	PSER	TAU2	ASP2	HYP2	THR2	SER2	ASN2	GLU2	GLN2	SAR	AAD	PRO2	GLY2	ALA2	CIT2	ABU	VAL2	MET2	ALLISO	CYS2	ILE2	LEU2	TYR2	PHE2	BALA2	BABA	GBA	HCY	ETN	TRP2	HYL	ORN2	LYS2	1MHIS	HIS2	3MHIS	ANSP	CARSN	ARG2
NMP2	0	38.759	3.466	5.684	96.246	91.435	47.994	47.817	576.044	0	0.415	210.756	270.91	571.115	32.105	13.38	199.333	23.136	1.581	7.13	62.874	129.441	59.156	54.281	9.29	0.777	0	0	10.645	45.909	0	39.869	127.485	4.618	74.836	28.468	0	9.624	66.225
NMP3	0	37.385	3.929	5.575	93.917	88.912	45.467	51.482	557.267	0.963	0	206.432	266.994	556.015	31.341	13.133	194.341	22.7	1.513	4.68	61.442	126.56	57.645	53.832	8.927	0	0	0	10.519	45.21	0	39.188	125.249	4.486	73.412	27.728	0	8.81	67.972
NMP5	0	38.672	5.34	5.814	97.148	98.682	45.868	62.429	560.574	0	0	215.552	280.612	576.652	32.319	13.495	200.774	23.705	1.583	6.157	63.025	130.175	59.798	57.038	9.683	1.192	0	0	11.12	46.282	0	42.27	136.013	4.754	76.793	28.723	0	9.226	81.779
NMP7	0	38.561	7.999	5.806	100.668	117.268	47.586	69.507	559.381	0.571	0	229.19	297.232	585.85	32.48	13.49	204.379	26.172	1.632	6.017	68.143	138.662	61.942	62.541	9.023	0.583	0	0	12.712	47.244	0.536	44.781	164.908	4.813	82.403	29.286	0	7.963	135.57
NMD0	0	37.157	1.727	5.375	96.665	90.776	50.237	0	611.77	0	0	208.737	273.854	572.272	25.13	13.347	199.511	22.745	1.651	43.258	61.527	128.064	56.598	53.627	0	0.979	0.309	0	8.591	46.167	0	37.283	127.97	5.214	75.308	27.915	0	5.569	61.829
NMCB1	0	60.629	4.034	5.572	95.53	94.264	48.35	0	597.232	0	0.313	210.16	277.395	570.226	45.781	13.428	199.223	22.774	1.639	54.719	60.884	129.182	55.646	53.968	0	0.979	0.391	0.096	9.764	47.558	0	40.619	128.362	5.203	75.055	28.724	0	5.564	64.538
NMCB2	0	100.957	7.963	5.729	93.029	98.999	45.409	107.82	523.247	0	0	208.545	267.065	559.083	31.952	13.014	195.405	23.287	1.522	4.474	60.558	129.245	56.778	54.721	10.383	0.388	0.228	0	13.962	46.061	0	43.374	128.547	4.439	73.169	28.044	0	5.381	71.192
NMCB3	0	144.189	10.526	5.84	104.584	106.489	52.158	92.657	564.133	0.32	0	218.394	287.913	587.101	32.26	13.366	205.581	26.745	2.157	6.518	68.97	142.722	62.646	60.348	12.721	0	0	0.383	18.041	48.519	0.085	41.982	139.379	4.569	78.922	28.691	0	6.873	82.21
NMCB5	8.226	157.85	14.999	5.833	109.192	113.389	53.222	106.413	564.883	0	0.319	228.198	309.973	610.619	33.534	13.816	214.614	29.089	1.595	5.139	70.377	150.179	65.644	63.308	13.513	0	0	0.174	20.706	50.328	0	50.584	148.6	4.682	81.384	29.581	0	6.6	81.223
NMCB7	6.086	166.805	21.038	5.76	105.204	128.86	48.354	150.085	511.728	0	0	231.791	311.456	593.111	33.803	13.304	210.643	29.794	1.672	7.289	69.634	148.596	62.35	63.799	12.52	1.248	0	0	21.385	49.957	0	60.001	172.349	4.503	81.001	29.546	0	5.237	119.479
NMP1	0	38.2	2.381	5.491	96.622	91.282	49.983	28.879	609.671	0	0.389	210.855	282.223	574.367	32.52	13.483	200.905	23.001	1.676	53.553	62.333	129.868	57.248	54.44	9.295	1.008	0	0	9.434	46.392	0	38.665	129.439	5.276	75.489	28.256	0	7.018	62.238
QAP0	0	47.196	2.004	10.644	155.128	116.587	50.086	46.411	574.328	1.459	1.078	188.696	289.27	534.062	37.003	27.037	253.587	24.672	1.525	20.421	58.946	126.013	55.904	54.395	5.79	1.373	0	0	8.029	51.485	0	56.915	189.131	7.062	71.246	43.65	0	5.511	95.946
QACB1	0	78.153	3.84	10.396	149.667	113.784	47.787	54.957	549.399	0.955	1.097	183.537	283.276	517.286	35.828	26.128	245.129	23.957	1.435	14.301	57.056	123.42	53.626	52.751	6.071	1.366	0.466	0	9.08	50.201	0	56.095	182.445	6.827	68.834	42.344	0	5.874	92.811
QACB2	0	134.883	7.779	10.606	152.838	125.385	48.753	68.536	554.511	0.637	1.142	192.481	297.432	530.079	36.343	26.769	250.678	26.858	1.529	15.19	60.807	131.325	55.446	56.125	7.243	1.419	0.445	0.274	12.01	53.146	0.161	58.568	208.296	6.94	71.741	43.091	0	5.705	143.04
QACB3	0	156.084	11.326	10.199	149.05	123.214	48.157	77.797	524.599	0.143	1.076	184.413	287.438	510.085	34.449	24.928	240.886	26.931	1.435	15.265	59.488	129.832	55.389	55.675	7.481	1.269	0.371	0.077	14.694	50.585	0.083	55.842	192.051	6.539	69.2	40.867	0	5.328	118.46
QACB5	0	188.243	16.584	10.316	154.536	128.38	49.834	95.022	518.661	0.941	1.068	187.212	295.621	518.146	34.446	25.096	244.938	28.521	1.37	14.284	61.923	135.824	57.208	57.811	8.113	1.317	0	0.019	19.517	51.246	0.08	57.982	187.542	6.62	70.057	40.738	0	5.354	99.88
QACB7	0	222.432	24.03	11.59	174.968	149.326	54.963	117.578	555.467	1.122	1.242	211.945	335.586	583.4	38.424	27.933	275.273	32.716	1.55	20.101	71.621	155.971	64.043	66.742	9.3	1.494	0	0.444	23.212	58.141	0	69.745	214.752	7.338	79.727	46.004	0	4.721	113.945
QAP1	0	47.886	2.626	10.906	156.427	118.495	50.171	49.472	578.222	0.523	1.147	191.93	296.56	542.679	37.636	27.53	257.502	24.998	1.543	21.917	59.734	128.081	57.362	55.272	5.878	1.449	0.453	0.07	8.337	52.121	0.114	58.049	192.23	7.161	72.541	44.339	0	7.088	97.429
QAP2	0	49.095	3.163	11.235	159.902	121.174	50.557	51.986	588.316	0.643	1.212	195.908	304.152	553.972	38.458	28.094	262.908	25.555	1.557	18.172	61.142	130.818	57.958	56.578	6.099	1.424	0.363	0	8.624	53.738	0	59.607	196.766	7.354	74.22	45.29	0	7.374	99.556
QAP3	0	48.689	3.741	10.985	155.526	118.591	48.442	53.291	566.873	0.663	1.144	190.748	302.915	539.196	37.456	27.314	255.662	24.923	1.508	17.452	59.407	127.126	57.018	55.103	5.913	1.533	0.443	0	8.614	52.366	0	58.56	191.213	7.175	72.278	43.937	0	7.438	96.341
QAP5	0	48.222	4.531	11.178	157.616	120.771	47.851	60.61	568.59	0.433	1.196	194.332	305.584	547.41	38.019	27.766	260.518	25.285	1.543	16.894	60.712	129.954	57.022	56.164	5.917	1.471	0.092	0.136	8.653	53.129	0	60.424	194.59	7.335	73.613	44.836	0	7.26	97.651
QAP7	0	46.489	5.493	10.792	153.606	127.212	44.967	61.912	541.727	0	1.106	187.32	301.386	531.279	40.385	26.632	251.103	24.414	1.48	18.13	58.911	125.392	55.24	54.191	5.796	1.432	0	0.072	8.491	51.438	0	59.084	188.14	7.07	73.338	43.343	0	6.407	94.856
Amino Acid	PSER	TAU2	ASP2	HYP2	THR2	SER2	ASN2	GLU2	GLN2	SAR	AAD	PRO2	GLY2	ALA2	CIT2	ABU	VAL2	MET2	ALLISO	CYS2	ILE2	LEU2	TYR2	PHE2	BALA2	BABA	GBA	HCY	ETN	TRP2	HYL	ORN2	LYS2	1MHIS	HIS2	3MHIS	ANSP	CARSN	ARG2
NMP2	0	38.759	3.466	5.684	96.246	91.435	47.994	47.817	576.044	0	0.415	210.756	270.91	571.115	32.105	13.38	199.333	23.136	1.581	7.13	62.874	129.441	59.156	54.281	9.29	0.777	0	0	10.645	45.909	0	39.869	127.485	4.618	74.836	28.468	0	9.624	66.225
NMP3	0	37.385	3.929	5.575	93.917	88.912	45.467	51.482	557.267	0.963	0	206.432	266.994	556.015	31.341	13.133	194.341	22.7	1.513	4.68	61.442	126.56	57.645	53.832	8.927	0	0	0	10.519	45.21	0	39.188	125.249	4.486	73.412	27.728	0	8.81	67.972
NMP5	0	38.672	5.34	5.814	97.148	98.682	45.868	62.429	560.574	0	0	215.552	280.612	576.652	32.319	13.495	200.774	23.705	1.583	6.157	63.025	130.175	59.798	57.038	9.683	1.192	0	0	11.12	46.282	0	42.27	136.013	4.754	76.793	28.723	0	9.226	81.779
NMP7	0	38.561	7.999	5.806	100.668	117.268	47.586	69.507	559.381	0.571	0	229.19	297.232	585.85	32.48	13.49	204.379	26.172	1.632	6.017	68.143	138.662	61.942	62.541	9.023	0.583	0	0	12.712	47.244	0.536	44.781	164.908	4.813	82.403	29.286	0	7.963	135.57
NMD0	0	37.157	1.727	5.375	96.665	90.776	50.237	0	611.77	0	0	208.737	273.854	572.272	25.13	13.347	199.511	22.745	1.651	43.258	61.527	128.064	56.598	53.627	0	0.979	0.309	0	8.591	46.167	0	37.283	127.97	5.214	75.308	27.915	0	5.569	61.829
NMCB1	0	60.629	4.034	5.572	95.53	94.264	48.35	0	597.232	0	0.313	210.16	277.395	570.226	45.781	13.428	199.223	22.774	1.639	54.719	60.884	129.182	55.646	53.968	0	0.979	0.391	0.096	9.764	47.558	0	40.619	128.362	5.203	75.055	28.724	0	5.564	64.538
NMCB2	0	100.957	7.963	5.729	93.029	98.999	45.409	107.82	523.247	0	0	208.545	267.065	559.083	31.952	13.014	195.405	23.287	1.522	4.474	60.558	129.245	56.778	54.721	10.383	0.388	0.228	0	13.962	46.061	0	43.374	128.547	4.439	73.169	28.044	0	5.381	71.192
NMCB3	0	144.189	10.526	5.84	104.584	106.489	52.158	92.657	564.133	0.32	0	218.394	287.913	587.101	32.26	13.366	205.581	26.745	2.157	6.518	68.97	142.722	62.646	60.348	12.721	0	0	0.383	18.041	48.519	0.085	41.982	139.379	4.569	78.922	28.691	0	6.873	82.21
NMCB5	8.226	157.85	14.999	5.833	109.192	113.389	53.222	106.413	564.883	0	0.319	228.198	309.973	610.619	33.534	13.816	214.614	29.089	1.595	5.139	70.377	150.179	65.644	63.308	13.513	0	0	0.174	20.706	50.328	0	50.584	148.6	4.682	81.384	29.581	0	6.6	81.223
NMCB7	6.086	166.805	21.038	5.76	105.204	128.86	48.354	150.085	511.728	0	0	231.791	311.456	593.111	33.803	13.304	210.643	29.794	1.672	7.289	69.634	148.596	62.35	63.799	12.52	1.248	0	0	21.385	49.957	0	60.001	172.349	4.503	81.001	29.546	0	5.237	119.479
NMP1	0	38.2	2.381	5.491	96.622	91.282	49.983	28.879	609.671	0	0.389	210.855	282.223	574.367	32.52	13.483	200.905	23.001	1.676	53.553	62.333	129.868	57.248	54.44	9.295	1.008	0	0	9.434	46.392	0	38.665	129.439	5.276	75.489	28.256	0	7.018	62.238
QAP0	0	47.196	2.004	10.644	155.128	116.587	50.086	46.411	574.328	1.459	1.078	188.696	289.27	534.062	37.003	27.037	253.587	24.672	1.525	20.421	58.946	126.013	55.904	54.395	5.79	1.373	0	0	8.029	51.485	0	56.915	189.131	7.062	71.246	43.65	0	5.511	95.946
QACB1	0	78.153	3.84	10.396	149.667	113.784	47.787	54.957	549.399	0.955	1.097	183.537	283.276	517.286	35.828	26.128	245.129	23.957	1.435	14.301	57.056	123.42	53.626	52.751	6.071	1.366	0.466	0	9.08	50.201	0	56.095	182.445	6.827	68.834	42.344	0	5.874	92.811
QACB2	0	134.883	7.779	10.606	152.838	125.385	48.753	68.536	554.511	0.637	1.142	192.481	297.432	530.079	36.343	26.769	250.678	26.858	1.529	15.19	60.807	131.325	55.446	56.125	7.243	1.419	0.445	0.274	12.01	53.146	0.161	58.568	208.296	6.94	71.741	43.091	0	5.705	143.04
QACB3	0	156.084	11.326	10.199	149.05	123.214	48.157	77.797	524.599	0.143	1.076	184.413	287.438	510.085	34.449	24.928	240.886	26.931	1.435	15.265	59.488	129.832	55.389	55.675	7.481	1.269	0.371	0.077	14.694	50.585	0.083	55.842	192.051	6.539	69.2	40.867	0	5.328	118.46
QACB5	0	188.243	16.584	10.316	154.536	128.38	49.834	95.022	518.661	0.941	1.068	187.212	295.621	518.146	34.446	25.096	244.938	28.521	1.37	14.284	61.923	135.824	57.208	57.811	8.113	1.317	0	0.019	19.517	51.246	0.08	57.982	187.542	6.62	70.057	40.738	0	5.354	99.88
QACB7	0	222.432	24.03	11.59	174.968	149.326	54.963	117.578	555.467	1.122	1.242	211.945	335.586	583.4	38.424	27.933	275.273	32.716	1.55	20.101	71.621	155.971	64.043	66.742	9.3	1.494	0	0.444	23.212	58.141	0	69.745	214.752	7.338	79.727	46.004	0	4.721	113.945
QAP1	0	47.886	2.626	10.906	156.427	118.495	50.171	49.472	578.222	0.523	1.147	191.93	296.56	542.679	37.636	27.53	257.502	24.998	1.543	21.917	59.734	128.081	57.362	55.272	5.878	1.449	0.453	0.07	8.337	52.121	0.114	58.049	192.23	7.161	72.541	44.339	0	7.088	97.429
QAP2	0	49.095	3.163	11.235	159.902	121.174	50.557	51.986	588.316	0.643	1.212	195.908	304.152	553.972	38.458	28.094	262.908	25.555	1.557	18.172	61.142	130.818	57.958	56.578	6.099	1.424	0.363	0	8.624	53.738	0	59.607	196.766	7.354	74.22	45.29	0	7.374	99.556
QAP3	0	48.689	3.741	10.985	155.526	118.591	48.442	53.291	566.873	0.663	1.144	190.748	302.915	539.196	37.456	27.314	255.662	24.923	1.508	17.452	59.407	127.126	57.018	55.103	5.913	1.533	0.443	0	8.614	52.366	0	58.56	191.213	7.175	72.278	43.937	0	7.438	96.341
QAP5	0	48.222	4.531	11.178	157.616	120.771	47.851	60.61	568.59	0.433	1.196	194.332	305.584	547.41	38.019	27.766	260.518	25.285	1.543	16.894	60.712	129.954	57.022	56.164	5.917	1.471	0.092	0.136	8.653	53.129	0	60.424	194.59	7.335	73.613	44.836	0	7.26	97.651
QAP7	0	46.489	5.493	10.792	153.606	127.212	44.967	61.912	541.727	0	1.106	187.32	301.386	531.279	40.385	26.632	251.103	24.414	1.48	18.13	58.911	125.392	55.24	54.191	5.796	1.432	0	0.072	8.491	51.438	0	59.084	188.14	7.07	73.338	43.343	0	6.407	94.856
Amino Acid	PSER	TAU2	ASP2	HYP2	THR2	SER2	ASN2	GLU2	GLN2	SAR	AAD	PRO2	GLY2	ALA2	CIT2	ABU	VAL2	MET2	ALLISO	CYS2	ILE2	LEU2	TYR2	PHE2	BALA2	BABA	GBA	HCY	ETN	TRP2	HYL	ORN2	LYS2	1MHIS	HIS2	3MHIS	ANSP	CARSN	ARG2
NMP2	0	38.759	3.466	5.684	96.246	91.435	47.994	47.817	576.044	0	0.415	210.756	270.91	571.115	32.105	13.38	199.333	23.136	1.581	7.13	62.874	129.441	59.156	54.281	9.29	0.777	0	0	10.645	45.909	0	39.869	127.485	4.618	74.836	28.468	0	9.624	66.225
NMP3	0	37.385	3.929	5.575	93.917	88.912	45.467	51.482	557.267	0.963	0	206.432	266.994	556.015	31.341	13.133	194.341	22.7	1.513	4.68	61.442	126.56	57.645	53.832	8.927	0	0	0	10.519	45.21	0	39.188	125.249	4.486	73.412	27.728	0	8.81	67.972
NMP5	0	38.672	5.34	5.814	97.148	98.682	45.868	62.429	560.574	0	0	215.552	280.612	576.652	32.319	13.495	200.774	23.705	1.583	6.157	63.025	130.175	59.798	57.038	9.683	1.192	0	0	11.12	46.282	0	42.27	136.013	4.754	76.793	28.723	0	9.226	81.779
NMP7	0	38.561	7.999	5.806	100.668	117.268	47.586	69.507	559.381	0.571	0	229.19	297.232	585.85	32.48	13.49	204.379	26.172	1.632	6.017	68.143	138.662	61.942	62.541	9.023	0.583	0	0	12.712	47.244	0.536	44.781	164.908	4.813	82.403	29.286	0	7.963	135.57
NMD0	0	37.157	1.727	5.375	96.665	90.776	50.237	0	611.77	0	0	208.737	273.854	572.272	25.13	13.347	199.511	22.745	1.651	43.258	61.527	128.064	56.598	53.627	0	0.979	0.309	0	8.591	46.167	0	37.283	127.97	5.214	75.308	27.915	0	5.569	61.829
NMCB1	0	60.629	4.034	5.572	95.53	94.264	48.35	0	597.232	0	0.313	210.16	277.395	570.226	45.781	13.428	199.223	22.774	1.639	54.719	60.884	129.182	55.646	53.968	0	0.979	0.391	0.096	9.764	47.558	0	40.619	128.362	5.203	75.055	28.724	0	5.564	64.538
NMCB2	0	100.957	7.963	5.729	93.029	98.999	45.409	107.82	523.247	0	0	208.545	267.065	559.083	31.952	13.014	195.405	23.287	1.522	4.474	60.558	129.245	56.778	54.721	10.383	0.388	0.228	0	13.962	46.061	0	43.374	128.547	4.439	73.169	28.044	0	5.381	71.192
NMCB3	0	144.189	10.526	5.84	104.584	106.489	52.158	92.657	564.133	0.32	0	218.394	287.913	587.101	32.26	13.366	205.581	26.745	2.157	6.518	68.97	142.722	62.646	60.348	12.721	0	0	0.383	18.041	48.519	0.085	41.982	139.379	4.569	78.922	28.691	0	6.873	82.21
NMCB5	8.226	157.85	14.999	5.833	109.192	113.389	53.222	106.413	564.883	0	0.319	228.198	309.973	610.619	33.534	13.816	214.614	29.089	1.595	5.139	70.377	150.179	65.644	63.308	13.513	0	0	0.174	20.706	50.328	0	50.584	148.6	4.682	81.384	29.581	0	6.6	81.223
NMCB7	6.086	166.805	21.038	5.76	105.204	128.86	48.354	150.085	511.728	0	0	231.791	311.456	593.111	33.803	13.304	210.643	29.794	1.672	7.289	69.634	148.596	62.35	63.799	12.52	1.248	0	0	21.385	49.957	0	60.001	172.349	4.503	81.001	29.546	0	5.237	119.479
NMP1	0	38.2	2.381	5.491	96.622	91.282	49.983	28.879	609.671	0	0.389	210.855	282.223	574.367	32.52	13.483	200.905	23.001	1.676	53.553	62.333	129.868	57.248	54.44	9.295	1.008	0	0	9.434	46.392	0	38.665	129.439	5.276	75.489	28.256	0	7.018	62.238
QAP0	0	47.196	2.004	10.644	155.128	116.587	50.086	46.411	574.328	1.459	1.078	188.696	289.27	534.062	37.003	27.037	253.587	24.672	1.525	20.421	58.946	126.013	55.904	54.395	5.79	1.373	0	0	8.029	51.485	0	56.915	189.131	7.062	71.246	43.65	0	5.511	95.946
QACB1	0	78.153	3.84	10.396	149.667	113.784	47.787	54.957	549.399	0.955	1.097	183.537	283.276	517.286	35.828	26.128	245.129	23.957	1.435	14.301	57.056	123.42	53.626	52.751	6.071	1.366	0.466	0	9.08	50.201	0	56.095	182.445	6.827	68.834	42.344	0	5.874	92.811
QACB2	0	134.883	7.779	10.606	152.838	125.385	48.753	68.536	554.511	0.637	1.142	192.481	297.432	530.079	36.343	26.769	250.678	26.858	1.529	15.19	60.807	131.325	55.446	56.125	7.243	1.419	0.445	0.274	12.01	53.146	0.161	58.568	208.296	6.94	71.741	43.091	0	5.705	143.04
QACB3	0	156.084	11.326	10.199	149.05	123.214	48.157	77.797	524.599	0.143	1.076	184.413	287.438	510.085	34.449	24.928	240.886	26.931	1.435	15.265	59.488	129.832	55.389	55.675	7.481	1.269	0.371	0.077	14.694	50.585	0.083	55.842	192.051	6.539	69.2	40.867	0	5.328	118.46
QACB5	0	188.243	16.584	10.316	154.536	128.38	49.834	95.022	518.661	0.941	1.068	187.212	295.621	518.146	34.446	25.096	244.938	28.521	1.37	14.284	61.923	135.824	57.208	57.811	8.113	1.317	0	0.019	19.517	51.246	0.08	57.982	187.542	6.62	70.057	40.738	0	5.354	99.88
QACB7	0	222.432	24.03	11.59	174.968	149.326	54.963	117.578	555.467	1.122	1.242	211.945	335.586	583.4	38.424	27.933	275.273	32.716	1.55	20.101	71.621	155.971	64.043	66.742	9.3	1.494	0	0.444	23.212	58.141	0	69.745	214.752	7.338	79.727	46.004	0	4.721	113.945
QAP1	0	47.886	2.626	10.906	156.427	118.495	50.171	49.472	578.222	0.523	1.147	191.93	296.56	542.679	37.636	27.53	257.502	24.998	1.543	21.917	59.734	128.081	57.362	55.272	5.878	1.449	0.453	0.07	8.337	52.121	0.114	58.049	192.23	7.161	72.541	44.339	0	7.088	97.429
QAP2	0	49.095	3.163	11.235	159.902	121.174	50.557	51.986	588.316	0.643	1.212	195.908	304.152	553.972	38.458	28.094	262.908	25.555	1.557	18.172	61.142	130.818	57.958	56.578	6.099	1.424	0.363	0	8.624	53.738	0	59.607	196.766	7.354	74.22	45.29	0	7.374	99.556
QAP3	0	48.689	3.741	10.985	155.526	118.591	48.442	53.291	566.873	0.663	1.144	190.748	302.915	539.196	37.456	27.314	255.662	24.923	1.508	17.452	59.407	127.126	57.018	55.103	5.913	1.533	0.443	0	8.614	52.366	0	58.56	191.213	7.175	72.278	43.937	0	7.438	96.341
QAP5	0	48.222	4.531	11.178	157.616	120.771	47.851	60.61	568.59	0.433	1.196	194.332	305.584	547.41	38.019	27.766	260.518	25.285	1.543	16.894	60.712	129.954	57.022	56.164	5.917	1.471	0.092	0.136	8.653	53.129	0	60.424	194.59	7.335	73.613	44.836	0	7.26	97.651
QAP7	0	46.489	5.493	10.792	153.606	127.212	44.967	61.912	541.727	0	1.106	187.32	301.386	531.279	40.385	26.632	251.103	24.414	1.48	18.13	58.911	125.392	55.24	54.191	5.796	1.432	0	0.072	8.491	51.438	0	59.084	188.14	7.07	73.338	43.343	0	6.407	94.856
Amino Acid	PSER	TAU2	ASP2	HYP2	THR2	SER2	ASN2	GLU2	GLN2	SAR	AAD	PRO2	GLY2	ALA2	CIT2	ABU	VAL2	MET2	ALLISO	CYS2	ILE2	LEU2	TYR2	PHE2	BALA2	BABA	GBA	HCY	ETN	TRP2	HYL	ORN2	LYS2	1MHIS	HIS2	3MHIS	ANSP	CARSN	ARG2
NMP2	0	38.759	3.466	5.684	96.246	91.435	47.994	47.817	576.044	0	0.415	210.756	270.91	571.115	32.105	13.38	199.333	23.136	1.581	7.13	62.874	129.441	59.156	54.281	9.29	0.777	0	0	10.645	45.909	0	39.869	127.485	4.618	74.836	28.468	0	9.624	66.225
NMP3	0	37.385	3.929	5.575	93.917	88.912	45.467	51.482	557.267	0.963	0	206.432	266.994	556.015	31.341	13.133	194.341	22.7	1.513	4.68	61.442	126.56	57.645	53.832	8.927	0	0	0	10.519	45.21	0	39.188	125.249	4.486	73.412	27.728	0	8.81	67.972
NMP5	0	38.672	5.34	5.814	97.148	98.682	45.868	62.429	560.574	0	0	215.552	280.612	576.652	32.319	13.495	200.774	23.705	1.583	6.157	63.025	130.175	59.798	57.038	9.683	1.192	0	0	11.12	46.282	0	42.27	136.013	4.754	76.793	28.723	0	9.226	81.779
NMP7	0	38.561	7.999	5.806	100.668	117.268	47.586	69.507	559.381	0.571	0	229.19	297.232	585.85	32.48	13.49	204.379	26.172	1.632	6.017	68.143	138.662	61.942	62.541	9.023	0.583	0	0	12.712	47.244	0.536	44.781	164.908	4.813	82.403	29.286	0	7.963	135.57
NMD0	0	37.157	1.727	5.375	96.665	90.776	50.237	0	611.77	0	0	208.737	273.854	572.272	25.13	13.347	199.511	22.745	1.651	43.258	61.527	128.064	56.598	53.627	0	0.979	0.309	0	8.591	46.167	0	37.283	127.97	5.214	75.308	27.915	0	5.569	61.829
NMCB1	0	60.629	4.034	5.572	95.53	94.264	48.35	0	597.232	0	0.313	210.16	277.395	570.226	45.781	13.428	199.223	22.774	1.639	54.719	60.884	129.182	55.646	53.968	0	0.979	0.391	0.096	9.764	47.558	0	40.619	128.362	5.203	75.055	28.724	0	5.564	64.538
NMCB2	0	100.957	7.963	5.729	93.029	98.999	45.409	107.82	523.247	0	0	208.545	267.065	559.083	31.952	13.014	195.405	23.287	1.522	4.474	60.558	129.245	56.778	54.721	10.383	0.388	0.228	0	13.962	46.061	0	43.374	128.547	4.439	73.169	28.044	0	5.381	71.192
NMCB3	0	144.189	10.526	5.84	104.584	106.489	52.158	92.657	564.133	0.32	0	218.394	287.913	587.101	32.26	13.366	205.581	26.745	2.157	6.518	68.97	142.722	62.646	60.348	12.721	0	0	0.383	18.041	48.519	0.085	41.982	139.379	4.569	78.922	28.691	0	6.873	82.21
NMCB5	8.226	157.85	14.999	5.833	109.192	113.389	53.222	106.413	564.883	0	0.319	228.198	309.973	610.619	33.534	13.816	214.614	29.089	1.595	5.139	70.377	150.179	65.644	63.308	13.513	0	0	0.174	20.706	50.328	0	50.584	148.6	4.682	81.384	29.581	0	6.6	81.223
NMCB7	6.086	166.805	21.038	5.76	105.204	128.86	48.354	150.085	511.728	0	0	231.791	311.456	593.111	33.803	13.304	210.643	29.794	1.672	7.289	69.634	148.596	62.35	63.799	12.52	1.248	0	0	21.385	49.957	0	60.001	172.349	4.503	81.001	29.546	0	5.237	119.479
NMP1	0	38.2	2.381	5.491	96.622	91.282	49.983	28.879	609.671	0	0.389	210.855	282.223	574.367	32.52	13.483	200.905	23.001	1.676	53.553	62.333	129.868	57.248	54.44	9.295	1.008	0	0	9.434	46.392	0	38.665	129.439	5.276	75.489	28.256	0	7.018	62.238
QAP0	0	47.196	2.004	10.644	155.128	116.587	50.086	46.411	574.328	1.459	1.078	188.696	289.27	534.062	37.003	27.037	253.587	24.672	1.525	20.421	58.946	126.013	55.904	54.395	5.79	1.373	0	0	8.029	51.485	0	56.915	189.131	7.062	71.246	43.65	0	5.511	95.946
QACB1	0	78.153	3.84	10.396	149.667	113.784	47.787	54.957	549.399	0.955	1.097	183.537	283.276	517.286	35.828	26.128	245.129	23.957	1.435	14.301	57.056	123.42	53.626	52.751	6.071	1.366	0.466	0	9.08	50.201	0	56.095	182.445	6.827	68.834	42.344	0	5.874	92.811
QACB2	0	134.883	7.779	10.606	152.838	125.385	48.753	68.536	554.511	0.637	1.142	192.481	297.432	530.079	36.343	26.769	250.678	26.858	1.529	15.19	60.807	131.325	55.446	56.125	7.243	1.419	0.445	0.274	12.01	53.146	0.161	58.568	208.296	6.94	71.741	43.091	0	5.705	143.04
QACB3	0	156.084	11.326	10.199	149.05	123.214	48.157	77.797	524.599	0.143	1.076	184.413	287.438	510.085	34.449	24.928	240.886	26.931	1.435	15.265	59.488	129.832	55.389	55.675	7.481	1.269	0.371	0.077	14.694	50.585	0.083	55.842	192.051	6.539	69.2	40.867	0	5.328	118.46
QACB5	0	188.243	16.584	10.316	154.536	128.38	49.834	95.022	518.661	0.941	1.068	187.212	295.621	518.146	34.446	25.096	244.938	28.521	1.37	14.284	61.923	135.824	57.208	57.811	8.113	1.317	0	0.019	19.517	51.246	0.08	57.982	187.542	6.62	70.057	40.738	0	5.354	99.88
QACB7	0	222.432	24.03	11.59	174.968	149.326	54.963	117.578	555.467	1.122	1.242	211.945	335.586	583.4	38.424	27.933	275.273	32.716	1.55	20.101	71.621	155.971	64.043	66.742	9.3	1.494	0	0.444	23.212	58.141	0	69.745	214.752	7.338	79.727	46.004	0	4.721	113.945
QAP1	0	47.886	2.626	10.906	156.427	118.495	50.171	49.472	578.222	0.523	1.147	191.93	296.56	542.679	37.636	27.53	257.502	24.998	1.543	21.917	59.734	128.081	57.362	55.272	5.878	1.449	0.453	0.07	8.337	52.121	0.114	58.049	192.23	7.161	72.541	44.339	0	7.088	97.429
QAP2	0	49.095	3.163	11.235	159.902	121.174	50.557	51.986	588.316	0.643	1.212	195.908	304.152	553.972	38.458	28.094	262.908	25.555	1.557	18.172	61.142	130.818	57.958	56.578	6.099	1.424	0.363	0	8.624	53.738	0	59.607	196.766	7.354	74.22	45.29	0	7.374	99.556
QAP3	0	48.689	3.741	10.985	155.526	118.591	48.442	53.291	566.873	0.663	1.144	190.748	302.915	539.196	37.456	27.314	255.662	24.923	1.508	17.452	59.407	127.126	57.018	55.103	5.913	1.533	0.443	0	8.614	52.366	0	58.56	191.213	7.175	72.278	43.937	0	7.438	96.341
QAP5	0	48.222	4.531	11.178	157.616	120.771	47.851	60.61	568.59	0.433	1.196	194.332	305.584	547.41	38.019	27.766	260.518	25.285	1.543	16.894	60.712	129.954	57.022	56.164	5.917	1.471	0.092	0.136	8.653	53.129	0	60.424	194.59	7.335	73.613	44.836	0	7.26	97.651
QAP7	0	46.489	5.493	10.792	153.606	127.212	44.967	61.912	541.727	0	1.106	187.32	301.386	531.279	40.385	26.632	251.103	24.414	1.48	18.13	58.911	125.392	55.24	54.191	5.796	1.432	0	0.072	8.491	51.438	0	59.084	188.14	7.07	73.338	43.343	0	6.407	94.856
Amino Acid	PSER	TAU2	ASP2	HYP2	THR2	SER2	ASN2	GLU2	GLN2	SAR	AAD	PRO2	GLY2	ALA2	CIT2	ABU	VAL2	MET2	ALLISO	CYS2	ILE2	LEU2	TYR2	PHE2	BALA2	BABA	GBA	HCY	ETN	TRP2	HYL	ORN2	LYS2	1MHIS	HIS2	3MHIS	ANSP	CARSN	ARG2
NMP2	0	38.759	3.466	5.684	96.246	91.435	47.994	47.817	576.044	0	0.415	210.756	270.91	571.115	32.105	13.38	199.333	23.136	1.581	7.13	62.874	129.441	59.156	54.281	9.29	0.777	0	0	10.645	45.909	0	39.869	127.485	4.618	74.836	28.468	0	9.624	66.225
NMP3	0	37.385	3.929	5.575	93.917	88.912	45.467	51.482	557.267	0.963	0	206.432	266.994	556.015	31.341	13.133	194.341	22.7	1.513	4.68	61.442	126.56	57.645	53.832	8.927	0	0	0	10.519	45.21	0	39.188	125.249	4.486	73.412	27.728	0	8.81	67.972
NMP5	0	38.672	5.34	5.814	97.148	98.682	45.868	62.429	560.574	0	0	215.552	280.612	576.652	32.319	13.495	200.774	23.705	1.583	6.157	63.025	130.175	59.798	57.038	9.683	1.192	0	0	11.12	46.282	0	42.27	136.013	4.754	76.793	28.723	0	9.226	81.779
NMP7	0	38.561	7.999	5.806	100.668	117.268	47.586	69.507	559.381	0.571	0	229.19	297.232	585.85	32.48	13.49	204.379	26.172	1.632	6.017	68.143	138.662	61.942	62.541	9.023	0.583	0	0	12.712	47.244	0.536	44.781	164.908	4.813	82.403	29.286	0	7.963	135.57
NMD0	0	37.157	1.727	5.375	96.665	90.776	50.237	0	611.77	0	0	208.737	273.854	572.272	25.13	13.347	199.511	22.745	1.651	43.258	61.527	128.064	56.598	53.627	0	0.979	0.309	0	8.591	46.167	0	37.283	127.97	5.214	75.308	27.915	0	5.569	61.829
NMCB1	0	60.629	4.034	5.572	95.53	94.264	48.35	0	597.232	0	0.313	210.16	277.395	570.226	45.781	13.428	199.223	22.774	1.639	54.719	60.884	129.182	55.646	53.968	0	0.979	0.391	0.096	9.764	47.558	0	40.619	128.362	5.203	75.055	28.724	0	5.564	64.538
NMCB2	0	100.957	7.963	5.729	93.029	98.999	45.409	107.82	523.247	0	0	208.545	267.065	559.083	31.952	13.014	195.405	23.287	1.522	4.474	60.558	129.245	56.778	54.721	10.383	0.388	0.228	0	13.962	46.061	0	43.374	128.547	4.439	73.169	28.044	0	5.381	71.192
NMCB3	0	144.189	10.526	5.84	104.584	106.489	52.158	92.657	564.133	0.32	0	218.394	287.913	587.101	32.26	13.366	205.581	26.745	2.157	6.518	68.97	142.722	62.646	60.348	12.721	0	0	0.383	18.041	48.519	0.085	41.982	139.379	4.569	78.922	28.691	0	6.873	82.21
NMCB5	8.226	157.85	14.999	5.833	109.192	113.389	53.222	106.413	564.883	0	0.319	228.198	309.973	610.619	33.534	13.816	214.614	29.089	1.595	5.139	70.377	150.179	65.644	63.308	13.513	0	0	0.174	20.706	50.328	0	50.584	148.6	4.682	81.384	29.581	0	6.6	81.223
NMCB7	6.086	166.805	21.038	5.76	105.204	128.86	48.354	150.085	511.728	0	0	231.791	311.456	593.111	33.803	13.304	210.643	29.794	1.672	7.289	69.634	148.596	62.35	63.799	12.52	1.248	0	0	21.385	49.957	0	60.001	172.349	4.503	81.001	29.546	0	5.237	119.479
NMP1	0	38.2	2.381	5.491	96.622	91.282	49.983	28.879	609.671	0	0.389	210.855	282.223	574.367	32.52	13.483	200.905	23.001	1.676	53.553	62.333	129.868	57.248	54.44	9.295	1.008	0	0	9.434	46.392	0	38.665	129.439	5.276	75.489	28.256	0	7.018	62.238
QAP0	0	47.196	2.004	10.644	155.128	116.587	50.086	46.411	574.328	1.459	1.078	188.696	289.27	534.062	37.003	27.037	253.587	24.672	1.525	20.421	58.946	126.013	55.904	54.395	5.79	1.373	0	0	8.029	51.485	0	56.915	189.131	7.062	71.246	43.65	0	5.511	95.946
QACB1	0	78.153	3.84	10.396	149.667	113.784	47.787	54.957	549.399	0.955	1.097	183.537	283.276	517.286	35.828	26.128	245.129	23.957	1.435	14.301	57.056	123.42	53.626	52.751	6.071	1.366	0.466	0	9.08	50.201	0	56.095	182.445	6.827	68.834	42.344	0	5.874	92.811
QACB2	0	134.883	7.779	10.606	152.838	125.385	48.753	68.536	554.511	0.637	1.142	192.481	297.432	530.079	36.343	26.769	250.678	26.858	1.529	15.19	60.807	131.325	55.446	56.125	7.243	1.419	0.445	0.274	12.01	53.146	0.161	58.568	208.296	6.94	71.741	43.091	0	5.705	143.04
QACB3	0	156.084	11.326	10.199	149.05	123.214	48.157	77.797	524.599	0.143	1.076	184.413	287.438	510.085	34.449	24.928	240.886	26.931	1.435	15.265	59.488	129.832	55.389	55.675	7.481	1.269	0.371	0.077	14.694	50.585	0.083	55.842	192.051	6.539	69.2	40.867	0	5.328	118.46
QACB5	0	188.243	16.584	10.316	154.536	128.38	49.834	95.022	518.661	0.941	1.068	187.212	295.621	518.146	34.446	25.096	244.938	28.521	1.37	14.284	61.923	135.824	57.208	57.811	8.113	1.317	0	0.019	19.517	51.246	0.08	57.982	187.542	6.62	70.057	40.738	0	5.354	99.88
QACB7	0	222.432	24.03	11.59	174.968	149.326	54.963	117.578	555.467	1.122	1.242	211.945	335.586	583.4	38.424	27.933	275.273	32.716	1.55	20.101	71.621	155.971	64.043	66.742	9.3	1.494	0	0.444	23.212	58.141	0	69.745	214.752	7.338	79.727	46.004	0	4.721	113.945
QAP1	0	47.886	2.626	10.906	156.427	118.495	50.171	49.472	578.222	0.523	1.147	191.93	296.56	542.679	37.636	27.53	257.502	24.998	1.543	21.917	59.734	128.081	57.362	55.272	5.878	1.449	0.453	0.07	8.337	52.121	0.114	58.049	192.23	7.161	72.541	44.339	0	7.088	97.429
QAP2	0	49.095	3.163	11.235	159.902	121.174	50.557	51.986	588.316	0.643	1.212	195.908	304.152	553.972	38.458	28.094	262.908	25.555	1.557	18.172	61.142	130.818	57.958	56.578	6.099	1.424	0.363	0	8.624	53.738	0	59.607	196.766	7.354	74.22	45.29	0	7.374	99.556
QAP3	0	48.689	3.741	10.985	155.526	118.591	48.442	53.291	566.873	0.663	1.144	190.748	302.915	539.196	37.456	27.314	255.662	24.923	1.508	17.452	59.407	127.126	57.018	55.103	5.913	1.533	0.443	0	8.614	52.366	0	58.56	191.213	7.175	72.278	43.937	0	7.438	96.341
QAP5	0	48.222	4.531	11.178	157.616	120.771	47.851	60.61	568.59	0.433	1.196	194.332	305.584	547.41	38.019	27.766	260.518	25.285	1.543	16.894	60.712	129.954	57.022	56.164	5.917	1.471	0.092	0.136	8.653	53.129	0	60.424	194.59	7.335	73.613	44.836	0	7.26	97.651
QAP7	0	46.489	5.493	10.792	153.606	127.212	44.967	61.912	541.727	0	1.106	187.32	301.386	531.279	40.385	26.632	251.103	24.414	1.48	18.13	58.911	125.392	55.24	54.191	5.796	1.432	0	0.072	8.491	51.438	0	59.084	188.14	7.07	73.338	43.343	0	6.407	94.856
Amino Acid	PSER	TAU2	ASP2	HYP2	THR2	SER2	ASN2	GLU2	GLN2	SAR	AAD	PRO2	GLY2	ALA2	CIT2	ABU	VAL2	MET2	ALLISO	CYS2	ILE2	LEU2	TYR2	PHE2	BALA2	BABA	GBA	HCY	ETN	TRP2	HYL	ORN2	LYS2	1MHIS	HIS2	3MHIS	ANSP	CARSN	ARG2
NMP2	0	38.759	3.466	5.684	96.246	91.435	47.994	47.817	576.044	0	0.415	210.756	270.91	571.115	32.105	13.38	199.333	23.136	1.581	7.13	62.874	129.441	59.156	54.281	9.29	0.777	0	0	10.645	45.909	0	39.869	127.485	4.618	74.836	28.468	0	9.624	66.225
NMP3	0	37.385	3.929	5.575	93.917	88.912	45.467	51.482	557.267	0.963	0	206.432	266.994	556.015	31.341	13.133	194.341	22.7	1.513	4.68	61.442	126.56	57.645	53.832	8.927	0	0	0	10.519	45.21	0	39.188	125.249	4.486	73.412	27.728	0	8.81	67.972
NMP5	0	38.672	5.34	5.814	97.148	98.682	45.868	62.429	560.574	0	0	215.552	280.612	576.652	32.319	13.495	200.774	23.705	1.583	6.157	63.025	130.175	59.798	57.038	9.683	1.192	0	0	11.12	46.282	0	42.27	136.013	4.754	76.793	28.723	0	9.226	81.779
NMP7	0	38.561	7.999	5.806	100.668	117.268	47.586	69.507	559.381	0.571	0	229.19	297.232	585.85	32.48	13.49	204.379	26.172	1.632	6.017	68.143	138.662	61.942	62.541	9.023	0.583	0	0	12.712	47.244	0.536	44.781	164.908	4.813	82.403	29.286	0	7.963	135.57
NMD0	0	37.157	1.727	5.375	96.665	90.776	50.237	0	611.77	0	0	208.737	273.854	572.272	25.13	13.347	199.511	22.745	1.651	43.258	61.527	128.064	56.598	53.627	0	0.979	0.309	0	8.591	46.167	0	37.283	127.97	5.214	75.308	27.915	0	5.569	61.829
NMCB1	0	60.629	4.034	5.572	95.53	94.264	48.35	0	597.232	0	0.313	210.16	277.395	570.226	45.781	13.428	199.223	22.774	1.639	54.719	60.884	129.182	55.646	53.968	0	0.979	0.391	0.096	9.764	47.558	0	40.619	128.362	5.203	75.055	28.724	0	5.564	64.538
NMCB2	0	100.957	7.963	5.729	93.029	98.999	45.409	107.82	523.247	0	0	208.545	267.065	559.083	31.952	13.014	195.405	23.287	1.522	4.474	60.558	129.245	56.778	54.721	10.383	0.388	0.228	0	13.962	46.061	0	43.374	128.547	4.439	73.169	28.044	0	5.381	71.192
NMCB3	0	144.189	10.526	5.84	104.584	106.489	52.158	92.657	564.133	0.32	0	218.394	287.913	587.101	32.26	13.366	205.581	26.745	2.157	6.518	68.97	142.722	62.646	60.348	12.721	0	0	0.383	18.041	48.519	0.085	41.982	139.379	4.569	78.922	28.691	0	6.873	82.21
NMCB5	8.226	157.85	14.999	5.833	109.192	113.389	53.222	106.413	564.883	0	0.319	228.198	309.973	610.619	33.534	13.816	214.614	29.089	1.595	5.139	70.377	150.179	65.644	63.308	13.513	0	0	0.174	20.706	50.328	0	50.584	148.6	4.682	81.384	29.581	0	6.6	81.223
NMCB7	6.086	166.805	21.038	5.76	105.204	128.86	48.354	150.085	511.728	0	0	231.791	311.456	593.111	33.803	13.304	210.643	29.794	1.672	7.289	69.634	148.596	62.35	63.799	12.52	1.248	0	0	21.385	49.957	0	60.001	172.349	4.503	81.001	29.546	0	5.237	119.479
NMP1	0	38.2	2.381	5.491	96.622	91.282	49.983	28.879	609.671	0	0.389	210.855	282.223	574.367	32.52	13.483	200.905	23.001	1.676	53.553	62.333	129.868	57.248	54.44	9.295	1.008	0	0	9.434	46.392	0	38.665	129.439	5.276	75.489	28.256	0	7.018	62.238
QAP0	0	47.196	2.004	10.644	155.128	116.587	50.086	46.411	574.328	1.459	1.078	188.696	289.27	534.062	37.003	27.037	253.587	24.672	1.525	20.421	58.946	126.013	55.904	54.395	5.79	1.373	0	0	8.029	51.485	0	56.915	189.131	7.062	71.246	43.65	0	5.511	95.946
QACB1	0	78.153	3.84	10.396	149.667	113.784	47.787	54.957	549.399	0.955	1.097	183.537	283.276	517.286	35.828	26.128	245.129	23.957	1.435	14.301	57.056	123.42	53.626	52.751	6.071	1.366	0.466	0	9.08	50.201	0	56.095	182.445	6.827	68.834	42.344	0	5.874	92.811
QACB2	0	134.883	7.779	10.606	152.838	125.385	48.753	68.536	554.511	0.637	1.142	192.481	297.432	530.079	36.343	26.769	250.678	26.858	1.529	15.19	60.807	131.325	55.446	56.125	7.243	1.419	0.445	0.274	12.01	53.146	0.161	58.568	208.296	6.94	71.741	43.091	0	5.705	143.04
QACB3	0	156.084	11.326	10.199	149.05	123.214	48.157	77.797	524.599	0.143	1.076	184.413	287.438	510.085	34.449	24.928	240.886	26.931	1.435	15.265	59.488	129.832	55.389	55.675	7.481	1.269	0.371	0.077	14.694	50.585	0.083	55.842	192.051	6.539	69.2	40.867	0	5.328	118.46
QACB5	0	188.243	16.584	10.316	154.536	128.38	49.834	95.022	518.661	0.941	1.068	187.212	295.621	518.146	34.446	25.096	244.938	28.521	1.37	14.284	61.923	135.824	57.208	57.811	8.113	1.317	0	0.019	19.517	51.246	0.08	57.982	187.542	6.62	70.057	40.738	0	5.354	99.88
QACB7	0	222.432	24.03	11.59	174.968	149.326	54.963	117.578	555.467	1.122	1.242	211.945	335.586	583.4	38.424	27.933	275.273	32.716	1.55	20.101	71.621	155.971	64.043	66.742	9.3	1.494	0	0.444	23.212	58.141	0	69.745	214.752	7.338	79.727	46.004	0	4.721	113.945
QAP1	0	47.886	2.626	10.906	156.427	118.495	50.171	49.472	578.222	0.523	1.147	191.93	296.56	542.679	37.636	27.53	257.502	24.998	1.543	21.917	59.734	128.081	57.362	55.272	5.878	1.449	0.453	0.07	8.337	52.121	0.114	58.049	192.23	7.161	72.541	44.339	0	7.088	97.429
QAP2	0	49.095	3.163	11.235	159.902	121.174	50.557	51.986	588.316	0.643	1.212	195.908	304.152	553.972	38.458	28.094	262.908	25.555	1.557	18.172	61.142	130.818	57.958	56.578	6.099	1.424	0.363	0	8.624	53.738	0	59.607	196.766	7.354	74.22	45.29	0	7.374	99.556
QAP3	0	48.689	3.741	10.985	155.526	118.591	48.442	53.291	566.873	0.663	1.144	190.748	302.915	539.196	37.456	27.314	255.662	24.923	1.508	17.452	59.407	127.126	57.018	55.103	5.913	1.533	0.443	0	8.614	52.366	0	58.56	191.213	7.175	72.278	43.937	0	7.438	96.341
QAP5	0	48.222	4.531	11.178	157.616	120.771	47.851	60.61	568.59	0.433	1.196	194.332	305.584	547.41	38.019	27.766	260.518	25.285	1.543	16.894	60.712	129.954	57.022	56.164	5.917	1.471	0.092	0.136	8.653	53.129	0	60.424	194.59	7.335	73.613	44.836	0	7.26	97.651
QAP7	0	46.489	5.493	10.792	153.606	127.212	44.967	61.912	541.727	0	1.106	187.32	301.386	531.279	40.385	26.632	251.103	24.414	1.48	18.13	58.911	125.392	55.24	54.191	5.796	1.432	0	0.072	8.491	51.438	0	59.084	188.14	7.07	73.338	43.343	0	6.407	94.856
Amino Acid	PSER	TAU2	ASP2	HYP2	THR2	SER2	ASN2	GLU2	GLN2	SAR	AAD	PRO2	GLY2	ALA2	CIT2	ABU	VAL2	MET2	ALLISO	CYS2	ILE2	LEU2	TYR2	PHE2	BALA2	BABA	GBA	HCY	ETN	TRP2	HYL	ORN2	LYS2	1MHIS	HIS2	3MHIS	ANSP	CARSN	ARG2
NMP2	0	38.759	3.466	5.684	96.246	91.435	47.994	47.817	576.044	0	0.415	210.756	270.91	571.115	32.105	13.38	199.333	23.136	1.581	7.13	62.874	129.441	59.156	54.281	9.29	0.777	0	0	10.645	45.909	0	39.869	127.485	4.618	74.836	28.468	0	9.624	66.225
NMP3	0	37.385	3.929	5.575	93.917	88.912	45.467	51.482	557.267	0.963	0	206.432	266.994	556.015	31.341	13.133	194.341	22.7	1.513	4.68	61.442	126.56	57.645	53.832	8.927	0	0	0	10.519	45.21	0	39.188	125.249	4.486	73.412	27.728	0	8.81	67.972
NMP5	0	38.672	5.34	5.814	97.148	98.682	45.868	62.429	560.574	0	0	215.552	280.612	576.652	32.319	13.495	200.774	23.705	1.583	6.157	63.025	130.175	59.798	57.038	9.683	1.192	0	0	11.12	46.282	0	42.27	136.013	4.754	76.793	28.723	0	9.226	81.779
NMP7	0	38.561	7.999	5.806	100.668	117.268	47.586	69.507	559.381	0.571	0	229.19	297.232	585.85	32.48	13.49	204.379	26.172	1.632	6.017	68.143	138.662	61.942	62.541	9.023	0.583	0	0	12.712	47.244	0.536	44.781	164.908	4.813	82.403	29.286	0	7.963	135.57
NMD0	0	37.157	1.727	5.375	96.665	90.776	50.237	0	611.77	0	0	208.737	273.854	572.272	25.13	13.347	199.511	22.745	1.651	43.258	61.527	128.064	56.598	53.627	0	0.979	0.309	0	8.591	46.167	0	37.283	127.97	5.214	75.308	27.915	0	5.569	61.829
NMCB1	0	60.629	4.034	5.572	95.53	94.264	48.35	0	597.232	0	0.313	210.16	277.395	570.226	45.781	13.428	199.223	22.774	1.639	54.719	60.884	129.182	55.646	53.968	0	0.979	0.391	0.096	9.764	47.558	0	40.619	128.362	5.203	75.055	28.724	0	5.564	64.538
NMCB2	0	100.957	7.963	5.729	93.029	98.999	45.409	107.82	523.247	0	0	208.545	267.065	559.083	31.952	13.014	195.405	23.287	1.522	4.474	60.558	129.245	56.778	54.721	10.383	0.388	0.228	0	13.962	46.061	0	43.374	128.547	4.439	73.169	28.044	0	5.381	71.192
NMCB3	0	144.189	10.526	5.84	104.584	106.489	52.158	92.657	564.133	0.32	0	218.394	287.913	587.101	32.26	13.366	205.581	26.745	2.157	6.518	68.97	142.722	62.646	60.348	12.721	0	0	0.383	18.041	48.519	0.085	41.982	139.379	4.569	78.922	28.691	0	6.873	82.21
NMCB5	8.226	157.85	14.999	5.833	109.192	113.389	53.222	106.413	564.883	0	0.319	228.198	309.973	610.619	33.534	13.816	214.614	29.089	1.595	5.139	70.377	150.179	65.644	63.308	13.513	0	0	0.174	20.706	50.328	0	50.584	148.6	4.682	81.384	29.581	0	6.6	81.223
NMCB7	6.086	166.805	21.038	5.76	105.204	128.86	48.354	150.085	511.728	0	0	231.791	311.456	593.111	33.803	13.304	210.643	29.794	1.672	7.289	69.634	148.596	62.35	63.799	12.52	1.248	0	0	21.385	49.957	0	60.001	172.349	4.503	81.001	29.546	0	5.237	119.479
NMP1	0	38.2	2.381	5.491	96.622	91.282	49.983	28.879	609.671	0	0.389	210.855	282.223	574.367	32.52	13.483	200.905	23.001	1.676	53.553	62.333	129.868	57.248	54.44	9.295	1.008	0	0	9.434	46.392	0	38.665	129.439	5.276	75.489	28.256	0	7.018	62.238
QAP0	0	47.196	2.004	10.644	155.128	116.587	50.086	46.411	574.328	1.459	1.078	188.696	289.27	534.062	37.003	27.037	253.587	24.672	1.525	20.421	58.946	126.013	55.904	54.395	5.79	1.373	0	0	8.029	51.485	0	56.915	189.131	7.062	71.246	43.65	0	5.511	95.946
QACB1	0	78.153	3.84	10.396	149.667	113.784	47.787	54.957	549.399	0.955	1.097	183.537	283.276	517.286	35.828	26.128	245.129	23.957	1.435	14.301	57.056	123.42	53.626	52.751	6.071	1.366	0.466	0	9.08	50.201	0	56.095	182.445	6.827	68.834	42.344	0	5.874	92.811
QACB2	0	134.883	7.779	10.606	152.838	125.385	48.753	68.536	554.511	0.637	1.142	192.481	297.432	530.079	36.343	26.769	250.678	26.858	1.529	15.19	60.807	131.325	55.446	56.125	7.243	1.419	0.445	0.274	12.01	53.146	0.161	58.568	208.296	6.94	71.741	43.091	0	5.705	143.04
QACB3	0	156.084	11.326	10.199	149.05	123.214	48.157	77.797	524.599	0.143	1.076	184.413	287.438	510.085	34.449	24.928	240.886	26.931	1.435	15.265	59.488	129.832	55.389	55.675	7.481	1.269	0.371	0.077	14.694	50.585	0.083	55.842	192.051	6.539	69.2	40.867	0	5.328	118.46
QACB5	0	188.243	16.584	10.316	154.536	128.38	49.834	95.022	518.661	0.941	1.068	187.212	295.621	518.146	34.446	25.096	244.938	28.521	1.37	14.284	61.923	135.824	57.208	57.811	8.113	1.317	0	0.019	19.517	51.246	0.08	57.982	187.542	6.62	70.057	40.738	0	5.354	99.88
QACB7	0	222.432	24.03	11.59	174.968	149.326	54.963	117.578	555.467	1.122	1.242	211.945	335.586	583.4	38.424	27.933	275.273	32.716	1.55	20.101	71.621	155.971	64.043	66.742	9.3	1.494	0	0.444	23.212	58.141	0	69.745	214.752	7.338	79.727	46.004	0	4.721	113.945
QAP1	0	47.886	2.626	10.906	156.427	118.495	50.171	49.472	578.222	0.523	1.147	191.93	296.56	542.679	37.636	27.53	257.502	24.998	1.543	21.917	59.734	128.081	57.362	55.272	5.878	1.449	0.453	0.07	8.337	52.121	0.114	58.049	192.23	7.161	72.541	44.339	0	7.088	97.429
QAP2	0	49.095	3.163	11.235	159.902	121.174	50.557	51.986	588.316	0.643	1.212	195.908	304.152	553.972	38.458	28.094	262.908	25.555	1.557	18.172	61.142	130.818	57.958	56.578	6.099	1.424	0.363	0	8.624	53.738	0	59.607	196.766	7.354	74.22	45.29	0	7.374	99.556
QAP3	0	48.689	3.741	10.985	155.526	118.591	48.442	53.291	566.873	0.663	1.144	190.748	302.915	539.196	37.456	27.314	255.662	24.923	1.508	17.452	59.407	127.126	57.018	55.103	5.913	1.533	0.443	0	8.614	52.366	0	58.56	191.213	7.175	72.278	43.937	0	7.438	96.341
QAP5	0	48.222	4.531	11.178	157.616	120.771	47.851	60.61	568.59	0.433	1.196	194.332	305.584	547.41	38.019	27.766	260.518	25.285	1.543	16.894	60.712	129.954	57.022	56.164	5.917	1.471	0.092	0.136	8.653	53.129	0	60.424	194.59	7.335	73.613	44.836	0	7.26	97.651
QAP7	0	46.489	5.493	10.792	153.606	127.212	44.967	61.912	541.727	0	1.106	187.32	301.386	531.279	40.385	26.632	251.103	24.414	1.48	18.13	58.911	125.392	55.24	54.191	5.796	1.432	0	0.072	8.491	51.438	0	59.084	188.14	7.07	73.338	43.343	0	6.407	94.856
Amino Acid	PSER	TAU2	ASP2	HYP2	THR2	SER2	ASN2	GLU2	GLN2	SAR	AAD	PRO2	GLY2	ALA2	CIT2	ABU	VAL2	MET2	ALLISO	CYS2	ILE2	LEU2	TYR2	PHE2	BALA2	BABA	GBA	HCY	ETN	TRP2	HYL	ORN2	LYS2	1MHIS	HIS2	3MHIS	ANSP	CARSN	ARG2
NMP2	0	38.759	3.466	5.684	96.246	91.435	47.994	47.817	576.044	0	0.415	210.756	270.91	571.115	32.105	13.38	199.333	23.136	1.581	7.13	62.874	129.441	59.156	54.281	9.29	0.777	0	0	10.645	45.909	0	39.869	127.485	4.618	74.836	28.468	0	9.624	66.225
NMP3	0	37.385	3.929	5.575	93.917	88.912	45.467	51.482	557.267	0.963	0	206.432	266.994	556.015	31.341	13.133	194.341	22.7	1.513	4.68	61.442	126.56	57.645	53.832	8.927	0	0	0	10.519	45.21	0	39.188	125.249	4.486	73.412	27.728	0	8.81	67.972
NMP5	0	38.672	5.34	5.814	97.148	98.682	45.868	62.429	560.574	0	0	215.552	280.612	576.652	32.319	13.495	200.774	23.705	1.583	6.157	63.025	130.175	59.798	57.038	9.683	1.192	0	0	11.12	46.282	0	42.27	136.013	4.754	76.793	28.723	0	9.226	81.779
NMP7	0	38.561	7.999	5.806	100.668	117.268	47.586	69.507	559.381	0.571	0	229.19	297.232	585.85	32.48	13.49	204.379	26.172	1.632	6.017	68.143	138.662	61.942	62.541	9.023	0.583	0	0	12.712	47.244	0.536	44.781	164.908	4.813	82.403	29.286	0	7.963	135.57
NMD0	0	37.157	1.727	5.375	96.665	90.776	50.237	0	611.77	0	0	208.737	273.854	572.272	25.13	13.347	199.511	22.745	1.651	43.258	61.527	128.064	56.598	53.627	0	0.979	0.309	0	8.591	46.167	0	37.283	127.97	5.214	75.308	27.915	0	5.569	61.829
NMCB1	0	60.629	4.034	5.572	95.53	94.264	48.35	0	597.232	0	0.313	210.16	277.395	570.226	45.781	13.428	199.223	22.774	1.639	54.719	60.884	129.182	55.646	53.968	0	0.979	0.391	0.096	9.764	47.558	0	40.619	128.362	5.203	75.055	28.724	0	5.564	64.538
NMCB2	0	100.957	7.963	5.729	93.029	98.999	45.409	107.82	523.247	0	0	208.545	267.065	559.083	31.952	13.014	195.405	23.287	1.522	4.474	60.558	129.245	56.778	54.721	10.383	0.388	0.228	0	13.962	46.061	0	43.374	128.547	4.439	73.169	28.044	0	5.381	71.192
NMCB3	0	144.189	10.526	5.84	104.584	106.489	52.158	92.657	564.133	0.32	0	218.394	287.913	587.101	32.26	13.366	205.581	26.745	2.157	6.518	68.97	142.722	62.646	60.348	12.721	0	0	0.383	18.041	48.519	0.085	41.982	139.379	4.569	78.922	28.691	0	6.873	82.21
NMCB5	8.226	157.85	14.999	5.833	109.192	113.389	53.222	106.413	564.883	0	0.319	228.198	309.973	610.619	33.534	13.816	214.614	29.089	1.595	5.139	70.377	150.179	65.644	63.308	13.513	0	0	0.174	20.706	50.328	0	50.584	148.6	4.682	81.384	29.581	0	6.6	81.223
NMCB7	6.086	166.805	21.038	5.76	105.204	128.86	48.354	150.085	511.728	0	0	231.791	311.456	593.111	33.803	13.304	210.643	29.794	1.672	7.289	69.634	148.596	62.35	63.799	12.52	1.248	0	0	21.385	49.957	0	60.001	172.349	4.503	81.001	29.546	0	5.237	119.479
NMP1	0	38.2	2.381	5.491	96.622	91.282	49.983	28.879	609.671	0	0.389	210.855	282.223	574.367	32.52	13.483	200.905	23.001	1.676	53.553	62.333	129.868	57.248	54.44	9.295	1.008	0	0	9.434	46.392	0	38.665	129.439	5.276	75.489	28.256	0	7.018	62.238
QAP0	0	47.196	2.004	10.644	155.128	116.587	50.086	46.411	574.328	1.459	1.078	188.696	289.27	534.062	37.003	27.037	253.587	24.672	1.525	20.421	58.946	126.013	55.904	54.395	5.79	1.373	0	0	8.029	51.485	0	56.915	189.131	7.062	71.246	43.65	0	5.511	95.946
QACB1	0	78.153	3.84	10.396	149.667	113.784	47.787	54.957	549.399	0.955	1.097	183.537	283.276	517.286	35.828	26.128	245.129	23.957	1.435	14.301	57.056	123.42	53.626	52.751	6.071	1.366	0.466	0	9.08	50.201	0	56.095	182.445	6.827	68.834	42.344	0	5.874	92.811
QACB2	0	134.883	7.779	10.606	152.838	125.385	48.753	68.536	554.511	0.637	1.142	192.481	297.432	530.079	36.343	26.769	250.678	26.858	1.529	15.19	60.807	131.325	55.446	56.125	7.243	1.419	0.445	0.274	12.01	53.146	0.161	58.568	208.296	6.94	71.741	43.091	0	5.705	143.04
QACB3	0	156.084	11.326	10.199	149.05	123.214	48.157	77.797	524.599	0.143	1.076	184.413	287.438	510.085	34.449	24.928	240.886	26.931	1.435	15.265	59.488	129.832	55.389	55.675	7.481	1.269	0.371	0.077	14.694	50.585	0.083	55.842	192.051	6.539	69.2	40.867	0	5.328	118.46
QACB5	0	188.243	16.584	10.316	154.536	128.38	49.834	95.022	518.661	0.941	1.068	187.212	295.621	518.146	34.446	25.096	244.938	28.521	1.37	14.284	61.923	135.824	57.208	57.811	8.113	1.317	0	0.019	19.517	51.246	0.08	57.982	187.542	6.62	70.057	40.738	0	5.354	99.88
QACB7	0	222.432	24.03	11.59	174.968	149.326	54.963	117.578	555.467	1.122	1.242	211.945	335.586	583.4	38.424	27.933	275.273	32.716	1.55	20.101	71.621	155.971	64.043	66.742	9.3	1.494	0	0.444	23.212	58.141	0	69.745	214.752	7.338	79.727	46.004	0	4.721	113.945
QAP1	0	47.886	2.626	10.906	156.427	118.495	50.171	49.472	578.222	0.523	1.147	191.93	296.56	542.679	37.636	27.53	257.502	24.998	1.543	21.917	59.734	128.081	57.362	55.272	5.878	1.449	0.453	0.07	8.337	52.121	0.114	58.049	192.23	7.161	72.541	44.339	0	7.088	97.429
QAP2	0	49.095	3.163	11.235	159.902	121.174	50.557	51.986	588.316	0.643	1.212	195.908	304.152	553.972	38.458	28.094	262.908	25.555	1.557	18.172	61.142	130.818	57.958	56.578	6.099	1.424	0.363	0	8.624	53.738	0	59.607	196.766	7.354	74.22	45.29	0	7.374	99.556
QAP3	0	48.689	3.741	10.985	155.526	118.591	48.442	53.291	566.873	0.663	1.144	190.748	302.915	539.196	37.456	27.314	255.662	24.923	1.508	17.452	59.407	127.126	57.018	55.103	5.913	1.533	0.443	0	8.614	52.366	0	58.56	191.213	7.175	72.278	43.937	0	7.438	96.341
QAP5	0	48.222	4.531	11.178	157.616	120.771	47.851	60.61	568.59	0.433	1.196	194.332	305.584	547.41	38.019	27.766	260.518	25.285	1.543	16.894	60.712	129.954	57.022	56.164	5.917	1.471	0.092	0.136	8.653	53.129	0	60.424	194.59	7.335	73.613	44.836	0	7.26	97.651
QAP7	0	46.489	5.493	10.792	153.606	127.212	44.967	61.912	541.727	0	1.106	187.32	301.386	531.279	40.385	26.632	251.103	24.414	1.48	18.13	58.911	125.392	55.24	54.191	5.796	1.432	0	0.072	8.491	51.438	0	59.084	188.14	7.07	73.338	43.343	0	6.407	94.856
Amino Acid	PSER	TAU2	ASP2	HYP2	THR2	SER2	ASN2	GLU2	GLN2	SAR	AAD	PRO2	GLY2	ALA2	CIT2	ABU	VAL2	MET2	ALLISO	CYS2	ILE2	LEU2	TYR2	PHE2	BALA2	BABA	GBA	HCY	ETN	TRP2	HYL	ORN2	LYS2	1MHIS	HIS2	3MHIS	ANSP	CARSN	ARG2
NMP2	0	38.759	3.466	5.684	96.246	91.435	47.994	47.817	576.044	0	0.415	210.756	270.91	571.115	32.105	13.38	199.333	23.136	1.581	7.13	62.874	129.441	59.156	54.281	9.29	0.777	0	0	10.645	45.909	0	39.869	127.485	4.618	74.836	28.468	0	9.624	66.225
NMP3	0	37.385	3.929	5.575	93.917	88.912	45.467	51.482	557.267	0.963	0	206.432	266.994	556.015	31.341	13.133	194.341	22.7	1.513	4.68	61.442	126.56	57.645	53.832	8.927	0	0	0	10.519	45.21	0	39.188	125.249	4.486	73.412	27.728	0	8.81	67.972
NMP5	0	38.672	5.34	5.814	97.148	98.682	45.868	62.429	560.574	0	0	215.552	280.612	576.652	32.319	13.495	200.774	23.705	1.583	6.157	63.025	130.175	59.798	57.038	9.683	1.192	0	0	11.12	46.282	0	42.27	136.013	4.754	76.793	28.723	0	9.226	81.779
NMP7	0	38.561	7.999	5.806	100.668	117.268	47.586	69.507	559.381	0.571	0	229.19	297.232	585.85	32.48	13.49	204.379	26.172	1.632	6.017	68.143	138.662	61.942	62.541	9.023	0.583	0	0	12.712	47.244	0.536	44.781	164.908	4.813	82.403	29.286	0	7.963	135.57
NMD0	0	37.157	1.727	5.375	96.665	90.776	50.237	0	611.77	0	0	208.737	273.854	572.272	25.13	13.347	199.511	22.745	1.651	43.258	61.527	128.064	56.598	53.627	0	0.979	0.309	0	8.591	46.167	0	37.283	127.97	5.214	75.308	27.915	0	5.569	61.829
NMCB1	0	60.629	4.034	5.572	95.53	94.264	48.35	0	597.232	0	0.313	210.16	277.395	570.226	45.781	13.428	199.223	22.774	1.639	54.719	60.884	129.182	55.646	53.968	0	0.979	0.391	0.096	9.764	47.558	0	40.619	128.362	5.203	75.055	28.724	0	5.564	64.538
NMCB2	0	100.957	7.963	5.729	93.029	98.999	45.409	107.82	523.247	0	0	208.545	267.065	559.083	31.952	13.014	195.405	23.287	1.522	4.474	60.558	129.245	56.778	54.721	10.383	0.388	0.228	0	13.962	46.061	0	43.374	128.547	4.439	73.169	28.044	0	5.381	71.192
NMCB3	0	144.189	10.526	5.84	104.584	106.489	52.158	92.657	564.133	0.32	0	218.394	287.913	587.101	32.26	13.366	205.581	26.745	2.157	6.518	68.97	142.722	62.646	60.348	12.721	0	0	0.383	18.041	48.519	0.085	41.982	139.379	4.569	78.922	28.691	0	6.873	82.21
NMCB5	8.226	157.85	14.999	5.833	109.192	113.389	53.222	106.413	564.883	0	0.319	228.198	309.973	610.619	33.534	13.816	214.614	29.089	1.595	5.139	70.377	150.179	65.644	63.308	13.513	0	0	0.174	20.706	50.328	0	50.584	148.6	4.682	81.384	29.581	0	6.6	81.223
NMCB7	6.086	166.805	21.038	5.76	105.204	128.86	48.354	150.085	511.728	0	0	231.791	311.456	593.111	33.803	13.304	210.643	29.794	1.672	7.289	69.634	148.596	62.35	63.799	12.52	1.248	0	0	21.385	49.957	0	60.001	172.349	4.503	81.001	29.546	0	5.237	119.479
NMP1	0	38.2	2.381	5.491	96.622	91.282	49.983	28.879	609.671	0	0.389	210.855	282.223	574.367	32.52	13.483	200.905	23.001	1.676	53.553	62.333	129.868	57.248	54.44	9.295	1.008	0	0	9.434	46.392	0	38.665	129.439	5.276	75.489	28.256	0	7.018	62.238
QAP0	0	47.196	2.004	10.644	155.128	116.587	50.086	46.411	574.328	1.459	1.078	188.696	289.27	534.062	37.003	27.037	253.587	24.672	1.525	20.421	58.946	126.013	55.904	54.395	5.79	1.373	0	0	8.029	51.485	0	56.915	189.131	7.062	71.246	43.65	0	5.511	95.946
QACB1	0	78.153	3.84	10.396	149.667	113.784	47.787	54.957	549.399	0.955	1.097	183.537	283.276	517.286	35.828	26.128	245.129	23.957	1.435	14.301	57.056	123.42	53.626	52.751	6.071	1.366	0.466	0	9.08	50.201	0	56.095	182.445	6.827	68.834	42.344	0	5.874	92.811
QACB2	0	134.883	7.779	10.606	152.838	125.385	48.753	68.536	554.511	0.637	1.142	192.481	297.432	530.079	36.343	26.769	250.678	26.858	1.529	15.19	60.807	131.325	55.446	56.125	7.243	1.419	0.445	0.274	12.01	53.146	0.161	58.568	208.296	6.94	71.741	43.091	0	5.705	143.04
QACB3	0	156.084	11.326	10.199	149.05	123.214	48.157	77.797	524.599	0.143	1.076	184.413	287.438	510.085	34.449	24.928	240.886	26.931	1.435	15.265	59.488	129.832	55.389	55.675	7.481	1.269	0.371	0.077	14.694	50.585	0.083	55.842	192.051	6.539	69.2	40.867	0	5.328	118.46
QACB5	0	188.243	16.584	10.316	154.536	128.38	49.834	95.022	518.661	0.941	1.068	187.212	295.621	518.146	34.446	25.096	244.938	28.521	1.37	14.284	61.923	135.824	57.208	57.811	8.113	1.317	0	0.019	19.517	51.246	0.08	57.982	187.542	6.62	70.057	40.738	0	5.354	99.88
QACB7	0	222.432	24.03	11.59	174.968	149.326	54.963	117.578	555.467	1.122	1.242	211.945	335.586	583.4	38.424	27.933	275.273	32.716	1.55	20.101	71.621	155.971	64.043	66.742	9.3	1.494	0	0.444	23.212	58.141	0	69.745	214.752	7.338	79.727	46.004	0	4.721	113.945
QAP1	0	47.886	2.626	10.906	156.427	118.495	50.171	49.472	578.222	0.523	1.147	191.93	296.56	542.679	37.636	27.53	257.502	24.998	1.543	21.917	59.734	128.081	57.362	55.272	5.878	1.449	0.453	0.07	8.337	52.121	0.114	58.049	192.23	7.161	72.541	44.339	0	7.088	97.429
QAP2	0	49.095	3.163	11.235	159.902	121.174	50.557	51.986	588.316	0.643	1.212	195.908	304.152	553.972	38.458	28.094	262.908	25.555	1.557	18.172	61.142	130.818	57.958	56.578	6.099	1.424	0.363	0	8.624	53.738	0	59.607	196.766	7.354	74.22	45.29	0	7.374	99.556
QAP3	0	48.689	3.741	10.985	155.526	118.591	48.442	53.291	566.873	0.663	1.144	190.748	302.915	539.196	37.456	27.314	255.662	24.923	1.508	17.452	59.407	127.126	57.018	55.103	5.913	1.533	0.443	0	8.614	52.366	0	58.56	191.213	7.175	72.278	43.937	0	7.438	96.341
QAP5	0	48.222	4.531	11.178	157.616	120.771	47.851	60.61	568.59	0.433	1.196	194.332	305.584	547.41	38.019	27.766	260.518	25.285	1.543	16.894	60.712	129.954	57.022	56.164	5.917	1.471	0.092	0.136	8.653	53.129	0	60.424	194.59	7.335	73.613	44.836	0	7.26	97.651
QAP7	0	46.489	5.493	10.792	153.606	127.212	44.967	61.912	541.727	0	1.106	187.32	301.386	531.279	40.385	26.632	251.103	24.414	1.48	18.13	58.911	125.392	55.24	54.191	5.796	1.432	0	0.072	8.491	51.438	0	59.084	188.14	7.07	73.338	43.343	0	6.407	94.856
Amino Acid	PSER	TAU2	ASP2	HYP2	THR2	SER2	ASN2	GLU2	GLN2	SAR	AAD	PRO2	GLY2	ALA2	CIT2	ABU	VAL2	MET2	ALLISO	CYS2	ILE2	LEU2	TYR2	PHE2	BALA2	BABA	GBA	HCY	ETN	TRP2	HYL	ORN2	LYS2	1MHIS	HIS2	3MHIS	ANSP	CARSN	ARG2
NMP2	0	38.759	3.466	5.684	96.246	91.435	47.994	47.817	576.044	0	0.415	210.756	270.91	571.115	32.105	13.38	199.333	23.136	1.581	7.13	62.874	129.441	59.156	54.281	9.29	0.777	0	0	10.645	45.909	0	39.869	127.485	4.618	74.836	28.468	0	9.624	66.225
NMP3	0	37.385	3.929	5.575	93.917	88.912	45.467	51.482	557.267	0.963	0	206.432	266.994	556.015	31.341	13.133	194.341	22.7	1.513	4.68	61.442	126.56	57.645	53.832	8.927	0	0	0	10.519	45.21	0	39.188	125.249	4.486	73.412	27.728	0	8.81	67.972
NMP5	0	38.672	5.34	5.814	97.148	98.682	45.868	62.429	560.574	0	0	215.552	280.612	576.652	32.319	13.495	200.774	23.705	1.583	6.157	63.025	130.175	59.798	57.038	9.683	1.192	0	0	11.12	46.282	0	42.27	136.013	4.754	76.793	28.723	0	9.226	81.779
NMP7	0	38.561	7.999	5.806	100.668	117.268	47.586	69.507	559.381	0.571	0	229.19	297.232	585.85	32.48	13.49	204.379	26.172	1.632	6.017	68.143	138.662	61.942	62.541	9.023	0.583	0	0	12.712	47.244	0.536	44.781	164.908	4.813	82.403	29.286	0	7.963	135.57
NMD0	0	37.157	1.727	5.375	96.665	90.776	50.237	0	611.77	0	0	208.737	273.854	572.272	25.13	13.347	199.511	22.745	1.651	43.258	61.527	128.064	56.598	53.627	0	0.979	0.309	0	8.591	46.167	0	37.283	127.97	5.214	75.308	27.915	0	5.569	61.829
NMCB1	0	60.629	4.034	5.572	95.53	94.264	48.35	0	597.232	0	0.313	210.16	277.395	570.226	45.781	13.428	199.223	22.774	1.639	54.719	60.884	129.182	55.646	53.968	0	0.979	0.391	0.096	9.764	47.558	0	40.619	128.362	5.203	75.055	28.724	0	5.564	64.538
NMCB2	0	100.957	7.963	5.729	93.029	98.999	45.409	107.82	523.247	0	0	208.545	267.065	559.083	31.952	13.014	195.405	23.287	1.522	4.474	60.558	129.245	56.778	54.721	10.383	0.388	0.228	0	13.962	46.061	0	43.374	128.547	4.439	73.169	28.044	0	5.381	71.192
NMCB3	0	144.189	10.526	5.84	104.584	106.489	52.158	92.657	564.133	0.32	0	218.394	287.913	587.101	32.26	13.366	205.581	26.745	2.157	6.518	68.97	142.722	62.646	60.348	12.721	0	0	0.383	18.041	48.519	0.085	41.982	139.379	4.569	78.922	28.691	0	6.873	82.21
NMCB5	8.226	157.85	14.999	5.833	109.192	113.389	53.222	106.413	564.883	0	0.319	228.198	309.973	610.619	33.534	13.816	214.614	29.089	1.595	5.139	70.377	150.179	65.644	63.308	13.513	0	0	0.174	20.706	50.328	0	50.584	148.6	4.682	81.384	29.581	0	6.6	81.223
NMCB7	6.086	166.805	21.038	5.76	105.204	128.86	48.354	150.085	511.728	0	0	231.791	311.456	593.111	33.803	13.304	210.643	29.794	1.672	7.289	69.634	148.596	62.35	63.799	12.52	1.248	0	0	21.385	49.957	0	60.001	172.349	4.503	81.001	29.546	0	5.237	119.479
NMP1	0	38.2	2.381	5.491	96.622	91.282	49.983	28.879	609.671	0	0.389	210.855	282.223	574.367	32.52	13.483	200.905	23.001	1.676	53.553	62.333	129.868	57.248	54.44	9.295	1.008	0	0	9.434	46.392	0	38.665	129.439	5.276	75.489	28.256	0	7.018	62.238
QAP0	0	47.196	2.004	10.644	155.128	116.587	50.086	46.411	574.328	1.459	1.078	188.696	289.27	534.062	37.003	27.037	253.587	24.672	1.525	20.421	58.946	126.013	55.904	54.395	5.79	1.373	0	0	8.029	51.485	0	56.915	189.131	7.062	71.246	43.65	0	5.511	95.946
QACB1	0	78.153	3.84	10.396	149.667	113.784	47.787	54.957	549.399	0.955	1.097	183.537	283.276	517.286	35.828	26.128	245.129	23.957	1.435	14.301	57.056	123.42	53.626	52.751	6.071	1.366	0.466	0	9.08	50.201	0	56.095	182.445	6.827	68.834	42.344	0	5.874	92.811
QACB2	0	134.883	7.779	10.606	152.838	125.385	48.753	68.536	554.511	0.637	1.142	192.481	297.432	530.079	36.343	26.769	250.678	26.858	1.529	15.19	60.807	131.325	55.446	56.125	7.243	1.419	0.445	0.274	12.01	53.146	0.161	58.568	208.296	6.94	71.741	43.091	0	5.705	143.04
QACB3	0	156.084	11.326	10.199	149.05	123.214	48.157	77.797	524.599	0.143	1.076	184.413	287.438	510.085	34.449	24.928	240.886	26.931	1.435	15.265	59.488	129.832	55.389	55.675	7.481	1.269	0.371	0.077	14.694	50.585	0.083	55.842	192.051	6.539	69.2	40.867	0	5.328	118.46
QACB5	0	188.243	16.584	10.316	154.536	128.38	49.834	95.022	518.661	0.941	1.068	187.212	295.621	518.146	34.446	25.096	244.938	28.521	1.37	14.284	61.923	135.824	57.208	57.811	8.113	1.317	0	0.019	19.517	51.246	0.08	57.982	187.542	6.62	70.057	40.738	0	5.354	99.88
QACB7	0	222.432	24.03	11.59	174.968	149.326	54.963	117.578	555.467	1.122	1.242	211.945	335.586	583.4	38.424	27.933	275.273	32.716	1.55	20.101	71.621	155.971	64.043	66.742	9.3	1.494	0	0.444	23.212	58.141	0	69.745	214.752	7.338	79.727	46.004	0	4.721	113.945
QAP1	0	47.886	2.626	10.906	156.427	118.495	50.171	49.472	578.222	0.523	1.147	191.93	296.56	542.679	37.636	27.53	257.502	24.998	1.543	21.917	59.734	128.081	57.362	55.272	5.878	1.449	0.453	0.07	8.337	52.121	0.114	58.049	192.23	7.161	72.541	44.339	0	7.088	97.429
QAP2	0	49.095	3.163	11.235	159.902	121.174	50.557	51.986	588.316	0.643	1.212	195.908	304.152	553.972	38.458	28.094	262.908	25.555	1.557	18.172	61.142	130.818	57.958	56.578	6.099	1.424	0.363	0	8.624	53.738	0	59.607	196.766	7.354	74.22	45.29	0	7.374	99.556
QAP3	0	48.689	3.741	10.985	155.526	118.591	48.442	53.291	566.873	0.663	1.144	190.748	302.915	539.196	37.456	27.314	255.662	24.923	1.508	17.452	59.407	127.126	57.018	55.103	5.913	1.533	0.443	0	8.614	52.366	0	58.56	191.213	7.175	72.278	43.937	0	7.438	96.341
QAP5	0	48.222	4.531	11.178	157.616	120.771	47.851	60.61	568.59	0.433	1.196	194.332	305.584	547.41	38.019	27.766	260.518	25.285	1.543	16.894	60.712	129.954	57.022	56.164	5.917	1.471	0.092	0.136	8.653	53.129	0	60.424	194.59	7.335	73.613	44.836	0	7.26	97.651
QAP7	0	46.489	5.493	10.792	153.606	127.212	44.967	61.912	541.727	0	1.106	187.32	301.386	531.279	40.385	26.632	251.103	24.414	1.48	18.13	58.911	125.392	55.24	54.191	5.796	1.432	0	0.072	8.491	51.438	0	59.084	188.14	7.07	73.338	43.343	0	6.407	94.856
Amino Acid	PSER	TAU2	ASP2	HYP2	THR2	SER2	ASN2	GLU2	GLN2	SAR	AAD	PRO2	GLY2	ALA2	CIT2	ABU	VAL2	MET2	ALLISO	CYS2	ILE2	LEU2	TYR2	PHE2	BALA2	BABA	GBA	HCY	ETN	TRP2	HYL	ORN2	LYS2	1MHIS	HIS2	3MHIS	ANSP	CARSN	ARG2
NMP2	0	38.759	3.466	5.684	96.246	91.435	47.994	47.817	576.044	0	0.415	210.756	270.91	571.115	32.105	13.38	199.333	23.136	1.581	7.13	62.874	129.441	59.156	54.281	9.29	0.777	0	0	10.645	45.909	0	39.869	127.485	4.618	74.836	28.468	0	9.624	66.225
NMP3	0	37.385	3.929	5.575	93.917	88.912	45.467	51.482	557.267	0.963	0	206.432	266.994	556.015	31.341	13.133	194.341	22.7	1.513	4.68	61.442	126.56	57.645	53.832	8.927	0	0	0	10.519	45.21	0	39.188	125.249	4.486	73.412	27.728	0	8.81	67.972
NMP5	0	38.672	5.34	5.814	97.148	98.682	45.868	62.429	560.574	0	0	215.552	280.612	576.652	32.319	13.495	200.774	23.705	1.583	6.157	63.025	130.175	59.798	57.038	9.683	1.192	0	0	11.12	46.282	0	42.27	136.013	4.754	76.793	28.723	0	9.226	81.779
NMP7	0	38.561	7.999	5.806	100.668	117.268	47.586	69.507	559.381	0.571	0	229.19	297.232	585.85	32.48	13.49	204.379	26.172	1.632	6.017	68.143	138.662	61.942	62.541	9.023	0.583	0	0	12.712	47.244	0.536	44.781	164.908	4.813	82.403	29.286	0	7.963	135.57
NMD0	0	37.157	1.727	5.375	96.665	90.776	50.237	0	611.77	0	0	208.737	273.854	572.272	25.13	13.347	199.511	22.745	1.651	43.258	61.527	128.064	56.598	53.627	0	0.979	0.309	0	8.591	46.167	0	37.283	127.97	5.214	75.308	27.915	0	5.569	61.829
NMCB1	0	60.629	4.034	5.572	95.53	94.264	48.35	0	597.232	0	0.313	210.16	277.395	570.226	45.781	13.428	199.223	22.774	1.639	54.719	60.884	129.182	55.646	53.968	0	0.979	0.391	0.096	9.764	47.558	0	40.619	128.362	5.203	75.055	28.724	0	5.564	64.538
NMCB2	0	100.957	7.963	5.729	93.029	98.999	45.409	107.82	523.247	0	0	208.545	267.065	559.083	31.952	13.014	195.405	23.287	1.522	4.474	60.558	129.245	56.778	54.721	10.383	0.388	0.228	0	13.962	46.061	0	43.374	128.547	4.439	73.169	28.044	0	5.381	71.192
NMCB3	0	144.189	10.526	5.84	104.584	106.489	52.158	92.657	564.133	0.32	0	218.394	287.913	587.101	32.26	13.366	205.581	26.745	2.157	6.518	68.97	142.722	62.646	60.348	12.721	0	0	0.383	18.041	48.519	0.085	41.982	139.379	4.569	78.922	28.691	0	6.873	82.21
NMCB5	8.226	157.85	14.999	5.833	109.192	113.389	53.222	106.413	564.883	0	0.319	228.198	309.973	610.619	33.534	13.816	214.614	29.089	1.595	5.139	70.377	150.179	65.644	63.308	13.513	0	0	0.174	20.706	50.328	0	50.584	148.6	4.682	81.384	29.581	0	6.6	81.223
NMCB7	6.086	166.805	21.038	5.76	105.204	128.86	48.354	150.085	511.728	0	0	231.791	311.456	593.111	33.803	13.304	210.643	29.794	1.672	7.289	69.634	148.596	62.35	63.799	12.52	1.248	0	0	21.385	49.957	0	60.001	172.349	4.503	81.001	29.546	0	5.237	119.479
NMP1	0	38.2	2.381	5.491	96.622	91.282	49.983	28.879	609.671	0	0.389	210.855	282.223	574.367	32.52	13.483	200.905	23.001	1.676	53.553	62.333	129.868	57.248	54.44	9.295	1.008	0	0	9.434	46.392	0	38.665	129.439	5.276	75.489	28.256	0	7.018	62.238
QAP0	0	47.196	2.004	10.644	155.128	116.587	50.086	46.411	574.328	1.459	1.078	188.696	289.27	534.062	37.003	27.037	253.587	24.672	1.525	20.421	58.946	126.013	55.904	54.395	5.79	1.373	0	0	8.029	51.485	0	56.915	189.131	7.062	71.246	43.65	0	5.511	95.946
QACB1	0	78.153	3.84	10.396	149.667	113.784	47.787	54.957	549.399	0.955	1.097	183.537	283.276	517.286	35.828	26.128	245.129	23.957	1.435	14.301	57.056	123.42	53.626	52.751	6.071	1.366	0.466	0	9.08	50.201	0	56.095	182.445	6.827	68.834	42.344	0	5.874	92.811
QACB2	0	134.883	7.779	10.606	152.838	125.385	48.753	68.536	554.511	0.637	1.142	192.481	297.432	530.079	36.343	26.769	250.678	26.858	1.529	15.19	60.807	131.325	55.446	56.125	7.243	1.419	0.445	0.274	12.01	53.146	0.161	58.568	208.296	6.94	71.741	43.091	0	5.705	143.04
QACB3	0	156.084	11.326	10.199	149.05	123.214	48.157	77.797	524.599	0.143	1.076	184.413	287.438	510.085	34.449	24.928	240.886	26.931	1.435	15.265	59.488	129.832	55.389	55.675	7.481	1.269	0.371	0.077	14.694	50.585	0.083	55.842	192.051	6.539	69.2	40.867	0	5.328	118.46
QACB5	0	188.243	16.584	10.316	154.536	128.38	49.834	95.022	518.661	0.941	1.068	187.212	295.621	518.146	34.446	25.096	244.938	28.521	1.37	14.284	61.923	135.824	57.208	57.811	8.113	1.317	0	0.019	19.517	51.246	0.08	57.982	187.542	6.62	70.057	40.738	0	5.354	99.88
QACB7	0	222.432	24.03	11.59	174.968	149.326	54.963	117.578	555.467	1.122	1.242	211.945	335.586	583.4	38.424	27.933	275.273	32.716	1.55	20.101	71.621	155.971	64.043	66.742	9.3	1.494	0	0.444	23.212	58.141	0	69.745	214.752	7.338	79.727	46.004	0	4.721	113.945
QAP1	0	47.886	2.626	10.906	156.427	118.495	50.171	49.472	578.222	0.523	1.147	191.93	296.56	542.679	37.636	27.53	257.502	24.998	1.543	21.917	59.734	128.081	57.362	55.272	5.878	1.449	0.453	0.07	8.337	52.121	0.114	58.049	192.23	7.161	72.541	44.339	0	7.088	97.429
QAP2	0	49.095	3.163	11.235	159.902	121.174	50.557	51.986	588.316	0.643	1.212	195.908	304.152	553.972	38.458	28.094	262.908	25.555	1.557	18.172	61.142	130.818	57.958	56.578	6.099	1.424	0.363	0	8.624	53.738	0	59.607	196.766	7.354	74.22	45.29	0	7.374	99.556
QAP3	0	48.689	3.741	10.985	155.526	118.591	48.442	53.291	566.873	0.663	1.144	190.748	302.915	539.196	37.456	27.314	255.662	24.923	1.508	17.452	59.407	127.126	57.018	55.103	5.913	1.533	0.443	0	8.614	52.366	0	58.56	191.213	7.175	72.278	43.937	0	7.438	96.341
QAP5	0	48.222	4.531	11.178	157.616	120.771	47.851	60.61	568.59	0.433	1.196	194.332	305.584	547.41	38.019	27.766	260.518	25.285	1.543	16.894	60.712	129.954	57.022	56.164	5.917	1.471	0.092	0.136	8.653	53.129	0	60.424	194.59	7.335	73.613	44.836	0	7.26	97.651
QAP7	0	46.489	5.493	10.792	153.606	127.212	44.967	61.912	541.727	0	1.106	187.32	301.386	531.279	40.385	26.632	251.103	24.414	1.48	18.13	58.911	125.392	55.24	54.191	5.796	1.432	0	0.072	8.491	51.438	0	59.084	188.14	7.07	73.338	43.343	0	6.407	94.856
Amino Acid	PSER	TAU2	ASP2	HYP2	THR2	SER2	ASN2	GLU2	GLN2	SAR	AAD	PRO2	GLY2	ALA2	CIT2	ABU	VAL2	MET2	ALLISO	CYS2	ILE2	LEU2	TYR2	PHE2	BALA2	BABA	GBA	HCY	ETN	TRP2	HYL	ORN2	LYS2	1MHIS	HIS2	3MHIS	ANSP	CARSN	ARG2
NMP2	0	38.759	3.466	5.684	96.246	91.435	47.994	47.817	576.044	0	0.415	210.756	270.91	571.115	32.105	13.38	199.333	23.136	1.581	7.13	62.874	129.441	59.156	54.281	9.29	0.777	0	0	10.645	45.909	0	39.869	127.485	4.618	74.836	28.468	0	9.624	66.225
NMP3	0	37.385	3.929	5.575	93.917	88.912	45.467	51.482	557.267	0.963	0	206.432	266.994	556.015	31.341	13.133	194.341	22.7	1.513	4.68	61.442	126.56	57.645	53.832	8.927	0	0	0	10.519	45.21	0	39.188	125.249	4.486	73.412	27.728	0	8.81	67.972
NMP5	0	38.672	5.34	5.814	97.148	98.682	45.868	62.429	560.574	0	0	215.552	280.612	576.652	32.319	13.495	200.774	23.705	1.583	6.157	63.025	130.175	59.798	57.038	9.683	1.192	0	0	11.12	46.282	0	42.27	136.013	4.754	76.793	28.723	0	9.226	81.779
NMP7	0	38.561	7.999	5.806	100.668	117.268	47.586	69.507	559.381	0.571	0	229.19	297.232	585.85	32.48	13.49	204.379	26.172	1.632	6.017	68.143	138.662	61.942	62.541	9.023	0.583	0	0	12.712	47.244	0.536	44.781	164.908	4.813	82.403	29.286	0	7.963	135.57
NMD0	0	37.157	1.727	5.375	96.665	90.776	50.237	0	611.77	0	0	208.737	273.854	572.272	25.13	13.347	199.511	22.745	1.651	43.258	61.527	128.064	56.598	53.627	0	0.979	0.309	0	8.591	46.167	0	37.283	127.97	5.214	75.308	27.915	0	5.569	61.829
NMCB1	0	60.629	4.034	5.572	95.53	94.264	48.35	0	597.232	0	0.313	210.16	277.395	570.226	45.781	13.428	199.223	22.774	1.639	54.719	60.884	129.182	55.646	53.968	0	0.979	0.391	0.096	9.764	47.558	0	40.619	128.362	5.203	75.055	28.724	0	5.564	64.538
NMCB2	0	100.957	7.963	5.729	93.029	98.999	45.409	107.82	523.247	0	0	208.545	267.065	559.083	31.952	13.014	195.405	23.287	1.522	4.474	60.558	129.245	56.778	54.721	10.383	0.388	0.228	0	13.962	46.061	0	43.374	128.547	4.439	73.169	28.044	0	5.381	71.192
NMCB3	0	144.189	10.526	5.84	104.584	106.489	52.158	92.657	564.133	0.32	0	218.394	287.913	587.101	32.26	13.366	205.581	26.745	2.157	6.518	68.97	142.722	62.646	60.348	12.721	0	0	0.383	18.041	48.519	0.085	41.982	139.379	4.569	78.922	28.691	0	6.873	82.21
NMCB5	8.226	157.85	14.999	5.833	109.192	113.389	53.222	106.413	564.883	0	0.319	228.198	309.973	610.619	33.534	13.816	214.614	29.089	1.595	5.139	70.377	150.179	65.644	63.308	13.513	0	0	0.174	20.706	50.328	0	50.584	148.6	4.682	81.384	29.581	0	6.6	81.223
NMCB7	6.086	166.805	21.038	5.76	105.204	128.86	48.354	150.085	511.728	0	0	231.791	311.456	593.111	33.803	13.304	210.643	29.794	1.672	7.289	69.634	148.596	62.35	63.799	12.52	1.248	0	0	21.385	49.957	0	60.001	172.349	4.503	81.001	29.546	0	5.237	119.479
NMP1	0	38.2	2.381	5.491	96.622	91.282	49.983	28.879	609.671	0	0.389	210.855	282.223	574.367	32.52	13.483	200.905	23.001	1.676	53.553	62.333	129.868	57.248	54.44	9.295	1.008	0	0	9.434	46.392	0	38.665	129.439	5.276	75.489	28.256	0	7.018	62.238
QAP0	0	47.196	2.004	10.644	155.128	116.587	50.086	46.411	574.328	1.459	1.078	188.696	289.27	534.062	37.003	27.037	253.587	24.672	1.525	20.421	58.946	126.013	55.904	54.395	5.79	1.373	0	0	8.029	51.485	0	56.915	189.131	7.062	71.246	43.65	0	5.511	95.946
QACB1	0	78.153	3.84	10.396	149.667	113.784	47.787	54.957	549.399	0.955	1.097	183.537	283.276	517.286	35.828	26.128	245.129	23.957	1.435	14.301	57.056	123.42	53.626	52.751	6.071	1.366	0.466	0	9.08	50.201	0	56.095	182.445	6.827	68.834	42.344	0	5.874	92.811
QACB2	0	134.883	7.779	10.606	152.838	125.385	48.753	68.536	554.511	0.637	1.142	192.481	297.432	530.079	36.343	26.769	250.678	26.858	1.529	15.19	60.807	131.325	55.446	56.125	7.243	1.419	0.445	0.274	12.01	53.146	0.161	58.568	208.296	6.94	71.741	43.091	0	5.705	143.04
QACB3	0	156.084	11.326	10.199	149.05	123.214	48.157	77.797	524.599	0.143	1.076	184.413	287.438	510.085	34.449	24.928	240.886	26.931	1.435	15.265	59.488	129.832	55.389	55.675	7.481	1.269	0.371	0.077	14.694	50.585	0.083	55.842	192.051	6.539	69.2	40.867	0	5.328	118.46
QACB5	0	188.243	16.584	10.316	154.536	128.38	49.834	95.022	518.661	0.941	1.068	187.212	295.621	518.146	34.446	25.096	244.938	28.521	1.37	14.284	61.923	135.824	57.208	57.811	8.113	1.317	0	0.019	19.517	51.246	0.08	57.982	187.542	6.62	70.057	40.738	0	5.354	99.88
QACB7	0	222.432	24.03	11.59	174.968	149.326	54.963	117.578	555.467	1.122	1.242	211.945	335.586	583.4	38.424	27.933	275.273	32.716	1.55	20.101	71.621	155.971	64.043	66.742	9.3	1.494	0	0.444	23.212	58.141	0	69.745	214.752	7.338	79.727	46.004	0	4.721	113.945
QAP1	0	47.886	2.626	10.906	156.427	118.495	50.171	49.472	578.222	0.523	1.147	191.93	296.56	542.679	37.636	27.53	257.502	24.998	1.543	21.917	59.734	128.081	57.362	55.272	5.878	1.449	0.453	0.07	8.337	52.121	0.114	58.049	192.23	7.161	72.541	44.339	0	7.088	97.429
QAP2	0	49.095	3.163	11.235	159.902	121.174	50.557	51.986	588.316	0.643	1.212	195.908	304.152	553.972	38.458	28.094	262.908	25.555	1.557	18.172	61.142	130.818	57.958	56.578	6.099	1.424	0.363	0	8.624	53.738	0	59.607	196.766	7.354	74.22	45.29	0	7.374	99.556
QAP3	0	48.689	3.741	10.985	155.526	118.591	48.442	53.291	566.873	0.663	1.144	190.748	302.915	539.196	37.456	27.314	255.662	24.923	1.508	17.452	59.407	127.126	57.018	55.103	5.913	1.533	0.443	0	8.614	52.366	0	58.56	191.213	7.175	72.278	43.937	0	7.438	96.341
QAP5	0	48.222	4.531	11.178	157.616	120.771	47.851	60.61	568.59	0.433	1.196	194.332	305.584	547.41	38.019	27.766	260.518	25.285	1.543	16.894	60.712	129.954	57.022	56.164	5.917	1.471	0.092	0.136	8.653	53.129	0	60.424	194.59	7.335	73.613	44.836	0	7.26	97.651
QAP7	0	46.489	5.493	10.792	153.606	127.212	44.967	61.912	541.727	0	1.106	187.32	301.386	531.279	40.385	26.632	251.103	24.414	1.48	18.13	58.911	125.392	55.24	54.191	5.796	1.432	0	0.072	8.491	51.438	0	59.084	188.14	7.07	73.338	43.343	0	6.407	94.856
Amino Acid	PSER	TAU2	ASP2	HYP2	THR2	SER2	ASN2	GLU2	GLN2	SAR	AAD	PRO2	GLY2	ALA2	CIT2	ABU	VAL2	MET2	ALLISO	CYS2	ILE2	LEU2	TYR2	PHE2	BALA2	BABA	GBA	HCY	ETN	TRP2	HYL	ORN2	LYS2	1MHIS	HIS2	3MHIS	ANSP	CARSN	ARG2
NMP2	0	38.759	3.466	5.684	96.246	91.435	47.994	47.817	576.044	0	0.415	210.756	270.91	571.115	32.105	13.38	199.333	23.136	1.581	7.13	62.874	129.441	59.156	54.281	9.29	0.777	0	0	10.645	45.909	0	39.869	127.485	4.618	74.836	28.468	0	9.624	66.225
NMP3	0	37.385	3.929	5.575	93.917	88.912	45.467	51.482	557.267	0.963	0	206.432	266.994	556.015	31.341	13.133	194.341	22.7	1.513	4.68	61.442	126.56	57.645	53.832	8.927	0	0	0	10.519	45.21	0	39.188	125.249	4.486	73.412	27.728	0	8.81	67.972
NMP5	0	38.672	5.34	5.814	97.148	98.682	45.868	62.429	560.574	0	0	215.552	280.612	576.652	32.319	13.495	200.774	23.705	1.583	6.157	63.025	130.175	59.798	57.038	9.683	1.192	0	0	11.12	46.282	0	42.27	136.013	4.754	76.793	28.723	0	9.226	81.779
NMP7	0	38.561	7.999	5.806	100.668	117.268	47.586	69.507	559.381	0.571	0	229.19	297.232	585.85	32.48	13.49	204.379	26.172	1.632	6.017	68.143	138.662	61.942	62.541	9.023	0.583	0	0	12.712	47.244	0.536	44.781	164.908	4.813	82.403	29.286	0	7.963	135.57
NMD0	0	37.157	1.727	5.375	96.665	90.776	50.237	0	611.77	0	0	208.737	273.854	572.272	25.13	13.347	199.511	22.745	1.651	43.258	61.527	128.064	56.598	53.627	0	0.979	0.309	0	8.591	46.167	0	37.283	127.97	5.214	75.308	27.915	0	5.569	61.829
NMCB1	0	60.629	4.034	5.572	95.53	94.264	48.35	0	597.232	0	0.313	210.16	277.395	570.226	45.781	13.428	199.223	22.774	1.639	54.719	60.884	129.182	55.646	53.968	0	0.979	0.391	0.096	9.764	47.558	0	40.619	128.362	5.203	75.055	28.724	0	5.564	64.538
NMCB2	0	100.957	7.963	5.729	93.029	98.999	45.409	107.82	523.247	0	0	208.545	267.065	559.083	31.952	13.014	195.405	23.287	1.522	4.474	60.558	129.245	56.778	54.721	10.383	0.388	0.228	0	13.962	46.061	0	43.374	128.547	4.439	73.169	28.044	0	5.381	71.192
NMCB3	0	144.189	10.526	5.84	104.584	106.489	52.158	92.657	564.133	0.32	0	218.394	287.913	587.101	32.26	13.366	205.581	26.745	2.157	6.518	68.97	142.722	62.646	60.348	12.721	0	0	0.383	18.041	48.519	0.085	41.982	139.379	4.569	78.922	28.691	0	6.873	82.21
NMCB5	8.226	157.85	14.999	5.833	109.192	113.389	53.222	106.413	564.883	0	0.319	228.198	309.973	610.619	33.534	13.816	214.614	29.089	1.595	5.139	70.377	150.179	65.644	63.308	13.513	0	0	0.174	20.706	50.328	0	50.584	148.6	4.682	81.384	29.581	0	6.6	81.223
NMCB7	6.086	166.805	21.038	5.76	105.204	128.86	48.354	150.085	511.728	0	0	231.791	311.456	593.111	33.803	13.304	210.643	29.794	1.672	7.289	69.634	148.596	62.35	63.799	12.52	1.248	0	0	21.385	49.957	0	60.001	172.349	4.503	81.001	29.546	0	5.237	119.479
NMP1	0	38.2	2.381	5.491	96.622	91.282	49.983	28.879	609.671	0	0.389	210.855	282.223	574.367	32.52	13.483	200.905	23.001	1.676	53.553	62.333	129.868	57.248	54.44	9.295	1.008	0	0	9.434	46.392	0	38.665	129.439	5.276	75.489	28.256	0	7.018	62.238
QAP0	0	47.196	2.004	10.644	155.128	116.587	50.086	46.411	574.328	1.459	1.078	188.696	289.27	534.062	37.003	27.037	253.587	24.672	1.525	20.421	58.946	126.013	55.904	54.395	5.79	1.373	0	0	8.029	51.485	0	56.915	189.131	7.062	71.246	43.65	0	5.511	95.946
QACB1	0	78.153	3.84	10.396	149.667	113.784	47.787	54.957	549.399	0.955	1.097	183.537	283.276	517.286	35.828	26.128	245.129	23.957	1.435	14.301	57.056	123.42	53.626	52.751	6.071	1.366	0.466	0	9.08	50.201	0	56.095	182.445	6.827	68.834	42.344	0	5.874	92.811
QACB2	0	134.883	7.779	10.606	152.838	125.385	48.753	68.536	554.511	0.637	1.142	192.481	297.432	530.079	36.343	26.769	250.678	26.858	1.529	15.19	60.807	131.325	55.446	56.125	7.243	1.419	0.445	0.274	12.01	53.146	0.161	58.568	208.296	6.94	71.741	43.091	0	5.705	143.04
QACB3	0	156.084	11.326	10.199	149.05	123.214	48.157	77.797	524.599	0.143	1.076	184.413	287.438	510.085	34.449	24.928	240.886	26.931	1.435	15.265	59.488	129.832	55.389	55.675	7.481	1.269	0.371	0.077	14.694	50.585	0.083	55.842	192.051	6.539	69.2	40.867	0	5.328	118.46
QACB5	0	188.243	16.584	10.316	154.536	128.38	49.834	95.022	518.661	0.941	1.068	187.212	295.621	518.146	34.446	25.096	244.938	28.521	1.37	14.284	61.923	135.824	57.208	57.811	8.113	1.317	0	0.019	19.517	51.246	0.08	57.982	187.542	6.62	70.057	40.738	0	5.354	99.88
QACB7	0	222.432	24.03	11.59	174.968	149.326	54.963	117.578	555.467	1.122	1.242	211.945	335.586	583.4	38.424	27.933	275.273	32.716	1.55	20.101	71.621	155.971	64.043	66.742	9.3	1.494	0	0.444	23.212	58.141	0	69.745	214.752	7.338	79.727	46.004	0	4.721	113.945
QAP1	0	47.886	2.626	10.906	156.427	118.495	50.171	49.472	578.222	0.523	1.147	191.93	296.56	542.679	37.636	27.53	257.502	24.998	1.543	21.917	59.734	128.081	57.362	55.272	5.878	1.449	0.453	0.07	8.337	52.121	0.114	58.049	192.23	7.161	72.541	44.339	0	7.088	97.429
QAP2	0	49.095	3.163	11.235	159.902	121.174	50.557	51.986	588.316	0.643	1.212	195.908	304.152	553.972	38.458	28.094	262.908	25.555	1.557	18.172	61.142	130.818	57.958	56.578	6.099	1.424	0.363	0	8.624	53.738	0	59.607	196.766	7.354	74.22	45.29	0	7.374	99.556
QAP3	0	48.689	3.741	10.985	155.526	118.591	48.442	53.291	566.873	0.663	1.144	190.748	302.915	539.196	37.456	27.314	255.662	24.923	1.508	17.452	59.407	127.126	57.018	55.103	5.913	1.533	0.443	0	8.614	52.366	0	58.56	191.213	7.175	72.278	43.937	0	7.438	96.341
QAP5	0	48.222	4.531	11.178	157.616	120.771	47.851	60.61	568.59	0.433	1.196	194.332	305.584	547.41	38.019	27.766	260.518	25.285	1.543	16.894	60.712	129.954	57.022	56.164	5.917	1.471	0.092	0.136	8.653	53.129	0	60.424	194.59	7.335	73.613	44.836	0	7.26	97.651
QAP7	0	46.489	5.493	10.792	153.606	127.212	44.967	61.912	541.727	0	1.106	187.32	301.386	531.279	40.385	26.632	251.103	24.414	1.48	18.13	58.911	125.392	55.24	54.191	5.796	1.432	0	0.072	8.491	51.438	0	59.084	188.14	7.07	73.338	43.343	0	6.407	94.856
Amino Acid	PSER	TAU2	ASP2	HYP2	THR2	SER2	ASN2	GLU2	GLN2	SAR	AAD	PRO2	GLY2	ALA2	CIT2	ABU	VAL2	MET2	ALLISO	CYS2	ILE2	LEU2	TYR2	PHE2	BALA2	BABA	GBA	HCY	ETN	TRP2	HYL	ORN2	LYS2	1MHIS	HIS2	3MHIS	ANSP	CARSN	ARG2
NMP2	0	38.759	3.466	5.684	96.246	91.435	47.994	47.817	576.044	0	0.415	210.756	270.91	571.115	32.105	13.38	199.333	23.136	1.581	7.13	62.874	129.441	59.156	54.281	9.29	0.777	0	0	10.645	45.909	0	39.869	127.485	4.618	74.836	28.468	0	9.624	66.225
NMP3	0	37.385	3.929	5.575	93.917	88.912	45.467	51.482	557.267	0.963	0	206.432	266.994	556.015	31.341	13.133	194.341	22.7	1.513	4.68	61.442	126.56	57.645	53.832	8.927	0	0	0	10.519	45.21	0	39.188	125.249	4.486	73.412	27.728	0	8.81	67.972
NMP5	0	38.672	5.34	5.814	97.148	98.682	45.868	62.429	560.574	0	0	215.552	280.612	576.652	32.319	13.495	200.774	23.705	1.583	6.157	63.025	130.175	59.798	57.038	9.683	1.192	0	0	11.12	46.282	0	42.27	136.013	4.754	76.793	28.723	0	9.226	81.779
NMP7	0	38.561	7.999	5.806	100.668	117.268	47.586	69.507	559.381	0.571	0	229.19	297.232	585.85	32.48	13.49	204.379	26.172	1.632	6.017	68.143	138.662	61.942	62.541	9.023	0.583	0	0	12.712	47.244	0.536	44.781	164.908	4.813	82.403	29.286	0	7.963	135.57
NMD0	0	37.157	1.727	5.375	96.665	90.776	50.237	0	611.77	0	0	208.737	273.854	572.272	25.13	13.347	199.511	22.745	1.651	43.258	61.527	128.064	56.598	53.627	0	0.979	0.309	0	8.591	46.167	0	37.283	127.97	5.214	75.308	27.915	0	5.569	61.829
NMCB1	0	60.629	4.034	5.572	95.53	94.264	48.35	0	597.232	0	0.313	210.16	277.395	570.226	45.781	13.428	199.223	22.774	1.639	54.719	60.884	129.182	55.646	53.968	0	0.979	0.391	0.096	9.764	47.558	0	40.619	128.362	5.203	75.055	28.724	0	5.564	64.538
NMCB2	0	100.957	7.963	5.729	93.029	98.999	45.409	107.82	523.247	0	0	208.545	267.065	559.083	31.952	13.014	195.405	23.287	1.522	4.474	60.558	129.245	56.778	54.721	10.383	0.388	0.228	0	13.962	46.061	0	43.374	128.547	4.439	73.169	28.044	0	5.381	71.192
NMCB3	0	144.189	10.526	5.84	104.584	106.489	52.158	92.657	564.133	0.32	0	218.394	287.913	587.101	32.26	13.366	205.581	26.745	2.157	6.518	68.97	142.722	62.646	60.348	12.721	0	0	0.383	18.041	48.519	0.085	41.982	139.379	4.569	78.922	28.691	0	6.873	82.21
NMCB5	8.226	157.85	14.999	5.833	109.192	113.389	53.222	106.413	564.883	0	0.319	228.198	309.973	610.619	33.534	13.816	214.614	29.089	1.595	5.139	70.377	150.179	65.644	63.308	13.513	0	0	0.174	20.706	50.328	0	50.584	148.6	4.682	81.384	29.581	0	6.6	81.223
NMCB7	6.086	166.805	21.038	5.76	105.204	128.86	48.354	150.085	511.728	0	0	231.791	311.456	593.111	33.803	13.304	210.643	29.794	1.672	7.289	69.634	148.596	62.35	63.799	12.52	1.248	0	0	21.385	49.957	0	60.001	172.349	4.503	81.001	29.546	0	5.237	119.479
NMP1	0	38.2	2.381	5.491	96.622	91.282	49.983	28.879	609.671	0	0.389	210.855	282.223	574.367	32.52	13.483	200.905	23.001	1.676	53.553	62.333	129.868	57.248	54.44	9.295	1.008	0	0	9.434	46.392	0	38.665	129.439	5.276	75.489	28.256	0	7.018	62.238
QAP0	0	47.196	2.004	10.644	155.128	116.587	50.086	46.411	574.328	1.459	1.078	188.696	289.27	534.062	37.003	27.037	253.587	24.672	1.525	20.421	58.946	126.013	55.904	54.395	5.79	1.373	0	0	8.029	51.485	0	56.915	189.131	7.062	71.246	43.65	0	5.511	95.946
QACB1	0	78.153	3.84	10.396	149.667	113.784	47.787	54.957	549.399	0.955	1.097	183.537	283.276	517.286	35.828	26.128	245.129	23.957	1.435	14.301	57.056	123.42	53.626	52.751	6.071	1.366	0.466	0	9.08	50.201	0	56.095	182.445	6.827	68.834	42.344	0	5.874	92.811
QACB2	0	134.883	7.779	10.606	152.838	125.385	48.753	68.536	554.511	0.637	1.142	192.481	297.432	530.079	36.343	26.769	250.678	26.858	1.529	15.19	60.807	131.325	55.446	56.125	7.243	1.419	0.445	0.274	12.01	53.146	0.161	58.568	208.296	6.94	71.741	43.091	0	5.705	143.04
QACB3	0	156.084	11.326	10.199	149.05	123.214	48.157	77.797	524.599	0.143	1.076	184.413	287.438	510.085	34.449	24.928	240.886	26.931	1.435	15.265	59.488	129.832	55.389	55.675	7.481	1.269	0.371	0.077	14.694	50.585	0.083	55.842	192.051	6.539	69.2	40.867	0	5.328	118.46
QACB5	0	188.243	16.584	10.316	154.536	128.38	49.834	95.022	518.661	0.941	1.068	187.212	295.621	518.146	34.446	25.096	244.938	28.521	1.37	14.284	61.923	135.824	57.208	57.811	8.113	1.317	0	0.019	19.517	51.246	0.08	57.982	187.542	6.62	70.057	40.738	0	5.354	99.88
QACB7	0	222.432	24.03	11.59	174.968	149.326	54.963	117.578	555.467	1.122	1.242	211.945	335.586	583.4	38.424	27.933	275.273	32.716	1.55	20.101	71.621	155.971	64.043	66.742	9.3	1.494	0	0.444	23.212	58.141	0	69.745	214.752	7.338	79.727	46.004	0	4.721	113.945
QAP1	0	47.886	2.626	10.906	156.427	118.495	50.171	49.472	578.222	0.523	1.147	191.93	296.56	542.679	37.636	27.53	257.502	24.998	1.543	21.917	59.734	128.081	57.362	55.272	5.878	1.449	0.453	0.07	8.337	52.121	0.114	58.049	192.23	7.161	72.541	44.339	0	7.088	97.429
QAP2	0	49.095	3.163	11.235	159.902	121.174	50.557	51.986	588.316	0.643	1.212	195.908	304.152	553.972	38.458	28.094	262.908	25.555	1.557	18.172	61.142	130.818	57.958	56.578	6.099	1.424	0.363	0	8.624	53.738	0	59.607	196.766	7.354	74.22	45.29	0	7.374	99.556
QAP3	0	48.689	3.741	10.985	155.526	118.591	48.442	53.291	566.873	0.663	1.144	190.748	302.915	539.196	37.456	27.314	255.662	24.923	1.508	17.452	59.407	127.126	57.018	55.103	5.913	1.533	0.443	0	8.614	52.366	0	58.56	191.213	7.175	72.278	43.937	0	7.438	96.341
QAP5	0	48.222	4.531	11.178	157.616	120.771	47.851	60.61	568.59	0.433	1.196	194.332	305.584	547.41	38.019	27.766	260.518	25.285	1.543	16.894	60.712	129.954	57.022	56.164	5.917	1.471	0.092	0.136	8.653	53.129	0	60.424	194.59	7.335	73.613	44.836	0	7.26	97.651
QAP7	0	46.489	5.493	10.792	153.606	127.212	44.967	61.912	541.727	0	1.106	187.32	301.386	531.279	40.385	26.632	251.103	24.414	1.48	18.13	58.911	125.392	55.24	54.191	5.796	1.432	0	0.072	8.491	51.438	0	59.084	188.14	7.07	73.338	43.343	0	6.407	94.856
Amino Acid	PSER	TAU2	ASP2	HYP2	THR2	SER2	ASN2	GLU2	GLN2	SAR	AAD	PRO2	GLY2	ALA2	CIT2	ABU	VAL2	MET2	ALLISO	CYS2	ILE2	LEU2	TYR2	PHE2	BALA2	BABA	GBA	HCY	ETN	TRP2	HYL	ORN2	LYS2	1MHIS	HIS2	3MHIS	ANSP	CARSN	ARG2
NMP2	0	38.759	3.466	5.684	96.246	91.435	47.994	47.817	576.044	0	0.415	210.756	270.91	571.115	32.105	13.38	199.333	23.136	1.581	7.13	62.874	129.441	59.156	54.281	9.29	0.777	0	0	10.645	45.909	0	39.869	127.485	4.618	74.836	28.468	0	9.624	66.225
NMP3	0	37.385	3.929	5.575	93.917	88.912	45.467	51.482	557.267	0.963	0	206.432	266.994	556.015	31.341	13.133	194.341	22.7	1.513	4.68	61.442	126.56	57.645	53.832	8.927	0	0	0	10.519	45.21	0	39.188	125.249	4.486	73.412	27.728	0	8.81	67.972
NMP5	0	38.672	5.34	5.814	97.148	98.682	45.868	62.429	560.574	0	0	215.552	280.612	576.652	32.319	13.495	200.774	23.705	1.583	6.157	63.025	130.175	59.798	57.038	9.683	1.192	0	0	11.12	46.282	0	42.27	136.013	4.754	76.793	28.723	0	9.226	81.779
NMP7	0	38.561	7.999	5.806	100.668	117.268	47.586	69.507	559.381	0.571	0	229.19	297.232	585.85	32.48	13.49	204.379	26.172	1.632	6.017	68.143	138.662	61.942	62.541	9.023	0.583	0	0	12.712	47.244	0.536	44.781	164.908	4.813	82.403	29.286	0	7.963	135.57
NMD0	0	37.157	1.727	5.375	96.665	90.776	50.237	0	611.77	0	0	208.737	273.854	572.272	25.13	13.347	199.511	22.745	1.651	43.258	61.527	128.064	56.598	53.627	0	0.979	0.309	0	8.591	46.167	0	37.283	127.97	5.214	75.308	27.915	0	5.569	61.829
NMCB1	0	60.629	4.034	5.572	95.53	94.264	48.35	0	597.232	0	0.313	210.16	277.395	570.226	45.781	13.428	199.223	22.774	1.639	54.719	60.884	129.182	55.646	53.968	0	0.979	0.391	0.096	9.764	47.558	0	40.619	128.362	5.203	75.055	28.724	0	5.564	64.538
NMCB2	0	100.957	7.963	5.729	93.029	98.999	45.409	107.82	523.247	0	0	208.545	267.065	559.083	31.952	13.014	195.405	23.287	1.522	4.474	60.558	129.245	56.778	54.721	10.383	0.388	0.228	0	13.962	46.061	0	43.374	128.547	4.439	73.169	28.044	0	5.381	71.192
NMCB3	0	144.189	10.526	5.84	104.584	106.489	52.158	92.657	564.133	0.32	0	218.394	287.913	587.101	32.26	13.366	205.581	26.745	2.157	6.518	68.97	142.722	62.646	60.348	12.721	0	0	0.383	18.041	48.519	0.085	41.982	139.379	4.569	78.922	28.691	0	6.873	82.21
NMCB5	8.226	157.85	14.999	5.833	109.192	113.389	53.222	106.413	564.883	0	0.319	228.198	309.973	610.619	33.534	13.816	214.614	29.089	1.595	5.139	70.377	150.179	65.644	63.308	13.513	0	0	0.174	20.706	50.328	0	50.584	148.6	4.682	81.384	29.581	0	6.6	81.223
NMCB7	6.086	166.805	21.038	5.76	105.204	128.86	48.354	150.085	511.728	0	0	231.791	311.456	593.111	33.803	13.304	210.643	29.794	1.672	7.289	69.634	148.596	62.35	63.799	12.52	1.248	0	0	21.385	49.957	0	60.001	172.349	4.503	81.001	29.546	0	5.237	119.479
NMP1	0	38.2	2.381	5.491	96.622	91.282	49.983	28.879	609.671	0	0.389	210.855	282.223	574.367	32.52	13.483	200.905	23.001	1.676	53.553	62.333	129.868	57.248	54.44	9.295	1.008	0	0	9.434	46.392	0	38.665	129.439	5.276	75.489	28.256	0	7.018	62.238
QAP0	0	47.196	2.004	10.644	155.128	116.587	50.086	46.411	574.328	1.459	1.078	188.696	289.27	534.062	37.003	27.037	253.587	24.672	1.525	20.421	58.946	126.013	55.904	54.395	5.79	1.373	0	0	8.029	51.485	0	56.915	189.131	7.062	71.246	43.65	0	5.511	95.946
QACB1	0	78.153	3.84	10.396	149.667	113.784	47.787	54.957	549.399	0.955	1.097	183.537	283.276	517.286	35.828	26.128	245.129	23.957	1.435	14.301	57.056	123.42	53.626	52.751	6.071	1.366	0.466	0	9.08	50.201	0	56.095	182.445	6.827	68.834	42.344	0	5.874	92.811
QACB2	0	134.883	7.779	10.606	152.838	125.385	48.753	68.536	554.511	0.637	1.142	192.481	297.432	530.079	36.343	26.769	250.678	26.858	1.529	15.19	60.807	131.325	55.446	56.125	7.243	1.419	0.445	0.274	12.01	53.146	0.161	58.568	208.296	6.94	71.741	43.091	0	5.705	143.04
QACB3	0	156.084	11.326	10.199	149.05	123.214	48.157	77.797	524.599	0.143	1.076	184.413	287.438	510.085	34.449	24.928	240.886	26.931	1.435	15.265	59.488	129.832	55.389	55.675	7.481	1.269	0.371	0.077	14.694	50.585	0.083	55.842	192.051	6.539	69.2	40.867	0	5.328	118.46
QACB5	0	188.243	16.584	10.316	154.536	128.38	49.834	95.022	518.661	0.941	1.068	187.212	295.621	518.146	34.446	25.096	244.938	28.521	1.37	14.284	61.923	135.824	57.208	57.811	8.113	1.317	0	0.019	19.517	51.246	0.08	57.982	187.542	6.62	70.057	40.738	0	5.354	99.88
QACB7	0	222.432	24.03	11.59	174.968	149.326	54.963	117.578	555.467	1.122	1.242	211.945	335.586	583.4	38.424	27.933	275.273	32.716	1.55	20.101	71.621	155.971	64.043	66.742	9.3	1.494	0	0.444	23.212	58.141	0	69.745	214.752	7.338	79.727	46.004	0	4.721	113.945
QAP1	0	47.886	2.626	10.906	156.427	118.495	50.171	49.472	578.222	0.523	1.147	191.93	296.56	542.679	37.636	27.53	257.502	24.998	1.543	21.917	59.734	128.081	57.362	55.272	5.878	1.449	0.453	0.07	8.337	52.121	0.114	58.049	192.23	7.161	72.541	44.339	0	7.088	97.429
QAP2	0	49.095	3.163	11.235	159.902	121.174	50.557	51.986	588.316	0.643	1.212	195.908	304.152	553.972	38.458	28.094	262.908	25.555	1.557	18.172	61.142	130.818	57.958	56.578	6.099	1.424	0.363	0	8.624	53.738	0	59.607	196.766	7.354	74.22	45.29	0	7.374	99.556
QAP3	0	48.689	3.741	10.985	155.526	118.591	48.442	53.291	566.873	0.663	1.144	190.748	302.915	539.196	37.456	27.314	255.662	24.923	1.508	17.452	59.407	127.126	57.018	55.103	5.913	1.533	0.443	0	8.614	52.366	0	58.56	191.213	7.175	72.278	43.937	0	7.438	96.341
QAP5	0	48.222	4.531	11.178	157.616	120.771	47.851	60.61	568.59	0.433	1.196	194.332	305.584	547.41	38.019	27.766	260.518	25.285	1.543	16.894	60.712	129.954	57.022	56.164	5.917	1.471	0.092	0.136	8.653	53.129	0	60.424	194.59	7.335	73.613	44.836	0	7.26	97.651
QAP7	0	46.489	5.493	10.792	153.606	127.212	44.967	61.912	541.727	0	1.106	187.32	301.386	531.279	40.385	26.632	251.103	24.414	1.48	18.13	58.911	125.392	55.24	54.191	5.796	1.432	0	0.072	8.491	51.438	0	59.084	188.14	7.07	73.338	43.343	0	6.407	94.856
Amino Acid	PSER	TAU2	ASP2	HYP2	THR2	SER2	ASN2	GLU2	GLN2	SAR	AAD	PRO2	GLY2	ALA2	CIT2	ABU	VAL2	MET2	ALLISO	CYS2	ILE2	LEU2	TYR2	PHE2	BALA2	BABA	GBA	HCY	ETN	TRP2	HYL	ORN2	LYS2	1MHIS	HIS2	3MHIS	ANSP	CARSN	ARG2
NMP2	0	38.759	3.466	5.684	96.246	91.435	47.994	47.817	576.044	0	0.415	210.756	270.91	571.115	32.105	13.38	199.333	23.136	1.581	7.13	62.874	129.441	59.156	54.281	9.29	0.777	0	0	10.645	45.909	0	39.869	127.485	4.618	74.836	28.468	0	9.624	66.225
NMP3	0	37.385	3.929	5.575	93.917	88.912	45.467	51.482	557.267	0.963	0	206.432	266.994	556.015	31.341	13.133	194.341	22.7	1.513	4.68	61.442	126.56	57.645	53.832	8.927	0	0	0	10.519	45.21	0	39.188	125.249	4.486	73.412	27.728	0	8.81	67.972
NMP5	0	38.672	5.34	5.814	97.148	98.682	45.868	62.429	560.574	0	0	215.552	280.612	576.652	32.319	13.495	200.774	23.705	1.583	6.157	63.025	130.175	59.798	57.038	9.683	1.192	0	0	11.12	46.282	0	42.27	136.013	4.754	76.793	28.723	0	9.226	81.779
NMP7	0	38.561	7.999	5.806	100.668	117.268	47.586	69.507	559.381	0.571	0	229.19	297.232	585.85	32.48	13.49	204.379	26.172	1.632	6.017	68.143	138.662	61.942	62.541	9.023	0.583	0	0	12.712	47.244	0.536	44.781	164.908	4.813	82.403	29.286	0	7.963	135.57
NMD0	0	37.157	1.727	5.375	96.665	90.776	50.237	0	611.77	0	0	208.737	273.854	572.272	25.13	13.347	199.511	22.745	1.651	43.258	61.527	128.064	56.598	53.627	0	0.979	0.309	0	8.591	46.167	0	37.283	127.97	5.214	75.308	27.915	0	5.569	61.829
NMCB1	0	60.629	4.034	5.572	95.53	94.264	48.35	0	597.232	0	0.313	210.16	277.395	570.226	45.781	13.428	199.223	22.774	1.639	54.719	60.884	129.182	55.646	53.968	0	0.979	0.391	0.096	9.764	47.558	0	40.619	128.362	5.203	75.055	28.724	0	5.564	64.538
NMCB2	0	100.957	7.963	5.729	93.029	98.999	45.409	107.82	523.247	0	0	208.545	267.065	559.083	31.952	13.014	195.405	23.287	1.522	4.474	60.558	129.245	56.778	54.721	10.383	0.388	0.228	0	13.962	46.061	0	43.374	128.547	4.439	73.169	28.044	0	5.381	71.192
NMCB3	0	144.189	10.526	5.84	104.584	106.489	52.158	92.657	564.133	0.32	0	218.394	287.913	587.101	32.26	13.366	205.581	26.745	2.157	6.518	68.97	142.722	62.646	60.348	12.721	0	0	0.383	18.041	48.519	0.085	41.982	139.379	4.569	78.922	28.691	0	6.873	82.21
NMCB5	8.226	157.85	14.999	5.833	109.192	113.389	53.222	106.413	564.883	0	0.319	228.198	309.973	610.619	33.534	13.816	214.614	29.089	1.595	5.139	70.377	150.179	65.644	63.308	13.513	0	0	0.174	20.706	50.328	0	50.584	148.6	4.682	81.384	29.581	0	6.6	81.223
NMCB7	6.086	166.805	21.038	5.76	105.204	128.86	48.354	150.085	511.728	0	0	231.791	311.456	593.111	33.803	13.304	210.643	29.794	1.672	7.289	69.634	148.596	62.35	63.799	12.52	1.248	0	0	21.385	49.957	0	60.001	172.349	4.503	81.001	29.546	0	5.237	119.479
NMP1	0	38.2	2.381	5.491	96.622	91.282	49.983	28.879	609.671	0	0.389	210.855	282.223	574.367	32.52	13.483	200.905	23.001	1.676	53.553	62.333	129.868	57.248	54.44	9.295	1.008	0	0	9.434	46.392	0	38.665	129.439	5.276	75.489	28.256	0	7.018	62.238
QAP0	0	47.196	2.004	10.644	155.128	116.587	50.086	46.411	574.328	1.459	1.078	188.696	289.27	534.062	37.003	27.037	253.587	24.672	1.525	20.421	58.946	126.013	55.904	54.395	5.79	1.373	0	0	8.029	51.485	0	56.915	189.131	7.062	71.246	43.65	0	5.511	95.946
QACB1	0	78.153	3.84	10.396	149.667	113.784	47.787	54.957	549.399	0.955	1.097	183.537	283.276	517.286	35.828	26.128	245.129	23.957	1.435	14.301	57.056	123.42	53.626	52.751	6.071	1.366	0.466	0	9.08	50.201	0	56.095	182.445	6.827	68.834	42.344	0	5.874	92.811
QACB2	0	134.883	7.779	10.606	152.838	125.385	48.753	68.536	554.511	0.637	1.142	192.481	297.432	530.079	36.343	26.769	250.678	26.858	1.529	15.19	60.807	131.325	55.446	56.125	7.243	1.419	0.445	0.274	12.01	53.146	0.161	58.568	208.296	6.94	71.741	43.091	0	5.705	143.04
QACB3	0	156.084	11.326	10.199	149.05	123.214	48.157	77.797	524.599	0.143	1.076	184.413	287.438	510.085	34.449	24.928	240.886	26.931	1.435	15.265	59.488	129.832	55.389	55.675	7.481	1.269	0.371	0.077	14.694	50.585	0.083	55.842	192.051	6.539	69.2	40.867	0	5.328	118.46
QACB5	0	188.243	16.584	10.316	154.536	128.38	49.834	95.022	518.661	0.941	1.068	187.212	295.621	518.146	34.446	25.096	244.938	28.521	1.37	14.284	61.923	135.824	57.208	57.811	8.113	1.317	0	0.019	19.517	51.246	0.08	57.982	187.542	6.62	70.057	40.738	0	5.354	99.88
QACB7	0	222.432	24.03	11.59	174.968	149.326	54.963	117.578	555.467	1.122	1.242	211.945	335.586	583.4	38.424	27.933	275.273	32.716	1.55	20.101	71.621	155.971	64.043	66.742	9.3	1.494	0	0.444	23.212	58.141	0	69.745	214.752	7.338	79.727	46.004	0	4.721	113.945
QAP1	0	47.886	2.626	10.906	156.427	118.495	50.171	49.472	578.222	0.523	1.147	191.93	296.56	542.679	37.636	27.53	257.502	24.998	1.543	21.917	59.734	128.081	57.362	55.272	5.878	1.449	0.453	0.07	8.337	52.121	0.114	58.049	192.23	7.161	72.541	44.339	0	7.088	97.429
QAP2	0	49.095	3.163	11.235	159.902	121.174	50.557	51.986	588.316	0.643	1.212	195.908	304.152	553.972	38.458	28.094	262.908	25.555	1.557	18.172	61.142	130.818	57.958	56.578	6.099	1.424	0.363	0	8.624	53.738	0	59.607	196.766	7.354	74.22	45.29	0	7.374	99.556
QAP3	0	48.689	3.741	10.985	155.526	118.591	48.442	53.291	566.873	0.663	1.144	190.748	302.915	539.196	37.456	27.314	255.662	24.923	1.508	17.452	59.407	127.126	57.018	55.103	5.913	1.533	0.443	0	8.614	52.366	0	58.56	191.213	7.175	72.278	43.937	0	7.438	96.341
QAP5	0	48.222	4.531	11.178	157.616	120.771	47.851	60.61	568.59	0.433	1.196	194.332	305.584	547.41	38.019	27.766	260.518	25.285	1.543	16.894	60.712	129.954	57.022	56.164	5.917	1.471	0.092	0.136	8.653	53.129	0	60.424	194.59	7.335	73.613	44.836	0	7.26	97.651
QAP7	0	46.489	5.493	10.792	153.606	127.212	44.967	61.912	541.727	0	1.106	187.32	301.386	531.279	40.385	26.632	251.103	24.414	1.48	18.13	58.911	125.392	55.24	54.191	5.796	1.432	0	0.072	8.491	51.438	0	59.084	188.14	7.07	73.338	43.343	0	6.407	94.856
Amino Acid	PSER	TAU2	ASP2	HYP2	THR2	SER2	ASN2	GLU2	GLN2	SAR	AAD	PRO2	GLY2	ALA2	CIT2	ABU	VAL2	MET2	ALLISO	CYS2	ILE2	LEU2	TYR2	PHE2	BALA2	BABA	GBA	HCY	ETN	TRP2	HYL	ORN2	LYS2	1MHIS	HIS2	3MHIS	ANSP	CARSN	ARG2
NMP2	0	38.759	3.466	5.684	96.246	91.435	47.994	47.817	576.044	0	0.415	210.756	270.91	571.115	32.105	13.38	199.333	23.136	1.581	7.13	62.874	129.441	59.156	54.281	9.29	0.777	0	0	10.645	45.909	0	39.869	127.485	4.618	74.836	28.468	0	9.624	66.225
NMP3	0	37.385	3.929	5.575	93.917	88.912	45.467	51.482	557.267	0.963	0	206.432	266.994	556.015	31.341	13.133	194.341	22.7	1.513	4.68	61.442	126.56	57.645	53.832	8.927	0	0	0	10.519	45.21	0	39.188	125.249	4.486	73.412	27.728	0	8.81	67.972
NMP5	0	38.672	5.34	5.814	97.148	98.682	45.868	62.429	560.574	0	0	215.552	280.612	576.652	32.319	13.495	200.774	23.705	1.583	6.157	63.025	130.175	59.798	57.038	9.683	1.192	0	0	11.12	46.282	0	42.27	136.013	4.754	76.793	28.723	0	9.226	81.779
NMP7	0	38.561	7.999	5.806	100.668	117.268	47.586	69.507	559.381	0.571	0	229.19	297.232	585.85	32.48	13.49	204.379	26.172	1.632	6.017	68.143	138.662	61.942	62.541	9.023	0.583	0	0	12.712	47.244	0.536	44.781	164.908	4.813	82.403	29.286	0	7.963	135.57
NMD0	0	37.157	1.727	5.375	96.665	90.776	50.237	0	611.77	0	0	208.737	273.854	572.272	25.13	13.347	199.511	22.745	1.651	43.258	61.527	128.064	56.598	53.627	0	0.979	0.309	0	8.591	46.167	0	37.283	127.97	5.214	75.308	27.915	0	5.569	61.829
NMCB1	0	60.629	4.034	5.572	95.53	94.264	48.35	0	597.232	0	0.313	210.16	277.395	570.226	45.781	13.428	199.223	22.774	1.639	54.719	60.884	129.182	55.646	53.968	0	0.979	0.391	0.096	9.764	47.558	0	40.619	128.362	5.203	75.055	28.724	0	5.564	64.538
NMCB2	0	100.957	7.963	5.729	93.029	98.999	45.409	107.82	523.247	0	0	208.545	267.065	559.083	31.952	13.014	195.405	23.287	1.522	4.474	60.558	129.245	56.778	54.721	10.383	0.388	0.228	0	13.962	46.061	0	43.374	128.547	4.439	73.169	28.044	0	5.381	71.192
NMCB3	0	144.189	10.526	5.84	104.584	106.489	52.158	92.657	564.133	0.32	0	218.394	287.913	587.101	32.26	13.366	205.581	26.745	2.157	6.518	68.97	142.722	62.646	60.348	12.721	0	0	0.383	18.041	48.519	0.085	41.982	139.379	4.569	78.922	28.691	0	6.873	82.21
NMCB5	8.226	157.85	14.999	5.833	109.192	113.389	53.222	106.413	564.883	0	0.319	228.198	309.973	610.619	33.534	13.816	214.614	29.089	1.595	5.139	70.377	150.179	65.644	63.308	13.513	0	0	0.174	20.706	50.328	0	50.584	148.6	4.682	81.384	29.581	0	6.6	81.223
NMCB7	6.086	166.805	21.038	5.76	105.204	128.86	48.354	150.085	511.728	0	0	231.791	311.456	593.111	33.803	13.304	210.643	29.794	1.672	7.289	69.634	148.596	62.35	63.799	12.52	1.248	0	0	21.385	49.957	0	60.001	172.349	4.503	81.001	29.546	0	5.237	119.479
NMP1	0	38.2	2.381	5.491	96.622	91.282	49.983	28.879	609.671	0	0.389	210.855	282.223	574.367	32.52	13.483	200.905	23.001	1.676	53.553	62.333	129.868	57.248	54.44	9.295	1.008	0	0	9.434	46.392	0	38.665	129.439	5.276	75.489	28.256	0	7.018	62.238
QAP0	0	47.196	2.004	10.644	155.128	116.587	50.086	46.411	574.328	1.459	1.078	188.696	289.27	534.062	37.003	27.037	253.587	24.672	1.525	20.421	58.946	126.013	55.904	54.395	5.79	1.373	0	0	8.029	51.485	0	56.915	189.131	7.062	71.246	43.65	0	5.511	95.946
QACB1	0	78.153	3.84	10.396	149.667	113.784	47.787	54.957	549.399	0.955	1.097	183.537	283.276	517.286	35.828	26.128	245.129	23.957	1.435	14.301	57.056	123.42	53.626	52.751	6.071	1.366	0.466	0	9.08	50.201	0	56.095	182.445	6.827	68.834	42.344	0	5.874	92.811
QACB2	0	134.883	7.779	10.606	152.838	125.385	48.753	68.536	554.511	0.637	1.142	192.481	297.432	530.079	36.343	26.769	250.678	26.858	1.529	15.19	60.807	131.325	55.446	56.125	7.243	1.419	0.445	0.274	12.01	53.146	0.161	58.568	208.296	6.94	71.741	43.091	0	5.705	143.04
QACB3	0	156.084	11.326	10.199	149.05	123.214	48.157	77.797	524.599	0.143	1.076	184.413	287.438	510.085	34.449	24.928	240.886	26.931	1.435	15.265	59.488	129.832	55.389	55.675	7.481	1.269	0.371	0.077	14.694	50.585	0.083	55.842	192.051	6.539	69.2	40.867	0	5.328	118.46
QACB5	0	188.243	16.584	10.316	154.536	128.38	49.834	95.022	518.661	0.941	1.068	187.212	295.621	518.146	34.446	25.096	244.938	28.521	1.37	14.284	61.923	135.824	57.208	57.811	8.113	1.317	0	0.019	19.517	51.246	0.08	57.982	187.542	6.62	70.057	40.738	0	5.354	99.88
QACB7	0	222.432	24.03	11.59	174.968	149.326	54.963	117.578	555.467	1.122	1.242	211.945	335.586	583.4	38.424	27.933	275.273	32.716	1.55	20.101	71.621	155.971	64.043	66.742	9.3	1.494	0	0.444	23.212	58.141	0	69.745	214.752	7.338	79.727	46.004	0	4.721	113.945
QAP1	0	47.886	2.626	10.906	156.427	118.495	50.171	49.472	578.222	0.523	1.147	191.93	296.56	542.679	37.636	27.53	257.502	24.998	1.543	21.917	59.734	128.081	57.362	55.272	5.878	1.449	0.453	0.07	8.337	52.121	0.114	58.049	192.23	7.161	72.541	44.339	0	7.088	97.429
QAP2	0	49.095	3.163	11.235	159.902	121.174	50.557	51.986	588.316	0.643	1.212	195.908	304.152	553.972	38.458	28.094	262.908	25.555	1.557	18.172	61.142	130.818	57.958	56.578	6.099	1.424	0.363	0	8.624	53.738	0	59.607	196.766	7.354	74.22	45.29	0	7.374	99.556
QAP3	0	48.689	3.741	10.985	155.526	118.591	48.442	53.291	566.873	0.663	1.144	190.748	302.915	539.196	37.456	27.314	255.662	24.923	1.508	17.452	59.407	127.126	57.018	55.103	5.913	1.533	0.443	0	8.614	52.366	0	58.56	191.213	7.175	72.278	43.937	0	7.438	96.341
QAP5	0	48.222	4.531	11.178	157.616	120.771	47.851	60.61	568.59	0.433	1.196	194.332	305.584	547.41	38.019	27.766	260.518	25.285	1.543	16.894	60.712	129.954	57.022	56.164	5.917	1.471	0.092	0.136	8.653	53.129	0	60.424	194.59	7.335	73.613	44.836	0	7.26	97.651
QAP7	0	46.489	5.493	10.792	153.606	127.212	44.967	61.912	541.727	0	1.106	187.32	301.386	531.279	40.385	26.632	251.103	24.414	1.48	18.13	58.911	125.392	55.24	54.191	5.796	1.432	0	0.072	8.491	51.438	0	59.084	188.14	7.07	73.338	43.343	0	6.407	94.856
Amino Acid	PSER	TAU2	ASP2	HYP2	THR2	SER2	ASN2	GLU2	GLN2	SAR	AAD	PRO2	GLY2	ALA2	CIT2	ABU	VAL2	MET2	ALLISO	CYS2	ILE2	LEU2	TYR2	PHE2	BALA2	BABA	GBA	HCY	ETN	TRP2	HYL	ORN2	LYS2	1MHIS	HIS2	3MHIS	ANSP	CARSN	ARG2
NMP2	0	38.759	3.466	5.684	96.246	91.435	47.994	47.817	576.044	0	0.415	210.756	270.91	571.115	32.105	13.38	199.333	23.136	1.581	7.13	62.874	129.441	59.156	54.281	9.29	0.777	0	0	10.645	45.909	0	39.869	127.485	4.618	74.836	28.468	0	9.624	66.225
NMP3	0	37.385	3.929	5.575	93.917	88.912	45.467	51.482	557.267	0.963	0	206.432	266.994	556.015	31.341	13.133	194.341	22.7	1.513	4.68	61.442	126.56	57.645	53.832	8.927	0	0	0	10.519	45.21	0	39.188	125.249	4.486	73.412	27.728	0	8.81	67.972
NMP5	0	38.672	5.34	5.814	97.148	98.682	45.868	62.429	560.574	0	0	215.552	280.612	576.652	32.319	13.495	200.774	23.705	1.583	6.157	63.025	130.175	59.798	57.038	9.683	1.192	0	0	11.12	46.282	0	42.27	136.013	4.754	76.793	28.723	0	9.226	81.779
NMP7	0	38.561	7.999	5.806	100.668	117.268	47.586	69.507	559.381	0.571	0	229.19	297.232	585.85	32.48	13.49	204.379	26.172	1.632	6.017	68.143	138.662	61.942	62.541	9.023	0.583	0	0	12.712	47.244	0.536	44.781	164.908	4.813	82.403	29.286	0	7.963	135.57
NMD0	0	37.157	1.727	5.375	96.665	90.776	50.237	0	611.77	0	0	208.737	273.854	572.272	25.13	13.347	199.511	22.745	1.651	43.258	61.527	128.064	56.598	53.627	0	0.979	0.309	0	8.591	46.167	0	37.283	127.97	5.214	75.308	27.915	0	5.569	61.829
NMCB1	0	60.629	4.034	5.572	95.53	94.264	48.35	0	597.232	0	0.313	210.16	277.395	570.226	45.781	13.428	199.223	22.774	1.639	54.719	60.884	129.182	55.646	53.968	0	0.979	0.391	0.096	9.764	47.558	0	40.619	128.362	5.203	75.055	28.724	0	5.564	64.538
NMCB2	0	100.957	7.963	5.729	93.029	98.999	45.409	107.82	523.247	0	0	208.545	267.065	559.083	31.952	13.014	195.405	23.287	1.522	4.474	60.558	129.245	56.778	54.721	10.383	0.388	0.228	0	13.962	46.061	0	43.374	128.547	4.439	73.169	28.044	0	5.381	71.192
NMCB3	0	144.189	10.526	5.84	104.584	106.489	52.158	92.657	564.133	0.32	0	218.394	287.913	587.101	32.26	13.366	205.581	26.745	2.157	6.518	68.97	142.722	62.646	60.348	12.721	0	0	0.383	18.041	48.519	0.085	41.982	139.379	4.569	78.922	28.691	0	6.873	82.21
NMCB5	8.226	157.85	14.999	5.833	109.192	113.389	53.222	106.413	564.883	0	0.319	228.198	309.973	610.619	33.534	13.816	214.614	29.089	1.595	5.139	70.377	150.179	65.644	63.308	13.513	0	0	0.174	20.706	50.328	0	50.584	148.6	4.682	81.384	29.581	0	6.6	81.223
NMCB7	6.086	166.805	21.038	5.76	105.204	128.86	48.354	150.085	511.728	0	0	231.791	311.456	593.111	33.803	13.304	210.643	29.794	1.672	7.289	69.634	148.596	62.35	63.799	12.52	1.248	0	0	21.385	49.957	0	60.001	172.349	4.503	81.001	29.546	0	5.237	119.479
NMP1	0	38.2	2.381	5.491	96.622	91.282	49.983	28.879	609.671	0	0.389	210.855	282.223	574.367	32.52	13.483	200.905	23.001	1.676	53.553	62.333	129.868	57.248	54.44	9.295	1.008	0	0	9.434	46.392	0	38.665	129.439	5.276	75.489	28.256	0	7.018	62.238
QAP0	0	47.196	2.004	10.644	155.128	116.587	50.086	46.411	574.328	1.459	1.078	188.696	289.27	534.062	37.003	27.037	253.587	24.672	1.525	20.421	58.946	126.013	55.904	54.395	5.79	1.373	0	0	8.029	51.485	0	56.915	189.131	7.062	71.246	43.65	0	5.511	95.946
QACB1	0	78.153	3.84	10.396	149.667	113.784	47.787	54.957	549.399	0.955	1.097	183.537	283.276	517.286	35.828	26.128	245.129	23.957	1.435	14.301	57.056	123.42	53.626	52.751	6.071	1.366	0.466	0	9.08	50.201	0	56.095	182.445	6.827	68.834	42.344	0	5.874	92.811
QACB2	0	134.883	7.779	10.606	152.838	125.385	48.753	68.536	554.511	0.637	1.142	192.481	297.432	530.079	36.343	26.769	250.678	26.858	1.529	15.19	60.807	131.325	55.446	56.125	7.243	1.419	0.445	0.274	12.01	53.146	0.161	58.568	208.296	6.94	71.741	43.091	0	5.705	143.04
QACB3	0	156.084	11.326	10.199	149.05	123.214	48.157	77.797	524.599	0.143	1.076	184.413	287.438	510.085	34.449	24.928	240.886	26.931	1.435	15.265	59.488	129.832	55.389	55.675	7.481	1.269	0.371	0.077	14.694	50.585	0.083	55.842	192.051	6.539	69.2	40.867	0	5.328	118.46
QACB5	0	188.243	16.584	10.316	154.536	128.38	49.834	95.022	518.661	0.941	1.068	187.212	295.621	518.146	34.446	25.096	244.938	28.521	1.37	14.284	61.923	135.824	57.208	57.811	8.113	1.317	0	0.019	19.517	51.246	0.08	57.982	187.542	6.62	70.057	40.738	0	5.354	99.88
QACB7	0	222.432	24.03	11.59	174.968	149.326	54.963	117.578	555.467	1.122	1.242	211.945	335.586	583.4	38.424	27.933	275.273	32.716	1.55	20.101	71.621	155.971	64.043	66.742	9.3	1.494	0	0.444	23.212	58.141	0	69.745	214.752	7.338	79.727	46.004	0	4.721	113.945
QAP1	0	47.886	2.626	10.906	156.427	118.495	50.171	49.472	578.222	0.523	1.147	191.93	296.56	542.679	37.636	27.53	257.502	24.998	1.543	21.917	59.734	128.081	57.362	55.272	5.878	1.449	0.453	0.07	8.337	52.121	0.114	58.049	192.23	7.161	72.541	44.339	0	7.088	97.429
QAP2	0	49.095	3.163	11.235	159.902	121.174	50.557	51.986	588.316	0.643	1.212	195.908	304.152	553.972	38.458	28.094	262.908	25.555	1.557	18.172	61.142	130.818	57.958	56.578	6.099	1.424	0.363	0	8.624	53.738	0	59.607	196.766	7.354	74.22	45.29	0	7.374	99.556
QAP3	0	48.689	3.741	10.985	155.526	118.591	48.442	53.291	566.873	0.663	1.144	190.748	302.915	539.196	37.456	27.314	255.662	24.923	1.508	17.452	59.407	127.126	57.018	55.103	5.913	1.533	0.443	0	8.614	52.366	0	58.56	191.213	7.175	72.278	43.937	0	7.438	96.341
QAP5	0	48.222	4.531	11.178	157.616	120.771	47.851	60.61	568.59	0.433	1.196	194.332	305.584	547.41	38.019	27.766	260.518	25.285	1.543	16.894	60.712	129.954	57.022	56.164	5.917	1.471	0.092	0.136	8.653	53.129	0	60.424	194.59	7.335	73.613	44.836	0	7.26	97.651
QAP7	0	46.489	5.493	10.792	153.606	127.212	44.967	61.912	541.727	0	1.106	187.32	301.386	531.279	40.385	26.632	251.103	24.414	1.48	18.13	58.911	125.392	55.24	54.191	5.796	1.432	0	0.072	8.491	51.438	0	59.084	188.14	7.07	73.338	43.343	0	6.407	94.856
Amino Acid	PSER	TAU2	ASP2	HYP2	THR2	SER2	ASN2	GLU2	GLN2	SAR	AAD	PRO2	GLY2	ALA2	CIT2	ABU	VAL2	MET2	ALLISO	CYS2	ILE2	LEU2	TYR2	PHE2	BALA2	BABA	GBA	HCY	ETN	TRP2	HYL	ORN2	LYS2	1MHIS	HIS2	3MHIS	ANSP	CARSN	ARG2
NMP2	0	38.759	3.466	5.684	96.246	91.435	47.994	47.817	576.044	0	0.415	210.756	270.91	571.115	32.105	13.38	199.333	23.136	1.581	7.13	62.874	129.441	59.156	54.281	9.29	0.777	0	0	10.645	45.909	0	39.869	127.485	4.618	74.836	28.468	0	9.624	66.225
NMP3	0	37.385	3.929	5.575	93.917	88.912	45.467	51.482	557.267	0.963	0	206.432	266.994	556.015	31.341	13.133	194.341	22.7	1.513	4.68	61.442	126.56	57.645	53.832	8.927	0	0	0	10.519	45.21	0	39.188	125.249	4.486	73.412	27.728	0	8.81	67.972
NMP5	0	38.672	5.34	5.814	97.148	98.682	45.868	62.429	560.574	0	0	215.552	280.612	576.652	32.319	13.495	200.774	23.705	1.583	6.157	63.025	130.175	59.798	57.038	9.683	1.192	0	0	11.12	46.282	0	42.27	136.013	4.754	76.793	28.723	0	9.226	81.779
NMP7	0	38.561	7.999	5.806	100.668	117.268	47.586	69.507	559.381	0.571	0	229.19	297.232	585.85	32.48	13.49	204.379	26.172	1.632	6.017	68.143	138.662	61.942	62.541	9.023	0.583	0	0	12.712	47.244	0.536	44.781	164.908	4.813	82.403	29.286	0	7.963	135.57
NMD0	0	37.157	1.727	5.375	96.665	90.776	50.237	0	611.77	0	0	208.737	273.854	572.272	25.13	13.347	199.511	22.745	1.651	43.258	61.527	128.064	56.598	53.627	0	0.979	0.309	0	8.591	46.167	0	37.283	127.97	5.214	75.308	27.915	0	5.569	61.829
NMCB1	0	60.629	4.034	5.572	95.53	94.264	48.35	0	597.232	0	0.313	210.16	277.395	570.226	45.781	13.428	199.223	22.774	1.639	54.719	60.884	129.182	55.646	53.968	0	0.979	0.391	0.096	9.764	47.558	0	40.619	128.362	5.203	75.055	28.724	0	5.564	64.538
NMCB2	0	100.957	7.963	5.729	93.029	98.999	45.409	107.82	523.247	0	0	208.545	267.065	559.083	31.952	13.014	195.405	23.287	1.522	4.474	60.558	129.245	56.778	54.721	10.383	0.388	0.228	0	13.962	46.061	0	43.374	128.547	4.439	73.169	28.044	0	5.381	71.192
NMCB3	0	144.189	10.526	5.84	104.584	106.489	52.158	92.657	564.133	0.32	0	218.394	287.913	587.101	32.26	13.366	205.581	26.745	2.157	6.518	68.97	142.722	62.646	60.348	12.721	0	0	0.383	18.041	48.519	0.085	41.982	139.379	4.569	78.922	28.691	0	6.873	82.21
NMCB5	8.226	157.85	14.999	5.833	109.192	113.389	53.222	106.413	564.883	0	0.319	228.198	309.973	610.619	33.534	13.816	214.614	29.089	1.595	5.139	70.377	150.179	65.644	63.308	13.513	0	0	0.174	20.706	50.328	0	50.584	148.6	4.682	81.384	29.581	0	6.6	81.223
NMCB7	6.086	166.805	21.038	5.76	105.204	128.86	48.354	150.085	511.728	0	0	231.791	311.456	593.111	33.803	13.304	210.643	29.794	1.672	7.289	69.634	148.596	62.35	63.799	12.52	1.248	0	0	21.385	49.957	0	60.001	172.349	4.503	81.001	29.546	0	5.237	119.479
NMP1	0	38.2	2.381	5.491	96.622	91.282	49.983	28.879	609.671	0	0.389	210.855	282.223	574.367	32.52	13.483	200.905	23.001	1.676	53.553	62.333	129.868	57.248	54.44	9.295	1.008	0	0	9.434	46.392	0	38.665	129.439	5.276	75.489	28.256	0	7.018	62.238
QAP0	0	47.196	2.004	10.644	155.128	116.587	50.086	46.411	574.328	1.459	1.078	188.696	289.27	534.062	37.003	27.037	253.587	24.672	1.525	20.421	58.946	126.013	55.904	54.395	5.79	1.373	0	0	8.029	51.485	0	56.915	189.131	7.062	71.246	43.65	0	5.511	95.946
QACB1	0	78.153	3.84	10.396	149.667	113.784	47.787	54.957	549.399	0.955	1.097	183.537	283.276	517.286	35.828	26.128	245.129	23.957	1.435	14.301	57.056	123.42	53.626	52.751	6.071	1.366	0.466	0	9.08	50.201	0	56.095	182.445	6.827	68.834	42.344	0	5.874	92.811
QACB2	0	134.883	7.779	10.606	152.838	125.385	48.753	68.536	554.511	0.637	1.142	192.481	297.432	530.079	36.343	26.769	250.678	26.858	1.529	15.19	60.807	131.325	55.446	56.125	7.243	1.419	0.445	0.274	12.01	53.146	0.161	58.568	208.296	6.94	71.741	43.091	0	5.705	143.04
QACB3	0	156.084	11.326	10.199	149.05	123.214	48.157	77.797	524.599	0.143	1.076	184.413	287.438	510.085	34.449	24.928	240.886	26.931	1.435	15.265	59.488	129.832	55.389	55.675	7.481	1.269	0.371	0.077	14.694	50.585	0.083	55.842	192.051	6.539	69.2	40.867	0	5.328	118.46
QACB5	0	188.243	16.584	10.316	154.536	128.38	49.834	95.022	518.661	0.941	1.068	187.212	295.621	518.146	34.446	25.096	244.938	28.521	1.37	14.284	61.923	135.824	57.208	57.811	8.113	1.317	0	0.019	19.517	51.246	0.08	57.982	187.542	6.62	70.057	40.738	0	5.354	99.88
QACB7	0	222.432	24.03	11.59	174.968	149.326	54.963	117.578	555.467	1.122	1.242	211.945	335.586	583.4	38.424	27.933	275.273	32.716	1.55	20.101	71.621	155.971	64.043	66.742	9.3	1.494	0	0.444	23.212	58.141	0	69.745	214.752	7.338	79.727	46.004	0	4.721	113.945
QAP1	0	47.886	2.626	10.906	156.427	118.495	50.171	49.472	578.222	0.523	1.147	191.93	296.56	542.679	37.636	27.53	257.502	24.998	1.543	21.917	59.734	128.081	57.362	55.272	5.878	1.449	0.453	0.07	8.337	52.121	0.114	58.049	192.23	7.161	72.541	44.339	0	7.088	97.429
QAP2	0	49.095	3.163	11.235	159.902	121.174	50.557	51.986	588.316	0.643	1.212	195.908	304.152	553.972	38.458	28.094	262.908	25.555	1.557	18.172	61.142	130.818	57.958	56.578	6.099	1.424	0.363	0	8.624	53.738	0	59.607	196.766	7.354	74.22	45.29	0	7.374	99.556
QAP3	0	48.689	3.741	10.985	155.526	118.591	48.442	53.291	566.873	0.663	1.144	190.748	302.915	539.196	37.456	27.314	255.662	24.923	1.508	17.452	59.407	127.126	57.018	55.103	5.913	1.533	0.443	0	8.614	52.366	0	58.56	191.213	7.175	72.278	43.937	0	7.438	96.341
QAP5	0	48.222	4.531	11.178	157.616	120.771	47.851	60.61	568.59	0.433	1.196	194.332	305.584	547.41	38.019	27.766	260.518	25.285	1.543	16.894	60.712	129.954	57.022	56.164	5.917	1.471	0.092	0.136	8.653	53.129	0	60.424	194.59	7.335	73.613	44.836	0	7.26	97.651
QAP7	0	46.489	5.493	10.792	153.606	127.212	44.967	61.912	541.727	0	1.106	187.32	301.386	531.279	40.385	26.632	251.103	24.414	1.48	18.13	58.911	125.392	55.24	54.191	5.796	1.432	0	0.072	8.491	51.438	0	59.084	188.14	7.07	73.338	43.343	0	6.407	94.856
Amino Acid	PSER	TAU2	ASP2	HYP2	THR2	SER2	ASN2	GLU2	GLN2	SAR	AAD	PRO2	GLY2	ALA2	CIT2	ABU	VAL2	MET2	ALLISO	CYS2	ILE2	LEU2	TYR2	PHE2	BALA2	BABA	GBA	HCY	ETN	TRP2	HYL	ORN2	LYS2	1MHIS	HIS2	3MHIS	ANSP	CARSN	ARG2
NMP2	0	38.759	3.466	5.684	96.246	91.435	47.994	47.817	576.044	0	0.415	210.756	270.91	571.115	32.105	13.38	199.333	23.136	1.581	7.13	62.874	129.441	59.156	54.281	9.29	0.777	0	0	10.645	45.909	0	39.869	127.485	4.618	74.836	28.468	0	9.624	66.225
NMP3	0	37.385	3.929	5.575	93.917	88.912	45.467	51.482	557.267	0.963	0	206.432	266.994	556.015	31.341	13.133	194.341	22.7	1.513	4.68	61.442	126.56	57.645	53.832	8.927	0	0	0	10.519	45.21	0	39.188	125.249	4.486	73.412	27.728	0	8.81	67.972
NMP5	0	38.672	5.34	5.814	97.148	98.682	45.868	62.429	560.574	0	0	215.552	280.612	576.652	32.319	13.495	200.774	23.705	1.583	6.157	63.025	130.175	59.798	57.038	9.683	1.192	0	0	11.12	46.282	0	42.27	136.013	4.754	76.793	28.723	0	9.226	81.779
NMP7	0	38.561	7.999	5.806	100.668	117.268	47.586	69.507	559.381	0.571	0	229.19	297.232	585.85	32.48	13.49	204.379	26.172	1.632	6.017	68.143	138.662	61.942	62.541	9.023	0.583	0	0	12.712	47.244	0.536	44.781	164.908	4.813	82.403	29.286	0	7.963	135.57
NMD0	0	37.157	1.727	5.375	96.665	90.776	50.237	0	611.77	0	0	208.737	273.854	572.272	25.13	13.347	199.511	22.745	1.651	43.258	61.527	128.064	56.598	53.627	0	0.979	0.309	0	8.591	46.167	0	37.283	127.97	5.214	75.308	27.915	0	5.569	61.829
NMCB1	0	60.629	4.034	5.572	95.53	94.264	48.35	0	597.232	0	0.313	210.16	277.395	570.226	45.781	13.428	199.223	22.774	1.639	54.719	60.884	129.182	55.646	53.968	0	0.979	0.391	0.096	9.764	47.558	0	40.619	128.362	5.203	75.055	28.724	0	5.564	64.538
NMCB2	0	100.957	7.963	5.729	93.029	98.999	45.409	107.82	523.247	0	0	208.545	267.065	559.083	31.952	13.014	195.405	23.287	1.522	4.474	60.558	129.245	56.778	54.721	10.383	0.388	0.228	0	13.962	46.061	0	43.374	128.547	4.439	73.169	28.044	0	5.381	71.192
NMCB3	0	144.189	10.526	5.84	104.584	106.489	52.158	92.657	564.133	0.32	0	218.394	287.913	587.101	32.26	13.366	205.581	26.745	2.157	6.518	68.97	142.722	62.646	60.348	12.721	0	0	0.383	18.041	48.519	0.085	41.982	139.379	4.569	78.922	28.691	0	6.873	82.21
NMCB5	8.226	157.85	14.999	5.833	109.192	113.389	53.222	106.413	564.883	0	0.319	228.198	309.973	610.619	33.534	13.816	214.614	29.089	1.595	5.139	70.377	150.179	65.644	63.308	13.513	0	0	0.174	20.706	50.328	0	50.584	148.6	4.682	81.384	29.581	0	6.6	81.223
NMCB7	6.086	166.805	21.038	5.76	105.204	128.86	48.354	150.085	511.728	0	0	231.791	311.456	593.111	33.803	13.304	210.643	29.794	1.672	7.289	69.634	148.596	62.35	63.799	12.52	1.248	0	0	21.385	49.957	0	60.001	172.349	4.503	81.001	29.546	0	5.237	119.479
NMP1	0	38.2	2.381	5.491	96.622	91.282	49.983	28.879	609.671	0	0.389	210.855	282.223	574.367	32.52	13.483	200.905	23.001	1.676	53.553	62.333	129.868	57.248	54.44	9.295	1.008	0	0	9.434	46.392	0	38.665	129.439	5.276	75.489	28.256	0	7.018	62.238
QAP0	0	47.196	2.004	10.644	155.128	116.587	50.086	46.411	574.328	1.459	1.078	188.696	289.27	534.062	37.003	27.037	253.587	24.672	1.525	20.421	58.946	126.013	55.904	54.395	5.79	1.373	0	0	8.029	51.485	0	56.915	189.131	7.062	71.246	43.65	0	5.511	95.946
QACB1	0	78.153	3.84	10.396	149.667	113.784	47.787	54.957	549.399	0.955	1.097	183.537	283.276	517.286	35.828	26.128	245.129	23.957	1.435	14.301	57.056	123.42	53.626	52.751	6.071	1.366	0.466	0	9.08	50.201	0	56.095	182.445	6.827	68.834	42.344	0	5.874	92.811
QACB2	0	134.883	7.779	10.606	152.838	125.385	48.753	68.536	554.511	0.637	1.142	192.481	297.432	530.079	36.343	26.769	250.678	26.858	1.529	15.19	60.807	131.325	55.446	56.125	7.243	1.419	0.445	0.274	12.01	53.146	0.161	58.568	208.296	6.94	71.741	43.091	0	5.705	143.04
QACB3	0	156.084	11.326	10.199	149.05	123.214	48.157	77.797	524.599	0.143	1.076	184.413	287.438	510.085	34.449	24.928	240.886	26.931	1.435	15.265	59.488	129.832	55.389	55.675	7.481	1.269	0.371	0.077	14.694	50.585	0.083	55.842	192.051	6.539	69.2	40.867	0	5.328	118.46
QACB5	0	188.243	16.584	10.316	154.536	128.38	49.834	95.022	518.661	0.941	1.068	187.212	295.621	518.146	34.446	25.096	244.938	28.521	1.37	14.284	61.923	135.824	57.208	57.811	8.113	1.317	0	0.019	19.517	51.246	0.08	57.982	187.542	6.62	70.057	40.738	0	5.354	99.88
QACB7	0	222.432	24.03	11.59	174.968	149.326	54.963	117.578	555.467	1.122	1.242	211.945	335.586	583.4	38.424	27.933	275.273	32.716	1.55	20.101	71.621	155.971	64.043	66.742	9.3	1.494	0	0.444	23.212	58.141	0	69.745	214.752	7.338	79.727	46.004	0	4.721	113.945
QAP1	0	47.886	2.626	10.906	156.427	118.495	50.171	49.472	578.222	0.523	1.147	191.93	296.56	542.679	37.636	27.53	257.502	24.998	1.543	21.917	59.734	128.081	57.362	55.272	5.878	1.449	0.453	0.07	8.337	52.121	0.114	58.049	192.23	7.161	72.541	44.339	0	7.088	97.429
QAP2	0	49.095	3.163	11.235	159.902	121.174	50.557	51.986	588.316	0.643	1.212	195.908	304.152	553.972	38.458	28.094	262.908	25.555	1.557	18.172	61.142	130.818	57.958	56.578	6.099	1.424	0.363	0	8.624	53.738	0	59.607	196.766	7.354	74.22	45.29	0	7.374	99.556
QAP3	0	48.689	3.741	10.985	155.526	118.591	48.442	53.291	566.873	0.663	1.144	190.748	302.915	539.196	37.456	27.314	255.662	24.923	1.508	17.452	59.407	127.126	57.018	55.103	5.913	1.533	0.443	0	8.614	52.366	0	58.56	191.213	7.175	72.278	43.937	0	7.438	96.341
QAP5	0	48.222	4.531	11.178	157.616	120.771	47.851	60.61	568.59	0.433	1.196	194.332	305.584	547.41	38.019	27.766	260.518	25.285	1.543	16.894	60.712	129.954	57.022	56.164	5.917	1.471	0.092	0.136	8.653	53.129	0	60.424	194.59	7.335	73.613	44.836	0	7.26	97.651
QAP7	0	46.489	5.493	10.792	153.606	127.212	44.967	61.912	541.727	0	1.106	187.32	301.386	531.279	40.385	26.632	251.103	24.414	1.48	18.13	58.911	125.392	55.24	54.191	5.796	1.432	0	0.072	8.491	51.438	0	59.084	188.14	7.07	73.338	43.343	0	6.407	94.856
Amino Acid	PSER	TAU2	ASP2	HYP2	THR2	SER2	ASN2	GLU2	GLN2	SAR	AAD	PRO2	GLY2	ALA2	CIT2	ABU	VAL2	MET2	ALLISO	CYS2	ILE2	LEU2	TYR2	PHE2	BALA2	BABA	GBA	HCY	ETN	TRP2	HYL	ORN2	LYS2	1MHIS	HIS2	3MHIS	ANSP	CARSN	ARG2
NMP2	0	38.759	3.466	5.684	96.246	91.435	47.994	47.817	576.044	0	0.415	210.756	270.91	571.115	32.105	13.38	199.333	23.136	1.581	7.13	62.874	129.441	59.156	54.281	9.29	0.777	0	0	10.645	45.909	0	39.869	127.485	4.618	74.836	28.468	0	9.624	66.225
NMP3	0	37.385	3.929	5.575	93.917	88.912	45.467	51.482	557.267	0.963	0	206.432	266.994	556.015	31.341	13.133	194.341	22.7	1.513	4.68	61.442	126.56	57.645	53.832	8.927	0	0	0	10.519	45.21	0	39.188	125.249	4.486	73.412	27.728	0	8.81	67.972
NMP5	0	38.672	5.34	5.814	97.148	98.682	45.868	62.429	560.574	0	0	215.552	280.612	576.652	32.319	13.495	200.774	23.705	1.583	6.157	63.025	130.175	59.798	57.038	9.683	1.192	0	0	11.12	46.282	0	42.27	136.013	4.754	76.793	28.723	0	9.226	81.779
NMP7	0	38.561	7.999	5.806	100.668	117.268	47.586	69.507	559.381	0.571	0	229.19	297.232	585.85	32.48	13.49	204.379	26.172	1.632	6.017	68.143	138.662	61.942	62.541	9.023	0.583	0	0	12.712	47.244	0.536	44.781	164.908	4.813	82.403	29.286	0	7.963	135.57
NMD0	0	37.157	1.727	5.375	96.665	90.776	50.237	0	611.77	0	0	208.737	273.854	572.272	25.13	13.347	199.511	22.745	1.651	43.258	61.527	128.064	56.598	53.627	0	0.979	0.309	0	8.591	46.167	0	37.283	127.97	5.214	75.308	27.915	0	5.569	61.829
NMCB1	0	60.629	4.034	5.572	95.53	94.264	48.35	0	597.232	0	0.313	210.16	277.395	570.226	45.781	13.428	199.223	22.774	1.639	54.719	60.884	129.182	55.646	53.968	0	0.979	0.391	0.096	9.764	47.558	0	40.619	128.362	5.203	75.055	28.724	0	5.564	64.538
NMCB2	0	100.957	7.963	5.729	93.029	98.999	45.409	107.82	523.247	0	0	208.545	267.065	559.083	31.952	13.014	195.405	23.287	1.522	4.474	60.558	129.245	56.778	54.721	10.383	0.388	0.228	0	13.962	46.061	0	43.374	128.547	4.439	73.169	28.044	0	5.381	71.192
NMCB3	0	144.189	10.526	5.84	104.584	106.489	52.158	92.657	564.133	0.32	0	218.394	287.913	587.101	32.26	13.366	205.581	26.745	2.157	6.518	68.97	142.722	62.646	60.348	12.721	0	0	0.383	18.041	48.519	0.085	41.982	139.379	4.569	78.922	28.691	0	6.873	82.21
NMCB5	8.226	157.85	14.999	5.833	109.192	113.389	53.222	106.413	564.883	0	0.319	228.198	309.973	610.619	33.534	13.816	214.614	29.089	1.595	5.139	70.377	150.179	65.644	63.308	13.513	0	0	0.174	20.706	50.328	0	50.584	148.6	4.682	81.384	29.581	0	6.6	81.223
NMCB7	6.086	166.805	21.038	5.76	105.204	128.86	48.354	150.085	511.728	0	0	231.791	311.456	593.111	33.803	13.304	210.643	29.794	1.672	7.289	69.634	148.596	62.35	63.799	12.52	1.248	0	0	21.385	49.957	0	60.001	172.349	4.503	81.001	29.546	0	5.237	119.479
NMP1	0	38.2	2.381	5.491	96.622	91.282	49.983	28.879	609.671	0	0.389	210.855	282.223	574.367	32.52	13.483	200.905	23.001	1.676	53.553	62.333	129.868	57.248	54.44	9.295	1.008	0	0	9.434	46.392	0	38.665	129.439	5.276	75.489	28.256	0	7.018	62.238
QAP0	0	47.196	2.004	10.644	155.128	116.587	50.086	46.411	574.328	1.459	1.078	188.696	289.27	534.062	37.003	27.037	253.587	24.672	1.525	20.421	58.946	126.013	55.904	54.395	5.79	1.373	0	0	8.029	51.485	0	56.915	189.131	7.062	71.246	43.65	0	5.511	95.946
QACB1	0	78.153	3.84	10.396	149.667	113.784	47.787	54.957	549.399	0.955	1.097	183.537	283.276	517.286	35.828	26.128	245.129	23.957	1.435	14.301	57.056	123.42	53.626	52.751	6.071	1.366	0.466	0	9.08	50.201	0	56.095	182.445	6.827	68.834	42.344	0	5.874	92.811
QACB2	0	134.883	7.779	10.606	152.838	125.385	48.753	68.536	554.511	0.637	1.142	192.481	297.432	530.079	36.343	26.769	250.678	26.858	1.529	15.19	60.807	131.325	55.446	56.125	7.243	1.419	0.445	0.274	12.01	53.146	0.161	58.568	208.296	6.94	71.741	43.091	0	5.705	143.04
QACB3	0	156.084	11.326	10.199	149.05	123.214	48.157	77.797	524.599	0.143	1.076	184.413	287.438	510.085	34.449	24.928	240.886	26.931	1.435	15.265	59.488	129.832	55.389	55.675	7.481	1.269	0.371	0.077	14.694	50.585	0.083	55.842	192.051	6.539	69.2	40.867	0	5.328	118.46
QACB5	0	188.243	16.584	10.316	154.536	128.38	49.834	95.022	518.661	0.941	1.068	187.212	295.621	518.146	34.446	25.096	244.938	28.521	1.37	14.284	61.923	135.824	57.208	57.811	8.113	1.317	0	0.019	19.517	51.246	0.08	57.982	187.542	6.62	70.057	40.738	0	5.354	99.88
QACB7	0	222.432	24.03	11.59	174.968	149.326	54.963	117.578	555.467	1.122	1.242	211.945	335.586	583.4	38.424	27.933	275.273	32.716	1.55	20.101	71.621	155.971	64.043	66.742	9.3	1.494	0	0.444	23.212	58.141	0	69.745	214.752	7.338	79.727	46.004	0	4.721	113.945
QAP1	0	47.886	2.626	10.906	156.427	118.495	50.171	49.472	578.222	0.523	1.147	191.93	296.56	542.679	37.636	27.53	257.502	24.998	1.543	21.917	59.734	128.081	57.362	55.272	5.878	1.449	0.453	0.07	8.337	52.121	0.114	58.049	192.23	7.161	72.541	44.339	0	7.088	97.429
QAP2	0	49.095	3.163	11.235	159.902	121.174	50.557	51.986	588.316	0.643	1.212	195.908	304.152	553.972	38.458	28.094	262.908	25.555	1.557	18.172	61.142	130.818	57.958	56.578	6.099	1.424	0.363	0	8.624	53.738	0	59.607	196.766	7.354	74.22	45.29	0	7.374	99.556
QAP3	0	48.689	3.741	10.985	155.526	118.591	48.442	53.291	566.873	0.663	1.144	190.748	302.915	539.196	37.456	27.314	255.662	24.923	1.508	17.452	59.407	127.126	57.018	55.103	5.913	1.533	0.443	0	8.614	52.366	0	58.56	191.213	7.175	72.278	43.937	0	7.438	96.341
QAP5	0	48.222	4.531	11.178	157.616	120.771	47.851	60.61	568.59	0.433	1.196	194.332	305.584	547.41	38.019	27.766	260.518	25.285	1.543	16.894	60.712	129.954	57.022	56.164	5.917	1.471	0.092	0.136	8.653	53.129	0	60.424	194.59	7.335	73.613	44.836	0	7.26	97.651
QAP7	0	46.489	5.493	10.792	153.606	127.212	44.967	61.912	541.727	0	1.106	187.32	301.386	531.279	40.385	26.632	251.103	24.414	1.48	18.13	58.911	125.392	55.24	54.191	5.796	1.432	0	0.072	8.491	51.438	0	59.084	188.14	7.07	73.338	43.343	0	6.407	94.856
Amino Acid	PSER	TAU2	ASP2	HYP2	THR2	SER2	ASN2	GLU2	GLN2	SAR	AAD	PRO2	GLY2	ALA2	CIT2	ABU	VAL2	MET2	ALLISO	CYS2	ILE2	LEU2	TYR2	PHE2	BALA2	BABA	GBA	HCY	ETN	TRP2	HYL	ORN2	LYS2	1MHIS	HIS2	3MHIS	ANSP	CARSN	ARG2
NMP2	0	38.759	3.466	5.684	96.246	91.435	47.994	47.817	576.044	0	0.415	210.756	270.91	571.115	32.105	13.38	199.333	23.136	1.581	7.13	62.874	129.441	59.156	54.281	9.29	0.777	0	0	10.645	45.909	0	39.869	127.485	4.618	74.836	28.468	0	9.624	66.225
NMP3	0	37.385	3.929	5.575	93.917	88.912	45.467	51.482	557.267	0.963	0	206.432	266.994	556.015	31.341	13.133	194.341	22.7	1.513	4.68	61.442	126.56	57.645	53.832	8.927	0	0	0	10.519	45.21	0	39.188	125.249	4.486	73.412	27.728	0	8.81	67.972
NMP5	0	38.672	5.34	5.814	97.148	98.682	45.868	62.429	560.574	0	0	215.552	280.612	576.652	32.319	13.495	200.774	23.705	1.583	6.157	63.025	130.175	59.798	57.038	9.683	1.192	0	0	11.12	46.282	0	42.27	136.013	4.754	76.793	28.723	0	9.226	81.779
NMP7	0	38.561	7.999	5.806	100.668	117.268	47.586	69.507	559.381	0.571	0	229.19	297.232	585.85	32.48	13.49	204.379	26.172	1.632	6.017	68.143	138.662	61.942	62.541	9.023	0.583	0	0	12.712	47.244	0.536	44.781	164.908	4.813	82.403	29.286	0	7.963	135.57
NMD0	0	37.157	1.727	5.375	96.665	90.776	50.237	0	611.77	0	0	208.737	273.854	572.272	25.13	13.347	199.511	22.745	1.651	43.258	61.527	128.064	56.598	53.627	0	0.979	0.309	0	8.591	46.167	0	37.283	127.97	5.214	75.308	27.915	0	5.569	61.829
NMCB1	0	60.629	4.034	5.572	95.53	94.264	48.35	0	597.232	0	0.313	210.16	277.395	570.226	45.781	13.428	199.223	22.774	1.639	54.719	60.884	129.182	55.646	53.968	0	0.979	0.391	0.096	9.764	47.558	0	40.619	128.362	5.203	75.055	28.724	0	5.564	64.538
NMCB2	0	100.957	7.963	5.729	93.029	98.999	45.409	107.82	523.247	0	0	208.545	267.065	559.083	31.952	13.014	195.405	23.287	1.522	4.474	60.558	129.245	56.778	54.721	10.383	0.388	0.228	0	13.962	46.061	0	43.374	128.547	4.439	73.169	28.044	0	5.381	71.192
NMCB3	0	144.189	10.526	5.84	104.584	106.489	52.158	92.657	564.133	0.32	0	218.394	287.913	587.101	32.26	13.366	205.581	26.745	2.157	6.518	68.97	142.722	62.646	60.348	12.721	0	0	0.383	18.041	48.519	0.085	41.982	139.379	4.569	78.922	28.691	0	6.873	82.21
NMCB5	8.226	157.85	14.999	5.833	109.192	113.389	53.222	106.413	564.883	0	0.319	228.198	309.973	610.619	33.534	13.816	214.614	29.089	1.595	5.139	70.377	150.179	65.644	63.308	13.513	0	0	0.174	20.706	50.328	0	50.584	148.6	4.682	81.384	29.581	0	6.6	81.223
NMCB7	6.086	166.805	21.038	5.76	105.204	128.86	48.354	150.085	511.728	0	0	231.791	311.456	593.111	33.803	13.304	210.643	29.794	1.672	7.289	69.634	148.596	62.35	63.799	12.52	1.248	0	0	21.385	49.957	0	60.001	172.349	4.503	81.001	29.546	0	5.237	119.479
NMP1	0	38.2	2.381	5.491	96.622	91.282	49.983	28.879	609.671	0	0.389	210.855	282.223	574.367	32.52	13.483	200.905	23.001	1.676	53.553	62.333	129.868	57.248	54.44	9.295	1.008	0	0	9.434	46.392	0	38.665	129.439	5.276	75.489	28.256	0	7.018	62.238
QAP0	0	47.196	2.004	10.644	155.128	116.587	50.086	46.411	574.328	1.459	1.078	188.696	289.27	534.062	37.003	27.037	253.587	24.672	1.525	20.421	58.946	126.013	55.904	54.395	5.79	1.373	0	0	8.029	51.485	0	56.915	189.131	7.062	71.246	43.65	0	5.511	95.946
QACB1	0	78.153	3.84	10.396	149.667	113.784	47.787	54.957	549.399	0.955	1.097	183.537	283.276	517.286	35.828	26.128	245.129	23.957	1.435	14.301	57.056	123.42	53.626	52.751	6.071	1.366	0.466	0	9.08	50.201	0	56.095	182.445	6.827	68.834	42.344	0	5.874	92.811
QACB2	0	134.883	7.779	10.606	152.838	125.385	48.753	68.536	554.511	0.637	1.142	192.481	297.432	530.079	36.343	26.769	250.678	26.858	1.529	15.19	60.807	131.325	55.446	56.125	7.243	1.419	0.445	0.274	12.01	53.146	0.161	58.568	208.296	6.94	71.741	43.091	0	5.705	143.04
QACB3	0	156.084	11.326	10.199	149.05	123.214	48.157	77.797	524.599	0.143	1.076	184.413	287.438	510.085	34.449	24.928	240.886	26.931	1.435	15.265	59.488	129.832	55.389	55.675	7.481	1.269	0.371	0.077	14.694	50.585	0.083	55.842	192.051	6.539	69.2	40.867	0	5.328	118.46
QACB5	0	188.243	16.584	10.316	154.536	128.38	49.834	95.022	518.661	0.941	1.068	187.212	295.621	518.146	34.446	25.096	244.938	28.521	1.37	14.284	61.923	135.824	57.208	57.811	8.113	1.317	0	0.019	19.517	51.246	0.08	57.982	187.542	6.62	70.057	40.738	0	5.354	99.88
QACB7	0	222.432	24.03	11.59	174.968	149.326	54.963	117.578	555.467	1.122	1.242	211.945	335.586	583.4	38.424	27.933	275.273	32.716	1.55	20.101	71.621	155.971	64.043	66.742	9.3	1.494	0	0.444	23.212	58.141	0	69.745	214.752	7.338	79.727	46.004	0	4.721	113.945
QAP1	0	47.886	2.626	10.906	156.427	118.495	50.171	49.472	578.222	0.523	1.147	191.93	296.56	542.679	37.636	27.53	257.502	24.998	1.543	21.917	59.734	128.081	57.362	55.272	5.878	1.449	0.453	0.07	8.337	52.121	0.114	58.049	192.23	7.161	72.541	44.339	0	7.088	97.429
QAP2	0	49.095	3.163	11.235	159.902	121.174	50.557	51.986	588.316	0.643	1.212	195.908	304.152	553.972	38.458	28.094	262.908	25.555	1.557	18.172	61.142	130.818	57.958	56.578	6.099	1.424	0.363	0	8.624	53.738	0	59.607	196.766	7.354	74.22	45.29	0	7.374	99.556
QAP3	0	48.689	3.741	10.985	155.526	118.591	48.442	53.291	566.873	0.663	1.144	190.748	302.915	539.196	37.456	27.314	255.662	24.923	1.508	17.452	59.407	127.126	57.018	55.103	5.913	1.533	0.443	0	8.614	52.366	0	58.56	191.213	7.175	72.278	43.937	0	7.438	96.341
QAP5	0	48.222	4.531	11.178	157.616	120.771	47.851	60.61	568.59	0.433	1.196	194.332	305.584	547.41	38.019	27.766	260.518	25.285	1.543	16.894	60.712	129.954	57.022	56.164	5.917	1.471	0.092	0.136	8.653	53.129	0	60.424	194.59	7.335	73.613	44.836	0	7.26	97.651
QAP7	0	46.489	5.493	10.792	153.606	127.212	44.967	61.912	541.727	0	1.106	187.32	301.386	531.279	40.385	26.632	251.103	24.414	1.48	18.13	58.911	125.392	55.24	54.191	5.796	1.432	0	0.072	8.491	51.438	0	59.084	188.14	7.07	73.338	43.343	0	6.407	94.856
Amino Acid	PSER	TAU2	ASP2	HYP2	THR2	SER2	ASN2	GLU2	GLN2	SAR	AAD	PRO2	GLY2	ALA2	CIT2	ABU	VAL2	MET2	ALLISO	CYS2	ILE2	LEU2	TYR2	PHE2	BALA2	BABA	GBA	HCY	ETN	TRP2	HYL	ORN2	LYS2	1MHIS	HIS2	3MHIS	ANSP	CARSN	ARG2
NMP2	0	38.759	3.466	5.684	96.246	91.435	47.994	47.817	576.044	0	0.415	210.756	270.91	571.115	32.105	13.38	199.333	23.136	1.581	7.13	62.874	129.441	59.156	54.281	9.29	0.777	0	0	10.645	45.909	0	39.869	127.485	4.618	74.836	28.468	0	9.624	66.225
NMP3	0	37.385	3.929	5.575	93.917	88.912	45.467	51.482	557.267	0.963	0	206.432	266.994	556.015	31.341	13.133	194.341	22.7	1.513	4.68	61.442	126.56	57.645	53.832	8.927	0	0	0	10.519	45.21	0	39.188	125.249	4.486	73.412	27.728	0	8.81	67.972
NMP5	0	38.672	5.34	5.814	97.148	98.682	45.868	62.429	560.574	0	0	215.552	280.612	576.652	32.319	13.495	200.774	23.705	1.583	6.157	63.025	130.175	59.798	57.038	9.683	1.192	0	0	11.12	46.282	0	42.27	136.013	4.754	76.793	28.723	0	9.226	81.779
NMP7	0	38.561	7.999	5.806	100.668	117.268	47.586	69.507	559.381	0.571	0	229.19	297.232	585.85	32.48	13.49	204.379	26.172	1.632	6.017	68.143	138.662	61.942	62.541	9.023	0.583	0	0	12.712	47.244	0.536	44.781	164.908	4.813	82.403	29.286	0	7.963	135.57
NMD0	0	37.157	1.727	5.375	96.665	90.776	50.237	0	611.77	0	0	208.737	273.854	572.272	25.13	13.347	199.511	22.745	1.651	43.258	61.527	128.064	56.598	53.627	0	0.979	0.309	0	8.591	46.167	0	37.283	127.97	5.214	75.308	27.915	0	5.569	61.829
NMCB1	0	60.629	4.034	5.572	95.53	94.264	48.35	0	597.232	0	0.313	210.16	277.395	570.226	45.781	13.428	199.223	22.774	1.639	54.719	60.884	129.182	55.646	53.968	0	0.979	0.391	0.096	9.764	47.558	0	40.619	128.362	5.203	75.055	28.724	0	5.564	64.538
NMCB2	0	100.957	7.963	5.729	93.029	98.999	45.409	107.82	523.247	0	0	208.545	267.065	559.083	31.952	13.014	195.405	23.287	1.522	4.474	60.558	129.245	56.778	54.721	10.383	0.388	0.228	0	13.962	46.061	0	43.374	128.547	4.439	73.169	28.044	0	5.381	71.192
NMCB3	0	144.189	10.526	5.84	104.584	106.489	52.158	92.657	564.133	0.32	0	218.394	287.913	587.101	32.26	13.366	205.581	26.745	2.157	6.518	68.97	142.722	62.646	60.348	12.721	0	0	0.383	18.041	48.519	0.085	41.982	139.379	4.569	78.922	28.691	0	6.873	82.21
NMCB5	8.226	157.85	14.999	5.833	109.192	113.389	53.222	106.413	564.883	0	0.319	228.198	309.973	610.619	33.534	13.816	214.614	29.089	1.595	5.139	70.377	150.179	65.644	63.308	13.513	0	0	0.174	20.706	50.328	0	50.584	148.6	4.682	81.384	29.581	0	6.6	81.223
NMCB7	6.086	166.805	21.038	5.76	105.204	128.86	48.354	150.085	511.728	0	0	231.791	311.456	593.111	33.803	13.304	210.643	29.794	1.672	7.289	69.634	148.596	62.35	63.799	12.52	1.248	0	0	21.385	49.957	0	60.001	172.349	4.503	81.001	29.546	0	5.237	119.479
NMP1	0	38.2	2.381	5.491	96.622	91.282	49.983	28.879	609.671	0	0.389	210.855	282.223	574.367	32.52	13.483	200.905	23.001	1.676	53.553	62.333	129.868	57.248	54.44	9.295	1.008	0	0	9.434	46.392	0	38.665	129.439	5.276	75.489	28.256	0	7.018	62.238
QAP0	0	47.196	2.004	10.644	155.128	116.587	50.086	46.411	574.328	1.459	1.078	188.696	289.27	534.062	37.003	27.037	253.587	24.672	1.525	20.421	58.946	126.013	55.904	54.395	5.79	1.373	0	0	8.029	51.485	0	56.915	189.131	7.062	71.246	43.65	0	5.511	95.946
QACB1	0	78.153	3.84	10.396	149.667	113.784	47.787	54.957	549.399	0.955	1.097	183.537	283.276	517.286	35.828	26.128	245.129	23.957	1.435	14.301	57.056	123.42	53.626	52.751	6.071	1.366	0.466	0	9.08	50.201	0	56.095	182.445	6.827	68.834	42.344	0	5.874	92.811
QACB2	0	134.883	7.779	10.606	152.838	125.385	48.753	68.536	554.511	0.637	1.142	192.481	297.432	530.079	36.343	26.769	250.678	26.858	1.529	15.19	60.807	131.325	55.446	56.125	7.243	1.419	0.445	0.274	12.01	53.146	0.161	58.568	208.296	6.94	71.741	43.091	0	5.705	143.04
QACB3	0	156.084	11.326	10.199	149.05	123.214	48.157	77.797	524.599	0.143	1.076	184.413	287.438	510.085	34.449	24.928	240.886	26.931	1.435	15.265	59.488	129.832	55.389	55.675	7.481	1.269	0.371	0.077	14.694	50.585	0.083	55.842	192.051	6.539	69.2	40.867	0	5.328	118.46
QACB5	0	188.243	16.584	10.316	154.536	128.38	49.834	95.022	518.661	0.941	1.068	187.212	295.621	518.146	34.446	25.096	244.938	28.521	1.37	14.284	61.923	135.824	57.208	57.811	8.113	1.317	0	0.019	19.517	51.246	0.08	57.982	187.542	6.62	70.057	40.738	0	5.354	99.88
QACB7	0	222.432	24.03	11.59	174.968	149.326	54.963	117.578	555.467	1.122	1.242	211.945	335.586	583.4	38.424	27.933	275.273	32.716	1.55	20.101	71.621	155.971	64.043	66.742	9.3	1.494	0	0.444	23.212	58.141	0	69.745	214.752	7.338	79.727	46.004	0	4.721	113.945
QAP1	0	47.886	2.626	10.906	156.427	118.495	50.171	49.472	578.222	0.523	1.147	191.93	296.56	542.679	37.636	27.53	257.502	24.998	1.543	21.917	59.734	128.081	57.362	55.272	5.878	1.449	0.453	0.07	8.337	52.121	0.114	58.049	192.23	7.161	72.541	44.339	0	7.088	97.429
QAP2	0	49.095	3.163	11.235	159.902	121.174	50.557	51.986	588.316	0.643	1.212	195.908	304.152	553.972	38.458	28.094	262.908	25.555	1.557	18.172	61.142	130.818	57.958	56.578	6.099	1.424	0.363	0	8.624	53.738	0	59.607	196.766	7.354	74.22	45.29	0	7.374	99.556
QAP3	0	48.689	3.741	10.985	155.526	118.591	48.442	53.291	566.873	0.663	1.144	190.748	302.915	539.196	37.456	27.314	255.662	24.923	1.508	17.452	59.407	127.126	57.018	55.103	5.913	1.533	0.443	0	8.614	52.366	0	58.56	191.213	7.175	72.278	43.937	0	7.438	96.341
QAP5	0	48.222	4.531	11.178	157.616	120.771	47.851	60.61	568.59	0.433	1.196	194.332	305.584	547.41	38.019	27.766	260.518	25.285	1.543	16.894	60.712	129.954	57.022	56.164	5.917	1.471	0.092	0.136	8.653	53.129	0	60.424	194.59	7.335	73.613	44.836	0	7.26	97.651
QAP7	0	46.489	5.493	10.792	153.606	127.212	44.967	61.912	541.727	0	1.106	187.32	301.386	531.279	40.385	26.632	251.103	24.414	1.48	18.13	58.911	125.392	55.24	54.191	5.796	1.432	0	0.072	8.491	51.438	0	59.084	188.14	7.07	73.338	43.343	0	6.407	94.856
Amino Acid	PSER	TAU2	ASP2	HYP2	THR2	SER2	ASN2	GLU2	GLN2	SAR	AAD	PRO2	GLY2	ALA2	CIT2	ABU	VAL2	MET2	ALLISO	CYS2	ILE2	LEU2	TYR2	PHE2	BALA2	BABA	GBA	HCY	ETN	TRP2	HYL	ORN2	LYS2	1MHIS	HIS2	3MHIS	ANSP	CARSN	ARG2
NMP2	0	38.759	3.466	5.684	96.246	91.435	47.994	47.817	576.044	0	0.415	210.756	270.91	571.115	32.105	13.38	199.333	23.136	1.581	7.13	62.874	129.441	59.156	54.281	9.29	0.777	0	0	10.645	45.909	0	39.869	127.485	4.618	74.836	28.468	0	9.624	66.225
NMP3	0	37.385	3.929	5.575	93.917	88.912	45.467	51.482	557.267	0.963	0	206.432	266.994	556.015	31.341	13.133	194.341	22.7	1.513	4.68	61.442	126.56	57.645	53.832	8.927	0	0	0	10.519	45.21	0	39.188	125.249	4.486	73.412	27.728	0	8.81	67.972
NMP5	0	38.672	5.34	5.814	97.148	98.682	45.868	62.429	560.574	0	0	215.552	280.612	576.652	32.319	13.495	200.774	23.705	1.583	6.157	63.025	130.175	59.798	57.038	9.683	1.192	0	0	11.12	46.282	0	42.27	136.013	4.754	76.793	28.723	0	9.226	81.779
NMP7	0	38.561	7.999	5.806	100.668	117.268	47.586	69.507	559.381	0.571	0	229.19	297.232	585.85	32.48	13.49	204.379	26.172	1.632	6.017	68.143	138.662	61.942	62.541	9.023	0.583	0	0	12.712	47.244	0.536	44.781	164.908	4.813	82.403	29.286	0	7.963	135.57
NMD0	0	37.157	1.727	5.375	96.665	90.776	50.237	0	611.77	0	0	208.737	273.854	572.272	25.13	13.347	199.511	22.745	1.651	43.258	61.527	128.064	56.598	53.627	0	0.979	0.309	0	8.591	46.167	0	37.283	127.97	5.214	75.308	27.915	0	5.569	61.829
NMCB1	0	60.629	4.034	5.572	95.53	94.264	48.35	0	597.232	0	0.313	210.16	277.395	570.226	45.781	13.428	199.223	22.774	1.639	54.719	60.884	129.182	55.646	53.968	0	0.979	0.391	0.096	9.764	47.558	0	40.619	128.362	5.203	75.055	28.724	0	5.564	64.538
NMCB2	0	100.957	7.963	5.729	93.029	98.999	45.409	107.82	523.247	0	0	208.545	267.065	559.083	31.952	13.014	195.405	23.287	1.522	4.474	60.558	129.245	56.778	54.721	10.383	0.388	0.228	0	13.962	46.061	0	43.374	128.547	4.439	73.169	28.044	0	5.381	71.192
NMCB3	0	144.189	10.526	5.84	104.584	106.489	52.158	92.657	564.133	0.32	0	218.394	287.913	587.101	32.26	13.366	205.581	26.745	2.157	6.518	68.97	142.722	62.646	60.348	12.721	0	0	0.383	18.041	48.519	0.085	41.982	139.379	4.569	78.922	28.691	0	6.873	82.21
NMCB5	8.226	157.85	14.999	5.833	109.192	113.389	53.222	106.413	564.883	0	0.319	228.198	309.973	610.619	33.534	13.816	214.614	29.089	1.595	5.139	70.377	150.179	65.644	63.308	13.513	0	0	0.174	20.706	50.328	0	50.584	148.6	4.682	81.384	29.581	0	6.6	81.223
NMCB7	6.086	166.805	21.038	5.76	105.204	128.86	48.354	150.085	511.728	0	0	231.791	311.456	593.111	33.803	13.304	210.643	29.794	1.672	7.289	69.634	148.596	62.35	63.799	12.52	1.248	0	0	21.385	49.957	0	60.001	172.349	4.503	81.001	29.546	0	5.237	119.479
NMP1	0	38.2	2.381	5.491	96.622	91.282	49.983	28.879	609.671	0	0.389	210.855	282.223	574.367	32.52	13.483	200.905	23.001	1.676	53.553	62.333	129.868	57.248	54.44	9.295	1.008	0	0	9.434	46.392	0	38.665	129.439	5.276	75.489	28.256	0	7.018	62.238
QAP0	0	47.196	2.004	10.644	155.128	116.587	50.086	46.411	574.328	1.459	1.078	188.696	289.27	534.062	37.003	27.037	253.587	24.672	1.525	20.421	58.946	126.013	55.904	54.395	5.79	1.373	0	0	8.029	51.485	0	56.915	189.131	7.062	71.246	43.65	0	5.511	95.946
QACB1	0	78.153	3.84	10.396	149.667	113.784	47.787	54.957	549.399	0.955	1.097	183.537	283.276	517.286	35.828	26.128	245.129	23.957	1.435	14.301	57.056	123.42	53.626	52.751	6.071	1.366	0.466	0	9.08	50.201	0	56.095	182.445	6.827	68.834	42.344	0	5.874	92.811
QACB2	0	134.883	7.779	10.606	152.838	125.385	48.753	68.536	554.511	0.637	1.142	192.481	297.432	530.079	36.343	26.769	250.678	26.858	1.529	15.19	60.807	131.325	55.446	56.125	7.243	1.419	0.445	0.274	12.01	53.146	0.161	58.568	208.296	6.94	71.741	43.091	0	5.705	143.04
QACB3	0	156.084	11.326	10.199	149.05	123.214	48.157	77.797	524.599	0.143	1.076	184.413	287.438	510.085	34.449	24.928	240.886	26.931	1.435	15.265	59.488	129.832	55.389	55.675	7.481	1.269	0.371	0.077	14.694	50.585	0.083	55.842	192.051	6.539	69.2	40.867	0	5.328	118.46
QACB5	0	188.243	16.584	10.316	154.536	128.38	49.834	95.022	518.661	0.941	1.068	187.212	295.621	518.146	34.446	25.096	244.938	28.521	1.37	14.284	61.923	135.824	57.208	57.811	8.113	1.317	0	0.019	19.517	51.246	0.08	57.982	187.542	6.62	70.057	40.738	0	5.354	99.88
QACB7	0	222.432	24.03	11.59	174.968	149.326	54.963	117.578	555.467	1.122	1.242	211.945	335.586	583.4	38.424	27.933	275.273	32.716	1.55	20.101	71.621	155.971	64.043	66.742	9.3	1.494	0	0.444	23.212	58.141	0	69.745	214.752	7.338	79.727	46.004	0	4.721	113.945
QAP1	0	47.886	2.626	10.906	156.427	118.495	50.171	49.472	578.222	0.523	1.147	191.93	296.56	542.679	37.636	27.53	257.502	24.998	1.543	21.917	59.734	128.081	57.362	55.272	5.878	1.449	0.453	0.07	8.337	52.121	0.114	58.049	192.23	7.161	72.541	44.339	0	7.088	97.429
QAP2	0	49.095	3.163	11.235	159.902	121.174	50.557	51.986	588.316	0.643	1.212	195.908	304.152	553.972	38.458	28.094	262.908	25.555	1.557	18.172	61.142	130.818	57.958	56.578	6.099	1.424	0.363	0	8.624	53.738	0	59.607	196.766	7.354	74.22	45.29	0	7.374	99.556
QAP3	0	48.689	3.741	10.985	155.526	118.591	48.442	53.291	566.873	0.663	1.144	190.748	302.915	539.196	37.456	27.314	255.662	24.923	1.508	17.452	59.407	127.126	57.018	55.103	5.913	1.533	0.443	0	8.614	52.366	0	58.56	191.213	7.175	72.278	43.937	0	7.438	96.341
QAP5	0	48.222	4.531	11.178	157.616	120.771	47.851	60.61	568.59	0.433	1.196	194.332	305.584	547.41	38.019	27.766	260.518	25.285	1.543	16.894	60.712	129.954	57.022	56.164	5.917	1.471	0.092	0.136	8.653	53.129	0	60.424	194.59	7.335	73.613	44.836	0	7.26	97.651
QAP7	0	46.489	5.493	10.792	153.606	127.212	44.967	61.912	541.727	0	1.106	187.32	301.386	531.279	40.385	26.632	251.103	24.414	1.48	18.13	58.911	125.392	55.24	54.191	5.796	1.432	0	0.072	8.491	51.438	0	59.084	188.14	7.07	73.338	43.343	0	6.407	94.856
Amino Acid	PSER	TAU2	ASP2	HYP2	THR2	SER2	ASN2	GLU2	GLN2	SAR	AAD	PRO2	GLY2	ALA2	CIT2	ABU	VAL2	MET2	ALLISO	CYS2	ILE2	LEU2	TYR2	PHE2	BALA2	BABA	GBA	HCY	ETN	TRP2	HYL	ORN2	LYS2	1MHIS	HIS2	3MHIS	ANSP	CARSN	ARG2
NMP2	0	38.759	3.466	5.684	96.246	91.435	47.994	47.817	576.044	0	0.415	210.756	270.91	571.115	32.105	13.38	199.333	23.136	1.581	7.13	62.874	129.441	59.156	54.281	9.29	0.777	0	0	10.645	45.909	0	39.869	127.485	4.618	74.836	28.468	0	9.624	66.225
NMP3	0	37.385	3.929	5.575	93.917	88.912	45.467	51.482	557.267	0.963	0	206.432	266.994	556.015	31.341	13.133	194.341	22.7	1.513	4.68	61.442	126.56	57.645	53.832	8.927	0	0	0	10.519	45.21	0	39.188	125.249	4.486	73.412	27.728	0	8.81	67.972
NMP5	0	38.672	5.34	5.814	97.148	98.682	45.868	62.429	560.574	0	0	215.552	280.612	576.652	32.319	13.495	200.774	23.705	1.583	6.157	63.025	130.175	59.798	57.038	9.683	1.192	0	0	11.12	46.282	0	42.27	136.013	4.754	76.793	28.723	0	9.226	81.779
NMP7	0	38.561	7.999	5.806	100.668	117.268	47.586	69.507	559.381	0.571	0	229.19	297.232	585.85	32.48	13.49	204.379	26.172	1.632	6.017	68.143	138.662	61.942	62.541	9.023	0.583	0	0	12.712	47.244	0.536	44.781	164.908	4.813	82.403	29.286	0	7.963	135.57
NMD0	0	37.157	1.727	5.375	96.665	90.776	50.237	0	611.77	0	0	208.737	273.854	572.272	25.13	13.347	199.511	22.745	1.651	43.258	61.527	128.064	56.598	53.627	0	0.979	0.309	0	8.591	46.167	0	37.283	127.97	5.214	75.308	27.915	0	5.569	61.829
NMCB1	0	60.629	4.034	5.572	95.53	94.264	48.35	0	597.232	0	0.313	210.16	277.395	570.226	45.781	13.428	199.223	22.774	1.639	54.719	60.884	129.182	55.646	53.968	0	0.979	0.391	0.096	9.764	47.558	0	40.619	128.362	5.203	75.055	28.724	0	5.564	64.538
NMCB2	0	100.957	7.963	5.729	93.029	98.999	45.409	107.82	523.247	0	0	208.545	267.065	559.083	31.952	13.014	195.405	23.287	1.522	4.474	60.558	129.245	56.778	54.721	10.383	0.388	0.228	0	13.962	46.061	0	43.374	128.547	4.439	73.169	28.044	0	5.381	71.192
NMCB3	0	144.189	10.526	5.84	104.584	106.489	52.158	92.657	564.133	0.32	0	218.394	287.913	587.101	32.26	13.366	205.581	26.745	2.157	6.518	68.97	142.722	62.646	60.348	12.721	0	0	0.383	18.041	48.519	0.085	41.982	139.379	4.569	78.922	28.691	0	6.873	82.21
NMCB5	8.226	157.85	14.999	5.833	109.192	113.389	53.222	106.413	564.883	0	0.319	228.198	309.973	610.619	33.534	13.816	214.614	29.089	1.595	5.139	70.377	150.179	65.644	63.308	13.513	0	0	0.174	20.706	50.328	0	50.584	148.6	4.682	81.384	29.581	0	6.6	81.223
NMCB7	6.086	166.805	21.038	5.76	105.204	128.86	48.354	150.085	511.728	0	0	231.791	311.456	593.111	33.803	13.304	210.643	29.794	1.672	7.289	69.634	148.596	62.35	63.799	12.52	1.248	0	0	21.385	49.957	0	60.001	172.349	4.503	81.001	29.546	0	5.237	119.479
NMP1	0	38.2	2.381	5.491	96.622	91.282	49.983	28.879	609.671	0	0.389	210.855	282.223	574.367	32.52	13.483	200.905	23.001	1.676	53.553	62.333	129.868	57.248	54.44	9.295	1.008	0	0	9.434	46.392	0	38.665	129.439	5.276	75.489	28.256	0	7.018	62.238
QAP0	0	47.196	2.004	10.644	155.128	116.587	50.086	46.411	574.328	1.459	1.078	188.696	289.27	534.062	37.003	27.037	253.587	24.672	1.525	20.421	58.946	126.013	55.904	54.395	5.79	1.373	0	0	8.029	51.485	0	56.915	189.131	7.062	71.246	43.65	0	5.511	95.946
QACB1	0	78.153	3.84	10.396	149.667	113.784	47.787	54.957	549.399	0.955	1.097	183.537	283.276	517.286	35.828	26.128	245.129	23.957	1.435	14.301	57.056	123.42	53.626	52.751	6.071	1.366	0.466	0	9.08	50.201	0	56.095	182.445	6.827	68.834	42.344	0	5.874	92.811
QACB2	0	134.883	7.779	10.606	152.838	125.385	48.753	68.536	554.511	0.637	1.142	192.481	297.432	530.079	36.343	26.769	250.678	26.858	1.529	15.19	60.807	131.325	55.446	56.125	7.243	1.419	0.445	0.274	12.01	53.146	0.161	58.568	208.296	6.94	71.741	43.091	0	5.705	143.04
QACB3	0	156.084	11.326	10.199	149.05	123.214	48.157	77.797	524.599	0.143	1.076	184.413	287.438	510.085	34.449	24.928	240.886	26.931	1.435	15.265	59.488	129.832	55.389	55.675	7.481	1.269	0.371	0.077	14.694	50.585	0.083	55.842	192.051	6.539	69.2	40.867	0	5.328	118.46
QACB5	0	188.243	16.584	10.316	154.536	128.38	49.834	95.022	518.661	0.941	1.068	187.212	295.621	518.146	34.446	25.096	244.938	28.521	1.37	14.284	61.923	135.824	57.208	57.811	8.113	1.317	0	0.019	19.517	51.246	0.08	57.982	187.542	6.62	70.057	40.738	0	5.354	99.88
QACB7	0	222.432	24.03	11.59	174.968	149.326	54.963	117.578	555.467	1.122	1.242	211.945	335.586	583.4	38.424	27.933	275.273	32.716	1.55	20.101	71.621	155.971	64.043	66.742	9.3	1.494	0	0.444	23.212	58.141	0	69.745	214.752	7.338	79.727	46.004	0	4.721	113.945
QAP1	0	47.886	2.626	10.906	156.427	118.495	50.171	49.472	578.222	0.523	1.147	191.93	296.56	542.679	37.636	27.53	257.502	24.998	1.543	21.917	59.734	128.081	57.362	55.272	5.878	1.449	0.453	0.07	8.337	52.121	0.114	58.049	192.23	7.161	72.541	44.339	0	7.088	97.429
QAP2	0	49.095	3.163	11.235	159.902	121.174	50.557	51.986	588.316	0.643	1.212	195.908	304.152	553.972	38.458	28.094	262.908	25.555	1.557	18.172	61.142	130.818	57.958	56.578	6.099	1.424	0.363	0	8.624	53.738	0	59.607	196.766	7.354	74.22	45.29	0	7.374	99.556
QAP3	0	48.689	3.741	10.985	155.526	118.591	48.442	53.291	566.873	0.663	1.144	190.748	302.915	539.196	37.456	27.314	255.662	24.923	1.508	17.452	59.407	127.126	57.018	55.103	5.913	1.533	0.443	0	8.614	52.366	0	58.56	191.213	7.175	72.278	43.937	0	7.438	96.341
QAP5	0	48.222	4.531	11.178	157.616	120.771	47.851	60.61	568.59	0.433	1.196	194.332	305.584	547.41	38.019	27.766	260.518	25.285	1.543	16.894	60.712	129.954	57.022	56.164	5.917	1.471	0.092	0.136	8.653	53.129	0	60.424	194.59	7.335	73.613	44.836	0	7.26	97.651
QAP7	0	46.489	5.493	10.792	153.606	127.212	44.967	61.912	541.727	0	1.106	187.32	301.386	531.279	40.385	26.632	251.103	24.414	1.48	18.13	58.911	125.392	55.24	54.191	5.796	1.432	0	0.072	8.491	51.438	0	59.084	188.14	7.07	73.338	43.343	0	6.407	94.856
Amino Acid	PSER	TAU2	ASP2	HYP2	THR2	SER2	ASN2	GLU2	GLN2	SAR	AAD	PRO2	GLY2	ALA2	CIT2	ABU	VAL2	MET2	ALLISO	CYS2	ILE2	LEU2	TYR2	PHE2	BALA2	BABA	GBA	HCY	ETN	TRP2	HYL	ORN2	LYS2	1MHIS	HIS2	3MHIS	ANSP	CARSN	ARG2
NMP2	0	38.759	3.466	5.684	96.246	91.435	47.994	47.817	576.044	0	0.415	210.756	270.91	571.115	32.105	13.38	199.333	23.136	1.581	7.13	62.874	129.441	59.156	54.281	9.29	0.777	0	0	10.645	45.909	0	39.869	127.485	4.618	74.836	28.468	0	9.624	66.225
NMP3	0	37.385	3.929	5.575	93.917	88.912	45.467	51.482	557.267	0.963	0	206.432	266.994	556.015	31.341	13.133	194.341	22.7	1.513	4.68	61.442	126.56	57.645	53.832	8.927	0	0	0	10.519	45.21	0	39.188	125.249	4.486	73.412	27.728	0	8.81	67.972
NMP5	0	38.672	5.34	5.814	97.148	98.682	45.868	62.429	560.574	0	0	215.552	280.612	576.652	32.319	13.495	200.774	23.705	1.583	6.157	63.025	130.175	59.798	57.038	9.683	1.192	0	0	11.12	46.282	0	42.27	136.013	4.754	76.793	28.723	0	9.226	81.779
NMP7	0	38.561	7.999	5.806	100.668	117.268	47.586	69.507	559.381	0.571	0	229.19	297.232	585.85	32.48	13.49	204.379	26.172	1.632	6.017	68.143	138.662	61.942	62.541	9.023	0.583	0	0	12.712	47.244	0.536	44.781	164.908	4.813	82.403	29.286	0	7.963	135.57
NMD0	0	37.157	1.727	5.375	96.665	90.776	50.237	0	611.77	0	0	208.737	273.854	572.272	25.13	13.347	199.511	22.745	1.651	43.258	61.527	128.064	56.598	53.627	0	0.979	0.309	0	8.591	46.167	0	37.283	127.97	5.214	75.308	27.915	0	5.569	61.829
NMCB1	0	60.629	4.034	5.572	95.53	94.264	48.35	0	597.232	0	0.313	210.16	277.395	570.226	45.781	13.428	199.223	22.774	1.639	54.719	60.884	129.182	55.646	53.968	0	0.979	0.391	0.096	9.764	47.558	0	40.619	128.362	5.203	75.055	28.724	0	5.564	64.538
NMCB2	0	100.957	7.963	5.729	93.029	98.999	45.409	107.82	523.247	0	0	208.545	267.065	559.083	31.952	13.014	195.405	23.287	1.522	4.474	60.558	129.245	56.778	54.721	10.383	0.388	0.228	0	13.962	46.061	0	43.374	128.547	4.439	73.169	28.044	0	5.381	71.192
NMCB3	0	144.189	10.526	5.84	104.584	106.489	52.158	92.657	564.133	0.32	0	218.394	287.913	587.101	32.26	13.366	205.581	26.745	2.157	6.518	68.97	142.722	62.646	60.348	12.721	0	0	0.383	18.041	48.519	0.085	41.982	139.379	4.569	78.922	28.691	0	6.873	82.21
NMCB5	8.226	157.85	14.999	5.833	109.192	113.389	53.222	106.413	564.883	0	0.319	228.198	309.973	610.619	33.534	13.816	214.614	29.089	1.595	5.139	70.377	150.179	65.644	63.308	13.513	0	0	0.174	20.706	50.328	0	50.584	148.6	4.682	81.384	29.581	0	6.6	81.223
NMCB7	6.086	166.805	21.038	5.76	105.204	128.86	48.354	150.085	511.728	0	0	231.791	311.456	593.111	33.803	13.304	210.643	29.794	1.672	7.289	69.634	148.596	62.35	63.799	12.52	1.248	0	0	21.385	49.957	0	60.001	172.349	4.503	81.001	29.546	0	5.237	119.479
NMP1	0	38.2	2.381	5.491	96.622	91.282	49.983	28.879	609.671	0	0.389	210.855	282.223	574.367	32.52	13.483	200.905	23.001	1.676	53.553	62.333	129.868	57.248	54.44	9.295	1.008	0	0	9.434	46.392	0	38.665	129.439	5.276	75.489	28.256	0	7.018	62.238
QAP0	0	47.196	2.004	10.644	155.128	116.587	50.086	46.411	574.328	1.459	1.078	188.696	289.27	534.062	37.003	27.037	253.587	24.672	1.525	20.421	58.946	126.013	55.904	54.395	5.79	1.373	0	0	8.029	51.485	0	56.915	189.131	7.062	71.246	43.65	0	5.511	95.946
QACB1	0	78.153	3.84	10.396	149.667	113.784	47.787	54.957	549.399	0.955	1.097	183.537	283.276	517.286	35.828	26.128	245.129	23.957	1.435	14.301	57.056	123.42	53.626	52.751	6.071	1.366	0.466	0	9.08	50.201	0	56.095	182.445	6.827	68.834	42.344	0	5.874	92.811
QACB2	0	134.883	7.779	10.606	152.838	125.385	48.753	68.536	554.511	0.637	1.142	192.481	297.432	530.079	36.343	26.769	250.678	26.858	1.529	15.19	60.807	131.325	55.446	56.125	7.243	1.419	0.445	0.274	12.01	53.146	0.161	58.568	208.296	6.94	71.741	43.091	0	5.705	143.04
QACB3	0	156.084	11.326	10.199	149.05	123.214	48.157	77.797	524.599	0.143	1.076	184.413	287.438	510.085	34.449	24.928	240.886	26.931	1.435	15.265	59.488	129.832	55.389	55.675	7.481	1.269	0.371	0.077	14.694	50.585	0.083	55.842	192.051	6.539	69.2	40.867	0	5.328	118.46
QACB5	0	188.243	16.584	10.316	154.536	128.38	49.834	95.022	518.661	0.941	1.068	187.212	295.621	518.146	34.446	25.096	244.938	28.521	1.37	14.284	61.923	135.824	57.208	57.811	8.113	1.317	0	0.019	19.517	51.246	0.08	57.982	187.542	6.62	70.057	40.738	0	5.354	99.88
QACB7	0	222.432	24.03	11.59	174.968	149.326	54.963	117.578	555.467	1.122	1.242	211.945	335.586	583.4	38.424	27.933	275.273	32.716	1.55	20.101	71.621	155.971	64.043	66.742	9.3	1.494	0	0.444	23.212	58.141	0	69.745	214.752	7.338	79.727	46.004	0	4.721	113.945
QAP1	0	47.886	2.626	10.906	156.427	118.495	50.171	49.472	578.222	0.523	1.147	191.93	296.56	542.679	37.636	27.53	257.502	24.998	1.543	21.917	59.734	128.081	57.362	55.272	5.878	1.449	0.453	0.07	8.337	52.121	0.114	58.049	192.23	7.161	72.541	44.339	0	7.088	97.429
QAP2	0	49.095	3.163	11.235	159.902	121.174	50.557	51.986	588.316	0.643	1.212	195.908	304.152	553.972	38.458	28.094	262.908	25.555	1.557	18.172	61.142	130.818	57.958	56.578	6.099	1.424	0.363	0	8.624	53.738	0	59.607	196.766	7.354	74.22	45.29	0	7.374	99.556
QAP3	0	48.689	3.741	10.985	155.526	118.591	48.442	53.291	566.873	0.663	1.144	190.748	302.915	539.196	37.456	27.314	255.662	24.923	1.508	17.452	59.407	127.126	57.018	55.103	5.913	1.533	0.443	0	8.614	52.366	0	58.56	191.213	7.175	72.278	43.937	0	7.438	96.341
QAP5	0	48.222	4.531	11.178	157.616	120.771	47.851	60.61	568.59	0.433	1.196	194.332	305.584	547.41	38.019	27.766	260.518	25.285	1.543	16.894	60.712	129.954	57.022	56.164	5.917	1.471	0.092	0.136	8.653	53.129	0	60.424	194.59	7.335	73.613	44.836	0	7.26	97.651
QAP7	0	46.489	5.493	10.792	153.606	127.212	44.967	61.912	541.727	0	1.106	187.32	301.386	531.279	40.385	26.632	251.103	24.414	1.48	18.13	58.911	125.392	55.24	54.191	5.796	1.432	0	0.072	8.491	51.438	0	59.084	188.14	7.07	73.338	43.343	0	6.407	94.856
Amino Acid	PSER	TAU2	ASP2	HYP2	THR2	SER2	ASN2	GLU2	GLN2	SAR	AAD	PRO2	GLY2	ALA2	CIT2	ABU	VAL2	MET2	ALLISO	CYS2	ILE2	LEU2	TYR2	PHE2	BALA2	BABA	GBA	HCY	ETN	TRP2	HYL	ORN2	LYS2	1MHIS	HIS2	3MHIS	ANSP	CARSN	ARG2
NMP2	0	38.759	3.466	5.684	96.246	91.435	47.994	47.817	576.044	0	0.415	210.756	270.91	571.115	32.105	13.38	199.333	23.136	1.581	7.13	62.874	129.441	59.156	54.281	9.29	0.777	0	0	10.645	45.909	0	39.869	127.485	4.618	74.836	28.468	0	9.624	66.225
NMP3	0	37.385	3.929	5.575	93.917	88.912	45.467	51.482	557.267	0.963	0	206.432	266.994	556.015	31.341	13.133	194.341	22.7	1.513	4.68	61.442	126.56	57.645	53.832	8.927	0	0	0	10.519	45.21	0	39.188	125.249	4.486	73.412	27.728	0	8.81	67.972
NMP5	0	38.672	5.34	5.814	97.148	98.682	45.868	62.429	560.574	0	0	215.552	280.612	576.652	32.319	13.495	200.774	23.705	1.583	6.157	63.025	130.175	59.798	57.038	9.683	1.192	0	0	11.12	46.282	0	42.27	136.013	4.754	76.793	28.723	0	9.226	81.779
NMP7	0	38.561	7.999	5.806	100.668	117.268	47.586	69.507	559.381	0.571	0	229.19	297.232	585.85	32.48	13.49	204.379	26.172	1.632	6.017	68.143	138.662	61.942	62.541	9.023	0.583	0	0	12.712	47.244	0.536	44.781	164.908	4.813	82.403	29.286	0	7.963	135.57
NMD0	0	37.157	1.727	5.375	96.665	90.776	50.237	0	611.77	0	0	208.737	273.854	572.272	25.13	13.347	199.511	22.745	1.651	43.258	61.527	128.064	56.598	53.627	0	0.979	0.309	0	8.591	46.167	0	37.283	127.97	5.214	75.308	27.915	0	5.569	61.829
NMCB1	0	60.629	4.034	5.572	95.53	94.264	48.35	0	597.232	0	0.313	210.16	277.395	570.226	45.781	13.428	199.223	22.774	1.639	54.719	60.884	129.182	55.646	53.968	0	0.979	0.391	0.096	9.764	47.558	0	40.619	128.362	5.203	75.055	28.724	0	5.564	64.538
NMCB2	0	100.957	7.963	5.729	93.029	98.999	45.409	107.82	523.247	0	0	208.545	267.065	559.083	31.952	13.014	195.405	23.287	1.522	4.474	60.558	129.245	56.778	54.721	10.383	0.388	0.228	0	13.962	46.061	0	43.374	128.547	4.439	73.169	28.044	0	5.381	71.192
NMCB3	0	144.189	10.526	5.84	104.584	106.489	52.158	92.657	564.133	0.32	0	218.394	287.913	587.101	32.26	13.366	205.581	26.745	2.157	6.518	68.97	142.722	62.646	60.348	12.721	0	0	0.383	18.041	48.519	0.085	41.982	139.379	4.569	78.922	28.691	0	6.873	82.21
NMCB5	8.226	157.85	14.999	5.833	109.192	113.389	53.222	106.413	564.883	0	0.319	228.198	309.973	610.619	33.534	13.816	214.614	29.089	1.595	5.139	70.377	150.179	65.644	63.308	13.513	0	0	0.174	20.706	50.328	0	50.584	148.6	4.682	81.384	29.581	0	6.6	81.223
NMCB7	6.086	166.805	21.038	5.76	105.204	128.86	48.354	150.085	511.728	0	0	231.791	311.456	593.111	33.803	13.304	210.643	29.794	1.672	7.289	69.634	148.596	62.35	63.799	12.52	1.248	0	0	21.385	49.957	0	60.001	172.349	4.503	81.001	29.546	0	5.237	119.479
NMP1	0	38.2	2.381	5.491	96.622	91.282	49.983	28.879	609.671	0	0.389	210.855	282.223	574.367	32.52	13.483	200.905	23.001	1.676	53.553	62.333	129.868	57.248	54.44	9.295	1.008	0	0	9.434	46.392	0	38.665	129.439	5.276	75.489	28.256	0	7.018	62.238
QAP0	0	47.196	2.004	10.644	155.128	116.587	50.086	46.411	574.328	1.459	1.078	188.696	289.27	534.062	37.003	27.037	253.587	24.672	1.525	20.421	58.946	126.013	55.904	54.395	5.79	1.373	0	0	8.029	51.485	0	56.915	189.131	7.062	71.246	43.65	0	5.511	95.946
QACB1	0	78.153	3.84	10.396	149.667	113.784	47.787	54.957	549.399	0.955	1.097	183.537	283.276	517.286	35.828	26.128	245.129	23.957	1.435	14.301	57.056	123.42	53.626	52.751	6.071	1.366	0.466	0	9.08	50.201	0	56.095	182.445	6.827	68.834	42.344	0	5.874	92.811
QACB2	0	134.883	7.779	10.606	152.838	125.385	48.753	68.536	554.511	0.637	1.142	192.481	297.432	530.079	36.343	26.769	250.678	26.858	1.529	15.19	60.807	131.325	55.446	56.125	7.243	1.419	0.445	0.274	12.01	53.146	0.161	58.568	208.296	6.94	71.741	43.091	0	5.705	143.04
QACB3	0	156.084	11.326	10.199	149.05	123.214	48.157	77.797	524.599	0.143	1.076	184.413	287.438	510.085	34.449	24.928	240.886	26.931	1.435	15.265	59.488	129.832	55.389	55.675	7.481	1.269	0.371	0.077	14.694	50.585	0.083	55.842	192.051	6.539	69.2	40.867	0	5.328	118.46
QACB5	0	188.243	16.584	10.316	154.536	128.38	49.834	95.022	518.661	0.941	1.068	187.212	295.621	518.146	34.446	25.096	244.938	28.521	1.37	14.284	61.923	135.824	57.208	57.811	8.113	1.317	0	0.019	19.517	51.246	0.08	57.982	187.542	6.62	70.057	40.738	0	5.354	99.88
QACB7	0	222.432	24.03	11.59	174.968	149.326	54.963	117.578	555.467	1.122	1.242	211.945	335.586	583.4	38.424	27.933	275.273	32.716	1.55	20.101	71.621	155.971	64.043	66.742	9.3	1.494	0	0.444	23.212	58.141	0	69.745	214.752	7.338	79.727	46.004	0	4.721	113.945
QAP1	0	47.886	2.626	10.906	156.427	118.495	50.171	49.472	578.222	0.523	1.147	191.93	296.56	542.679	37.636	27.53	257.502	24.998	1.543	21.917	59.734	128.081	57.362	55.272	5.878	1.449	0.453	0.07	8.337	52.121	0.114	58.049	192.23	7.161	72.541	44.339	0	7.088	97.429
QAP2	0	49.095	3.163	11.235	159.902	121.174	50.557	51.986	588.316	0.643	1.212	195.908	304.152	553.972	38.458	28.094	262.908	25.555	1.557	18.172	61.142	130.818	57.958	56.578	6.099	1.424	0.363	0	8.624	53.738	0	59.607	196.766	7.354	74.22	45.29	0	7.374	99.556
QAP3	0	48.689	3.741	10.985	155.526	118.591	48.442	53.291	566.873	0.663	1.144	190.748	302.915	539.196	37.456	27.314	255.662	24.923	1.508	17.452	59.407	127.126	57.018	55.103	5.913	1.533	0.443	0	8.614	52.366	0	58.56	191.213	7.175	72.278	43.937	0	7.438	96.341
QAP5	0	48.222	4.531	11.178	157.616	120.771	47.851	60.61	568.59	0.433	1.196	194.332	305.584	547.41	38.019	27.766	260.518	25.285	1.543	16.894	60.712	129.954	57.022	56.164	5.917	1.471	0.092	0.136	8.653	53.129	0	60.424	194.59	7.335	73.613	44.836	0	7.26	97.651
QAP7	0	46.489	5.493	10.792	153.606	127.212	44.967	61.912	541.727	0	1.106	187.32	301.386	531.279	40.385	26.632	251.103	24.414	1.48	18.13	58.911	125.392	55.24	54.191	5.796	1.432	0	0.072	8.491	51.438	0	59.084	188.14	7.07	73.338	43.343	0	6.407	94.856
Amino Acid	PSER	TAU2	ASP2	HYP2	THR2	SER2	ASN2	GLU2	GLN2	SAR	AAD	PRO2	GLY2	ALA2	CIT2	ABU	VAL2	MET2	ALLISO	CYS2	ILE2	LEU2	TYR2	PHE2	BALA2	BABA	GBA	HCY	ETN	TRP2	HYL	ORN2	LYS2	1MHIS	HIS2	3MHIS	ANSP	CARSN	ARG2
NMP2	0	38.759	3.466	5.684	96.246	91.435	47.994	47.817	576.044	0	0.415	210.756	270.91	571.115	32.105	13.38	199.333	23.136	1.581	7.13	62.874	129.441	59.156	54.281	9.29	0.777	0	0	10.645	45.909	0	39.869	127.485	4.618	74.836	28.468	0	9.624	66.225
NMP3	0	37.385	3.929	5.575	93.917	88.912	45.467	51.482	557.267	0.963	0	206.432	266.994	556.015	31.341	13.133	194.341	22.7	1.513	4.68	61.442	126.56	57.645	53.832	8.927	0	0	0	10.519	45.21	0	39.188	125.249	4.486	73.412	27.728	0	8.81	67.972
NMP5	0	38.672	5.34	5.814	97.148	98.682	45.868	62.429	560.574	0	0	215.552	280.612	576.652	32.319	13.495	200.774	23.705	1.583	6.157	63.025	130.175	59.798	57.038	9.683	1.192	0	0	11.12	46.282	0	42.27	136.013	4.754	76.793	28.723	0	9.226	81.779
[truncated: 42 more rows]

## Sheet: Acyl Samples
	Gender	Age	Branched (B) or Straight (S) C4OH	FRC00	TC00	CARRAT	C02/d3-C2	C03/d3-C3	C04/d3-C4	C05/d9-C5	C05:1/C04-d3	C06/d3-C8	C08/d3-C8	C10/d9-C14	C10:1/C8-d3	C12/d9-C12	C12:1/d9-C14	C12:1-OH/d9-C14	C12-OH/d9-C14	C14/d9-C14	C14:1/d9-C14	C14:1-OH/C14-d9	C14:2/C14d9	C14-OH/C14-d9	C16/d3-C16	C16:1/C16-d3	C16:1OH/C16-d3	C16-OH/C16-d3	C18/d3-C18	C18:1/C18-d3	C18:1-OH/C18-d3	C18:2/C18-d3	C18:2OH/C18-d3	C3-DC/C8IS	C4DC/C08-d3	C4-OH	C5-DC/C8IS	C5-OH/C5OH-d3	Storage time
[truncated: 90 more rows]

[truncated: 2 more sheets: Acyl Storage, Key]
